# Supplementary material
Source: publisher figshare collection journal article supplement (https://frontiersin.figshare.com/ndownloader/files/23381066)
Supplement: Supplementary file 1 [file 23381066]

## Sheet: transcript_gene_list
TargetID	ProbeID	Sequence	Accession	Ensemble(Zebrafish)	Gene Symbol (Zebrafish)	GeneName (all fish)	GoIDs	...9	...10	try1$TargetID
M_beryllina_05_2013_comp100000_c0_seq2	CUST_6799_PI429335447	TGGGCTAAATCACCAGAGAACCCCTTAAACCAACGCTTTGCCACTTACAACACAAAGTGA	XP_003449059	ENSDART00000063863	ccdc124	coiled-coil domain-containing protein 124	GO:0008150	NA	NA	M_beryllina_05_2013_comp100000_c0_seq2
M_beryllina_05_2013_comp100013_c0_seq5	CUST_25846_PI429335447	CATTATGATGTTGATGTAACAGAAGAACCAAAACCAAGACACTACCAGGCTCCCAAGGAG	XP_003443234	NA	NA	PREDICTED: hypothetical protein LOC100692156	0	NA	NA	M_beryllina_05_2013_comp100013_c0_seq5
M_beryllina_05_2013_comp100018_c0_seq2	CUST_24019_PI429335447	ATTTCAACAACGACACTCCCAGCAAAGAGGCGCTATCGTCAGTCAAACAGCTCATTCTAT	XP_004075905	ENSDART00000064848	pglyrp5	peptidoglycan-recognition protein sc2-like	GO:0042742,GO:0009253,GO:0008745,GO:0008270,GO:0009252	NA	NA	M_beryllina_05_2013_comp100018_c0_seq2
M_beryllina_05_2013_comp100023_c4_seq1	CUST_17773_PI429335447	ACTCGCTGGTCTACAGGATGATCCCGCCCTCCAGTAAGAACTTCCTGGTGAACAACCTGG	CAP07992	ENSDART00000105175	LRFN5 (1 of 2)	leucine-rich repeat and fibronectin type-iii domain-containing protein 5-like	GO:0016020	NA	NA	M_beryllina_05_2013_comp100023_c4_seq1
M_beryllina_05_2013_comp100047_c0_seq1	CUST_10825_PI429335447	TGACAAAAGGAGTTCAGTACCTCAATGAAATCAAGGACAGTGTAGTGGCCGGTTTCCAGT	XP_004079231	ENSDART00000023931	eef2b	elongation factor 2	GO:0003746,GO:0042221,GO:0006184,GO:0003924,GO:0005525,GO:0009790,GO:0005840,GO:0006448	NA	NA	M_beryllina_05_2013_comp100047_c0_seq1
M_beryllina_05_2013_comp100049_c0_seq1	CUST_15355_PI429335447	AAACAATATCAGGTGAGACCAAACTGTACAGCTCGGACGACGAGAAGCTGGACCTAAAAT	XP_004542867	ENSDART00000105572	gbx1	homeobox protein gbx-1-like	GO:0006355,GO:0043565,GO:0003700,GO:0060827,GO:0021555,GO:0005667,GO:0045449	NA	NA	M_beryllina_05_2013_comp100049_c0_seq1
M_beryllina_05_2013_comp100051_c0_seq2	CUST_8413_PI429335447	ATGTCCACGGTTGGGAAAGCTATCGTTAAAATCGAGCTTTACGATAAAATGGGCCGTTAG	XP_004552327	ENSDART00000130280	apnl	cytolysin src-1-like	GO:0019898	NA	NA	M_beryllina_05_2013_comp100051_c0_seq2
M_beryllina_05_2013_comp100055_c0_seq1	CUST_27070_PI429335447	CAGTCTGACCCCACGCTGACCCAGTGGCTGCTGTTCCTGTCTGGCTGCCCGCTGCTCTGA	XP_004086456	NA	NA	PREDICTED: uncharacterized protein LOC101170409	0	NA	NA	M_beryllina_05_2013_comp100055_c0_seq1
M_beryllina_05_2013_comp100070_c0_seq1	CUST_14197_PI429335447	GAAAATCAAACATTTCCAGATCCTACCGTGTGAAGAGGATGGCCAAGTCTTCTTCAGCCT	XP_003966017	ENSDART00000137365	GRB10 (2 of 2)	growth factor receptor-bound protein 10-like	GO:0007165,GO:0005543	NA	NA	M_beryllina_05_2013_comp100070_c0_seq1
M_beryllina_05_2013_comp100077_c0_seq1	CUST_15115_PI429335447	GCCAAGCCCAAAGCCACCAAGGCCAAGAAGGCTCCGGCCAAGAAAGCGGCCAAGAAGTAG	AAH92909	ENSDART00000124705	histh1l	histone h1-like	GO:0050829,GO:0000786,GO:0006805,GO:0003677,GO:0006334,GO:0005576,GO:0050830,GO:0005634	NA	NA	M_beryllina_05_2013_comp100077_c0_seq1
M_beryllina_05_2013_comp100078_c1_seq1	CUST_19282_PI429335447	TCTCTATTGCACCCGGACAATAATCCGCAAAGACCATGTACCTTCACACTTGAATATCTG	XP_003200193	ENSDART00000128100	zgc:165409	map7 domain-containing protein 1	GO:0008150,GO:0008270,GO:0005622	NA	NA	M_beryllina_05_2013_comp100078_c1_seq1
M_beryllina_05_2013_comp100079_c0_seq1	CUST_18892_PI429335447	TCCAAGAAGCAGCTCATGTGGCTCCTCAACCGCCTGCAAGGCCTGCTGGAGCTGAACGTG	XP_004556579	ENSDART00000102530	kdm2bb	lysine-specific demethylase 2b-like	GO:0008270,GO:0003677	NA	NA	M_beryllina_05_2013_comp100079_c0_seq1
M_beryllina_05_2013_comp100084_c0_seq1	CUST_16825_PI429335447	AACCTCCAGATTAGTTTAAGGTGTTTTCCAGCGTCTGTCAGTTATGACTTTGGACAATAA	XP_004084288	ENSDART00000123311	ISM2 (2 of 2)	isthmin 1	GO:0005576,GO:0001525	NA	NA	M_beryllina_05_2013_comp100084_c0_seq1
M_beryllina_05_2013_comp100090_c0_seq3	CUST_11716_PI429335447	ACGTACCAGTTCATCATCCAAGTCGCTCCGGATCAGACTTCGATGTCTCAACCTTGCTGA	ABG89136	ENSDART00000127109	figla	factor in the germline alpha	GO:0046983,GO:0008585	NA	NA	M_beryllina_05_2013_comp100090_c0_seq3
M_beryllina_05_2013_comp100100_c0_seq1	CUST_31618_PI429335447	ATCATGCTGGTGTATGACATCACCAACGAGAAGTCCTTCGACAACATCAGGAACTGGATT	XP_003437639	ENSDART00000126618	megf8	ras-related protein rab-8a-like	GO:0032402,GO:0007264,GO:0015031,GO:0005525,GO:0035845	NA	NA	M_beryllina_05_2013_comp100100_c0_seq1
M_beryllina_05_2013_comp100107_c0_seq1	CUST_22639_PI429335447	TACAAGACCTTCACCCAGAAGTCCACGCTGATAGACCACATGAACCTCCACAGCGGCGAG	XP_003447264	ENSDART00000103955	zbtb12.2	novel protein containing btb poz domain	GO:0046872,GO:0003676,GO:0008270,GO:0005634,GO:0005622	NA	NA	M_beryllina_05_2013_comp100107_c0_seq1
M_beryllina_05_2013_comp100108_c0_seq1	CUST_3337_PI429335447	AACCGGCATAAGTACAAGAAGCTGCAAAAGCGGACAAAATTCTTAAGGAGGAGGGTGATG	XP_003438984	ENSDART00000113367	aurkaip1	aurora kinase a-interacting protein	GO:0016301,GO:0016310,GO:0003674	NA	NA	M_beryllina_05_2013_comp100108_c0_seq1
M_beryllina_05_2013_comp100114_c1_seq1	CUST_33097_PI429335447	TTTCGACTCTTCTCATTTGCGCTGATCGTCTTGAACTGTATGGAGTACAGCAACTGTCAG	XP_003453515	ENSDART00000109124	rspo2	r-spondin-2 precursor	GO:0001525,GO:0048010,GO:0016055,GO:0005794,GO:0005829	NA	NA	M_beryllina_05_2013_comp100114_c1_seq1
M_beryllina_05_2013_comp100138_c0_seq5	CUST_8743_PI429335447	AGCACTGAAGCACAAGAGAGACTCCTTCTTCATTGACTTATGCAGTGAAGCCGTCTTTAC	XP_004551084	ENSDART00000058290	dhdds	dehydrodolichyl diphosphate synthase	GO:0042462,GO:0050908,GO:0016765	NA	NA	M_beryllina_05_2013_comp100138_c0_seq5
M_beryllina_05_2013_comp100140_c0_seq1	CUST_36088_PI429335447	TCGAGGTCCAGGTTCTGTCCAACTGGGGCCACCCGGACTACACCTGCATGTACCGCTTCA	XP_004080796	ENSDART00000130261	sun1	sun domain-containing protein 1-like	GO:0003674,GO:0008150,GO:0005575	NA	NA	M_beryllina_05_2013_comp100140_c0_seq1
M_beryllina_05_2013_comp100145_c0_seq1	CUST_5887_PI429335447	CTACCACAGCTGGTATGGAGATCAGCGCTGTCTATTTTATTTTTATGTATTGTTTTGTTT	XP_004559474	ENSDART00000128815	stra13	centromere protein x-like	0	NA	NA	M_beryllina_05_2013_comp100145_c0_seq1
M_beryllina_05_2013_comp100146_c0_seq1	CUST_37033_PI429335447	TAAAGCAGAACTGTCCAGTATCAACAAAAAGCAAGCCGGGAAGAAGTTGCTAGGACAGTA	XP_004549593	ENSDART00000102969	spock3	testican-3 precursor	GO:0007165,GO:0005578,GO:0005509	NA	NA	M_beryllina_05_2013_comp100146_c0_seq1
M_beryllina_05_2013_comp100150_c0_seq3	CUST_11449_PI429335447	TGATGACGTTGAGGCTTTCGTCATTGACGCTGTACGGACCAAAATGGTGTACTGCAAAAT	XP_003442282	ENSDART00000010256	eif3m	eukaryotic translation initiation factor 3 subunit m	GO:0003743,GO:0001731,GO:0016282,GO:0005852,GO:0033290,GO:0006446,GO:0016787,GO:0005840	NA	NA	M_beryllina_05_2013_comp100150_c0_seq3
M_beryllina_05_2013_comp100153_c0_seq2	CUST_32155_PI429335447	AGTTTCCAGAGAGGACCGAGACCCCACCTTCATCTCCAAACAGATCCTGAGCGACTGCCA	XP_003459681	ENSDART00000109826	dicer1	retinoic acid-inducible protein i	GO:0004525,GO:0046872,GO:0035279,GO:0016442,GO:0008026,GO:0021591,GO:0070883,GO:0030423,GO:0031054,GO:0003725,GO:0005524,GO:0030422,GO:0005737,GO:0051252	NA	NA	M_beryllina_05_2013_comp100153_c0_seq2
M_beryllina_05_2013_comp100153_c0_seq5	CUST_10939_PI429335447	ACGACTAACAAAAATGCAGATTCATCTCCAAATCAGATCCTGAGCGATTGCCAGGCTGTG	XP_004082201	ENSDART00000109826	dicer1	endoribonuclease dicer-like	GO:0004519,GO:0035279,GO:0021591,GO:0070883,GO:0031054,GO:0044424,GO:0016246	NA	NA	M_beryllina_05_2013_comp100153_c0_seq5
M_beryllina_05_2013_comp100154_c0_seq1	CUST_1972_PI429335447	CAAGAAGGGGTGCTTGATTCTGATCCATTAGAAACCCAAGCAGGAGGTGCATTTGATTCT	XP_003459887	NA	NA	amphiphysin-like isoform x5	0	NA	NA	M_beryllina_05_2013_comp100154_c0_seq1
M_beryllina_05_2013_comp100156_c0_seq2	CUST_8614_PI429335447	AGTCATCAACAAAGACCAATGGTGCAACGTGTTAGAGTTCAGCAGGACAATCAACCTGGA	XP_003439816	ENSDART00000142721	dcun1d4	dcn1-like protein 5	GO:0003674,GO:0008150,GO:0005575	NA	NA	M_beryllina_05_2013_comp100156_c0_seq2
M_beryllina_05_2013_comp100159_c0_seq1	CUST_22624_PI429335447	AAGAGGAACAAGAATGTCTGCAGTGAAGAAAGTGTATATTCTCAGGTTAAAATCTCAACA	XP_004553643	NA	NA	novel immune-type receptor allele 2	0	NA	NA	M_beryllina_05_2013_comp100159_c0_seq1
M_beryllina_05_2013_comp100160_c0_seq1	CUST_28453_PI429335447	ACAAAAAAGAGACGGCTGTGAATATCGGATACTCCTGCAAACTACTGGATCCTAACGCCA	XP_003451413	ENSDART00000088890	atp8b3	probable phospholipid-transporting atpase ic-like	GO:0005488	NA	NA	M_beryllina_05_2013_comp100160_c0_seq1
M_beryllina_05_2013_comp100162_c0_seq2	CUST_22186_PI429335447	CCAGTATACAGCAATGGGATCCACAGTACACAGACTACTCTGGAGAGGAAGAAAGATTAA	XP_004554721	ENSDART00000007777	NPAS3	neuronal pas domain-containing protein 3-like	GO:0004871,GO:0007165	NA	NA	M_beryllina_05_2013_comp100162_c0_seq2
M_beryllina_05_2013_comp100164_c0_seq1	CUST_30853_PI429335447	TGTCGTTCTTCCACTACTCTGAGTTCCTGGTGACGGCGGTGATAAACCCGGGGAGTCTGT	XP_004086394	ENSDART00000025487	icmt	protein-s-isoprenylcysteine o-methyltransferase-like	GO:0006481,GO:0004671,GO:0016021,GO:0005783	NA	NA	M_beryllina_05_2013_comp100164_c0_seq1
M_beryllina_05_2013_comp100165_c0_seq1	CUST_35380_PI429335447	CGAGCGGGGGGAGGTCGCCCCCCAGTCCCTCAAGGAGGTGGTGATCCAGGAGTTCCTCTG	XP_003458347	NA	NA	sorting nexin-20-like	GO:0035091,GO:0007154	NA	NA	M_beryllina_05_2013_comp100165_c0_seq1
M_beryllina_05_2013_comp100166_c0_seq7	CUST_40561_PI429335447	GGCAAACCAATACTTGTGTTCGATGAAATCAAGAATAGAAGAATCACACAACTCCATTAA	XP_004564618	NA	NA	uncharacterized abhydrolase domain-containing protein ddb_g0269086-like	0	NA	NA	M_beryllina_05_2013_comp100166_c0_seq7
M_beryllina_05_2013_comp100175_c0_seq2	CUST_9754_PI429335447	ACCCGGAGGAGTGTGTGTACACACACTGCTGTCGCTGCGGGGGGAGATTCATCCTCCCGC	XP_004556298	ENSDART00000035714	dnajc24	dnaj homolog subfamily c member 24-like	GO:0005575,GO:0051082,GO:0006457	NA	NA	M_beryllina_05_2013_comp100175_c0_seq2
M_beryllina_05_2013_comp100182_c0_seq1	CUST_1111_PI429335447	TTGATGACTCCAGAGGAGATTGTACAGTACATCGCAGACAAGAAAGACGTTTATGAATAA	XP_003454974	ENSDART00000081337	ndufab1a	acyl carrier mitochondrial precursor	GO:0006633	NA	NA	M_beryllina_05_2013_comp100182_c0_seq1
M_beryllina_05_2013_comp100184_c0_seq4	CUST_42151_PI429335447	AATGCAGTGGACCATCATAAAGTAAGGATGTTCATGGGGAAAATACGAAATCTCCGAAAA	XP_003437657	ENSDART00000098928	zgc:162297	zgc:162297 protein	GO:0003824,GO:0008152	NA	NA	M_beryllina_05_2013_comp100184_c0_seq4
M_beryllina_05_2013_comp100189_c0_seq4	CUST_8599_PI429335447	AATCTGCAATTCCTGGAGGATGAGCACAGGAGGAATCATACTTTTGCTGCTTTGGATTGC	XP_004083659	ENSDART00000039017	moxd1l	dbh-like monooxygenase protein 2 homolog	GO:0006584,GO:0005507,GO:0016052,GO:0030246,GO:0004500,GO:0044425,GO:0055114,GO:0006570	NA	NA	M_beryllina_05_2013_comp100189_c0_seq4
M_beryllina_05_2013_comp100191_c1_seq2	CUST_20347_PI429335447	TACTTTCTGGAGGAAATCCAGCTTGGAGAGGAACTGCTGTTACATGGTGAGGTTGACAAA	XP_003979149	ENSDART00000028457	tomm20a	mitochondrial import receptor subunit tom20 homolog	GO:0006605,GO:0005742	NA	NA	M_beryllina_05_2013_comp100191_c1_seq2
M_beryllina_05_2013_comp100193_c0_seq3	CUST_17182_PI429335447	TTAAAACCATGGAGAAAGACAATGAGATCCAGTCAGCTAATGAAGTCAAGGAGGCTGTGG	XP_003450275	ENSDART00000113849	kif5ba	kinesin-1 heavy chain-like	GO:0007018,GO:0005875,GO:0005524,GO:0003777,GO:0005874	NA	NA	M_beryllina_05_2013_comp100193_c0_seq3
M_beryllina_05_2013_comp100202_c0_seq2	CUST_2035_PI429335447	AGCAAACTCCAGACAAGAACAAGAAAAAGAACCGCTGCTTTTCTTGCCGGAAGAAAGTGG	XP_004552762	ENSDART00000122677	si:rp71-61h23.4	an1-type zinc finger protein 5-like	GO:0008270,GO:0003677	NA	NA	M_beryllina_05_2013_comp100202_c0_seq2
M_beryllina_05_2013_comp100205_c0_seq5	CUST_33394_PI429335447	AGCTTCTGGTGCAATGCAGGATCAGTATTCCACCCCACAGTATAATGACAACCAGATGTA	XP_004067468	ENSDART00000028338	scamp5	secretory carrier-associated membrane protein 5-like	GO:0030054,GO:0016021,GO:0000139,GO:0030672,GO:0045956,GO:0050715,GO:0055038,GO:0005886	NA	NA	M_beryllina_05_2013_comp100205_c0_seq5
M_beryllina_05_2013_comp100214_c0_seq1	CUST_244_PI429335447	ATCATCTGCAGTCAAACCAGTGAAGCCATTTGGTTCAGGAGTGAAGACGTTTTGCCGAAA	XP_004555742	ENSDART00000076835	mrpl1	39s ribosomal protein mitochondrial-like	GO:0003723,GO:0003735,GO:0015934,GO:0042254	NA	NA	M_beryllina_05_2013_comp100214_c0_seq1
M_beryllina_05_2013_comp100216_c0_seq1	CUST_26305_PI429335447	GTCCAATCACAAGTCGAGGGAGTACTCGTCCTCCAACCACAAAACATGGGATCCCCCGTC	XP_003969783	ENSDART00000082842	JPH3 (2 of 2)	PREDICTED: junctophilin-3-like	0	NA	NA	M_beryllina_05_2013_comp100216_c0_seq1
M_beryllina_05_2013_comp100216_c1_seq1	CUST_9070_PI429335447	AAACTGTGGTTCCAAAGACTTGTACAAAAACACAGACCTGATGTGGAAGCAGAGCGTGTG	CAG04647	ENSDART00000058789	qdpra	dihydropteridine reductase	GO:0004155,GO:0050662,GO:0000166,GO:0055114,GO:0046656	NA	NA	M_beryllina_05_2013_comp100216_c1_seq1
M_beryllina_05_2013_comp100218_c1_seq3	CUST_16210_PI429335447	ACTGTGCCCAGGTTTACTTTAAGGCAAAATCTAAGCACACACCTGCTCTGCTGAAGTACA	XP_004065659	ENSDART00000031858	GPR137B (3 of 3)	integral membrane protein gpr137b-like	0	NA	NA	M_beryllina_05_2013_comp100218_c1_seq3
M_beryllina_05_2013_comp100224_c1_seq1	CUST_19954_PI429335447	GTTAGAAAAAACACACACTCACCCCAAACTGCTACCCTTCAGGGTGAACGGTCCAATTTT	XP_004564420	ENSDART00000103003	NSUN7	methyltransferase nsun5-like	GO:0008168,GO:0016740,GO:0032259,GO:0008150,GO:0005575	NA	NA	M_beryllina_05_2013_comp100224_c1_seq1
M_beryllina_05_2013_comp100230_c0_seq1	CUST_22093_PI429335447	AGGAATGACATCATGCTCAGTGCCGTGGTCATGACATACTGGACTAACTTTGCAAAGAGT	ADB12643	ENSDART00000126074	nlgn3a	neuroligin 3b	GO:0007155,GO:0016020	NA	NA	M_beryllina_05_2013_comp100230_c0_seq1
M_beryllina_05_2013_comp100239_c0_seq1	CUST_9913_PI429335447	TGTATGACTACCAAGCAGAGGATGAATCTGAGATCTCCTTTGAACCAGGTGACATCATCA	XP_004544473	ENSDART00000134633	si:dkey-40c11.2	drebrin-like protein	GO:0003779,GO:0005622	NA	NA	M_beryllina_05_2013_comp100239_c0_seq1
M_beryllina_05_2013_comp100243_c0_seq1	CUST_10282_PI429335447	TCGTAAACACAGCAATCTAATCACTGTGCCCATTCAAGATGATTCCTCCACTTCAAGGGA	XP_003449790	ENSDART00000066979	cbll1	e3 ubiquitin-protein ligase hakai-like	GO:0008270	NA	NA	M_beryllina_05_2013_comp100243_c0_seq1
M_beryllina_05_2013_comp100247_c0_seq1	CUST_26203_PI429335447	GATAGATCAACTAGACGACTTAGTCTACCGCATCCAAAAGAGCCCAAGATCGAAGGCTAA	XP_003460252	ENSDART00000130804	CU041398.1	PREDICTED: hypothetical protein LOC100709671	0	NA	NA	M_beryllina_05_2013_comp100247_c0_seq1
M_beryllina_05_2013_comp100248_c1_seq1	CUST_33889_PI429335447	ATCCTGGTGATGAGGGAAAATAAGAACCCCAACATAGTCAACTACCTGGACAGTTACCTG	XP_004575564	ENSDART00000098417	pak2a	serine threonine-protein kinase pak 1-like	GO:0006468,GO:0005524,GO:0004674,GO:0009069	NA	NA	M_beryllina_05_2013_comp100248_c1_seq1
M_beryllina_05_2013_comp100248_c3_seq1	CUST_33895_PI429335447	AAAGGACCGATTAGAGATCTCCTCCCCGTTAGATTTTGAACACACCTTACATGTGGGCTT	CAG10934	ENSDART00000046678	pak2b	serine threonine-protein kinase pak 2-like isoform 1	GO:0001568,GO:0006468,GO:0005524,GO:0004674,GO:0009069	NA	NA	M_beryllina_05_2013_comp100248_c3_seq1
M_beryllina_05_2013_comp100252_c1_seq6	CUST_33715_PI429335447	AATGTCAGGAAGTCGTAAACGCAGTTTGGAGGAAGATGAAGACTTTGGAGCAATGCAGGT	XP_004539607	ENSDART00000039165	styx	serine threonine tyrosine-interacting protein	GO:0008138,GO:0007283,GO:0005737,GO:0001714,GO:0006470	NA	NA	M_beryllina_05_2013_comp100252_c1_seq6
M_beryllina_05_2013_comp100258_c0_seq1	CUST_11221_PI429335447	ATGATGCACGAGGACACTTTCTGCAACCTGAATGACTTCAACTACATCAGGAATGCACTG	XP_003445031	ENSDART00000101461	epyc	epyc protein	GO:0008150,GO:0005575	NA	NA	M_beryllina_05_2013_comp100258_c0_seq1
M_beryllina_05_2013_comp100258_c0_seq2	CUST_27076_PI429335447	AATAACTCTTGTCCCTAAACCTGATGAAGAGGAGGAGCTGCTTCCAATCACACCTGAAAC	XP_004083110	NA	NA	PREDICTED: uncharacterized protein LOC101170808	0	NA	NA	M_beryllina_05_2013_comp100258_c0_seq2
M_beryllina_05_2013_comp100260_c0_seq1	CUST_7336_PI429335447	TGTCACAACAACTGTCCTTATGTACCATATACTAACCCTGCTCTTTGGGGATACAGGCCA	XP_004560344	ENSDART00000053993	wisp2	connective tissue growth factor-like	GO:0030903,GO:0005520,GO:0001558,GO:0016942	NA	NA	M_beryllina_05_2013_comp100260_c0_seq1
M_beryllina_05_2013_comp100278_c0_seq1	CUST_32230_PI429335447	TTTGTGTAGTGTTTGCTCCATATGTGAGCATTGCTCCACAAACTGTAACAGTTGCCCCTG	XP_004571462	ENSDART00000152168	HRC	retrotransposon-like protein 1-like isoform x1	0	NA	NA	M_beryllina_05_2013_comp100278_c0_seq1
M_beryllina_05_2013_comp100282_c0_seq2	CUST_37243_PI429335447	TATTGCCTGAAAGTGCTTCATAAGGAGGGAAAGAACTTCAAAGCTCTCTACCGGTCTGGA	XP_003445465	ENSDART00000110356	TTC9	tetratricopeptide repeat protein 9a-like	GO:0005575	NA	NA	M_beryllina_05_2013_comp100282_c0_seq2
M_beryllina_05_2013_comp100295_c0_seq2	CUST_14626_PI429335447	AAGAAAAAGAGAAACAACATTAAGCTTTACGTGCGCAGAGTCTTCATCATGGATAACTGT	AEH27540	ENSDART00000004756	hsp90aa1.1	heat shock protein hsp 90-alpha 1-like	GO:0030018,GO:0006457,GO:0030240,GO:0030235,GO:0007517,GO:0048769,GO:0042470,GO:0005524,GO:0048471,GO:0051082,GO:0045429,GO:0030241,GO:0006950	NA	NA	M_beryllina_05_2013_comp100295_c0_seq2
M_beryllina_05_2013_comp100296_c0_seq1	CUST_42526_PI429335447	ATTTCGTAATTACAAGGAGATGTTCCAGAGGATGGAGGAAACCTTCAAGTTCTGCACCGG	CBN81323	ENSDART00000115297	MSS51	zinc finger mynd domain-containing protein 17-like	GO:0008270	NA	NA	M_beryllina_05_2013_comp100296_c0_seq1
M_beryllina_05_2013_comp100300_c0_seq1	CUST_10474_PI429335447	ACACAGGCCAAACCCACCCAGGCCCCGCCCCCTCTGGCCACGCCCACATTGGCCCCGCCC	XP_004575288	NA	NA	e3 ubiquitin-protein ligase topors-like isoform x2	0	NA	NA	M_beryllina_05_2013_comp100300_c0_seq1
M_beryllina_05_2013_comp100300_c0_seq2	CUST_10471_PI429335447	TCCGGGCAGCCCGGAGGTCGGCGGCGACCTCAGTGACGGGGACGCCGGCCGCTCGCCGCT	XP_004575287	NA	NA	e3 ubiquitin-protein ligase topors-like isoform x1	0	NA	NA	M_beryllina_05_2013_comp100300_c0_seq2
M_beryllina_05_2013_comp100315_c0_seq2	CUST_33379_PI429335447	ATGACAAATAATCCTGTTTCACCAGACGTTCTTCCCTTCGGATATCCTCCTCAAAGCATT	XP_003454276	NA	NA	secretory calcium-binding phosphoprotein 5 precursor	0	NA	NA	M_beryllina_05_2013_comp100315_c0_seq2
M_beryllina_05_2013_comp100320_c0_seq2	CUST_19330_PI429335447	AGAGGACAGCCAGCCAGGACATGTCGTCCTATGGGTATGGGGGGGGCCCCTCGGGGGGGG	XP_004538872	NA	NA	mastermind-like protein 3-like	0	NA	NA	M_beryllina_05_2013_comp100320_c0_seq2
M_beryllina_05_2013_comp100322_c0_seq1	CUST_12397_PI429335447	TCCAAAATTCCACCCAACGCCAAGCTGATTTTTGAAGTTGAACTGGTGGCTGTGGATTAA	XP_003440701	ENSDART00000127321	fkbp3	fk506-binding protein 3	GO:0006457,GO:0005528,GO:0000413,GO:0016020,GO:0005634,GO:0003755	NA	NA	M_beryllina_05_2013_comp100322_c0_seq1
M_beryllina_05_2013_comp100323_c0_seq3	CUST_16537_PI429335447	GATTTTAAGGTAAGTCTGGGCTTTTTGTGGAAAACACCAGTGAGTAGGTCAGATTGCCTT	CBN81291	NA	NA	interleukin-21 receptor-like	GO:0004896,GO:0016020	NA	NA	M_beryllina_05_2013_comp100323_c0_seq3
M_beryllina_05_2013_comp100325_c0_seq3	CUST_1732_PI429335447	TATTGCTTATAAACCTTTCCTTCAAGCGTCAAGGTCATCGCCTCTCTTCAGAGCGTTCTA	XP_004564126	ENSDART00000005090	alg9	alpha- -mannosyltransferase alg9-like	GO:0006506,GO:0031227,GO:0016757	NA	NA	M_beryllina_05_2013_comp100325_c0_seq3
M_beryllina_05_2013_comp100332_c0_seq2	CUST_3502_PI429335447	TCAGATCTCCAGACCCGCGCCCAACTTCCCAAGATGCATCAGCAAGAGGAACATGCTGAG	XP_004573737	ENSDART00000130310	CABZ01090303.1	band -like protein 3-like	GO:0005737,GO:0019898,GO:0005856,GO:0003779,GO:0005198,GO:0030866,GO:0008092	NA	NA	M_beryllina_05_2013_comp100332_c0_seq2
M_beryllina_05_2013_comp100334_c0_seq2	CUST_17371_PI429335447	GAATCATGTAAAAAGGATGAAAACATCATGCAGTCCATGCAGTTGTTCGACAACGTCATC	XP_004555893	ENSDART00000110900	kcnip2	kv channel-interacting protein 2-like isoform 1	0	NA	NA	M_beryllina_05_2013_comp100334_c0_seq2
M_beryllina_05_2013_comp100334_c0_seq5	CUST_17374_PI429335447	GAATCATGTAAAAAGGATGAAAACATCATGCAGTCCATGCAGTTGTTCGACAACGTCATC	XP_004555895	ENSDART00000110900	kcnip2	kv channel-interacting protein 2-like isoform 2	0	NA	NA	M_beryllina_05_2013_comp100334_c0_seq5
M_beryllina_05_2013_comp100341_c1_seq1	CUST_27808_PI429335447	TTATAAAACCTTTGACCCGTCCATCTCCACCTTGAGAGACAATAAAGGCAAGGGGTCTGT	XP_004558468	NA	NA	PREDICTED: uncharacterized protein LOC101486811 isoform X2	0	NA	NA	M_beryllina_05_2013_comp100341_c1_seq1
M_beryllina_05_2013_comp100350_c0_seq1	CUST_39655_PI429335447	CACCCTCGTGAGCTCAGCCATTCTCATCATGCCAACTTCTTCGGCCTTTACAAAATTTGA	XP_003439775	ENSDART00000080261	faslg	tumor necrosis factor alpha	GO:0005102,GO:0007165	NA	NA	M_beryllina_05_2013_comp100350_c0_seq1
M_beryllina_05_2013_comp100355_c0_seq1	CUST_14677_PI429335447	CCAGAGCATAAAATGTTTGTCACTGTTGAAGTCTGCTTTGTATGACATCTTTATGTACTA	XP_003447944	ENSDART00000103029	hn1a	hematological and neurological expressed 1	GO:0003674,GO:0008150,GO:0005575	NA	NA	M_beryllina_05_2013_comp100355_c0_seq1
M_beryllina_05_2013_comp100359_c0_seq3	CUST_7537_PI429335447	ACTCATTCCTGGAGTCATTCCAGGGATTCTTCGTCTCGGTGTTTTACTGTTTCCTGAACA	XP_003961160	ENSDART00000111751	crhr1	corticotropin-releasing factor receptor 1-like	GO:0016021,GO:0007186,GO:0005886,GO:0004930	NA	NA	M_beryllina_05_2013_comp100359_c0_seq3
M_beryllina_05_2013_comp100361_c1_seq1	CUST_26356_PI429335447	CATGTTACAAATTGAAGTAAGTGAAGACCAATCCCATATGTACAATTTTCCTCAGCCCCA	XP_004554882	NA	NA	PREDICTED: nesprin-2-like	0	NA	NA	M_beryllina_05_2013_comp100361_c1_seq1
M_beryllina_05_2013_comp100369_c0_seq2	CUST_22762_PI429335447	CTTTGTAGAATATTATACCAGAGGAGATGCAGAAAACGCCATGCGCTTTGTGAATGGCAC	XP_004068089	ENSDART00000008365	ncbp2	nuclear cap-binding protein subunit 2	GO:0046833,GO:0006417,GO:0005846,GO:0000340,GO:0031047,GO:0006370,GO:0045292,GO:0006408,GO:0000166,GO:0005737,GO:0000184,GO:0005634,GO:0051028,GO:0030880	NA	NA	M_beryllina_05_2013_comp100369_c0_seq2
M_beryllina_05_2013_comp100374_c1_seq1	CUST_27217_PI429335447	CAGAAAACAGTGGAAGATACACAAGATAATGAAAAACTAAGGGCCGCCACAAGAAAGCCA	XP_004564411	NA	NA	PREDICTED: uncharacterized protein LOC101465225	0	NA	NA	M_beryllina_05_2013_comp100374_c1_seq1
M_beryllina_05_2013_comp100375_c0_seq1	CUST_3637_PI429335447	ACACTCTTAAGCCTGACCATTTGTATTCTCACCTACTTGTTATGGAAGAAAATAGCTTAG	ADB55705	ENSDART00000124808	CU984584.1	bcl-2-like protein 1-like	GO:0006915	NA	NA	M_beryllina_05_2013_comp100375_c0_seq1
M_beryllina_05_2013_comp100376_c0_seq1	CUST_24421_PI429335447	GAGAGATCATCCCGTGGTAAATGGGATTTTCAGGCCTTCATCACAAGGTTTAATCTGGGA	XP_003452689	ENSDART00000127728	PEBP4	phosphatidylethanolamine-binding protein 1	GO:0003674,GO:0008150,GO:0005575	NA	NA	M_beryllina_05_2013_comp100376_c0_seq1
M_beryllina_05_2013_comp100380_c0_seq1	CUST_22105_PI429335447	AAGTCCAGAACATATTCAAGCGATTCCTGTTTCATTACTCCAAAGCGCGCAACTCCATCG	XP_004081471	ENSDART00000111194	nms	neuromedin s	0	NA	NA	M_beryllina_05_2013_comp100380_c0_seq1
M_beryllina_05_2013_comp100385_c0_seq1	CUST_13156_PI429335447	CCTGAAGATGACTTTGACGGGTTGGAGCAGCAGCTTTCTTGTTATTTAAAAGCACCATAA	XP_004070140	NA	NA	gdp-d-glucose phosphorylase 1-like	GO:0005737,GO:0080048,GO:0006006	NA	NA	M_beryllina_05_2013_comp100385_c0_seq1
M_beryllina_05_2013_comp100389_c0_seq1	CUST_1588_PI429335447	ATATGAATCTTTTGTGAAATTCACACAAGACCAGATCATGCGAAGATACGGAGCCCGGCC	XP_004078353	ENSDART00000058472	akirin1	akirin 1	0	NA	NA	M_beryllina_05_2013_comp100389_c0_seq1
M_beryllina_05_2013_comp100397_c0_seq2	CUST_14767_PI429335447	ACTTCTATTTCAACCAGACCAAAGGTTTTCCATGCCTAAAGAAGCCTGAGGGGAGCAGTA	XP_004562366	ENSDART00000083940	HS3ST6	heparan sulfate glucosamine 3-o-sulfotransferase 3b1-like	GO:0008146	NA	NA	M_beryllina_05_2013_comp100397_c0_seq2
M_beryllina_05_2013_comp100400_c0_seq1	CUST_42361_PI429335447	GTTACAACATCCCTTCGAGAACATCAATAACTTCTCGCCTCGAAGCTCGGTTCGAAAAAA	XP_004544460	ENSDART00000098218	CU138508.1	zinc finger bed domain-containing protein 1-like	GO:0003676,GO:0046983	NA	NA	M_beryllina_05_2013_comp100400_c0_seq1
M_beryllina_05_2013_comp100402_c0_seq1	CUST_5335_PI429335447	ATGAGACCTGCAATAACTACCAGGCTGTAAACCAAAAGTGCGAGCTTTTCAACCAGTGTG	ACQ58890	ENSDART00000074189	CABZ01050249.1	cathepsin z precursor	GO:0001525,GO:0006508,GO:0008234	NA	NA	M_beryllina_05_2013_comp100402_c0_seq1
M_beryllina_05_2013_comp100421_c0_seq1	CUST_25816_PI429335447	AAGTACAAAACTGTGTCGTACAGGAAGATTCGCAAAGGAAACACCAAGCAGAGGGTGGAT	XP_003454759	NA	NA	PREDICTED: hypothetical protein LOC100691136	0	NA	NA	M_beryllina_05_2013_comp100421_c0_seq1
M_beryllina_05_2013_comp100423_c0_seq1	CUST_31669_PI429335447	AGAGTTCTGGATCAGCACAAGCTCAACAAGGAGCAATGGGAGGAGAGGATTCAGGTGTGG	XP_003456217	ENSDART00000016214	msna	rdx partial	GO:0005737,GO:0005856,GO:0019898,GO:0008092,GO:0042074,GO:0007492,GO:0072554	NA	NA	M_beryllina_05_2013_comp100423_c0_seq1
M_beryllina_05_2013_comp100428_c0_seq1	CUST_19531_PI429335447	TAAAACAAAGATCCAAGAAGCTCGGGAGCAGATCTCCAATATGCCAGGAATAGAGAGCAG	XP_004559456	ENSDART00000152308	MED9	mediator of rna polymerase ii transcription subunit 9-like	GO:0006357,GO:0001104,GO:0016592	NA	NA	M_beryllina_05_2013_comp100428_c0_seq1
M_beryllina_05_2013_comp100429_c0_seq1	CUST_29509_PI429335447	CTCACTGGATGGAGCTGCAGCACAGGCAACAAAGTCAAAACCACAAAGGTGACCCGATAG	XP_004558876	ENSDART00000111190	si:dkey-238f9.1	protein fam19a2-like	GO:0003674,GO:0008150,GO:0005575	NA	NA	M_beryllina_05_2013_comp100429_c0_seq1
M_beryllina_05_2013_comp100446_c0_seq3	CUST_23281_PI429335447	AAGAAAGATGCTGGAGAGTACATCTGTGAGGTTGGGACCGAAAAGCTTGTCTTCAAACTG	XP_004543069	ENSDART00000128774	CR792456.1	obscurin-like protein 1-like	GO:0071704,GO:0044237,GO:0014866,GO:0000902,GO:0045214,GO:0060047,GO:0008307,GO:0044238,GO:0003824	NA	NA	M_beryllina_05_2013_comp100446_c0_seq3
M_beryllina_05_2013_comp100452_c1_seq1	CUST_36478_PI429335447	TTTTTAAGGACTTGGCCGTTATGATTCATGACCAGGGAGAGATGATCGATAGCATCGAGG	XP_004573713	ENSDART00000041578	stx12	syntaxin-12-like isoform x2	GO:0016020,GO:0005484,GO:0016192,GO:0006886,GO:0005622	NA	NA	M_beryllina_05_2013_comp100452_c1_seq1
M_beryllina_05_2013_comp100459_c0_seq3	CUST_40906_PI429335447	ACATTTACAATACCAGCAGGAGGCTATCCAGAAGAATGTCGAGCACTCCAAAAACCTGCA	XP_003455049	ENSDART00000077383	C13H10orf32	upf0693 protein c10orf32 homolog	GO:0003674,GO:0008150,GO:0005575	NA	NA	M_beryllina_05_2013_comp100459_c0_seq3
M_beryllina_05_2013_comp100465_c0_seq2	CUST_772_PI429335447	ATCGAACTATATACCCAGTACTTGGAGAGACTCAAGCAGTTTATCACGTTTGAGCTGCCG	XP_003450477	ENSDART00000081323	abhd17c	abhydrolase domain-containing protein fam108c1-like	GO:0016787	NA	NA	M_beryllina_05_2013_comp100465_c0_seq2
M_beryllina_05_2013_comp100468_c0_seq2	CUST_5656_PI429335447	AATATATTTTCAACGGGAATCCAAATGCATCAGACGGTGTCTCTCCAGCCTTTGCCCAAG	XP_003453136	ENSDART00000006648	mnat1	cdk-activating kinase assembly factor mat1	GO:0016301,GO:0007049,GO:0016310,GO:0005634,GO:0008270	NA	NA	M_beryllina_05_2013_comp100468_c0_seq2
M_beryllina_05_2013_comp100476_c0_seq1	CUST_16165_PI429335447	AACACCCCAACAACAGCAACATCCGCTGCAGCCCGCAGGACAAGCGCTGCATCCAGAGGA	XP_004538784	ENSDART00000025256	igfbp2b	insulin-like growth factor binding protein 4	GO:0050896,GO:0048523,GO:0001558,GO:0005520,GO:0032502,GO:0016942	NA	NA	M_beryllina_05_2013_comp100476_c0_seq1
M_beryllina_05_2013_comp100483_c0_seq1	CUST_18568_PI429335447	ATCGGGACGGGAAGAGGGCGGCGGCGCCCGCCAGGGACGGCGAGCCCGGCGGGTCCTCGA	CAG00637	NA	NA	low quality protein: helicase srcap-like	0	NA	NA	M_beryllina_05_2013_comp100483_c0_seq1
M_beryllina_05_2013_comp100486_c0_seq1	CUST_8134_PI429335447	GACAGATTGGAGCGATTCTTTGATTCAGAAGATGAGGAGTTTGAGATCCTGTCCTTGTGA	XP_004552916	ENSDART00000121558	atg4b	cysteine protease atg4b-like	GO:0015031,GO:0005737,GO:0006914,GO:0006508,GO:0008234	NA	NA	M_beryllina_05_2013_comp100486_c0_seq1
M_beryllina_05_2013_comp100487_c0_seq1	CUST_34558_PI429335447	ACCAAGTTCGACACTATAGATGACAAGGTCGGTGCTGCCATATCCATGACTTACATCACA	XP_004543988	ENSDART00000086823	srpr	signal recognition particle receptor subunit alpha-like isoform 1	GO:0005047,GO:0005525,GO:0006184,GO:0005785,GO:0006614,GO:0003924,GO:0005786	NA	NA	M_beryllina_05_2013_comp100487_c0_seq1
M_beryllina_05_2013_comp100495_c0_seq1	CUST_3040_PI429335447	AATGAGTCCAAAGATATCTTGGATATCTCCAATTACACACCTCAGAAGGCGAAGCGCCAG	CAG10024	ENSDART00000151571	ahdc1	at-hook dna-binding motif-containing protein 1-like	0	NA	NA	M_beryllina_05_2013_comp100495_c0_seq1
M_beryllina_05_2013_comp100495_c0_seq2	CUST_3043_PI429335447	AGAACTTTGGATCTCAGTATCATGGCTACGGTGAATACGGCTCCAATGAGTCCAAAGATA	XP_004548059	ENSDART00000151571	ahdc1	at-hook dna-binding motif-containing protein 1-like isoform x1	0	NA	NA	M_beryllina_05_2013_comp100495_c0_seq2
M_beryllina_05_2013_comp100501_c0_seq1	CUST_36787_PI429335447	TTCACCGCGCTGGCCCTAAAGCGTGGAATCCACAGAGGAGCCTTAAAGAGCAACTGGTGA	XP_004556966	ENSDART00000142598	timd4	t-cell immunoglobulin and mucin domain-containing protein 4 precursor	0	NA	NA	M_beryllina_05_2013_comp100501_c0_seq1
M_beryllina_05_2013_comp100501_c0_seq2	CUST_14794_PI429335447	AGGAACCTTAAAGAGCAACTGTTTCTCCTCTGAGGAGCTCCCTCACATCATCTATGAGAT	XP_004556966	ENSDART00000142598	timd4	hepatitis a virus cellular receptor 2 homolog	GO:0005575	NA	NA	M_beryllina_05_2013_comp100501_c0_seq2
M_beryllina_05_2013_comp100505_c1_seq12	CUST_24160_PI429335447	ATACAGAGGATCAATACCCCCAGGAAACAGGGTGGTCTTGGACAAATGAAAATCCCTCTA	XP_003446887	ENSDART00000100061	prdx4	peroxiredoxin 4	GO:0055114,GO:0016209,GO:0051920	NA	NA	M_beryllina_05_2013_comp100505_c1_seq12
M_beryllina_05_2013_comp100506_c0_seq1	CUST_19651_PI429335447	ACAGCCCTTATTATAATGAAGCATATTAACAAGGAACTGCAGAGTAAGCAAGAGAGAAAC	XP_003440885	ENSDART00000034492	PAQR8 (1 of 2)	membrane progestin receptor beta	GO:0007194,GO:0003707,GO:0016021,GO:0048545,GO:0005496,GO:0001556,GO:0005886,GO:0000187,GO:0006355	NA	NA	M_beryllina_05_2013_comp100506_c0_seq1
M_beryllina_05_2013_comp100512_c0_seq2	CUST_8959_PI429335447	AAGAAAACAGCTCTGATCCACTCAGGACCTGGATCAGGAAGGATTCTGTATGAACCTGAT	XP_003458750	ENSDART00000097871	elp5	dermal papilla-derived protein 6 homolog	GO:0033588,GO:0030335,GO:0005737,GO:0005634	NA	NA	M_beryllina_05_2013_comp100512_c0_seq2
M_beryllina_05_2013_comp100515_c1_seq1	CUST_14974_PI429335447	ACTACAGTTCCAAGCAGCGGGACATCATCGCCAAAAGCCTGGAGAGCTTCCACAGCTGCA	XP_003969659	ENSDART00000114934	c6ast3	high choriolytic enzyme 1- partial	GO:0008233	NA	NA	M_beryllina_05_2013_comp100515_c1_seq1
M_beryllina_05_2013_comp100516_c1_seq1	CUST_40354_PI429335447	AAGAATGGAGACGTTTGTATCTCGATCCTCCATGAGCCAGGAGAAGACAAGTTTGGCTAT	ACQ59056	ENSDART00000101263	ube2g1b	ubiquitin-conjugating enzyme e2 g1	GO:0004842,GO:0016567	NA	NA	M_beryllina_05_2013_comp100516_c1_seq1
M_beryllina_05_2013_comp100518_c0_seq1	CUST_41278_PI429335447	CTGCTGGCGCTGCTGCCCGGGGGGGCCGCGGGGCTGCGGCTGCTGGGGGGGCTGGCGGCG	XP_004078825	ENSDART00000103010	sft2d3	vesicle transport protein sft2c-like	GO:0016021,GO:0016192	NA	NA	M_beryllina_05_2013_comp100518_c0_seq1
M_beryllina_05_2013_comp100526_c0_seq2	CUST_37354_PI429335447	AAACTGTCGAGACTGCTTTTGCAATGGACCCAGAGGAATTTAAGGCCAAGTATGGAGTTC	XP_003444641	ENSDART00000105898	TSTD1	thiosulfate sulfurtransferase rhodanese-like domain-containing protein 1-like	GO:0016740	NA	NA	M_beryllina_05_2013_comp100526_c0_seq2
M_beryllina_05_2013_comp100527_c0_seq1	CUST_826_PI429335447	TTGTTGTGTTCACTACCGTAGGAACTCTGGCCATTTTTGCAGAGGCTAGTCTAAACCACA	XP_004571072	ENSDART00000101528	chrnb1	acetylcholine receptor subunit beta-like	GO:0030054,GO:0015464,GO:0005892,GO:0030239,GO:0007271,GO:0045211,GO:0004889,GO:0007165,GO:0006812	NA	NA	M_beryllina_05_2013_comp100527_c0_seq1
M_beryllina_05_2013_comp100531_c0_seq1	CUST_8884_PI429335447	GGGAATAACGTGAGGAGTTCTGTAATGATTGAGAAGGTGAAGGAGTTCTTGAGCACATTG	XP_003449700	ENSDART00000098499	dck	deoxycytidine kinase	GO:0016773,GO:0016301,GO:0016310,GO:0006139,GO:0005524	NA	NA	M_beryllina_05_2013_comp100531_c0_seq1
M_beryllina_05_2013_comp100541_c0_seq1	CUST_24820_PI429335447	AACTGATAACAATGAGTCCATTAAGTACAGGCCTCGAAGGAGGAAGTGCAAGAAGACTGC	ACQ57840	ENSDART00000033559	vegfab	placenta growth factor-like	GO:0001569,GO:0030097,GO:0048010,GO:0001938,GO:0002043,GO:0008083,GO:0035477,GO:0008016,GO:0048793,GO:0048844,GO:0007202,GO:0030878,GO:0043491,GO:0005576,GO:0035479,GO:0005622,GO:0031334,GO:0050731,GO:0003262,GO:0051894,GO:0008045,GO:0001570,GO:0040007	NA	NA	M_beryllina_05_2013_comp100541_c0_seq1
M_beryllina_05_2013_comp100550_c0_seq2	CUST_24289_PI429335447	CGCCGTGAGAAGGAGGGGAGGGAGAAGGCGCCCCCGGAGGATGAGGATGAAGAGGAGGAT	XP_004080901	ENSDART00000110011	PHC3 (2 of 2)	phc2 protein	GO:0046872,GO:0035102,GO:0007275,GO:0008270,GO:0003677,GO:0005634	NA	NA	M_beryllina_05_2013_comp100550_c0_seq2
M_beryllina_05_2013_comp100552_c0_seq4	CUST_25822_PI429335447	AATGCACTCAGTATGTCACCAGTGGAAATATCACTGACACAGGTAAAACTGTTTCTATGA	XP_003439384	ENSDART00000131369	si:dkey-29d8.3	PREDICTED: hypothetical protein LOC100691328	0	NA	NA	M_beryllina_05_2013_comp100552_c0_seq4
M_beryllina_05_2013_comp100554_c0_seq2	CUST_5617_PI429335447	AAATGGCAACTGCAACAGCTATGGACACCTCAACAATGACATTGCCCTGGGTTTTAAGCA	XP_004554591	ENSDART00000074707	cdc42ep3	cdc42 effector protein 3-like	GO:0003674,GO:0008150,GO:0005575	NA	NA	M_beryllina_05_2013_comp100554_c0_seq2
M_beryllina_05_2013_comp100557_c0_seq1	CUST_35530_PI429335447	AACAGGTCAACAGATGAATCTCTGGACACAGATGAGTTCAGGAACTTCTTCCTGAGGTCT	XP_004553760	ENSDART00000128072	CABZ01085878.1	spermatogenesis-associated protein 5-like	GO:0000166	NA	NA	M_beryllina_05_2013_comp100557_c0_seq1
M_beryllina_05_2013_comp100560_c0_seq3	CUST_41506_PI429335447	GTGGTGTACTTTGTTGTGTTCCCTTTTTTCTTCGTCAACATCTTTGTGGCTCTCATCATC	XP_004542840	ENSDART00000089971	cacna1r	voltage-dependent r-type calcium channel subunit alpha-1e-like	GO:0005245,GO:0034765,GO:0070588,GO:0005891	NA	NA	M_beryllina_05_2013_comp100560_c0_seq3
M_beryllina_05_2013_comp100567_c0_seq1	CUST_40420_PI429335447	TCTCTGAACTACGTTCTGTCCTGGCTCAGCCTGGTGGGTCCGGTTCTGGGTCTGGAGGTC	XP_004565157	ENSDART00000130269	atg10	ubiquitin-like-conjugating enzyme atg10-like	GO:0003674	NA	NA	M_beryllina_05_2013_comp100567_c0_seq1
M_beryllina_05_2013_comp100573_c0_seq1	CUST_41656_PI429335447	AGAAATGGAACAAGATAAAGCTGGTGGTAACCCAGGAAGATGTAGAGCTAGCGTACCATG	XP_003440427	ENSDART00000081143	sephs1	water dikinase 1	GO:0005524,GO:0016310,GO:0004756	NA	NA	M_beryllina_05_2013_comp100573_c0_seq1
M_beryllina_05_2013_comp100578_c0_seq1	CUST_40897_PI429335447	TTCATGGTTAAGGTCGGGTTCCTGAAGACGCAGCACCGCTACGAGATCGTGTTCACGCTG	XP_004079897	ENSDART00000111002	C7H20orf27 (1 of 2)	upf0687 protein c20orf27 homolog	0	NA	NA	M_beryllina_05_2013_comp100578_c0_seq1
M_beryllina_05_2013_comp100580_c0_seq2	CUST_3994_PI429335447	GTAAAGGAAAACTTCCATTTTGCTACAATACCAGAAATGATGGCTTGCAAATGGCTGTAA	XP_004079725	ENSDART00000123808	cdca9	borealin-2 isoform 1	GO:0005694,GO:0007049,GO:0000775,GO:0051301,GO:0007067,GO:0005634	NA	NA	M_beryllina_05_2013_comp100580_c0_seq2
M_beryllina_05_2013_comp100582_c0_seq3	CUST_24184_PI429335447	AACGATGCTATGACTAAACATCTGGCTGTAGAGTGGGGTCCTGATGGAGTTAGAGTGAAT	XP_003961350	ENSDART00000066558	decr2	peroxisomal -dienoyl- reductase	GO:0008670,GO:0005777,GO:0006631,GO:0055114,GO:0000166	NA	NA	M_beryllina_05_2013_comp100582_c0_seq3
M_beryllina_05_2013_comp100583_c0_seq3	CUST_9838_PI429335447	ATATACACCACCTTCAACGTGGAGTTCAGGAAGGCTTTCATCAAGATCTTGCACTGCTAA	XP_004543781	ENSDART00000079507	drd2a	dopamine receptor d2	GO:0042221,GO:0001591,GO:0007195,GO:0030815,GO:0097458,GO:0005887,GO:0007268	NA	NA	M_beryllina_05_2013_comp100583_c0_seq3
M_beryllina_05_2013_comp100587_c0_seq2	CUST_27556_PI429335447	AAAGTAGCCATGATAGCAGCCAGGAAGTCGGGCAAGACCCTGGTGTCCAGCGGGTTCCCC	XP_004556585	NA	NA	---NA---	0	NA	NA	M_beryllina_05_2013_comp100587_c0_seq2
M_beryllina_05_2013_comp100587_c0_seq3	CUST_27559_PI429335447	AACCGCATCCTGCTCCCCTTCGTCCTGCCGGAGGGCGGGTGGGAGGGGGGGGCCGTCCCC	XP_004556587	NA	NA	PREDICTED: uncharacterized protein LOC101476543 isoform X3	GO:0005615	NA	NA	M_beryllina_05_2013_comp100587_c0_seq3
M_beryllina_05_2013_comp100590_c0_seq1	CUST_8953_PI429335447	ACATTATCTACCGTGGGTCATTCTCGTCTTCAACTTCATCATCGGAGGGTCCTTTGTGAA	XP_004086692	ENSDART00000031304	derl1	derlin-1-like isoform 1	GO:0003674,GO:0008150,GO:0005575	NA	NA	M_beryllina_05_2013_comp100590_c0_seq1
M_beryllina_05_2013_comp100600_c1_seq1	CUST_33355_PI429335447	TGCTGAGAGGCTCTGAGAGGAGAGACTCAGCTGTGTATTACTGCGGGGTCAGCCGGGGGT	XP_003452570	NA	NA	secreted immunoglobulin domain 1 protein	GO:0016020	NA	NA	M_beryllina_05_2013_comp100600_c1_seq1
M_beryllina_05_2013_comp100602_c0_seq1	CUST_29470_PI429335447	TTTTCCCGTCTACCACTACAATGGACTTAAACAGTCCAACCACAAAGAGCGGGTTGAGTA	XP_003966140	ENSDART00000059035	fam188a	protein fam188a-like	GO:0005509,GO:0005634,GO:0006915	NA	NA	M_beryllina_05_2013_comp100602_c0_seq1
M_beryllina_05_2013_comp100612_c1_seq2	CUST_26059_PI429335447	ATGAGGAAGAAGCGGTGAAGAAGGAGGATGCCCAGAAGGATGAGTTTAGCTTCCCCTGGA	XP_003449353	NA	NA	PREDICTED: hypothetical protein LOC100702017	0	NA	NA	M_beryllina_05_2013_comp100612_c1_seq2
M_beryllina_05_2013_comp100619_c0_seq3	CUST_42286_PI429335447	CAGCATCCTGCAGATCAAGACCGTCATTGACGAGTGCACCCAGATCATCTCCCAGCGGAA	XP_004571877	ENSDART00000133753	zbtb20	zinc finger and btb domain-containing protein 20-like	GO:0003676,GO:0005634,GO:0008270	NA	NA	M_beryllina_05_2013_comp100619_c0_seq3
M_beryllina_05_2013_comp100628_c0_seq1	CUST_38785_PI429335447	TCTTGTCACTACAGCAGCAACACAAGAAGTACCACGGCTCTCTCATATATGTCACCTTTG	XP_004072554	ENSDART00000045533	tmem127	transmembrane protein 127	GO:0005886,GO:0016021	NA	NA	M_beryllina_05_2013_comp100628_c0_seq1
M_beryllina_05_2013_comp100630_c0_seq1	CUST_42220_PI429335447	TTCTTGGACAAAGCCTTGATCCAGTTCTGTTTTCTCCACATAATACAGGTGAGCTTGATT	XP_004066260	ENSDART00000129690	CR974475.2	zgc:174680 protein	GO:0003676,GO:0015074,GO:0008150,GO:0005575	NA	NA	M_beryllina_05_2013_comp100630_c0_seq1
M_beryllina_05_2013_comp100633_c0_seq1	CUST_20254_PI429335447	ACCTTTACCAGAAAGTTAAGAAGCCAGACTACAAAGTTGCCTATGTTCAGCTGGCACAGG	XP_003440594	ENSDART00000067179	mrpl23	mitochondrial 39s ribosomal protein l23	GO:0005840,GO:0003735,GO:0006412,GO:0005739,GO:0000166,GO:0042254	NA	NA	M_beryllina_05_2013_comp100633_c0_seq1
M_beryllina_05_2013_comp100639_c0_seq1	CUST_19750_PI429335447	ACAGCATTACTTGCCTGTGTCAAAGAAGTAAAAACCCAGCCCAGTGAGCTGACTAGGAAT	XP_004568760	ENSDART00000114383	MESDC1	mesoderm development candidate 1-like	GO:0007016,GO:0005925,GO:0005158,GO:0015629,GO:0003779,GO:0005200,GO:0001726,GO:0005198,GO:0007155,GO:0005856	NA	NA	M_beryllina_05_2013_comp100639_c0_seq1
M_beryllina_05_2013_comp100641_c0_seq1	CUST_14158_PI429335447	ATGACCAAGTGCTGCAACCAGCTGGACATGTGCTACGACACCTGCGGCTCCAACAAGTAC	XP_004065595	ENSDART00000128494	pla2g12b	group xiib secretory phospholipase a2-like	GO:0005576,GO:0005509,GO:0004623,GO:0009395	NA	NA	M_beryllina_05_2013_comp100641_c0_seq1
M_beryllina_05_2013_comp100642_c0_seq5	CUST_13990_PI429335447	TACTTTGTGAACATGTACTGCAGCATCCTCTTTCTGACCAGTATCTGTGTAGACCGGTAC	XP_003444066	ENSDART00000109940	GPR20 (2 of 2)	g-protein coupled receptor 20-like	GO:0004871,GO:0007165	NA	NA	M_beryllina_05_2013_comp100642_c0_seq5
M_beryllina_05_2013_comp100651_c0_seq2	CUST_29719_PI429335447	TTTCTCATATTTTTTGTCCCATGGATGCAGACATTATCAACTGTGGAGAGATTGAGAAAT	XP_004544122	ENSDART00000079855	FAM98C	protein fam98b-like	GO:0003674,GO:0008150,GO:0005575	NA	NA	M_beryllina_05_2013_comp100651_c0_seq2
M_beryllina_05_2013_comp100652_c0_seq2	CUST_18478_PI429335447	TGGAAACCATCGGTGAGGCTGAAGAAGGAGTCCTACTGGGCCTTTTTTGGCCTCTGGGAC	XP_003458522	NA	NA	low choriolytic enzyme-like	GO:0008233	NA	NA	M_beryllina_05_2013_comp100652_c0_seq2
M_beryllina_05_2013_comp100656_c0_seq1	CUST_41335_PI429335447	TAACTCAGACCAAAGTAAGACAGGAAGTGTCCCTGGGAGAACATCAAGTGGGAGTAGTTT	XP_004543034	ENSDART00000081237	si:dkey-208k22.3	vessel-specific 1	GO:0007219	NA	NA	M_beryllina_05_2013_comp100656_c0_seq1
M_beryllina_05_2013_comp100662_c0_seq3	CUST_12043_PI429335447	TTAGCCGGAGCTTATTGTGGATTTTTTAGCTTTGAATCCATTTTAGACTCCAGCAAAAAA	AGO05916	ENSDART00000058699	CR391962.1	fbp32 precursor	GO:0007155,GO:0046872	NA	NA	M_beryllina_05_2013_comp100662_c0_seq3
M_beryllina_05_2013_comp100662_c0_seq4	CUST_19069_PI429335447	TTTTAAGGTCCATTGGAGGAGGACTACGAGACAACTTCGAGACAAGAATGAAGAAGCACG	XP_004573311	ENSDART00000147666	si:dkey-11o15.8	macrophage mannose receptor 1-like	0	NA	NA	M_beryllina_05_2013_comp100662_c0_seq4
M_beryllina_05_2013_comp100671_c1_seq1	CUST_29026_PI429335447	CAAGAAAAAAGACAATCCAAGAATTTTTCCATTCCTGACTGGAGCGCCGAGACTCAGCAG	CBN81792	ENSDART00000101641	prmt6	protein arginine n-methyltransferase 6-like	GO:0060027,GO:0035241,GO:0042393,GO:0034970,GO:0070612,GO:0035242,GO:0070611,GO:0045892,GO:0043985,GO:0019919,GO:0044020,GO:0005634,GO:0006281	NA	NA	M_beryllina_05_2013_comp100671_c1_seq1
M_beryllina_05_2013_comp100677_c1_seq2	CUST_4594_PI429335447	TCAACTAATGGTAGAAGAAAGTGAGGAGCGGCTGTCAGAGGAACAGATTGAAGACCTCAT	ACO08969	ENSDART00000121946	crcp	calcitonin gene-related peptide-receptor component protein	GO:0003899,GO:0006351,GO:0000166,GO:0005730,GO:0006144,GO:0006206	NA	NA	M_beryllina_05_2013_comp100677_c1_seq2
M_beryllina_05_2013_comp100679_c0_seq4	CUST_38233_PI429335447	GTCTGTTCACACACACATACAGGAAACACTGTCGTATCATGTTTGCCCTTACATCCACTT	XP_004070774	ENSDART00000113723	spi1a	transcription factor spi-b-like	0	NA	NA	M_beryllina_05_2013_comp100679_c0_seq4
M_beryllina_05_2013_comp100684_c0_seq1	CUST_32020_PI429335447	GACACAAAAGAACTGGAGAGTTTTATCGACATGTTGGACAGAGAACTCGCCGAGATGTGA	XP_004073410	ENSDART00000140641	si:dkey-27i16.2	response gene to complement 32 protein	GO:0003674,GO:0008150,GO:0005575	NA	NA	M_beryllina_05_2013_comp100684_c0_seq1
M_beryllina_05_2013_comp100689_c2_seq2	CUST_29842_PI429335447	AGGGAGGTGGAGGGCGTCTTCTGGACCTGGATGGACAGTGTGATGGACCAGGAGCTGACT	XP_004570000	ENSDART00000124788	C14orf80	protein jagged-2-like	0	NA	NA	M_beryllina_05_2013_comp100689_c2_seq2
M_beryllina_05_2013_comp100690_c0_seq2	CUST_16420_PI429335447	TTATCAGCAACACGACAATCGGACGGACAATCATCAACATGCTGAAAAAACTGGCCTGGA	AAZ20137	NA	NA	---NA---	0	NA	NA	M_beryllina_05_2013_comp100690_c0_seq2
M_beryllina_05_2013_comp100696_c0_seq1	CUST_20158_PI429335447	AAGTAAACACAGATGACATGGAAGAGAGAGAGGCAACACTTAGCCCAAAGCTTCCTGTCA	XP_004542453	ENSDART00000121872	BX004890.2	microtubule-associated serine threonine-protein kinase 3-like	GO:0016772	NA	NA	M_beryllina_05_2013_comp100696_c0_seq1
M_beryllina_05_2013_comp100705_c0_seq1	CUST_4459_PI429335447	AAACCTCATCTTGTTGAAAGTGCTGCTGTGGTTGGTTCTCCTGGGTCTGTTTGTTGAACT	XP_004550550	ENSDART00000064150	SAYSD1	c6orf64 homolog	0	NA	NA	M_beryllina_05_2013_comp100705_c0_seq1
M_beryllina_05_2013_comp100707_c0_seq1	CUST_16816_PI429335447	ACCTTTGCTATGAAGAGCACAAGCAGTCAGAGAAGCATCACGCAGACTTCTACTACCTAA	AFP20280	ENSDART00000050114	oxtr	isotocin receptor-like	GO:0004990,GO:0005886,GO:0005000,GO:0016021,GO:0007187	NA	NA	M_beryllina_05_2013_comp100707_c0_seq1
M_beryllina_05_2013_comp100714_c0_seq2	CUST_2056_PI429335447	AAGCCCAGATGTTGGACCCTTACCTCATCAAAGGAATGGATGTTTATGGCTATCTGATGG	XP_003448644	ENSDART00000091684	anapc7	anaphase-promoting complex subunit 7	GO:0016740,GO:0016262,GO:0006493	NA	NA	M_beryllina_05_2013_comp100714_c0_seq2
M_beryllina_05_2013_comp100715_c0_seq1	CUST_481_PI429335447	ACCGTGCTTCTGACTGAAAACGAAGACTTTAAGCAGGTGGAACATGTGAGCTGTGTATAG	XP_004562015	ENSDART00000104569	htr2b	5-ht2b serotonin receptor	GO:0080090,GO:0001587,GO:0031328,GO:1901576,GO:0051610,GO:0007610,GO:0030594,GO:0044710,GO:0030285,GO:0005886,GO:0048598,GO:0007187	NA	NA	M_beryllina_05_2013_comp100715_c0_seq1
M_beryllina_05_2013_comp100719_c0_seq2	CUST_14917_PI429335447	TCCTGGAGTCCAATGGTTTTTCAGTGCAGTCTGTTCAAGGAATGCTGTACAACCCGTTAT	XP_004541693	ENSDART00000034109	coq3	hexaprenyldihydroxybenzoate mitochondrial-like	GO:0006744,GO:0008425	NA	NA	M_beryllina_05_2013_comp100719_c0_seq2
M_beryllina_05_2013_comp100721_c1_seq3	CUST_26761_PI429335447	TCCTTTTCATCCAGTTCTTTGAAGCCTGTGCAGAGTTGGTCTTTGAGCATCTCAAAGAGG	XP_003964648	NA	NA	PREDICTED: uncharacterized protein LOC101062169	0	NA	NA	M_beryllina_05_2013_comp100721_c1_seq3
M_beryllina_05_2013_comp100723_c0_seq2	CUST_26293_PI429335447	AGCACTGAAGGAAGCCCCTTCAGGGTGATGCTCATCAACGGCGAGCGGCACAACACGGTG	XP_004571169	NA	NA	PREDICTED: IgGFc-binding protein-like	0	NA	NA	M_beryllina_05_2013_comp100723_c0_seq2
M_beryllina_05_2013_comp100728_c0_seq1	CUST_26500_PI429335447	TTCAAAACACAGCCTGTCACCTTTGCTGAAATCGCTGAAGTGGAAGAAGAAGGTTCGTCT	XP_003455447	NA	NA	PREDICTED: uncharacterized protein C11orf96-like	0	NA	NA	M_beryllina_05_2013_comp100728_c0_seq1
M_beryllina_05_2013_comp100731_c0_seq2	CUST_22264_PI429335447	ATGGGCAGAGTTATGACCCCAGAAGTCATTGATCCGAGTGACCAGGACTTTGACATATAA	XP_003441762	ENSDART00000098299	serpini1	neuroserpin precursor	GO:0004867	NA	NA	M_beryllina_05_2013_comp100731_c0_seq2
M_beryllina_05_2013_comp100735_c0_seq3	CUST_31288_PI429335447	CTGCATGGATACGTCTACATCGGTGACGGGATGAAAAATATAGACCTTCCTTTCATGTTA	XP_003440883	ENSDART00000010903	rsph9	radial spoke head protein 9 homolog	GO:0005856,GO:0035083,GO:0035085,GO:0003341	NA	NA	M_beryllina_05_2013_comp100735_c0_seq3
M_beryllina_05_2013_comp100736_c0_seq1	CUST_24253_PI429335447	AGTAAGTACGATGCTCTGGACTTTGACACCCTGCTGAAGGAGGCGCAGAAGTCCCTGCAG	XP_004073723	ENSDART00000108942	ppargc1b	peroxisome proliferator-activated receptor gamma coactivator 1-alpha-like	GO:0003676,GO:0000166,GO:0007517	NA	NA	M_beryllina_05_2013_comp100736_c0_seq1
M_beryllina_05_2013_comp100741_c0_seq3	CUST_12037_PI429335447	TACTATGGTGTTGTACGCCTTTGGGATAAACGCCAGTCAGAATGCTTGCAATTCTTCCAG	XP_003456721	ENSDART00000043117	fbxw4	f-box wd40-repeat protein	0	NA	NA	M_beryllina_05_2013_comp100741_c0_seq3
M_beryllina_05_2013_comp100742_c0_seq5	CUST_24499_PI429335447	ATCCATGGACCCTGGGATGAGGCCGAGATTCACGAGGATCTAAGCCGTTTCCTTCACTAA	XP_004557270	ENSDART00000010550	pigc	phosphatidylinositol n-acetylglucosaminyltransferase subunit c-like	GO:0006506,GO:0017176,GO:0016021	NA	NA	M_beryllina_05_2013_comp100742_c0_seq5
M_beryllina_05_2013_comp100744_c0_seq1	CUST_40870_PI429335447	GCATAGACCTCTTCTCTTATGGTTCTCATTACTTCCACAAAGTCATCAGGCAGCTTCTGC	XP_003452207	ENSDART00000079716	C1H4orf27	upf0609 protein c4orf27 homolog	GO:0003674,GO:0008150	NA	NA	M_beryllina_05_2013_comp100744_c0_seq1
M_beryllina_05_2013_comp100747_c0_seq1	CUST_41017_PI429335447	TTTGCAGTCCTCAAACCACTCGACACAGTCAAGAGGTCTAAAAGTTACCGAAAGGCCATT	XP_004086851	ENSDART00000066290	UTS2R (1 of 3)	urotensin-2 receptor-like	GO:0001604,GO:0016021,GO:0008217,GO:0007204,GO:0042312,GO:0007187	NA	NA	M_beryllina_05_2013_comp100747_c0_seq1
M_beryllina_05_2013_comp100752_c0_seq2	CUST_29380_PI429335447	AACCTGATCCCCAGCATGACCCGAAGACTGAAGGAGAATTTGGACTCTATACCACAGTGA	XP_004074856	ENSDART00000058724	fam136a	protein fam136a-like	GO:0005739	NA	NA	M_beryllina_05_2013_comp100752_c0_seq2
M_beryllina_05_2013_comp100758_c0_seq2	CUST_25888_PI429335447	AGTGGCGTCCTATGAGAGACCAATGGCGTCCTTAGACAGTCCAGTGGCGTCCTCCGAGCG	XP_003454928	ENSDART00000133676	si:dkey-91i10.2	PREDICTED: hypothetical protein LOC100693730	0	NA	NA	M_beryllina_05_2013_comp100758_c0_seq2
M_beryllina_05_2013_comp100766_c1_seq1	CUST_20674_PI429335447	TTCTATCTGACCATGGGCTTCTTTCCTGCCTCCGTGGTGACCTCCATGAGCAACACGGAG	XP_003442633	ENSDART00000059117	mmd	monocyte to macrophage differentiation protein	GO:0016021,GO:0019835	NA	NA	M_beryllina_05_2013_comp100766_c1_seq1
M_beryllina_05_2013_comp100770_c0_seq1	CUST_29011_PI429335447	ACAAGATGAGGAGGTGTTCTACCCCTTTGGATTCAACGTGCCAGATCCCGCTGTGGCTGC	XP_004084094	NA	NA	protein app1-like	0	NA	NA	M_beryllina_05_2013_comp100770_c0_seq1
M_beryllina_05_2013_comp100789_c0_seq1	CUST_26590_PI429335447	AAGGACCTGCATTTGAGACAGCGTTTGCTCCTTCAAGTCCCCGATCATTGTTTCAAATGA	XP_004547502	ENSDART00000046159	C11H1orf158	PREDICTED: uncharacterized protein C1orf158 homolog	0	NA	NA	M_beryllina_05_2013_comp100789_c0_seq1
M_beryllina_05_2013_comp100791_c0_seq1	CUST_38098_PI429335447	AGCAGCTTCCAGATGAACGGCAAGGCCCTGCTGCTGCTCACCAAGGAGGACTTCCGCTAC	CAF96303	ENSDART00000100501	ETV7 (1 of 2)	transcription factor etv6-like	GO:0003700,GO:0043565,GO:0006355,GO:0005667,GO:0045449	NA	NA	M_beryllina_05_2013_comp100791_c0_seq1
M_beryllina_05_2013_comp100793_c0_seq1	CUST_29482_PI429335447	ATCCTGAATAGTCTGGAGAATCTGGACTCCTGCGATCTGGCCGACGACGACCTGATGCTG	XP_004565343	NA	NA	protein fam190b-like	0	NA	NA	M_beryllina_05_2013_comp100793_c0_seq1
M_beryllina_05_2013_comp100795_c0_seq1	CUST_27544_PI429335447	TTCAAATCCCACAGTACAGGAATCTATTGAGGGTTCCATTAATGCTCCTGGACCTTCGCT	XP_004574458	NA	NA	PREDICTED: uncharacterized protein LOC101475844	0	NA	NA	M_beryllina_05_2013_comp100795_c0_seq1
M_beryllina_05_2013_comp100800_c0_seq2	CUST_20698_PI429335447	TTACAAATTTGAGAGGCCACAGTATGCAGACATCCTGGCCAACCATCCTGATACATCCAT	XP_003440502	ENSDART00000139441	morf4l1	mortality factor 4-like protein 1	GO:0005634	NA	NA	M_beryllina_05_2013_comp100800_c0_seq2
M_beryllina_05_2013_comp100802_c0_seq1	CUST_20059_PI429335447	AAAGTCATGCAGGTGAAAAACTTTGGCCGGTCGGGACGCACCAAGTACACGCACCTGGTG	AAH52118	ENSDART00000028105	mfap1	---NA---	0	NA	NA	M_beryllina_05_2013_comp100802_c0_seq1
M_beryllina_05_2013_comp100804_c0_seq1	CUST_37138_PI429335447	AACGACAACGTTTTCCACATTGCTGCCACGGTGCTGGGCCTGGCCTTCACACAGATTGGA	CAG02436	NA	NA	tetraspanin-7-like	GO:0016021,GO:0016020,GO:0003674,GO:0008150,GO:0035188	NA	NA	M_beryllina_05_2013_comp100804_c0_seq1
M_beryllina_05_2013_comp100813_c1_seq2	CUST_22237_PI429335447	AGCATTGACCACTACAACATCTTCTCCAGCATCTATTTCCTGACGGTGATGAGCATCGAT	XP_003977607	ENSDART00000044733	NPBWR2 (1 of 2)	neuropeptides b w receptor type 1-like	GO:0008188,GO:0016021,GO:0007218,GO:0007187,GO:0007268	NA	NA	M_beryllina_05_2013_comp100813_c1_seq2
M_beryllina_05_2013_comp100814_c0_seq2	CUST_22_PI429335447	GGATTCAACACTTATCATGCAGTTGCTGCGTGACAACTTGACACTATGGACCTCAGATGT	XP_003453757	ENSDART00000011303	ywhae2	14-3-3 protein epsilon	GO:0004497,GO:0019904	NA	NA	M_beryllina_05_2013_comp100814_c0_seq2
M_beryllina_05_2013_comp100819_c0_seq1	CUST_32824_PI429335447	AAACAAACAAGAGGACTGTGTTGTTGTATGGGGAGAGTGCAACCACTCTTTCCACAACTG	XP_003441673	ENSDART00000077895	rnf7	ring-box protein 2	GO:0004842,GO:0016567,GO:0008270	NA	NA	M_beryllina_05_2013_comp100819_c0_seq1
M_beryllina_05_2013_comp100822_c1_seq2	CUST_38542_PI429335447	CAAGTTTTGTTTTTCACCGTCCTCTGCCTCTCGGTTACTAGGAAAGCCCTACAAAATTGA	XP_003458806	ENSDART00000142488	TACO1 (1 of 2)	translational activator of cytochrome c oxidase 1-like	0	NA	NA	M_beryllina_05_2013_comp100822_c1_seq2
M_beryllina_05_2013_comp100828_c0_seq1	CUST_12832_PI429335447	TTTTGAAGTGGCGTCTCTGCCACTGGTTGAGATGGATGCTTTGGAGAAAGCTTTAACCAT	BAD52075	ENSDART00000122449	ccnb3	g2 mitotic-specific cyclin-b3	GO:0000079,GO:0010389,GO:0019901,GO:0005634,GO:0051301	NA	NA	M_beryllina_05_2013_comp100828_c0_seq1
M_beryllina_05_2013_comp100830_c0_seq1	CUST_14404_PI429335447	AGCGGAAAAACATCGTAACCAGCGACGAAAAGATCCAGAAGGAACGCCGTATATTAACCA	XP_003456938	ENSDART00000032324	hddc3	guanosine-3 -bis 3 -pyrophosphohydrolase mesh1-like	GO:0008893,GO:0046872,GO:0008081,GO:0006144	NA	NA	M_beryllina_05_2013_comp100830_c0_seq1
M_beryllina_05_2013_comp100838_c0_seq2	CUST_25225_PI429335447	AAGTTCAACTCTAGCTGGGAAAGATAAGACAAAACTCACTCTTCAGAAGTTCGTCCGCTG	XP_004084869	ENSDART00000129432	pcgf1	polycomb group ring finger protein 1-like	GO:0031519,GO:0008270,GO:0006355,GO:0044699	NA	NA	M_beryllina_05_2013_comp100838_c0_seq2
M_beryllina_05_2013_comp100843_c0_seq1	CUST_24895_PI429335447	ACCATCATGAATATGGCTCGGTAAAGTACGCCGATCTCAACGGGGAGCACCCTGAAGGGG	XP_004538828	ENSDART00000129504	si:dkey-237i9.8	platelet endothelial cell adhesion molecule-like	0	NA	NA	M_beryllina_05_2013_comp100843_c0_seq1
M_beryllina_05_2013_comp100849_c0_seq3	CUST_37189_PI429335447	TTTTGGTCCTTCTGCGAAATTCAGGAAACCCTCAGGTTGAATACATCATCCGAGCTCTGA	XP_004539302	ENSDART00000032494	ttc26	tetratricopeptide repeat protein 26- partial	GO:0005929,GO:0042384,GO:0039023,GO:0035845,GO:0008594	NA	NA	M_beryllina_05_2013_comp100849_c0_seq3
M_beryllina_05_2013_comp100852_c0_seq1	CUST_31822_PI429335447	TTCACAGGCGAATGTGGAAGCTGGAGGTGGAGGACCTGCAGCACATGCTGGCTTTAACGT	XP_003442106	ENSDART00000109622	RMI2	recq-mediated genome instability protein 2-like	GO:0003677	NA	NA	M_beryllina_05_2013_comp100852_c0_seq1
M_beryllina_05_2013_comp100853_c1_seq5	CUST_40306_PI429335447	TACAAAAAGAACTTGAAGAGGAGTCTCCGATCATCAACTGGTCTCTAGAGCTCGGGACAA	XP_003963998	ENSDART00000092113	zranb1b	ubiquitin thioesterase zranb1-like	GO:0016477,GO:0004221,GO:0008234,GO:0008270,GO:0022604,GO:0030177,GO:0007010,GO:0070536,GO:0021551,GO:0005737,GO:0005634,GO:0006511	NA	NA	M_beryllina_05_2013_comp100853_c1_seq5
M_beryllina_05_2013_comp100855_c0_seq1	CUST_6778_PI429335447	TCTTCTGGAAAAGACGGTAAACAGAGTGATTCTATGGCATCAGCGAAGGAGGGAACAAAA	XP_004558882	ENSDART00000047015	CCDC115	coiled-coil domain-containing protein 115	GO:0044444,GO:0043231	NA	NA	M_beryllina_05_2013_comp100855_c0_seq1
M_beryllina_05_2013_comp100858_c0_seq1	CUST_17932_PI429335447	TATGTTTGGGTGGTTCACCATGGTCATCTCCTACCTAGTCTACTATGTCAGGGCTAATCA	CBN81262	ENSDART00000108482	NA	leucine-rich repeat-containing protein 3b-like	GO:0016021,GO:0016020,GO:0008150	NA	NA	M_beryllina_05_2013_comp100858_c0_seq1
M_beryllina_05_2013_comp100863_c0_seq1	CUST_6436_PI429335447	TGTTCTGCTCCCTGTCCTCCGGGTTCTTCTTCTTCAACGCGTTCGGGCGGCCCTACGAGA	XP_004572627	ENSDART00000062909	clrn1	clarin 1	GO:0003674,GO:0005575	NA	NA	M_beryllina_05_2013_comp100863_c0_seq1
M_beryllina_05_2013_comp100867_c0_seq1	CUST_41245_PI429335447	AGGGTGTTCACGGATAAAGACCATCCCGACCATTCCGGGTATCCCCACCATTCTGGGTAC	XP_004085316	ENSDART00000012522	vcanb	---NA---	0	NA	NA	M_beryllina_05_2013_comp100867_c0_seq1
M_beryllina_05_2013_comp100869_c0_seq1	CUST_8098_PI429335447	CTCGAGCTAAGCAATATTCAGCACTCCAAAAGCCACCATGATCCAATTGAGTACTTCTAA	XP_004081113	ENSDART00000037224	zgc:56530	cystatin b	GO:0004869,GO:0005622,GO:0010951	NA	NA	M_beryllina_05_2013_comp100869_c0_seq1
M_beryllina_05_2013_comp100870_c0_seq2	CUST_25612_PI429335447	AAAGTCAAGTGACCTAAGTAAACAGGCAGACTCTCCTGTGGATTCAGAGATCACTGAGGA	XP_004541341	NA	NA	pre-b-cell leukemia transcription factor-interacting protein 1-like isoform x3	0	NA	NA	M_beryllina_05_2013_comp100870_c0_seq2
M_beryllina_05_2013_comp100882_c0_seq1	CUST_34303_PI429335447	TCTCCCTCAGGAACATGAGTCTGTGTGTGGTGGACGGGGTGAAAGAGATGTGGCACAGAC	XP_004543698	ENSDART00000073642	SH2B2	sh2b adapter protein 2-like	GO:0035556,GO:0004871,GO:0005543	NA	NA	M_beryllina_05_2013_comp100882_c0_seq1
M_beryllina_05_2013_comp100888_c0_seq2	CUST_11398_PI429335447	TGACAAGAAGAAGCTAGTCAAGGCCTTCAAGAAGAAGTTTGCCTGCAATGGGACAGTGAT	XP_004071194	ENSDART00000009132	eif1b	eukaryotic translation initiation factor 1b	GO:0003743,GO:0005840,GO:0006446	NA	NA	M_beryllina_05_2013_comp100888_c0_seq2
M_beryllina_05_2013_comp100891_c0_seq2	CUST_247_PI429335447	TTCTACTTTGTGTTCATGAACGTGCTGTGGATCGTCATACCTCTGGTGCTCATTGTGGAT	XP_004070524	ENSDART00000019045	ebp	3-beta-hydroxysteroid-delta -isomerase-like	GO:0047750,GO:0016125,GO:0016021,GO:0005783,GO:0006694	NA	NA	M_beryllina_05_2013_comp100891_c0_seq2
M_beryllina_05_2013_comp100895_c1_seq5	CUST_3676_PI429335447	CATTCAGAACAGCATCGATCGTAACCGGATCAGGGATCCGACTGTCCCACGCAGAGGGAA	XP_004083348	ENSDART00000111165	best2	bestrophin-3-like isoform x3	0	NA	NA	M_beryllina_05_2013_comp100895_c1_seq5
M_beryllina_05_2013_comp100895_c1_seq6	CUST_3673_PI429335447	TCTGCAGAATATTCTGAATGAGATGAATGTGTTCAGGACGTGGTGTGCGACTCTTTTCGG	XP_004083348	ENSDART00000110077	best1	bestrophin-3-like isoform x1	0	NA	NA	M_beryllina_05_2013_comp100895_c1_seq6
M_beryllina_05_2013_comp100899_c0_seq1	CUST_18016_PI429335447	TATCCTTAAAGACATTACCGAAATGCTCAAAGAGCCCAAGAACTTCTCCAGCCTTGCGTG	XP_003445701	ENSDART00000111506	fam211ba	leucine-rich repeat-containing protein fam211a-like	0	NA	NA	M_beryllina_05_2013_comp100899_c0_seq1
M_beryllina_05_2013_comp100902_c0_seq2	CUST_28345_PI429335447	TCTTATTTACCGAAAAGTGGATGACAATAACTACTGTACAGAAGATACCAGCTCGGCTTT	XP_004069288	ENSDART00000079715	GPR25	probable g-protein coupled receptor 25-like	GO:0008078,GO:0055113,GO:0060182,GO:0007186,GO:0048738,GO:0016020	NA	NA	M_beryllina_05_2013_comp100902_c0_seq2
M_beryllina_05_2013_comp100911_c0_seq1	CUST_15772_PI429335447	TATTACTCCCAATCAGTCAAAGGACGATTCACCATCTCCAGAGATGACTCCAGCAGCAAA	ACR54293	ENSDART00000151628	ighv6-1	ig heavy chain v-iii region vh26-like	0	NA	NA	M_beryllina_05_2013_comp100911_c0_seq1
M_beryllina_05_2013_comp100912_c0_seq1	CUST_31495_PI429335447	TACGTGGAGACGTCCGCCAAGACCCGCGCCAACGTGGACAAGGTGTTCTTTGACCTGATG	XP_003966632	ENSDART00000066863	ralaa	ras-related protein o-ral-like	GO:0001525,GO:0007264,GO:0006184,GO:0003924,GO:0016020,GO:0005525	NA	NA	M_beryllina_05_2013_comp100912_c0_seq1
M_beryllina_05_2013_comp100914_c2_seq1	CUST_31789_PI429335447	TCCACCTTCTGGCCCAACTCTTACCAGGTGATCTTCGAGGCCGTTTCCGTTCAGGGACAT	XP_003447739	ENSDART00000108571	ptprt	receptor-type tyrosine-protein phosphatase t-like	GO:0016311,GO:0016791	NA	NA	M_beryllina_05_2013_comp100914_c2_seq1
M_beryllina_05_2013_comp100916_c1_seq2	CUST_13636_PI429335447	AGATATGGCCCAACAGATGATCCTTATGTTGTGAAGAAGGACTTGCCCACTTACCTGTAA	ACR33822	ENSDART00000113589	gpx4b	glutathione peroxidase 4b	GO:0004602,GO:0006979,GO:0055114,GO:0006749,GO:0006804	NA	NA	M_beryllina_05_2013_comp100916_c1_seq2
M_beryllina_05_2013_comp100919_c0_seq1	CUST_18814_PI429335447	AAGTATCTGCAAGTTTGTTGGACCCCTCAACTACTCTCGTCTGAAACATCTTCGTCTGGA	XP_003444990	ENSDART00000139919	lum	lumican precursor	GO:0030199,GO:0048596	NA	NA	M_beryllina_05_2013_comp100919_c0_seq1
M_beryllina_05_2013_comp100922_c0_seq1	CUST_26806_PI429335447	AACAAGCGATGGATGATTGCTATCAAAGCTTCGGTGAAGAAGTGGCTGCCTTTACATCAG	XP_004075181	ENSDART00000003775	si:dkeyp-35f12.3	PREDICTED: uncharacterized protein LOC101154883	0	NA	NA	M_beryllina_05_2013_comp100922_c0_seq1
M_beryllina_05_2013_comp100922_c0_seq4	CUST_23923_PI429335447	TCGGGTGTACTTTCTCTGTGCGACTTCAAACCAAGAAATGAAAAGGTGGCTGGAAGCTAT	XP_004564637	ENSDART00000003775	si:dkeyp-35f12.3	pdlim7 protein	GO:0003190,GO:0001947,GO:0003294,GO:0031941,GO:0048471,GO:0001756	NA	NA	M_beryllina_05_2013_comp100922_c0_seq4
M_beryllina_05_2013_comp100924_c0_seq1	CUST_40000_PI429335447	AGAAGAACCGATACAGAGACATCCTGCCATATGACCAGACCCGTGTGGTGCTGTCCCTGC	XP_003446042	ENSDART00000132158	ptpn18	tyrosine-protein phosphatase non-receptor type 18-like	GO:0016787	NA	NA	M_beryllina_05_2013_comp100924_c0_seq1
M_beryllina_05_2013_comp100932_c1_seq1	CUST_17971_PI429335447	GATCCCTATTTCATAAAGACTACACATGGCAAGGAAAAGGTTCAGGAGACCCAAATCTGA	XP_004553352	ENSDART00000007520	lrrc4.2	leucine-rich repeat-containing protein 4-like	GO:0005515	NA	NA	M_beryllina_05_2013_comp100932_c1_seq1
M_beryllina_05_2013_comp100936_c0_seq1	CUST_17293_PI429335447	GTAAATAACCAAATGGCAACTCCTGACATGATCCCAACAGTGTCTATCTCCATTCCACTT	XP_004548229	ENSDART00000080842	kitlgb	kit ligand	GO:0044763	NA	NA	M_beryllina_05_2013_comp100936_c0_seq1
M_beryllina_05_2013_comp100938_c0_seq1	CUST_25579_PI429335447	CAATCAGCGTGAGCAAAAAAGCGCATTTTGTAAACCGAGCAAAAGAACTTCCCTTCTGGA	XP_003441142	ENSDART00000030946	prdm8	pr domain zinc finger protein 8-like	GO:0009987,GO:0008270,GO:0005622	NA	NA	M_beryllina_05_2013_comp100938_c0_seq1
M_beryllina_05_2013_comp100944_c0_seq3	CUST_12448_PI429335447	GTGTGAACAAATCTGGTCCAATTCTTACCTTTACACCACACACACCAAAAACTCTGGGCG	ACQ58933	ENSDART00000112934	FOLR1	folate receptor alpha precursor	GO:0003674,GO:0008150,GO:0005575	NA	NA	M_beryllina_05_2013_comp100944_c0_seq3
M_beryllina_05_2013_comp100947_c1_seq1	CUST_33484_PI429335447	TGTAGAGGAGGCGTGCAGCAGTCTGTCATCAACACACCGGAAATTACCCACAGCCTCCTG	XP_004561047	ENSDART00000090081	sema4ab	semaphorin-4b-like isoform x1	GO:0004872,GO:0016021,GO:0007275,GO:0016020	NA	NA	M_beryllina_05_2013_comp100947_c1_seq1
M_beryllina_05_2013_comp100949_c0_seq3	CUST_26491_PI429335447	TTCCATTTTTATTCAAAAGCCCTGAAAATTAATCTGGAAGAAAAGCTGCCGTCAGGGTCA	XP_004554394	NA	NA	PREDICTED: uncharacterized protein C11orf85 homolog	0	NA	NA	M_beryllina_05_2013_comp100949_c0_seq3
M_beryllina_05_2013_comp100954_c0_seq1	CUST_41308_PI429335447	CTCCTCGTCGTCATAGCAGCCATTTTCATTGGATTTTTCTTGGGGAAGTTCATCTTGTAG	XP_003448513	ENSDART00000098173	vapal	vesicle-associated membrane protein-associated protein a	GO:0005198	NA	NA	M_beryllina_05_2013_comp100954_c0_seq1
M_beryllina_05_2013_comp100955_c1_seq3	CUST_1729_PI429335447	AGATTAGTAGGTTTAATCTGTGAACCTGCCCACTTCCGCTTCATCAACAACAAGGATGCT	XP_004539321	ENSDART00000126107	NA	alpha- -mannosylglycoprotein 6-beta-n-acetylglucosaminyltransferase b-like	GO:0030144,GO:0006487	NA	NA	M_beryllina_05_2013_comp100955_c1_seq3
M_beryllina_05_2013_comp100967_c0_seq1	CUST_31585_PI429335447	AAGCAGGTCTTTGACAAGCTAGCAGACGTCATTTGTGAGAAAATGAACGAGACGGTCAAC	XP_004065737	ENSDART00000023757	rab3da	ras-related protein rab-3d-like	GO:0005525,GO:0016787,GO:0007264,GO:0015031	NA	NA	M_beryllina_05_2013_comp100967_c0_seq1
M_beryllina_05_2013_comp100968_c0_seq12	CUST_40012_PI429335447	TTTGGTGTACCAGAATCCCCTGCTTCTTTCCTCAACTTCCTCTTCAAAGTTCGAGAGTCA	CAG05023	ENSDART00000104037	ptpn2a	tyrosine-protein phosphatase non-receptor type 2-like	GO:0006470,GO:0004725,GO:0006570	NA	NA	M_beryllina_05_2013_comp100968_c0_seq12
M_beryllina_05_2013_comp100978_c0_seq1	CUST_30166_PI429335447	AATGGGCTGCTCTACAGGATAAAGGGTTTACGCAAAATGTCTGGTCCCTTGAAGAAATAA	XP_003962633	ENSDART00000115330	ppp1r14c	protein phosphatase 1 regulatory subunit 14b-like	GO:0005737,GO:0042325	NA	NA	M_beryllina_05_2013_comp100978_c0_seq1
M_beryllina_05_2013_comp100979_c0_seq1	CUST_16489_PI429335447	TCAATGACCCTGACAAACGATGTCACAGACATTTGCCAGTTTAGAGTGAAGAGCAAGGCT	XP_004073574	ENSDART00000047524	il12ba	interleukin-12 subunit beta-like	GO:0003674,GO:0008150,GO:0005575	NA	NA	M_beryllina_05_2013_comp100979_c0_seq1
M_beryllina_05_2013_comp100985_c0_seq1	CUST_571_PI429335447	AGTTCTCCAAAAGGTACCTGAAGTACCTGACCAAGAAGTACCTGAAGAAGAACAACCTCC	XP_004080856	ENSDART00000129461	rpl22l1	60s ribosomal protein l22-like 1-like	GO:0005840,GO:0003735,GO:0016787,GO:0006412,GO:0042254	NA	NA	M_beryllina_05_2013_comp100985_c0_seq1
M_beryllina_05_2013_comp100985_c0_seq2	CUST_568_PI429335447	AGGTACTTGAAGTATCTCACGAAGAAGTACCTGAAAAAGAACAACCTCAGGGACTGGCTG	BAF98670	ENSDART00000125753	rpl22	60s ribosomal protein l22	GO:0005840,GO:0003735,GO:0006412,GO:0042254	NA	NA	M_beryllina_05_2013_comp100985_c0_seq2
M_beryllina_05_2013_comp100999_c0_seq1	CUST_3070_PI429335447	AATCCTCTTTGATGCTAAGAGGAACAATGTGTCCATGCTGTTGGAGACCAACTACAGGGA	ACQ58228	ENSDART00000009682	atp5f1	atp synthase subunit mitochondrial precursor	GO:0015078,GO:0000276,GO:0015986	NA	NA	M_beryllina_05_2013_comp100999_c0_seq1
M_beryllina_05_2013_comp101001_c0_seq2	CUST_19789_PI429335447	ATGAAATGAAGGTTAAAATATCACCTCAGCTTCTGCTGGCTGCCCTGCGTTTCCTAGCAA	XP_003453832	ENSDART00000087001	cnnm2a	metal transporter cnnm1-like	GO:0003674,GO:0008150,GO:0005575	NA	NA	M_beryllina_05_2013_comp101001_c0_seq2
M_beryllina_05_2013_comp101003_c0_seq1	CUST_39685_PI429335447	AACATGTCCCAACTTATTCGATACAAACCCTCTGAAAATGTTTTCGGCGCATATATGATA	XP_003442020	ENSDART00000112238	TNFSF14	tumor necrosis factor ligand superfamily member 14-like	GO:0005102,GO:0007165	NA	NA	M_beryllina_05_2013_comp101003_c0_seq1
M_beryllina_05_2013_comp101004_c0_seq3	CUST_40627_PI429335447	ACAAATCTAAACCAGTCCTTCCAAAGCATCTGCTGAACGTGAAGTCCCTGAAGTACCTCA	XP_003450805	ENSDART00000028997	CU633744.1	unconventional myosin-ixa-like isoform x3	0	NA	NA	M_beryllina_05_2013_comp101004_c0_seq3
M_beryllina_05_2013_comp101010_c1_seq1	CUST_4039_PI429335447	AAACCTTGCCTCTATTATGTCCTTCCAGAGTAACACAACGCTGATCAACTCCAAGGTGGT	XP_004549074	ENSDART00000109554	BAI1 (3 of 3)	brain-specific angiogenesis inhibitor 1-like	GO:0007165	NA	NA	M_beryllina_05_2013_comp101010_c1_seq1
M_beryllina_05_2013_comp101011_c0_seq1	CUST_14026_PI429335447	TGTTCATGGAGAACAAAGCCTTCTCCATGGACGAGCCCGGACAAGGGTCTAAGCCGGTGT	XP_003961142	ENSDART00000130259	gprc5c	g-protein coupled receptor family c group 5 member c-like	GO:0044699,GO:0016020	NA	NA	M_beryllina_05_2013_comp101011_c0_seq1
M_beryllina_05_2013_comp101027_c0_seq4	CUST_6598_PI429335447	TACTCCTGGTTGATCAACACTCTGGTAACGGGTGTGTATGCATTTGGATTCCTGTCTATG	XP_004565220	ENSDART00000004585	clptm1l	cleft lip and palate transmembrane protein 1-like	GO:0016020	NA	NA	M_beryllina_05_2013_comp101027_c0_seq4
M_beryllina_05_2013_comp101031_c0_seq1	CUST_35422_PI429335447	CGGTTCCGGTACGTGCTGACCTCCAGCTTTCAGAGCGTCAAACGGGACTTCAGCGACTCC	ABR10399	NA	NA	SOX11b	0	NA	NA	M_beryllina_05_2013_comp101031_c0_seq1
M_beryllina_05_2013_comp101032_c0_seq2	CUST_3577_PI429335447	AGAACTAGATGAATCGGGAGCACCTCCCTTAAAGAGGATTTGCACAGGAGAAAATGCTGT	XP_003441675	ENSDART00000030687	bcl7ba	b-cell cll lymphoma 7 protein family member b-b-like	GO:0003674,GO:0008150,GO:0005575	NA	NA	M_beryllina_05_2013_comp101032_c0_seq2
M_beryllina_05_2013_comp101042_c2_seq2	CUST_3058_PI429335447	TCTGAAGACCTGAATGAAACTGAAGCTCTTCTGTACATTATTGCTGGCAATCAAGGGGGG	XP_004071933	ENSDART00000135065	atp5g3b	atp synthase lipid-binding mitochondrial precursor	GO:0015078,GO:0016021,GO:0015986,GO:0008289,GO:0045263,GO:0015991	NA	NA	M_beryllina_05_2013_comp101042_c2_seq2
M_beryllina_05_2013_comp101046_c1_seq2	CUST_12082_PI429335447	AGATCAGACTCTAGTTCAGCCTCTAGATCAGAATCTGGTTCAGAATCAGGTTCAGCCTCT	XP_004538881	NA	NA	ferm and pdz domain-containing protein 1-like	0	NA	NA	M_beryllina_05_2013_comp101046_c1_seq2
M_beryllina_05_2013_comp101055_c0_seq2	CUST_25201_PI429335447	TTTTGGCTTTGTTTGCTTCTCTTCGCCAGAGGAGGCCACTAAAGCAGTTACTGAGATGAA	XP_004560096	ENSDART00000148392	pabpc1a	polyadenylate-binding protein 1-like	GO:0003723,GO:0007507,GO:0000166	NA	NA	M_beryllina_05_2013_comp101055_c0_seq2
M_beryllina_05_2013_comp101058_c1_seq1	CUST_19990_PI429335447	ATTTTCTCCTGAGGAAATCCCCGTCAGCCCAGTTCTGGACCACCTACCAGCTGAGGAGTG	XP_003442492	NA	NA	methyltransferase-like protein 23-like	0	NA	NA	M_beryllina_05_2013_comp101058_c1_seq1
M_beryllina_05_2013_comp101059_c0_seq1	CUST_22816_PI429335447	CAGGAAGTGGCTCAACTCAAGAGGCTCTTTTCTAATCAGCTGCATTCTAAGATCTCTTAA	XP_004538955	ENSDART00000127604	nfil3-6	nuclear factor interleukin-3-regulated	GO:0003700,GO:0043565,GO:0006355,GO:0005667,GO:0045449	NA	NA	M_beryllina_05_2013_comp101059_c0_seq1
M_beryllina_05_2013_comp101060_c1_seq1	CUST_28573_PI429335447	TTTAGTTGATGTGCGTCACGTTTCCGTGTACGGCAGCGTTTATGCCATAGCAGATATATC	CBN81541	ENSDART00000026765	slc18a3a	probable vesicular acetylcholine transporter-a-like	GO:0016021,GO:0015238,GO:0015893,GO:0006836,GO:0055085	NA	NA	M_beryllina_05_2013_comp101060_c1_seq1
M_beryllina_05_2013_comp101064_c0_seq1	CUST_28687_PI429335447	TGTGGCTCCACACGCTGCTGCTCTGCAAGGCCCTGAAGTTCCTCCACAAACTTTTCTGCT	XP_004550599	ENSDART00000062347	gpr176	prolactin-releasing peptide receptor	GO:0016021,GO:0007186,GO:0004930	NA	NA	M_beryllina_05_2013_comp101064_c0_seq1
M_beryllina_05_2013_comp101064_c2_seq2	CUST_28333_PI429335447	AAAGGTGAAGTGAACACAAAAATGGACTCTGGAGCAGTGGTCATCACTAAGGAAGTGCCT	XP_003446377	ENSDART00000062347	gpr176	probable g-protein coupled receptor 176-like	GO:0016021,GO:0007186,GO:0004930	NA	NA	M_beryllina_05_2013_comp101064_c2_seq2
M_beryllina_05_2013_comp101069_c1_seq1	CUST_16048_PI429335447	CCTTTTAAATTCAGTGATGCTGAAGCCAAAGCTGTTGTCCAGACGGCTCCTGAATTTGGT	XP_003452282	ENSDART00000023904	ppa2	inorganic pyrophosphatase	GO:0004427,GO:0005737,GO:0000287,GO:0006119	NA	NA	M_beryllina_05_2013_comp101069_c1_seq1
M_beryllina_05_2013_comp101083_c0_seq2	CUST_34930_PI429335447	AAATTGAACCGCTTTAACAAGAAATATGTGAAGAAGTGCCTCATAGCAGGCGAGCGTTCC	XP_003450603	ENSDART00000097631	SLC9A1	sodium hydrogen exchanger 1	GO:0016323,GO:0015385,GO:0055085,GO:0006885,GO:0016021,GO:0006814,GO:0015992	NA	NA	M_beryllina_05_2013_comp101083_c0_seq2
M_beryllina_05_2013_comp101083_c2_seq1	CUST_34933_PI429335447	TACAATCTTGATGTTTGCTGTTGTGGGGACTTTGTGGAATGCCTTCTTCATTGGGGGTCT	XP_003965701	ENSDART00000097631	SLC9A1	sodium hydrogen exchanger 1-like	GO:0016323,GO:0015385,GO:0055085,GO:0006885,GO:0016021,GO:0006814,GO:0015992	NA	NA	M_beryllina_05_2013_comp101083_c2_seq1
M_beryllina_05_2013_comp101085_c0_seq1	CUST_169_PI429335447	CAAAAGTCAAAGGAACGCTACATGAAGCTTCATCTGGAGGGTAAAACTGATCAGGCAAGG	AAH52972	ENSDART00000066393	pdap1a	28 kda heat- and acid-stable phospho	GO:0003674,GO:0008150,GO:0005575	NA	NA	M_beryllina_05_2013_comp101085_c0_seq1
M_beryllina_05_2013_comp101090_c0_seq1	CUST_35344_PI429335447	ACTATAAGATATTCCTACATACCAACAGCAAAGCCTTCACCGCTAAGACCTCGTGTGTGC	XP_004565903	ENSDART00000105361	snx11	sorting nexin 11	GO:0007154,GO:0035091	NA	NA	M_beryllina_05_2013_comp101090_c0_seq1
M_beryllina_05_2013_comp101133_c0_seq1	CUST_32725_PI429335447	GTTGAAGAGCGCGTTAGACAACTTCCATGCAATCACTTGTTTCACAATGACTGCATAGTG	XP_004079240	ENSDART00000123386	rnf126	ring finger protein 126-like	GO:0008270	NA	NA	M_beryllina_05_2013_comp101133_c0_seq1
M_beryllina_05_2013_comp101134_c0_seq2	CUST_28963_PI429335447	TACATCTACGGCTTCATGGACTCCAACTACAGACCCGGCATGACCAAGGACCAGTGCCTG	XP_003456484	ENSDART00000024082	psmb6	proteasome subunit beta type-6 precursor	GO:0005737,GO:0005839,GO:0005634,GO:0004298,GO:0051603	NA	NA	M_beryllina_05_2013_comp101134_c0_seq2
M_beryllina_05_2013_comp101138_c0_seq3	CUST_41806_PI429335447	AGTTTAATCCCAGATACATGACCTTTGCCAGTGCCTGCACAAACATGACTTTTTGGCTCC	XP_004086158	ENSDART00000007353	wdr82	wd repeat-containing protein 82	GO:0003779,GO:0005634	NA	NA	M_beryllina_05_2013_comp101138_c0_seq3
M_beryllina_05_2013_comp101147_c0_seq2	CUST_10555_PI429335447	ATTTCGAACCAAATGATGATGAATCTGAAGCTCCAGACCACAGCAAACCTGCAGGATGGA	XP_004078440	NA	NA	echicetin subunit beta-like	0	NA	NA	M_beryllina_05_2013_comp101147_c0_seq2
M_beryllina_05_2013_comp101147_c2_seq1	CUST_19075_PI429335447	AAAGATTACTGCTCAGACAAGTACACTTCCCTGATCACAGTGGACAGTTCCTCTGTCAAC	XP_001342326	ENSDART00000134167	si:dkey-11o15.7	macrophage mannose receptor 1-like protein 1-like isoform 1	0	NA	NA	M_beryllina_05_2013_comp101147_c2_seq1
M_beryllina_05_2013_comp101156_c0_seq1	CUST_5437_PI429335447	TGAAGGACCTTATTGAGGCCAAAGAGAAGGCAACTTATAAGAGAGTGACCAGATCCAGCA	ACQ58688	ENSDART00000061311	si:dkeyp-59a8.2	c-c motif chemokine 14 precursor	GO:0008009,GO:0005125,GO:0005615,GO:0006955,GO:0005576	NA	NA	M_beryllina_05_2013_comp101156_c0_seq1
M_beryllina_05_2013_comp101165_c0_seq1	CUST_1474_PI429335447	ATCTCAAAGGTGGAAGTGGAAGACTTCATCAGATACAAAAACCTGCAGAGGTTGGGACTG	XP_004086170	ENSDART00000064798	aspn	af247821_1biglycan-like protein 3	GO:0008150	NA	NA	M_beryllina_05_2013_comp101165_c0_seq1
M_beryllina_05_2013_comp101170_c1_seq2	CUST_39436_PI429335447	ACCTGCCGGGCCGGACTCAGACACCGCCCAGAGGCCCGGAGACAGCTGCAGCCAATGGGA	ACO09427	NA	NA	trna-splicing endonuclease subunit sen34	GO:0003676,GO:0006388,GO:0000213,GO:0090305,GO:0004518	NA	NA	M_beryllina_05_2013_comp101170_c1_seq2
M_beryllina_05_2013_comp101176_c0_seq1	CUST_10117_PI429335447	TTTCCATCGGGGAGATCTTCCTGGAGTTCGTCAACATGCTGCCGGCGTTCCAGACCTACT	XP_004569020	ENSDART00000133676	si:dkey-91i10.2	dynamin-binding protein	0	NA	NA	M_beryllina_05_2013_comp101176_c0_seq1
M_beryllina_05_2013_comp101184_c0_seq1	CUST_16180_PI429335447	TTCTATAAGAAAAAACAGTGCCGTCCATCGAAAGGCAGAAAGCGAGGCTTCTGTTGGTGT	XP_003975353	ENSDART00000020400	igfbp3	insulin-like growth factor-binding protein 3-like	GO:0030514,GO:0060037,GO:0031994,GO:0001501,GO:0005576,GO:0030916,GO:0048009,GO:0005634,GO:0031995	NA	NA	M_beryllina_05_2013_comp101184_c0_seq1
M_beryllina_05_2013_comp101199_c0_seq1	CUST_41428_PI429335447	ATCAGTGCTAAAGTGAACAACAATAGCCTTGTTGGTGTGGGCTACACCCAAACACTTAGA	AEK25826	ENSDART00000126016	vdac2	voltage-dependent anion-selective channel protein 2	GO:0055085,GO:0044070,GO:0031101,GO:0005741,GO:0008308	NA	NA	M_beryllina_05_2013_comp101199_c0_seq1
M_beryllina_05_2013_comp101200_c1_seq1	CUST_11017_PI429335447	TACAAGAGCTTTGTCAAGGATTATCCTGTCGTTTCCATTGAGGACCCCTTTGACCAGGAT	CBN61534	ENSDART00000009337	eno1a	enolase 1 isoform partial	GO:0000015,GO:0004634,GO:0000287,GO:0006096,GO:0000162,GO:0006094,GO:0006571,GO:0009094	NA	NA	M_beryllina_05_2013_comp101200_c1_seq1
M_beryllina_05_2013_comp101200_c3_seq3	CUST_1846_PI429335447	GATGCTTGACATGGATGGCACAGAAAACAAATCTAAGTTTGGTGCTAATGCCATCCTGGG	AAG13313	ENSDART00000009337	eno1a	alpha-enolase-like isoform 1	GO:0000015,GO:0004634,GO:0000287,GO:0006096,GO:0000162,GO:0006094,GO:0006571,GO:0009094	NA	NA	M_beryllina_05_2013_comp101200_c3_seq3
M_beryllina_05_2013_comp101207_c0_seq1	CUST_42928_PI429335447	ATACAATTGCACCGGCTGAACGACCAGGACGACCCACAGTCGTTCCTGGGGATGTTTGAG	XP_003453461	NA	NA	zinc finger protein 85-like	GO:0003676,GO:0008168,GO:0032259	NA	NA	M_beryllina_05_2013_comp101207_c0_seq1
M_beryllina_05_2013_comp101212_c0_seq2	CUST_25852_PI429335447	TTTTTATGTTGGTGTTGCTACAGTTTAAAGAGCACTTCAAACCAGCCAGAGCTCTGACAC	XP_003438560	NA	NA	PREDICTED: hypothetical protein LOC100692312	0	NA	NA	M_beryllina_05_2013_comp101212_c0_seq2
M_beryllina_05_2013_comp101215_c1_seq1	CUST_38767_PI429335447	AACAGAGTGAGCACAGCAGCTAGAACAACGGCGGTTCTGTCCTGCCTGGTTCCAGTTCTG	XP_004571168	ENSDART00000112692	TMEM116	transmembrane protein 116-like	0	NA	NA	M_beryllina_05_2013_comp101215_c1_seq1
M_beryllina_05_2013_comp101221_c0_seq1	CUST_19000_PI429335447	GGCTGTATTCTTGGCTTCAAGGCGTATCTGATAGCATGTGTGTGGAACTGCTACAGATAT	XP_004560075	ENSDART00000052080	laptm4b	lysosomal-associated transmembrane protein 4b-like	GO:0016021	NA	NA	M_beryllina_05_2013_comp101221_c0_seq1
M_beryllina_05_2013_comp101225_c0_seq2	CUST_14080_PI429335447	ATTTTTGTGGATCTCTCCTACTGTTCGGTACAGTGTGATCCTTACATATCATCTGGTGTT	XP_004540316	ENSDART00000128410	CABZ01040021.1	granulocyte colony-stimulating factor receptor precursor	0	NA	NA	M_beryllina_05_2013_comp101225_c0_seq2
M_beryllina_05_2013_comp101228_c1_seq2	CUST_4741_PI429335447	GACAATGGAGATGGAACTGTAGACTTTGAAGAGTTTGTCAGAATGATGTCGGGTCAATGA	CBN81377	ENSDART00000043801	cabp5b	calcium-binding protein 5-like	GO:0005509	NA	NA	M_beryllina_05_2013_comp101228_c1_seq2
M_beryllina_05_2013_comp101229_c2_seq1	CUST_21298_PI429335447	AAAGTCCAGCGGACCAATCAGGTGTCAGAGCAGCTGGAGCTGCTGGAGCGCCGCTATTCG	XP_003446050	ENSDART00000152186	myh7ba	myosin-6- partial	0	NA	NA	M_beryllina_05_2013_comp101229_c2_seq1
M_beryllina_05_2013_comp101232_c1_seq2	CUST_24103_PI429335447	GAAATAAAAGGGGGTCATAACACAGAGCCAGACCTTCTCTTCTCTGCTAAGAAAAACTCC	BAC76420	ENSDART00000028529	PRF1 (4 of 8)	perforin-1-like	0	NA	NA	M_beryllina_05_2013_comp101232_c1_seq2
M_beryllina_05_2013_comp101242_c3_seq1	CUST_20725_PI429335447	AGATTTAAGGCCCGTATGTTACGAGGAGCCTGAGTACTGGTGTTCAGTAGCTTACTATGA	XP_003971365	ENSDART00000028618	smad9	mothers against decapentaplegic homolog 5	GO:0036342,GO:0009880,GO:0007179,GO:0048264,GO:0043049,GO:0001947,GO:0005667,GO:0060022,GO:0060030,GO:0003700,GO:0048514,GO:2000223,GO:0045449	NA	NA	M_beryllina_05_2013_comp101242_c3_seq1
M_beryllina_05_2013_comp101242_c3_seq2	CUST_19090_PI429335447	GTTGAATTTGAACGAGTCAACACACGTAAATGTAGATATGTAGAAATCACCTGCCTGTGA	XP_003971365	ENSDART00000028618	smad9	mad homolog 5	GO:0036342,GO:0009880,GO:0007179,GO:0048264,GO:0043049,GO:0001947,GO:0005667,GO:0060022,GO:0060030,GO:0003700,GO:0048514,GO:2000223,GO:0045449	NA	NA	M_beryllina_05_2013_comp101242_c3_seq2
M_beryllina_05_2013_comp101244_c0_seq1	CUST_36016_PI429335447	ATATAACAATCTACAGATGGTCCGTCCCCATGGTGATGTCCATCACATTCAGAGGAACTG	XP_004555215	ENSDART00000145728	sdhc	succinate dehydrogenase cytochrome b560 mitochondrial precursor	GO:0000104,GO:0009055,GO:0045281,GO:0006118,GO:0006119,GO:0018874,GO:0019643	NA	NA	M_beryllina_05_2013_comp101244_c0_seq1
M_beryllina_05_2013_comp101247_c0_seq2	CUST_14149_PI429335447	ATCAGAAGGAAGAAAAACCAGCCAAACAAAGAAGGTGCCTCCATGTCTCCGTTGTGGTTT	XP_004569549	ENSDART00000098303	oc90	group 10 secretory phospholipase a2-like	GO:0048840	NA	NA	M_beryllina_05_2013_comp101247_c0_seq2
M_beryllina_05_2013_comp101255_c0_seq1	CUST_178_PI429335447	TGCCCCGTCAAGCTGGAGCTGCAAACCCTGCAGTACAAAGCCGTCTACAAGTACCTCTGA	XP_003439531	ENSDART00000062348	mrps24	28s ribosomal protein s24- mitochondrial-like	GO:0005762,GO:0003735,GO:0016787,GO:0006412,GO:0042254	NA	NA	M_beryllina_05_2013_comp101255_c0_seq1
M_beryllina_05_2013_comp101257_c0_seq1	CUST_6244_PI429335447	ATGTTTACCTTTGTGGACCCAAATTCAATGGAACCTCTGAGGGAGCAGGTGTACATTCAC	BAJ07536	ENSDART00000099360	zp2.1	choriogenin h	GO:0005576	NA	NA	M_beryllina_05_2013_comp101257_c0_seq1
M_beryllina_05_2013_comp101260_c0_seq3	CUST_2854_PI429335447	TATGAAGGCTCACTCTAATGTGGTCAGCGTACAGAAACAGGCATGCATGCTGTTGAGAAA	XP_003438013	ENSDART00000085964	ARMC6	armadillo repeat-containing protein 6-like	0	NA	NA	M_beryllina_05_2013_comp101260_c0_seq3
M_beryllina_05_2013_comp101278_c0_seq2	CUST_26044_PI429335447	AGACAAGGTGAGCGCAGCCTACATTCTCTTTACGATTTGAAAATAATAAGGGAATATCTA	XP_003446942	NA	NA	PREDICTED: hypothetical protein LOC100701189	0	NA	NA	M_beryllina_05_2013_comp101278_c0_seq2
M_beryllina_05_2013_comp101278_c0_seq4	CUST_27610_PI429335447	TATGTCCATATATGGCAGCTCTTGTGGAGAGACAATTATCTTCATGGACAAAAAAGCACT	XP_004550101	NA	NA	PREDICTED: uncharacterized protein LOC101478582 isoform X1	0	NA	NA	M_beryllina_05_2013_comp101278_c0_seq4
M_beryllina_05_2013_comp101280_c0_seq1	CUST_4597_PI429335447	TTTGTGGACATGTTTTCGGTTCTCTGTGAAACTTCCCCCAGAGAACTGAAGACCATCTAC	XP_004086122	ENSDART00000130535	cib2	calcium and integrin-binding family member 2-like	GO:0007638,GO:0048884,GO:0007229,GO:0005509,GO:0043010	NA	NA	M_beryllina_05_2013_comp101280_c0_seq1
M_beryllina_05_2013_comp101284_c0_seq1	CUST_14398_PI429335447	AGAACTTGGCTGCAAAAAAGAAGTCTGTCGCCATGCACACCAATTACGTATCAGGATGCA	XP_004067462	ENSDART00000077724	gnb5b	guanine nucleotide-binding protein subunit beta-5-like	GO:0003674,GO:0008150,GO:0005575,GO:0004871,GO:0007165	NA	NA	M_beryllina_05_2013_comp101284_c0_seq1
M_beryllina_05_2013_comp101285_c2_seq4	CUST_36601_PI429335447	ATGAACACGACAGCACATTTTCAGAACTGCATCCAAATGTACACCATGAACAAACAGTAA	BAE78481	ENSDART00000104214	tas1r1	taste receptor type 1 member 1-like	GO:0016021,GO:0007186,GO:0005886,GO:0004930	NA	NA	M_beryllina_05_2013_comp101285_c2_seq4
M_beryllina_05_2013_comp101288_c0_seq1	CUST_27658_PI429335447	TGACGGAGGCAAAGGCTACAAAATTTGTTCACAGGGAAACATAAATATATTTCTGTCTGT	XP_004539324	NA	NA	PREDICTED: uncharacterized protein LOC101480425 isoform X1	0	NA	NA	M_beryllina_05_2013_comp101288_c0_seq1
M_beryllina_05_2013_comp101290_c1_seq1	CUST_21400_PI429335447	ACTCTTCCTCAGGCTGGGAATCATGCCCACCAGCAGCCACATCAGAGAGGTCTATGTGGA	XP_004539092	ENSDART00000080385	SLC9A3R2 (1 of 3)	na(+) h(+) exchange regulatory cofactor nhe-rf2-like	0	NA	NA	M_beryllina_05_2013_comp101290_c1_seq1
M_beryllina_05_2013_comp101302_c0_seq1	CUST_31807_PI429335447	ACGATAAACCCTATCGAAATCCAGGATGATGAAGATATGCCATTGGAAGTGACTGAGTGT	XP_003440543	ENSDART00000073913	rag1	recombination-activating protein partial	GO:0033151,GO:0043565,GO:0008270	NA	NA	M_beryllina_05_2013_comp101302_c0_seq1
M_beryllina_05_2013_comp101312_c0_seq1	CUST_14572_PI429335447	AACCACTTCATCTCTGAGTTCAAGCGCAAGTACAAGAAAGACATCAGCGACAACAAGAGG	ABC66268	ENSDART00000043743	HSPA8 (1 of 2)	heat shock cognate 70 kda protein	GO:0005524,GO:0006950	NA	NA	M_beryllina_05_2013_comp101312_c0_seq1
M_beryllina_05_2013_comp101314_c0_seq1	CUST_25411_PI429335447	GAACTTTCTCTAAACAAAACCAACGGCACCTGGCAAAATGAGAAAAACGGCATGCATTGA	XP_003453701	ENSDART00000113059	KCNA10 (2 of 2)	potassium voltage-gated channel subfamily a member 10-like	GO:0005249,GO:0034765,GO:0051260,GO:0008076,GO:0071805	NA	NA	M_beryllina_05_2013_comp101314_c0_seq1
M_beryllina_05_2013_comp101322_c1_seq1	CUST_10369_PI429335447	TGGGCGGAGATCCCCCTGCCGCACGGGACCCACGCTTTCCACGCCGCCTGCCCCTTCTGC	XP_004082355	ENSDART00000049503	peli2	e3 ubiquitin-protein ligase pellino homolog 2-like	GO:0008063	NA	NA	M_beryllina_05_2013_comp101322_c1_seq1
M_beryllina_05_2013_comp101326_c0_seq4	CUST_19603_PI429335447	AGATGTCAGTTATCAGAAAGAAAAAGAGGCGGCCACTGAAGACCAACCTGATGACAGCAT	XP_004559402	NA	NA	melanoma inhibitory activity protein 3-like	0	NA	NA	M_beryllina_05_2013_comp101326_c0_seq4
M_beryllina_05_2013_comp101338_c0_seq9	CUST_14752_PI429335447	GGAACTTTATGTTCTTTCTCAGAACTTCTTCTATGAAAAGATCTACCCTAAGGTAAACTG	XP_003444313	ENSDART00000089327	hs2st1a	heparan sulfate 2-o-sulfotransferase 1-like	GO:0016021,GO:0008146	NA	NA	M_beryllina_05_2013_comp101338_c0_seq9
M_beryllina_05_2013_comp101341_c0_seq2	CUST_32905_PI429335447	ATATTCCCATCATAGAAAGAGAGGTTTCAGGACCTCAGCCACACTTCAAGATGGCTCTGA	XP_003441465	ENSDART00000020283	rpusd4	rna pseudouridylate synthase domain-containing protein 4	GO:0003723,GO:0001522,GO:0009982	NA	NA	M_beryllina_05_2013_comp101341_c0_seq2
M_beryllina_05_2013_comp101343_c0_seq1	CUST_382_PI429335447	AGAAAGAGTGACGGTATTTATATCATCAACCTGAAGAAGACCTGGGAGAAGCTGCTGCTG	CCK73157	ENSDART00000135945	rpsa	40s ribosomal protein sa	GO:0006412,GO:0000461,GO:0006407,GO:0003735,GO:0005055,GO:0022627,GO:0030686,GO:0007155,GO:0043236,GO:0000028,GO:0000447,GO:0005634,GO:0005886,GO:0007165	NA	NA	M_beryllina_05_2013_comp101343_c0_seq1
M_beryllina_05_2013_comp101344_c0_seq1	CUST_2623_PI429335447	AAATGAGCGTCATGCGCACCTCTGTGGACGAGGAGCTGGAGAGGTTAACAGATCTGCTGG	ACF21982	ENSDART00000058965	apoeb	apolipoprotein e	GO:0006810	NA	NA	M_beryllina_05_2013_comp101344_c0_seq1
M_beryllina_05_2013_comp101345_c0_seq1	CUST_16426_PI429335447	GAGGTGGACATCCTCTTCACATACCTGCATGAATACTGCGTGAAGCCCGACCCCCAGTGA	AFV61510	NA	NA	interleukin 22	GO:0050829,GO:0006955	NA	NA	M_beryllina_05_2013_comp101345_c0_seq1
M_beryllina_05_2013_comp101346_c0_seq1	CUST_29287_PI429335447	AGGAGAGGAGGAGGATGCAGCTGGTGGAGCGTTTCCAGACGGCGCCCTTTGAGGAGATAG	XP_004565672	ENSDART00000135118	efr3ba	protein efr3 homolog b-like	0	NA	NA	M_beryllina_05_2013_comp101346_c0_seq1
M_beryllina_05_2013_comp101348_c0_seq1	CUST_8197_PI429335447	AACTTGCCACAGTTAGATCTGCCGCAAAAGTGTGTAGTCTCGGTGTGTCCAGAAATAGAA	XP_003451775	NA	NA	tpa: transposase domain-containing protein	0	NA	NA	M_beryllina_05_2013_comp101348_c0_seq1
M_beryllina_05_2013_comp101349_c0_seq1	CUST_38155_PI429335447	TCATGGAGATTTCCAAACCCGAGCCTATTAGTGTTTCAACAGGATTATGGTCCTCTCCTG	XP_004564340	ENSDART00000132602	pax5	transcription factor pax5	GO:0009880,GO:0030917,GO:0030901,GO:0048596,GO:0035775,GO:0060113,GO:0030878,GO:0006355,GO:0043049,GO:0021588,GO:0001708,GO:0007422,GO:0003677,GO:0005634,GO:0072114	NA	NA	M_beryllina_05_2013_comp101349_c0_seq1
M_beryllina_05_2013_comp101350_c0_seq1	CUST_12124_PI429335447	ACAATGACCCACATTTGTGTGACTTCATTGAGACCCACTACCTTGATGAGCAGGTGAAGT	ADU87113	ENSDART00000027329	fth1a	ferritin high chain	GO:0006879,GO:0016491,GO:0008199,GO:0006826,GO:0055114	NA	NA	M_beryllina_05_2013_comp101350_c0_seq1
M_beryllina_05_2013_comp101367_c0_seq2	CUST_38521_PI429335447	GCACCATCGTATATTTATCGACTTATGAGTGAGCTTTACCACCCAGAGGACCATGAGCTT	XP_004541906	ENSDART00000060689	eif2b2	translation initiation factor eif-2b subunit beta	GO:0046523,GO:0019509,GO:0051716,GO:0014003,GO:0005525,GO:0003743,GO:0006446,GO:0042552,GO:0005524,GO:0005851,GO:0005085,GO:0005840,GO:0043087	NA	NA	M_beryllina_05_2013_comp101367_c0_seq2
M_beryllina_05_2013_comp101382_c1_seq1	CUST_38281_PI429335447	ACGAAAACGACCGAAACAACCAGATAGTTATGGAGTATCAGGTGCAGATCAACAGCGTCA	XP_004545770	ENSDART00000128588	taf7	transcription initiation factor tfiid subunit 7	GO:0003743,GO:0006367,GO:0005669,GO:0005840,GO:0006446	NA	NA	M_beryllina_05_2013_comp101382_c1_seq1
M_beryllina_05_2013_comp101385_c0_seq3	CUST_34177_PI429335447	ATTCAGCCCAGCACAGAAAATATTATTTTTATGGGCCGGATTGTGAACCCAAACATCTAA	AFO64912	ENSDART00000149850	si:ch211-186e20.2	serpin peptidase clade a (alpha-1 antitrypsin) member 7	GO:0019222,GO:0004867	NA	NA	M_beryllina_05_2013_comp101385_c0_seq3
M_beryllina_05_2013_comp101392_c0_seq1	CUST_28084_PI429335447	TTAAGCAGGGCTTTAAGGATAACCTTCATGCAGTGTTTTGCCTCGCTGAGAACTCAGTTG	XP_004069157	ENSDART00000024578	npepl1	probable aminopeptidase npepl1	GO:0005737,GO:0006508,GO:0030145,GO:0008235,GO:0004177	NA	NA	M_beryllina_05_2013_comp101392_c0_seq1
M_beryllina_05_2013_comp101395_c0_seq1	CUST_13960_PI429335447	GACTTCCAGTTCAGCTCTACTCTTGGGGTGGAAGAAAGATATGTCGAAACCAGTGGAAAA	XP_004560009	ENSDART00000124404	gpn2	gpn-loop gtpase 2-like	GO:0005525	NA	NA	M_beryllina_05_2013_comp101395_c0_seq1
M_beryllina_05_2013_comp101398_c2_seq6	CUST_28900_PI429335447	TCAATATGTAACGTTACACGACATGATCCTGAAGAACATCGAGAAGATAAAGAGGCCCCG	AFO64919	ENSDART00000002835	psme3	proteasome activator complex subunit 3	GO:0008537	NA	NA	M_beryllina_05_2013_comp101398_c2_seq6
M_beryllina_05_2013_comp101401_c0_seq3	CUST_5122_PI429335447	CACTTTTGAGTTTGTTACGGATGTGGAGATTGTTGGAGAACACCTGGATGAGGTGTTCTA	XP_003451808	ENSDART00000087467	cmya5	cardiomyopathy-associated protein 5-like	0	NA	NA	M_beryllina_05_2013_comp101401_c0_seq3
M_beryllina_05_2013_comp101402_c3_seq6	CUST_29065_PI429335447	AAATTCGGCATCACTGAGTCCGACTGGTACCGGATCAAACAAAGCATCGATTCAAAGTGT	XP_003440570	ENSDART00000016310	banp	protein banp-like	GO:0016568,GO:0007049,GO:0006355,GO:0003677,GO:0005634	NA	NA	M_beryllina_05_2013_comp101402_c3_seq6
M_beryllina_05_2013_comp101405_c0_seq1	CUST_33058_PI429335447	TACGAAGAACTCCTTAATCAGGCAGAAAGTCTGACCAGCAGAGACCGGGAACCTCCATGA	XP_004571183	NA	NA	rootletin-like isoform x3	0	NA	NA	M_beryllina_05_2013_comp101405_c0_seq1
M_beryllina_05_2013_comp101412_c0_seq1	CUST_5575_PI429335447	ATATTGGGCCTTTGCCTGTGTCTGGACATAAAACGAAAGAATTATGAGGACATCAGCTGA	XP_004561400	ENSDART00000031047	cd63	cd63 antigen	GO:0016021,GO:0016020,GO:0035188	NA	NA	M_beryllina_05_2013_comp101412_c0_seq1
M_beryllina_05_2013_comp101413_c1_seq1	CUST_32719_PI429335447	AGTGAAAGAATGTGTGATCTGCATGATGGATTTCGAGTATGGCGATCCCATCCGGTTCTT	AAH53118	ENSDART00000018817	rnf11a	ring finger protein 11-like	GO:0008270	NA	NA	M_beryllina_05_2013_comp101413_c1_seq1
M_beryllina_05_2013_comp101415_c2_seq1	CUST_20230_PI429335447	ACCAAAAGAACTTCAGGAGGTTGCAGACAAAGAGATTGCAACACTACCCAGAGACAGTTG	ACQ58636	ENSDART00000098736	mrps14	mitochondrial 28s ribosomal protein s14	GO:0005840,GO:0003735,GO:0016787,GO:0006412,GO:0042254	NA	NA	M_beryllina_05_2013_comp101415_c2_seq1
M_beryllina_05_2013_comp101417_c0_seq1	CUST_28057_PI429335447	GCCCTCAAATGTGGAACTGTTTTCTACTGTCAGAAATTTGCCTGGACTTCTCTGAACTAA	XP_004538237	ENSDART00000097254	sftpbb	proactivator polypeptide-like	GO:0006629	NA	NA	M_beryllina_05_2013_comp101417_c0_seq1
M_beryllina_05_2013_comp101419_c0_seq1	CUST_10126_PI429335447	AAGAATGAGAAAAGTCTACTGGCTGCTATGTTCGAGCGAGAGACAAAACGGGAGAAGATC	XP_004564470	ENSDART00000003339	DNAI2	dynein axonemal intermediate 2a	GO:0003674,GO:0008150,GO:0005575,GO:0005868,GO:0007018	NA	NA	M_beryllina_05_2013_comp101419_c0_seq1
M_beryllina_05_2013_comp101422_c0_seq1	CUST_17200_PI429335447	GCTGCAGCTGCTGCTGACCCACACGCACCTGGTCCTGCTGCAGGAGGACGCCGTCCTCCA	XP_004538698	ENSDART00000113661	kif16bb	kinesin-like protein kif16b-like isoform x4	0	NA	NA	M_beryllina_05_2013_comp101422_c0_seq1
M_beryllina_05_2013_comp101425_c0_seq4	CUST_38992_PI429335447	GCCAGAATAACTCAAATGAAGGGACGTTACGACTCCGGTGTAGCTATCGCCATGTTATAA	XP_004559490	ENSDART00000129501	TMEM235 (1 of 2)	transmembrane protein 235-like	0	NA	NA	M_beryllina_05_2013_comp101425_c0_seq4
M_beryllina_05_2013_comp101431_c0_seq4	CUST_39799_PI429335447	TGTTATGTAAACCCCACACGGGAGATGATGATCGTCAGAGGGAAGTACATATCAAGCAAC	XP_003440538	ENSDART00000150631	TSG101 (5 of 5)	tumor susceptibility gene 101	GO:0005575,GO:0015031,GO:0006464	NA	NA	M_beryllina_05_2013_comp101431_c0_seq4
M_beryllina_05_2013_comp101433_c0_seq2	CUST_40273_PI429335447	TACCAGCAGTTAATACCACTGGTGGAGAAGGCAAAAGAGAAACAAAGCGCCAAAAAAGCC	XP_003453569	ENSDART00000105644	uchl5	ubiquitin carboxyl-terminal hydrolase isozyme l5	GO:0006511,GO:0004221,GO:0008242,GO:0007219,GO:0016579,GO:0016043,GO:0044424	NA	NA	M_beryllina_05_2013_comp101433_c0_seq2
M_beryllina_05_2013_comp101435_c1_seq1	CUST_16174_PI429335447	AAGGAAGCAGCATATGACCGTGAAGTATTCCAAATACGATGTGTGGAATAGGAAGGCAGC	AAB64195	ENSDART00000047569	igf2b	insulin-like growth factor ii	GO:0031101,GO:0005615,GO:0008083,GO:0030900,GO:0005159,GO:0030903,GO:0048793,GO:0001756,GO:0005179,GO:0007165,GO:0008283	NA	NA	M_beryllina_05_2013_comp101435_c1_seq1
M_beryllina_05_2013_comp101438_c0_seq1	CUST_27910_PI429335447	TCATTTATATGTGTCTTTGAGAAGGTGGAGGAGAACACCAGGAAGAGCCTGTTCAAGCTG	XP_004556949	ENSDART00000065562	pcf11	pre-mrna cleavage complex 2 protein pcf11	GO:0006886	NA	NA	M_beryllina_05_2013_comp101438_c0_seq1
M_beryllina_05_2013_comp101438_c0_seq4	CUST_27913_PI429335447	AAACCTAATCACTTCATTTATATGTGTCTTTGAGAAGGTACGCTTCCGTTCGGGGCTCCG	CAF91778	ENSDART00000065562	pcf11	pre-mrna cleavage complex 2 protein pcf11-like	GO:0003674,GO:0006886	NA	NA	M_beryllina_05_2013_comp101438_c0_seq4
M_beryllina_05_2013_comp101441_c1_seq1	CUST_4273_PI429335447	AACAGAAGCGCTATACACGGATTGCTGACAAGAAAGCTGTCCAAGAGGCAGCTTATAAAT	XP_004076427	ENSDART00000065544	BUD13	bud13 homolog isoform 1	0	NA	NA	M_beryllina_05_2013_comp101441_c1_seq1
M_beryllina_05_2013_comp101442_c0_seq1	CUST_12805_PI429335447	AGATCAAAGACACGGCCCGCCGAGTCACAAAGCTGTCCCAGAAAAACCCCCAAAACCAGA	XP_004572114	ENSDART00000112258	GPRIN3	g protein-regulated inducer of neurite outgrowth 2- partial	0	NA	NA	M_beryllina_05_2013_comp101442_c0_seq1
M_beryllina_05_2013_comp101446_c0_seq1	CUST_21484_PI429335447	AAACAAAAAAGAATTACTACAAGAGGATAGAGCCTGCAGATGCCCACGTGTTGCAGAAAA	XP_003443555	ENSDART00000122762	naa50	n-acetyltransferase nat13	GO:0001756,GO:0005737,GO:0008080,GO:0042967	NA	NA	M_beryllina_05_2013_comp101446_c0_seq1
M_beryllina_05_2013_comp101447_c0_seq1	CUST_18883_PI429335447	AAGATGCTGCTGAAGGAGAGCAGCAAGTTCCCGTCCTACAACTACAGGACCTACGCGGTG	XP_004080862	ENSDART00000113384	lyrm4	lyr motif-containing protein 4	GO:0005634,GO:0005739	NA	NA	M_beryllina_05_2013_comp101447_c0_seq1
M_beryllina_05_2013_comp101451_c0_seq3	CUST_12589_PI429335447	AAGACCAACCCCAACAGCCTGAAAGAACGATTACGTCAAAAAGAAGCCAGCTTTTCGTGA	XP_003446376	ENSDART00000136804	fmn1	formin-1-like isoform x2	0	NA	NA	M_beryllina_05_2013_comp101451_c0_seq3
M_beryllina_05_2013_comp101454_c0_seq2	CUST_5965_PI429335447	TCTTCGCCGACCCGGTGGAGAACAGGAACCTGTCCGATCTGGTCCTGCTGGACAAGCGTT	CAG06646	ENSDART00000115344	cep70	centrosomal protein of 70 kda-like	GO:0060287,GO:0060271	NA	NA	M_beryllina_05_2013_comp101454_c0_seq2
M_beryllina_05_2013_comp101471_c0_seq1	CUST_18178_PI429335447	ATATGGTAACGATTCTGCATTCCATGACATAGACAGCGACACGTCTTTAACCAGCCTCAG	XP_003445591	ENSDART00000127460	lmx1bb	lim homeodomain protein	GO:0021592,GO:0008270,GO:0032474,GO:0006355,GO:0048752,GO:0043565,GO:0003700,GO:0060041,GO:0061386,GO:0030917,GO:0060117,GO:0005667,GO:0045449	NA	NA	M_beryllina_05_2013_comp101471_c0_seq1
M_beryllina_05_2013_comp101480_c0_seq1	CUST_26917_PI429335447	TCGGAAAACCCTGCTGAGATGATTTATCAAGTCACCTCATCTGTCCCCATAAAGACTTGA	XP_004086714	NA	NA	PREDICTED: uncharacterized protein LOC101161715	0	NA	NA	M_beryllina_05_2013_comp101480_c0_seq1
M_beryllina_05_2013_comp101483_c0_seq1	CUST_9580_PI429335447	AAAGTCAGTAAAGTGGAGATCCTTCAGCATGTCATAGACTACATCCTGGACTTGCAGCTG	XP_003452141	ENSDART00000066372	id4	dna-binding protein inhibitor id-2	GO:0045664,GO:0033261,GO:0046983,GO:0045892,GO:0005737,GO:0005634	NA	NA	M_beryllina_05_2013_comp101483_c0_seq1
M_beryllina_05_2013_comp101492_c1_seq1	CUST_18415_PI429335447	TCAAATACGATATTTGAACGAAGAATTGGAGAGGTTTCAGCTCCGATGCGACGACCTGGA	XP_004555846	ENSDART00000130638	C5H9orf117	loc794225 protein	0	NA	NA	M_beryllina_05_2013_comp101492_c1_seq1
M_beryllina_05_2013_comp101504_c0_seq1	CUST_5470_PI429335447	AACTTGGAGACGCAACACAAAGTGCTGGAGCTGGCCGCGGAGAACGACCGTTTACAGAAG	XP_004546487	ENSDART00000062702	cebpb	ccaat enhancer-binding protein beta	GO:0006355,GO:0044030,GO:0009617,GO:0043565,GO:0003700,GO:0005667,GO:0045449	NA	NA	M_beryllina_05_2013_comp101504_c0_seq1
M_beryllina_05_2013_comp101507_c2_seq1	CUST_32002_PI429335447	AACAGAGACAAAGATGCCATCATTGATGTGATTGGAGTGTGCAAAAGTGCAGAGGATGTG	XP_003457593	ENSDART00000032880	rpa1	replication protein a 70 kda dna-binding subunit-like	GO:0005488,GO:0007507	NA	NA	M_beryllina_05_2013_comp101507_c2_seq1
M_beryllina_05_2013_comp101511_c0_seq1	CUST_34153_PI429335447	CGGCGCCCGCCCAGCCGTCCCCACCGCCCGCCAGGACAAGCCCCGCCCCCAGGGGGAGCC	XP_004565343	NA	NA	serine-rich coiled-coil domain-containing protein 2-like	0	NA	NA	M_beryllina_05_2013_comp101511_c0_seq1
M_beryllina_05_2013_comp101513_c0_seq1	CUST_9577_PI429335447	TCAACGCAGAGCTCGCCAGCATCTCAGTGGAGAACGGCTGCTCAGACGACAGGATTATGT	CBN81030	ENSDART00000059732	id1	dna-binding protein inhibitor id-1	GO:0046983,GO:0045892,GO:0005737,GO:0005634	NA	NA	M_beryllina_05_2013_comp101513_c0_seq1
M_beryllina_05_2013_comp101514_c0_seq1	CUST_36247_PI429335447	GATGATGAATCATCTGCAAGTCAATCATCCACTGAAGTCTCAAAAGTTGAACCATCTTAG	AAP57196	ENSDART00000011178	opn1sw2	sws2b opsin	GO:0004930,GO:0007602,GO:0018298,GO:0007186,GO:0009881,GO:0007601,GO:0016021	NA	NA	M_beryllina_05_2013_comp101514_c0_seq1
M_beryllina_05_2013_comp101514_c0_seq2	CUST_3943_PI429335447	AAGGTGGCTGGTTATCTGCAAGCCACTTGGGAATTTTGCCTTCAAATCTGAGCATGCTTT	AAP57196	ENSDART00000011178	opn1sw2	blue-green sensitive visual pigment	GO:0004930,GO:0007602,GO:0018298,GO:0007186,GO:0009881,GO:0007601,GO:0016021	NA	NA	M_beryllina_05_2013_comp101514_c0_seq2
M_beryllina_05_2013_comp101517_c0_seq2	CUST_8989_PI429335447	ATCAAAGAATTAAAGTATGCACTCGTGTGGGGCGCATCTGTGAAACACAACCCTCAAAAG	XP_004074863	ENSDART00000057500	drg1	developmentally-regulated gtp-binding protein 1	GO:0005525	NA	NA	M_beryllina_05_2013_comp101517_c0_seq2
M_beryllina_05_2013_comp101526_c1_seq1	CUST_16798_PI429335447	AGAAAAAGTCTGTATTGAAACGGTGGAAAACGGCGTGATGACCAAAGACCTAGCAGTCTG	CBN63693	ENSDART00000004692	IDH2	isocitrate dehydrogenase	GO:0051287,GO:0004450,GO:0000287,GO:0006102,GO:0006749,GO:0019643	NA	NA	M_beryllina_05_2013_comp101526_c1_seq1
M_beryllina_05_2013_comp101528_c0_seq1	CUST_26482_PI429335447	ATATCTGACACGGACTTCTGTTCGCCCAGCAAGCAGTTTTCCCCAGATGTTTATTCTTCT	XP_004537996	ENSDART00000081105	C15H11orf53 (2 of 2)	PREDICTED: uncharacterized protein C11orf53 homolog	GO:0003674,GO:0008150,GO:0005575	NA	NA	M_beryllina_05_2013_comp101528_c0_seq1
M_beryllina_05_2013_comp101531_c0_seq1	CUST_38548_PI429335447	TACGACGGCCTCAAGTACGACGTCAAGAAGATCGAGGAGGTGGTCTACGACCTGTCCATC	XP_003454951	ENSDART00000061299	tsn	translin associated factor x	GO:0043565	NA	NA	M_beryllina_05_2013_comp101531_c0_seq1
M_beryllina_05_2013_comp101534_c0_seq2	CUST_42439_PI429335447	ATCTTAAAGTCCGAAGGAAGTCTAGGGCTAATCACAGTGGGAAGAAGTTGGCTGCTCATA	XP_004575057	ENSDART00000018832	ZCCHC4	zinc finger cchc domain-containing protein 4-like	GO:0003676,GO:0008270	NA	NA	M_beryllina_05_2013_comp101534_c0_seq2
M_beryllina_05_2013_comp101535_c0_seq2	CUST_17452_PI429335447	AAGTTCTCCCCAAAGTTTGTGCTGAAGGCGGGACAGTCGGTCACGGTGTGGTCTGCTGAT	XP_004569379	ENSDART00000009438	lmnb2	lamin b2	GO:0005882,GO:0005635,GO:0005198	NA	NA	M_beryllina_05_2013_comp101535_c0_seq2
M_beryllina_05_2013_comp101536_c1_seq2	CUST_7468_PI429335447	TCATTCAGACTGGAGGACAGCCAGATAAAGGTGTGGGAGGTGATTGGGCGGTCTCTGGTG	XP_004570729	ENSDART00000138948	ccs	copper chaperone for superoxide dismutase-like	GO:0005829,GO:0015680,GO:0055114,GO:0010038,GO:0008270,GO:0005743,GO:0004784,GO:0009410,GO:0070050,GO:0016532,GO:0019430,GO:0051597,GO:0005634	NA	NA	M_beryllina_05_2013_comp101536_c1_seq2
M_beryllina_05_2013_comp101545_c0_seq1	CUST_28861_PI429335447	GGTGCAGATGAAGAGCATGATTCTGCAGACAGCGATGATGAAAAAATACCAGACCTTGAG	XP_003448201	ENSDART00000054237	ptges3a	prostaglandin e synthase 3	0	NA	NA	M_beryllina_05_2013_comp101545_c0_seq1
M_beryllina_05_2013_comp101550_c0_seq1	CUST_12253_PI429335447	ACATGCTGGAGCACTCGCACAACTACGTGAACACTGAGAACGTGACGGCGCCGCTCAGCG	XP_004571602	ENSDART00000067423	frs2a	fibroblast growth factor receptor substrate 2-like	GO:0005158,GO:0008150,GO:0005575	NA	NA	M_beryllina_05_2013_comp101550_c0_seq1
M_beryllina_05_2013_comp101552_c0_seq1	CUST_15700_PI429335447	ATTGAAACCATGAGAAGCCTCCGGAAAGAAAAAGATGGTTTCCGAGTCCCTAAGGAGTAA	XP_004558407	ENSDART00000134208	hagh	hydroxyacylglutathione hydrolase	GO:0005759,GO:0004416,GO:0008270,GO:0006750,GO:0006090	NA	NA	M_beryllina_05_2013_comp101552_c0_seq1
M_beryllina_05_2013_comp101554_c1_seq1	CUST_24208_PI429335447	TCATCAGCTGTACAAGAAATACATCCTTCCCCTCATTATTGGGAGCCGAGAGGACAAGAA	XP_004070708	ENSDART00000078171	pex14	peroxisomal membrane protein pex14-like	GO:0016558,GO:0005778,GO:0003714,GO:0045892,GO:0005667,GO:0016481	NA	NA	M_beryllina_05_2013_comp101554_c1_seq1
M_beryllina_05_2013_comp101561_c1_seq2	CUST_24073_PI429335447	GACCCTCCTGTCAAGACAAAGTTTGGCTATCACATCATTATGGTTGAGGGAAAAAAGTGA	XP_004073449	ENSDART00000026846	pin4	peptidyl-prolyl cis-trans isomerase nima-interacting 4-like	GO:0005737,GO:0005730,GO:0006457,GO:0003677,GO:0005819,GO:0003755	NA	NA	M_beryllina_05_2013_comp101561_c1_seq2
M_beryllina_05_2013_comp101563_c0_seq1	CUST_4501_PI429335447	ATATTTGATGAGAAATCAGAAACTCATTCAGACTCGACCGCCACAGAGAACACACATTGA	XP_004551866	ENSDART00000087449	CDH12 (1 of 2)	cadherin-12 precursor	GO:0007156,GO:0005886,GO:0005509,GO:0016021,GO:0060034	NA	NA	M_beryllina_05_2013_comp101563_c0_seq1
M_beryllina_05_2013_comp101565_c0_seq9	CUST_39589_PI429335447	AATTTGGCATCTCAGAAGAGGACTTTTTGGACAGCTTCACACATCTGGAGCAGGTTGTCT	XP_003441754	ENSDART00000146735	tubd1	tubulin delta chain-like	GO:0005874,GO:0051258,GO:0006184,GO:0007017,GO:0003924,GO:0005200,GO:0005525	NA	NA	M_beryllina_05_2013_comp101565_c0_seq9
M_beryllina_05_2013_comp101568_c0_seq3	CUST_21619_PI429335447	GGGAAACCCAGAGAAAAACTACTCACAGTAGAGGAAATGCTGAAAGTGGCTCGAACATGA	XP_004557552	ENSDART00000126405	FDXR	nadph:adrenodoxin mitochondrial-like	GO:0016491,GO:0005759,GO:0008203,GO:0022900	NA	NA	M_beryllina_05_2013_comp101568_c0_seq3
M_beryllina_05_2013_comp101569_c0_seq1	CUST_37321_PI429335447	AAGACACTGAAATTGACTGGAGTTCCTACTCTGCTGCGATATGGCACTCCTCAAAAACTG	ACQ58847	ENSDART00000080892	txndc17	thioredoxin domain-containing protein 17	GO:0005737	NA	NA	M_beryllina_05_2013_comp101569_c0_seq1
M_beryllina_05_2013_comp101575_c0_seq2	CUST_24724_PI429335447	AAGGCTCAGATCAGGCAGATATTCTTTGAGGAGCAACAGCGAGATTACAAGAGCAAGAAG	XP_004576240	ENSDART00000065036	phax	phosphorylated adapter rna export	GO:0003674,GO:0008150,GO:0005575	NA	NA	M_beryllina_05_2013_comp101575_c0_seq2
M_beryllina_05_2013_comp101577_c0_seq1	CUST_30403_PI429335447	TTCAGACGGAATCCGTATTTCCAGAACAACATCATCATGAAGGAGCTGCATCTTGGGATG	XP_003439177	ENSDART00000007482	TSPY2	protein set	GO:0006334,GO:0005634	NA	NA	M_beryllina_05_2013_comp101577_c0_seq1
M_beryllina_05_2013_comp101583_c0_seq1	CUST_3592_PI429335447	TCAAGTCGGTGGTGGCCAAGTTCAAAAGTGAGAACAACGGCCTGCCCGAAAACGGAGAGG	XP_004538998	ENSDART00000140827	bcl11ab	b-cell lymphoma leukemia 11a-like	GO:0008270,GO:0003676,GO:0005622	NA	NA	M_beryllina_05_2013_comp101583_c0_seq1
M_beryllina_05_2013_comp101588_c0_seq2	CUST_27400_PI429335447	CCGTTCAGCACATGGACTCACGAAAACATCTCATAAACACTCTGATGTACCAGAATCCGT	XP_004548107	NA	NA	PREDICTED: uncharacterized protein LOC101470493	0	NA	NA	M_beryllina_05_2013_comp101588_c0_seq2
M_beryllina_05_2013_comp101588_c0_seq3	CUST_26002_PI429335447	ACCTACTCAGAAGTGATGTTCACTCTGTGTGAGAACGAGAACCTCCTCAAGCTGTTTGAA	XP_003444185	NA	NA	PREDICTED: hypothetical protein LOC100699558	0	NA	NA	M_beryllina_05_2013_comp101588_c0_seq3
M_beryllina_05_2013_comp101597_c1_seq2	CUST_10291_PI429335447	AGTCCCTTTTCTCGAACTACACCTCCCAGGCTCCCTTGCGGCGTAAAAACCGTCCCTGCT	XP_004573724	ENSDART00000093371	CR376794.1	e3 ubiquitin-protein ligase hecw1-like	GO:0005622,GO:0016567,GO:0004842	NA	NA	M_beryllina_05_2013_comp101597_c1_seq2
M_beryllina_05_2013_comp101602_c0_seq1	CUST_33262_PI429335447	ACAATCGCTCATATCCCAGTGGATCTCTGACTGCAGGTCGGTCTGGAGAGTGGCACGTGT	XP_004571761	ENSDART00000114359	si:dkeyp-72g9.4	sb:cb1022 protein	0	NA	NA	M_beryllina_05_2013_comp101602_c0_seq1
M_beryllina_05_2013_comp101603_c0_seq1	CUST_40414_PI429335447	TGTTTTGGCAGTGATGGGAAGCTGGTCCTACATTATTGTAAATCTCAAGCCTGGGGTTAA	XP_003450726	ENSDART00000101304	atg12	ubiquitin-like protein atg12-like	GO:0005737,GO:0000045	NA	NA	M_beryllina_05_2013_comp101603_c0_seq1
M_beryllina_05_2013_comp101610_c0_seq2	CUST_12364_PI429335447	TATGAGGAGACTTCAATGATTGTGGAAACCATGATTGAAAAGTCCAGCAAGAAGAAACAC	CAF98619	ENSDART00000114655	CU929052.1	filensin-like isoform x2	GO:0005882,GO:0005198,GO:0008150,GO:0007601,GO:0050896,GO:0045095	NA	NA	M_beryllina_05_2013_comp101610_c0_seq2
M_beryllina_05_2013_comp101612_c0_seq2	CUST_13105_PI429335447	GAGATGATGACCAAACAGATCGTGCAGGCCATCTCAGGGATGGTTTGTTCGCAGAGGTGA	XP_003453823	NA	NA	gastrin cholecystokinin-like peptide-like	0	NA	NA	M_beryllina_05_2013_comp101612_c0_seq2
M_beryllina_05_2013_comp101615_c4_seq1	CUST_32818_PI429335447	ACAAACAGAGCATACAGTCCGGGAAATCGGCAACCAAGACCAACAAGAACTCTCACATTT	XP_003442827	ENSDART00000075497	rybpb	ring1 and yy1-binding protein b-like	GO:0008270,GO:0006915,GO:0006355,GO:0003677,GO:0005737,GO:0005634	NA	NA	M_beryllina_05_2013_comp101615_c4_seq1
M_beryllina_05_2013_comp101617_c0_seq1	CUST_3736_PI429335447	ATCTCTTTCTACATTCCTCTCCTGGTCATGATATTCGTTTACGCGCGCGTTTACAGAGAG	CBN81445	ENSDART00000130938	adrb1	beta-1 adrenergic receptor-like	GO:0004940,GO:0002027,GO:0005886,GO:0071875,GO:0043473,GO:0016021,GO:0007187	NA	NA	M_beryllina_05_2013_comp101617_c0_seq1
M_beryllina_05_2013_comp101619_c0_seq1	CUST_9817_PI429335447	AGTGTTTTAAAATCCCCATAGCTGAGGTTGCGGTCAACTGGACTGAAATAGAAGGGTCCA	XP_003458314	ENSDART00000087114	alg5	dolichyl-phosphate beta-glucosyltransferase-like	GO:0016757	NA	NA	M_beryllina_05_2013_comp101619_c0_seq1
M_beryllina_05_2013_comp101622_c0_seq2	CUST_11794_PI429335447	TCCATGGACGTTTGGTGCAACGGGCAGAAAATGGAAACCACGGGGGAGTTTGTGGACGAG	XP_003454726	ENSDART00000019053	faima	fas apoptotic inhibitory molecule 1-like	GO:0043066	NA	NA	M_beryllina_05_2013_comp101622_c0_seq2
M_beryllina_05_2013_comp101623_c1_seq2	CUST_30871_PI429335447	ACAAAAAAGCAAAAGAAGGAGGAAAATGGAGACTCAAAAGAAGCTGAAGTGAAGGCCTAG	XP_003459621	NA	NA	prothymosin alpha-like	0	NA	NA	M_beryllina_05_2013_comp101623_c1_seq2
M_beryllina_05_2013_comp101628_c0_seq2	CUST_5362_PI429335447	GTCTACGCCCGCGTGTGCCGCTACACCAGCTGGATCAGCTCCATCATGAGCAACAATTAA	XP_003969348	ENSDART00000048599	rps19	40s ribosomal protein s19	GO:0006412,GO:0005840,GO:0003735,GO:0072332,GO:0045646,GO:0035284,GO:0009790,GO:0042254	NA	NA	M_beryllina_05_2013_comp101628_c0_seq2
M_beryllina_05_2013_comp101632_c0_seq3	CUST_38953_PI429335447	TTTGGCCTAATTGTTTCACCCCTCTTCATCTTGTTGCAGCTGCTCATGATACGAGCATGT	XP_003440136	ENSDART00000074740	alad	delta-aminolevulinic acid dehydratase	GO:0046872,GO:0006779,GO:0004655,GO:0015994	NA	NA	M_beryllina_05_2013_comp101632_c0_seq3
M_beryllina_05_2013_comp101635_c0_seq2	CUST_27877_PI429335447	AACTGGGACGTGAAGAGAAGGAGCAAAGAGAACCTCCTGAAATCAGTCGAAAAGTCTTAA	XP_004563599	ENSDART00000123203	vbp1	prefoldin subunit 3-like	GO:0006457,GO:0016272,GO:0051082	NA	NA	M_beryllina_05_2013_comp101635_c0_seq2
M_beryllina_05_2013_comp101644_c0_seq1	CUST_19525_PI429335447	TTTCCACCAACTTTCTACCAGCCTAAACCTGGTGATAAGCCTATTCCAGTTGAGGTGAAG	XP_003962394	ENSDART00000044115	med6	mediator of rna polymerase ii transcription subunit 6	GO:0006357,GO:0001104,GO:0016592	NA	NA	M_beryllina_05_2013_comp101644_c0_seq1
M_beryllina_05_2013_comp101645_c0_seq1	CUST_28006_PI429335447	ACCGACTTCCTGGTCCGCCCCTTCATGGACAACCTGGCCGCGCACCAGTTCTACATCTGA	XP_004576312	ENSDART00000006381	psen2	presenilin2 homolog	GO:0045121,GO:0060070,GO:0043198,GO:0034205,GO:0007219,GO:0000139,GO:0031594,GO:0043085,GO:0061053,GO:0030426,GO:0051563,GO:0035253,GO:0045296,GO:0006816,GO:0005743,GO:0005789,GO:0005765,GO:0009986,GO:0006509,GO:0030318,GO:0001946,GO:0007420,GO:0016485,GO:0007220,GO:0043025,GO:0030424,GO:0004190,GO:0036269,GO:0030018,GO:0048471,GO:0022008,GO:0005887,GO:0005634,GO:0016324,GO:0005938,GO:0035556	NA	NA	M_beryllina_05_2013_comp101645_c0_seq1
M_beryllina_05_2013_comp101648_c0_seq5	CUST_3769_PI429335447	ATGTACAGAACTACAAGGTCCTCTATGATGCAGCCAATGATCAACTCAGGAATGGGCATG	ACL98117	ENSDART00000047525	cryba1l1	beta-crystallin a3-like	GO:0003674,GO:0008150,GO:0005575	NA	NA	M_beryllina_05_2013_comp101648_c0_seq5
M_beryllina_05_2013_comp101648_c0_seq7	CUST_3772_PI429335447	TCACTGTGGGGAGTACAAACACTTCAGGGAGTTTGGCTCCCACTGCCAGACCCCTCAGAT	AEB31323	ENSDART00000046172	cryba4	beta-crystallin a4-like	GO:0003674,GO:0008150,GO:0005575	NA	NA	M_beryllina_05_2013_comp101648_c0_seq7
M_beryllina_05_2013_comp101652_c0_seq1	CUST_34732_PI429335447	AGTCATGGTAGTTCATCCAGGCATCATCCTCATCCGCACCATCAGCAGCAGCAGCAGCAG	XP_004538249	ENSDART00000017684	KCNN2	small conductance calcium-activated potassium channel protein 2-like isoform x1	0	NA	NA	M_beryllina_05_2013_comp101652_c0_seq1
M_beryllina_05_2013_comp101656_c0_seq1	CUST_17428_PI429335447	AAATGCACAAGAAGGTGGTTGATGGAGCTTACGAGGTTATCAAGCTGAAGGGCTACACTT	AAA99462	ENSDART00000059886	ldha	lactate dehydrogenase-a	GO:0005737,GO:0044262,GO:0004459,GO:0006096,GO:0001666,GO:0055114,GO:0006094,GO:0006534	NA	NA	M_beryllina_05_2013_comp101656_c0_seq1
M_beryllina_05_2013_comp101658_c0_seq3	CUST_42742_PI429335447	TCACCAGAGGCACGACTGCTTTCACTGCAAAAGAAGCTACCTGCTGCAGAGGGAGCTGGA	XP_003201730	ENSDART00000131040	PEG3 (21 of 51)	zinc finger protein 484-like	GO:0003676,GO:0008150,GO:0008270,GO:0005622	NA	NA	M_beryllina_05_2013_comp101658_c0_seq3
M_beryllina_05_2013_comp101659_c0_seq3	CUST_28315_PI429335447	AAATGTCAGAGATGTATTTCAAGGTCCCACAAAAGCCCAGCTCCATTAGACATGGAGGAG	XP_004551438	ENSDART00000128704	GPR156	probable g-protein coupled receptor 156-like	GO:0044699,GO:0050896	NA	NA	M_beryllina_05_2013_comp101659_c0_seq3
M_beryllina_05_2013_comp101660_c0_seq3	CUST_895_PI429335447	GTGTGGGACAGATACATGGGCGTCGTCAAAAGCTGTATCTTCAAAATGTACCACGACTAA	XP_003444664	ENSDART00000020936	fibpa	acidic fibroblast growth factor intracellular-binding	GO:0007368,GO:0060271,GO:0070121,GO:0005634,GO:0060026,GO:0017134	NA	NA	M_beryllina_05_2013_comp101660_c0_seq3
M_beryllina_05_2013_comp101662_c1_seq4	CUST_31405_PI429335447	AGATCCTCTGTGTCAAAGCAGTCATCCTCAGAGTCCAATAATAACTCCCTGAGCAGAGAA	ACQ58109	ENSDART00000126835	rassf4	ras association domain-containing protein 2-like	GO:0007165	NA	NA	M_beryllina_05_2013_comp101662_c1_seq4
M_beryllina_05_2013_comp101664_c0_seq4	CUST_34216_PI429335447	TCTCCAGTCGATAAAGAGGGATATCTACTCAAGAAGAAAGAGCGAAATGCCACCTTCCAG	XP_004071290	ENSDART00000075270	zgc:153733	sesquipedalian-1-like	GO:0005543	NA	NA	M_beryllina_05_2013_comp101664_c0_seq4
M_beryllina_05_2013_comp101668_c0_seq2	CUST_30079_PI429335447	TGTGATTGAAGCCCTCAAATATTTCATCCAGGGCATGGGATACTTGTCCAGTGCCAGTAT	XP_004077721	ENSDART00000102896	ndrg1a	protein ndrg1-like	0	NA	NA	M_beryllina_05_2013_comp101668_c0_seq2
M_beryllina_05_2013_comp101672_c1_seq2	CUST_31330_PI429335447	TTTTCTTTACGTTGTCAGTCTTATTCCCGCATTGCCAACATGGCCTCAGATGACATCGCT	CBN81206	ENSDART00000088610	rangap1a	ran gtpase-activating protein 1-like	GO:0005098,GO:0032853	NA	NA	M_beryllina_05_2013_comp101672_c1_seq2
M_beryllina_05_2013_comp101676_c0_seq2	CUST_22534_PI429335447	TGGAACAACGGACACCAGGTTCTCTACAACGTCACACTCTTCCAGGTTATTAAGACTTCT	XP_004552172	ENSDART00000109894	olfm2a	noelin-2-like isoform x2	GO:0014032	NA	NA	M_beryllina_05_2013_comp101676_c0_seq2
M_beryllina_05_2013_comp101678_c2_seq1	CUST_12382_PI429335447	AAACGATAACAAGCTGCTTGTGTGGAACCACTCCAGCGTCCTGCCCGTGCAGCAGTACAC	XP_003438239	ENSDART00000015891	fzr1	fizzy-related protein homolog isoform 2	GO:0051301	NA	NA	M_beryllina_05_2013_comp101678_c2_seq1
M_beryllina_05_2013_comp101679_c0_seq1	CUST_20272_PI429335447	ATCAAGAACATTCAGAAGATCACAAAATCCATGAAGATGGTGGCCGCTGCCAAGTACGCT	XP_003972737	ENSDART00000066930	atp5c1	mitochondrial atp synthase subunit gamma	GO:0045261,GO:0015986,GO:0046961,GO:0046933,GO:0006119	NA	NA	M_beryllina_05_2013_comp101679_c0_seq1
M_beryllina_05_2013_comp101683_c0_seq2	CUST_30835_PI429335447	TATCATGTGCCAGAGTCAGACTACAGCAACAATATTGTGCGCTGCGATGTCCAATACACT	XP_003444548	ENSDART00000016317	lox	protein-lysine 6-oxidase-like	GO:0007517,GO:0005507,GO:0016641,GO:0022008,GO:0055114,GO:0051216	NA	NA	M_beryllina_05_2013_comp101683_c0_seq2
M_beryllina_05_2013_comp101683_c0_seq3	CUST_19015_PI429335447	AAATGTGAGAGATTACGACACTCGCATGCTGCTGAGATTTCCTCAGAGAGTCAAGAACCA	XP_004074853	ENSDART00000016317	lox	lysyl oxidase	GO:0007517,GO:0005507,GO:0016641,GO:0022008,GO:0055114,GO:0051216	NA	NA	M_beryllina_05_2013_comp101683_c0_seq3
M_beryllina_05_2013_comp101686_c0_seq2	CUST_3973_PI429335447	TGAGTACGAGAAAGTCATTCTAAAAAACTATCAAGACATGGTGGTGGAGGGCTGCGGTTG	XP_004542212	ENSDART00000131169	bmp2b	bone morphogenetic protein 2	GO:0008083,GO:0040007,GO:0042664,GO:0055015,GO:0006461,GO:0048264,GO:0005125,GO:0051216,GO:0005615,GO:0030903,GO:0001503,GO:0046982,GO:0060030,GO:0060876,GO:0007368,GO:0045168,GO:0001710,GO:0042803,GO:0001889,GO:0030509,GO:0008283	NA	NA	M_beryllina_05_2013_comp101686_c0_seq2
M_beryllina_05_2013_comp101692_c0_seq2	CUST_29173_PI429335447	TTCGTCCTCTCATTCTTCTACTATCTCTACTGTGTGTGGAACCTGGAAATATCCCTCTAA	XP_004573723	ENSDART00000020997	cnih3	protein cornichon homolog 2-like	GO:0016021,GO:0035556	NA	NA	M_beryllina_05_2013_comp101692_c0_seq2
M_beryllina_05_2013_comp101693_c0_seq1	CUST_8650_PI429335447	TTTTTGACCAAGGAGCTTGGCCTCACAGAAGACAGGATTGTTATTGTTTTCCATGCGCTG	AGA12056	ENSDART00000065772	ddt	d-dopachrome decarboxylase	GO:0048839,GO:0043066	NA	NA	M_beryllina_05_2013_comp101693_c0_seq1
M_beryllina_05_2013_comp101695_c0_seq3	CUST_32953_PI429335447	ATTGAGGAGTGCAACAAGCACGGGGGAGTTGTTCACATCTATGTTGATAAGAATTCAGCT	XP_004070573	ENSDART00000061328	rbm39b	rna-binding protein 39-like	GO:0003723,GO:0006397,GO:0005634,GO:0000166	NA	NA	M_beryllina_05_2013_comp101695_c0_seq3
M_beryllina_05_2013_comp101701_c0_seq1	CUST_1648_PI429335447	ACTCTACTTGGTCTTTCTCAGTGGAGTGGAGTATGATGTCATCTTTTGCGATCAGGTGTC	XP_004077911	ENSDART00000103257	alg2	alg2 protein	GO:0033164,GO:0005634,GO:0009058,GO:0004378,GO:0000136	NA	NA	M_beryllina_05_2013_comp101701_c0_seq1
M_beryllina_05_2013_comp101705_c0_seq3	CUST_4210_PI429335447	CGGTGCTTGTGTCACTTTCAACGTGTCAGAAAACATCAGAGATCTCTTTCAACTAATTGA	XP_004543208	ENSDART00000090867	btbd10a	btb poz domain-containing protein 10-like	0	NA	NA	M_beryllina_05_2013_comp101705_c0_seq3
M_beryllina_05_2013_comp101711_c0_seq1	CUST_40333_PI429335447	TGATGATGTCGGGGGATAAGGGGATCTCGGCCTTCCCAGAGTCGGACAACCTCTTCAAGT	ACN09931	ENSDART00000083679	ube2c	ubiquitin-conjugating enzyme e2 c	GO:0004842,GO:0016567	NA	NA	M_beryllina_05_2013_comp101711_c0_seq1
M_beryllina_05_2013_comp101718_c0_seq3	CUST_38686_PI429335447	TACTATGAAAACTACCAAGACCCCTCGACGAGTAAGGATGAGGAGACGGTAAAGAAGGAA	XP_003967318	ENSDART00000126879	CU207301.11	transmembrane emp24 domain-containing protein 6-like	GO:0006810,GO:0016021	NA	NA	M_beryllina_05_2013_comp101718_c0_seq3
M_beryllina_05_2013_comp101723_c0_seq1	CUST_17224_PI429335447	AGATACACCTCCAGCCTCGTCTTCACCGTTTCCACCGCTTACATCAAAGTGTGGGACATC	XP_004553975	ENSDART00000121942	KIF21A (3 of 3)	kinesin-like protein kif21a-like	GO:0043234,GO:0044430,GO:0000166,GO:0015630	NA	NA	M_beryllina_05_2013_comp101723_c0_seq1
M_beryllina_05_2013_comp101725_c0_seq3	CUST_22363_PI429335447	TCTAGGCTCAGAAGGGACTCACTCTGCAGGTGACCTTTCAAATTCTTACACATACGCATA	XP_004545419	ENSDART00000114079	nab2	ngfi-a-binding protein 2-like	GO:0045892,GO:0005634	NA	NA	M_beryllina_05_2013_comp101725_c0_seq3
M_beryllina_05_2013_comp101726_c0_seq2	CUST_38692_PI429335447	AAGAAATGCTTTATAGAGGAAATCCCGGACGAGACGATGATTATTGGGAACTACCGGACC	XP_004552100	ENSDART00000020582	tmed9	transmembrane emp24 domain-containing protein 9 precursor	GO:0006810,GO:0016021	NA	NA	M_beryllina_05_2013_comp101726_c0_seq2
M_beryllina_05_2013_comp101727_c0_seq1	CUST_25216_PI429335447	TTGTATGGAGACGAGCCCCTAAAGGACTATTACACACTAATGGACATCGCCTACTTCTAC	XP_004538791	ENSDART00000129554	bmi1a	polycomb complex protein bmi-1-a	GO:0031519,GO:0046872,GO:0021549,GO:0006351	NA	NA	M_beryllina_05_2013_comp101727_c0_seq1
M_beryllina_05_2013_comp101729_c1_seq5	CUST_34969_PI429335447	AGCTGTCTCATAGCTCTCACTCTTCACTGCTTCTCTCTTCAGTCCCTCTGCTTAATATAG	ABK63240	ENSDART00000060735	slc24a1	sodium potassium calcium exchanger 2-like	GO:0055085,GO:0016021	NA	NA	M_beryllina_05_2013_comp101729_c1_seq5
M_beryllina_05_2013_comp101731_c0_seq1	CUST_15580_PI429335447	AACAAGAAGTTCTAAGGTGCCTTCTCTGGCTGAATATGTCCGCTCTAACCATCCATACGA	XP_004066125	ENSDART00000076464	zgc:63972	homolog precursor	GO:0010038	NA	NA	M_beryllina_05_2013_comp101731_c0_seq1
M_beryllina_05_2013_comp101734_c0_seq1	CUST_7063_PI429335447	TGAAACTGTGTGAGGGATTCAGCGAGGTGCTCAAACAGTGCAAGTTTGCTAATGGTATGT	XP_003968518	ENSDART00000082388	chchd2	coiled-coil-helix-coiled-coil-helix domain-containing protein mitochondrial-like	0	NA	NA	M_beryllina_05_2013_comp101734_c0_seq1
M_beryllina_05_2013_comp101739_c0_seq1	CUST_12898_PI429335447	TTGACAAAAAGCCAAAAAGCATTGAGGTGACACTCTCCAGTAAGCCTCAGGAGGAGCAAA	XP_004540024	ENSDART00000085719	si:ch211-10a23.2	galectin-related protein b-like	GO:0030246	NA	NA	M_beryllina_05_2013_comp101739_c0_seq1
M_beryllina_05_2013_comp101741_c0_seq1	CUST_21757_PI429335447	ATCACATTTGAGAAGATGGAATCTGCAGACCAAGCTGTGGCTGAGTTGAATGGAAGCATG	XP_004073808	ENSDART00000113250	nelfe	negative elongation factor e	GO:0003746,GO:0008017,GO:0000166,GO:0042384,GO:0048793,GO:0005840,GO:0006448,GO:0045298	NA	NA	M_beryllina_05_2013_comp101741_c0_seq1
M_beryllina_05_2013_comp101743_c0_seq1	CUST_31174_PI429335447	TTCACCAAGTTCAACGCCTGCGACTTTGACGAGATGATGGCGGAGAAGCGTCTGATCCCG	XP_003454286	ENSDART00000131860	rpl10	qm-like protein	GO:0005840,GO:0003735,GO:0016787,GO:0005634,GO:0006412,GO:0042254	NA	NA	M_beryllina_05_2013_comp101743_c0_seq1
M_beryllina_05_2013_comp101755_c0_seq2	CUST_4510_PI429335447	TTCAAAAAGCTCGCTGAGATGTACGGCGTCCTGGAGACAAACAGCCCTCCCATGTGGTAG	CBN82189	ENSDART00000030547	cdh7	cadherin-20-like isoform x1	GO:0016021,GO:0007156,GO:0005509,GO:0005886	NA	NA	M_beryllina_05_2013_comp101755_c0_seq2
M_beryllina_05_2013_comp101757_c0_seq1	CUST_28600_PI429335447	TTCCTGTTTGAGGAGGAGAAGCTTTTTTCCCTCTCTGACCCCCAGCAGGAGGAGAAGGCG	XP_003456767	NA	NA	proenkephalin-a precursor	GO:0007218,GO:0005576,GO:0001515	NA	NA	M_beryllina_05_2013_comp101757_c0_seq1
M_beryllina_05_2013_comp101760_c0_seq1	CUST_31972_PI429335447	CGATACTACACAGAGTTTGACCGTCACAATAATCGGATAGGCTTTGCAACAGCAGTCTGA	XP_003439054	ENSDART00000061336	ren	renin precursor	GO:0009617,GO:0003406,GO:0004190,GO:0006508	NA	NA	M_beryllina_05_2013_comp101760_c0_seq1
M_beryllina_05_2013_comp101761_c0_seq1	CUST_26056_PI429335447	TCATCCTGCTGCTGCTGCTCATTTCCTTTCTGTTGTATTATGTCTACCAGAGCAGTCTGA	XP_003444607	NA	NA	PREDICTED: hypothetical protein LOC100701997	0	NA	NA	M_beryllina_05_2013_comp101761_c0_seq1
M_beryllina_05_2013_comp101763_c0_seq1	CUST_41374_PI429335447	TTTTTTGTAAGAGGAGGGAAGTACATTTGGAGCAAAGCTGACATGAAGTTGGAATGGTGA	ABO48457	ENSDART00000019617	rsad2	viperin	GO:0005789,GO:0046872,GO:0051607,GO:0045087,GO:0005811,GO:0051539,GO:0008152,GO:0003824	NA	NA	M_beryllina_05_2013_comp101763_c0_seq1
M_beryllina_05_2013_comp101776_c0_seq2	CUST_15805_PI429335447	GATCTAAAATGTCTCCTAGGACGCTTCAGAAAACAAAAATCTGGCCAAATGCCGAAAAAA	CAS01987	NA	NA	il-6 subfamily member m17	GO:0005125,GO:0006955,GO:0005576	NA	NA	M_beryllina_05_2013_comp101776_c0_seq2
M_beryllina_05_2013_comp101778_c0_seq7	CUST_19336_PI429335447	AAGTCACAATGGAAATGCCTGTGAGGCAGCCTCCCTGAGTGGAGCAGTGGTGTCACTGCT	XP_003452253	NA	NA	maternal embryonic leucine zipper kinase-like	0	NA	NA	M_beryllina_05_2013_comp101778_c0_seq7
M_beryllina_05_2013_comp101780_c0_seq2	CUST_25576_PI429335447	GCTGTGCCATAAGAAGTTCACCAGGAACGACTACCTCAAAGTACATATGGAGAATGTCCA	XP_003439830	ENSDART00000127443	prdm5	pr domain zinc finger protein 5	GO:0008270,GO:0005622,GO:0006355,GO:0060828,GO:2000050,GO:0000976	NA	NA	M_beryllina_05_2013_comp101780_c0_seq2
M_beryllina_05_2013_comp101781_c0_seq3	CUST_24058_PI429335447	AGGCGTAAAGTTACGATTCCACCGGCCCTGGCTTTTGGTGAAAAGGGCAAAGCCCTGTAG	CAG08293	ENSDART00000019780	fkbp7	peptidyl-prolyl cis-trans isomerase fkbp7-like	GO:0006457,GO:0005528,GO:0005509,GO:0000413,GO:0016020,GO:0005783,GO:0003755	NA	NA	M_beryllina_05_2013_comp101781_c0_seq3
M_beryllina_05_2013_comp101786_c0_seq2	CUST_32086_PI429335447	TCACGGGGAACGTGATCATAGAGACCAAGTTCTTCGACGAGGACCTCCACGTGAGCACCT	ACM09165	ENSDART00000114172	pde6d	retinal rod rhodopsin-sensitive cgmp 3 -cyclic phosphodiesterase subunit delta-like	GO:0048856,GO:0004114,GO:0007601,GO:0006144	NA	NA	M_beryllina_05_2013_comp101786_c0_seq2
M_beryllina_05_2013_comp101789_c0_seq1	CUST_28303_PI429335447	TAACTGTTTGGACATGCTTACCTTTTTGGGAAGGAGAACCTGCAATATCTGCTTGCCAGG	XP_004546951	ENSDART00000080989	GPR141 (1 of 2)	probable g-protein coupled receptor 141-like	GO:0004871,GO:0007165	NA	NA	M_beryllina_05_2013_comp101789_c0_seq1
M_beryllina_05_2013_comp101795_c1_seq2	CUST_39811_PI429335447	TAAACACTTCTGCGAGTCCATGGGCGGATCAAAGTACCGCTGGTTCCACAACGCCTGCTG	ACO09781	ENSDART00000049963	twsg1a	twisted gastrulation protein homolog 1-a precursor	GO:0035162,GO:0048264,GO:0030513,GO:0005576,GO:0001568	NA	NA	M_beryllina_05_2013_comp101795_c1_seq2
M_beryllina_05_2013_comp101797_c0_seq2	CUST_9646_PI429335447	GACAAGAATGACATTTTTGCCATTGGATCTCTGATGGATGATTACCTGGGTCTTGTCAGC	ACQ58615	ENSDART00000054143	eef1g	---NA---	0	NA	NA	M_beryllina_05_2013_comp101797_c0_seq2
M_beryllina_05_2013_comp101800_c0_seq1	CUST_10849_PI429335447	GGCTATGAATTAGAGGGACCTTATATGGTGAAGAGCTTAAATGGTCCACGAATGGATTGA	XP_004083723	ENSDART00000061557	elp3	elongator complex protein 3-like	GO:0045859,GO:0051536,GO:0006357,GO:0046872,GO:0008607,GO:0008023,GO:0007409,GO:0004402,GO:0005737,GO:0000123,GO:0042967	NA	NA	M_beryllina_05_2013_comp101800_c0_seq1
M_beryllina_05_2013_comp101805_c0_seq6	CUST_38410_PI429335447	ATTTTTCCATAACCAAACGAGCACACACCCCCACTCCTGGAATCTATATGGGACGCCCAA	BAD24698	ENSDART00000021266	tra2b	transformer-2 protein homolog beta-like	GO:0003676,GO:0000166	NA	NA	M_beryllina_05_2013_comp101805_c0_seq6
M_beryllina_05_2013_comp101809_c0_seq1	CUST_2503_PI429335447	TAACTTTGAAAAGGCCTACTTCATTTTAGACGAGTTCCTGATGGGGGGAGAGATCCAGGA	AAH70003	ENSDART00000101109	ap1s1	ap-1 complex subunit sigma-1a-like	GO:0005886,GO:0030117,GO:0007399,GO:0008565,GO:0016192,GO:0006886,GO:0030198,GO:0048471	NA	NA	M_beryllina_05_2013_comp101809_c0_seq1
M_beryllina_05_2013_comp101810_c0_seq1	CUST_6085_PI429335447	GAAGTTGACAAGATTCTCTTTGAGATTACAGCAGGTGCCCTGGGCAAAGCACCAAACAAA	XP_004082340	ENSDART00000055487	chmp3	charged multivesicular body protein 3	GO:0015031,GO:0005829,GO:0031902	NA	NA	M_beryllina_05_2013_comp101810_c0_seq1
M_beryllina_05_2013_comp101811_c0_seq1	CUST_7858_PI429335447	AGGCTGCTCCACCACGTGTGCTTCTTCTCCTGCCTGGCGGCCATGTTGTTCTGCTACTCC	XP_004075557	NA	NA	c-x-c chemokine receptor type 5-like	GO:0004871,GO:0007165,GO:0002376	NA	NA	M_beryllina_05_2013_comp101811_c0_seq1
M_beryllina_05_2013_comp101817_c0_seq1	CUST_38137_PI429335447	GGGGAGAGTTACGAAGGTAAGGAGACTGGATTTACTTCTTCAAAAATGATTGATGAAAAT	XP_004070009	ENSDART00000093279	spi1b	transcription factor -like	GO:0006355,GO:0043565,GO:0005634,GO:0003700,GO:0003677	NA	NA	M_beryllina_05_2013_comp101817_c0_seq1
M_beryllina_05_2013_comp101817_c0_seq10	CUST_37957_PI429335447	AATTCCCCAGTGAATCATCTGACAGAGCTGCAGGCGGTATCATCTCAACAACTCATACAA	XP_004070009	ENSDART00000093279	spi1b	transcription factor	GO:0010468,GO:0002573,GO:0003677,GO:0030218,GO:0050794	NA	NA	M_beryllina_05_2013_comp101817_c0_seq10
M_beryllina_05_2013_comp101820_c0_seq1	CUST_23821_PI429335447	TATGTTTCTTATCATCTTTACAGCTGGTCGTTGTCAACTAAATGACAGCCGCCGGGCTGT	XP_003447756	NA	NA	parathyroid hormone-related protein precursor	GO:0030282,GO:0048701	NA	NA	M_beryllina_05_2013_comp101820_c0_seq1
M_beryllina_05_2013_comp101825_c0_seq2	CUST_35728_PI429335447	CGGGCCTGCACAGTCATGTTTCCACTCATCTATTCTGAACTCAAGTACCTGGTTTATTAG	XP_003453558	ENSDART00000110994	sqlea	squalene monooxygenase-like	GO:0050660,GO:0003857,GO:0004506,GO:0016021,GO:0055114,GO:0006550,GO:0006552,GO:0006554,GO:0006568,GO:0006574,GO:0006633,GO:0018874,GO:0006694,GO:0016114	NA	NA	M_beryllina_05_2013_comp101825_c0_seq2
M_beryllina_05_2013_comp101826_c0_seq2	CUST_29062_PI429335447	GTGGAAGAAGCCTTGCTCATCACTCGGCATACTAAAGTTAAGGGATTTTATCCTCACAAC	XP_004077373	ENSDART00000127670	bora	protein aurora borealis-like	GO:0007049	NA	NA	M_beryllina_05_2013_comp101826_c0_seq2
M_beryllina_05_2013_comp101827_c1_seq2	CUST_18145_PI429335447	AACAAGATCAAGATGGCCAACCACAACCTGGCGCTCACCATGTCCAAGTCGAAGCGTCCC	XP_004575837	ENSDART00000133065	ldb3a	lim domain-binding protein 3-like isoform x5	GO:0001756,GO:0046872,GO:0007507	NA	NA	M_beryllina_05_2013_comp101827_c1_seq2
M_beryllina_05_2013_comp101827_c1_seq3	CUST_18142_PI429335447	AGTCCTCTCTGCAGCAGGAGGATGAGGAGCAGGTGATGAAGAGGAGCAGCCAGTTCGGGC	XP_004575834	NA	NA	lim domain-binding protein 3-like isoform 2	GO:0046872,GO:0008270,GO:0001756,GO:0007507	NA	NA	M_beryllina_05_2013_comp101827_c1_seq3
M_beryllina_05_2013_comp101831_c0_seq1	CUST_4360_PI429335447	ATTATTGTTTTGCTACCCAAGGTGGTCAACACCAATGACCCAGAGATGAGAAAGGAAATG	XP_004550605	ENSDART00000122313	emc7	c15orf24 homolog precursor	GO:0030246,GO:0072546	NA	NA	M_beryllina_05_2013_comp101831_c0_seq1
M_beryllina_05_2013_comp101834_c0_seq1	CUST_37903_PI429335447	GGTATCAGTGATTTCAAGATTGAGGAGGCCCAAAAGATTACCATAAAGAACACAAGCTAC	XP_004544674	ENSDART00000053001	tcn2l	transcobalamin-2 precursor	GO:0031419,GO:0009235,GO:0015889	NA	NA	M_beryllina_05_2013_comp101834_c0_seq1
M_beryllina_05_2013_comp101835_c0_seq3	CUST_26185_PI429335447	AGTTTTAGACGCCTGGGGAAAACGCATCTTCAGTGAAATCAAGACTTTGCTGCACTCTCA	XP_003447965	ENSDART00000145486	si:ch211-243a20.3	PREDICTED: hypothetical protein LOC100708899	0	NA	NA	M_beryllina_05_2013_comp101835_c0_seq3
M_beryllina_05_2013_comp101839_c0_seq1	CUST_6160_PI429335447	AATGTTAGCATCTACATGTGGGTTATCCTGGCTGCTTTGTCCAGCGGCTCTCTAAGTTTA	XP_004077827	NA	NA	cholecystokinin	GO:0007631,GO:0030252	NA	NA	M_beryllina_05_2013_comp101839_c0_seq1
M_beryllina_05_2013_comp101841_c0_seq2	CUST_2515_PI429335447	TAGCTGGGATTTTACTACAAAGACTCGCTCAACCAATGATGACGGGACCTCACTTGATCT	XP_003451832	ENSDART00000041468	CABZ01003022.1	ap-1 complex-associated regulatory	0	NA	NA	M_beryllina_05_2013_comp101841_c0_seq2
M_beryllina_05_2013_comp101842_c0_seq1	CUST_8347_PI429335447	ACCAATATAATCCTGAACACTGGCCGCATGCACCGGACAGAGTTTTTCCAAAAAGCAAAC	ABK41198	ENSDART00000129828	cyp19a1a	cytochrome p450 aromatase	GO:0020037,GO:0016020,GO:0005506,GO:0009055,GO:0070330,GO:0055114,GO:0006118	NA	NA	M_beryllina_05_2013_comp101842_c0_seq1
M_beryllina_05_2013_comp101843_c0_seq3	CUST_13966_PI429335447	AGAAGAAAAGCAGGTGGTCTCGGATGCACAGATCAGCTTCTGGTAAATCCATCTATGTAG	CBN81300	ENSDART00000076007	gper	g-protein coupled estrogen receptor 1-like	GO:0005886,GO:0030284,GO:0006355,GO:0007165	NA	NA	M_beryllina_05_2013_comp101843_c0_seq3
M_beryllina_05_2013_comp101850_c0_seq1	CUST_24769_PI429335447	TGAACTGCCTGATCGCTCAGATCCAGATGGAGGAGAACGTCAGCGCCTTCTTCTTCCTGC	XP_003457710	ENSDART00000100166	serpinf1	pigment epithelium-derived factor-like	GO:0010951,GO:0005615,GO:0004867,GO:0030162	NA	NA	M_beryllina_05_2013_comp101850_c0_seq1
M_beryllina_05_2013_comp101853_c0_seq4	CUST_17242_PI429335447	CTTCACATTACACATATACCAGTATCGCATGGAAAAGACAGGCAAAGGAGGGATGTCAGG	XP_003454546	ENSDART00000013170	KIF26B	kinesin-like protein kif26b-like	0	NA	NA	M_beryllina_05_2013_comp101853_c0_seq4
M_beryllina_05_2013_comp101856_c1_seq1	CUST_1603_PI429335447	AAATATCCTATTGCCACAAGTTCAGGATGCACACATACCATGTGTCCTGATGTGTTCAGA	XP_003451587	ENSDART00000122370	agxt2	alanine--glyoxylate aminotransferase mitochondrial-like	GO:0030170,GO:0035162,GO:0008483,GO:0008152	NA	NA	M_beryllina_05_2013_comp101856_c1_seq1
M_beryllina_05_2013_comp101859_c0_seq2	CUST_20218_PI429335447	ATCATCAAAATCGGTAGAGGGTTGGATTACTTCAAGAGGCCTAAGGGTCGATTCTCCATC	XP_004551319	ENSDART00000128352	mitd1	mit domain-containing protein 1	GO:0003674,GO:0008150,GO:0005575	NA	NA	M_beryllina_05_2013_comp101859_c0_seq2
M_beryllina_05_2013_comp101860_c0_seq1	CUST_7729_PI429335447	TTGCTGTAGCAATCAACTGTGCCAAACGGGTTGTGAGGGATCCGAACGGCATCGCAGCCT	BAL44624	ENSDART00000080549	lyz	c-type lysozyme	GO:0005576,GO:0019835,GO:0042742,GO:0016998,GO:0003796,GO:0005975	NA	NA	M_beryllina_05_2013_comp101860_c0_seq1
M_beryllina_05_2013_comp101861_c0_seq1	CUST_9124_PI429335447	CCTGAGTCTGGAGAGCACTATGAGATAATGCTGCTGCACTTTCTACAACAATACCTCTGA	XP_003437815	ENSDART00000074495	dpp9	dipeptidyl peptidase 9-like	GO:0016020,GO:0006508,GO:0008236	NA	NA	M_beryllina_05_2013_comp101861_c0_seq1
M_beryllina_05_2013_comp101864_c0_seq1	CUST_39517_PI429335447	TCTCCCAGAGACTTCCTGGCTGGTTTGGCCTACCGAGTCTTCAACTGCACTCAGTACGTC	XP_004571594	ENSDART00000079832	tph2	tryptophan 5-hydroxylase 2-like	GO:0042427,GO:0005506,GO:0004510,GO:0016597,GO:0055114,GO:0006568	NA	NA	M_beryllina_05_2013_comp101864_c0_seq1
M_beryllina_05_2013_comp101864_c0_seq3	CUST_39523_PI429335447	TTTGTGTCCGAGAGCTTCGAGGAGGCCAAGGAGAAGATGAGGGAGTTTGCCCGGGGTATA	XP_004571596	ENSDART00000112627	tph2	tryptophan hydroxylase 2	GO:0042427,GO:0005506,GO:0004510,GO:0016597,GO:0055114,GO:0006568	NA	NA	M_beryllina_05_2013_comp101864_c0_seq3
M_beryllina_05_2013_comp101875_c1_seq1	CUST_13546_PI429335447	GTCAACGGCATCAATCTGACCAAACTGCGGCACGAGGAGATCATCAGCCTGCTGAAGAAC	XP_003447737	ENSDART00000092447	grip2b	glutamate receptor-interacting protein 2-like	0	NA	NA	M_beryllina_05_2013_comp101875_c1_seq1
M_beryllina_05_2013_comp101876_c0_seq1	CUST_25045_PI429335447	AAGCCACTCGCAGGAGCTCCTGAAGATCAAAACCGAACCCCCGGACATGCTCGGTTTGTT	XP_004070357	ENSDART00000114340	plagl2	---NA---	0	NA	NA	M_beryllina_05_2013_comp101876_c0_seq1
M_beryllina_05_2013_comp101880_c0_seq2	CUST_38617_PI429335447	TCCTCTATATCCTCTGCACAATGTCCATCAGACAGAACATTCAGAAGATGCTTGGACTTG	ACQ58430	ENSDART00000100276	tmco1	transmembrane and coiled-coil domain-containing protein 1	GO:0016021	NA	NA	M_beryllina_05_2013_comp101880_c0_seq2
M_beryllina_05_2013_comp101883_c0_seq1	CUST_20176_PI429335447	TTGTCTTTCCAGAACAAAAGAGGAGGGCGCATCTTCTTCCAGGATGTCAAGAAACCTGAA	ACY75476	ENSDART00000044238	zgc:92066	middle subunit-like	GO:0006879,GO:0016491,GO:0008199,GO:0006826,GO:0055114	NA	NA	M_beryllina_05_2013_comp101883_c0_seq1
M_beryllina_05_2013_comp101884_c0_seq4	CUST_28942_PI429335447	AAAGTGGAGATTGCCACTCTGACGCGGGAAGATGGAAAAACAAAAATCAAGGTGCTGAAG	XP_003450834	ENSDART00000067512	psma4	proteasome subunit alpha type-4	GO:0005737,GO:0019773,GO:0006511,GO:0005634,GO:0004298	NA	NA	M_beryllina_05_2013_comp101884_c0_seq4
M_beryllina_05_2013_comp101887_c0_seq2	CUST_7885_PI429335447	AAGCAGCAGAAGCAGCAGCTGGTCTACATGCTCAACCTGCACCGGCCCACCTGCATCGTG	XP_003446694	ENSDART00000022060	atf3	cyclic amp-dependent transcription factor atf-3	GO:0003700,GO:0043565,GO:0009615,GO:0006355,GO:0005667,GO:0045449	NA	NA	M_beryllina_05_2013_comp101887_c0_seq2
M_beryllina_05_2013_comp101888_c0_seq5	CUST_35512_PI429335447	AAAGAGAAGACGGAAAAAATATCCCAAGCTCATCGGTTACACCACCTCCTCAGTACAAAG	XP_004539579	ENSDART00000076596	spata17	spermatogenesis-associated protein 17-like	0	NA	NA	M_beryllina_05_2013_comp101888_c0_seq5
M_beryllina_05_2013_comp101891_c0_seq1	CUST_13183_PI429335447	GTGCAGAAAGAGGCAGTGATCAGGTGTCAGGACGTGGTTTCTTTCACTTTTGATGTATGA	XP_004543716	ENSDART00000060098	GEMIN7	gem-associated protein 7	GO:0032797	NA	NA	M_beryllina_05_2013_comp101891_c0_seq1
M_beryllina_05_2013_comp101892_c0_seq1	CUST_13945_PI429335447	TTTATCTCATACTGGATACTGGGTCTTGCACTACATTGCAACTTTTTGCCATGGACATGA	XP_003452155	ENSDART00000130540	pigv	gpi mannosyltransferase 2-like	GO:0006506,GO:0016758	NA	NA	M_beryllina_05_2013_comp101892_c0_seq1
M_beryllina_05_2013_comp101896_c0_seq2	CUST_13123_PI429335447	ATCAGAATCAGTATTTTATAAGGGCGTTTACTACCAGACGGGCGACGTGATCAAGGTGAC	XP_004548189	ENSDART00000051712	gatad1	gata zinc finger domain-containing protein 1	GO:0003700,GO:0043565,GO:0008270,GO:0006355,GO:0005667,GO:0045449	NA	NA	M_beryllina_05_2013_comp101896_c0_seq2
M_beryllina_05_2013_comp101901_c0_seq3	CUST_39688_PI429335447	TCCTGTGTTGATACTAAGGAATCCATGACCCACCTGGATATCATCTTTATGGACAATCCA	ABV22578	NA	NA	tumor necrosis factor ligand superfamily member 18	GO:0055113,GO:0005164,GO:0005615,GO:0005125,GO:0016020,GO:0042517,GO:0006955	NA	NA	M_beryllina_05_2013_comp101901_c0_seq3
M_beryllina_05_2013_comp101905_c0_seq1	CUST_26368_PI429335447	CACCAGAAAACAGAATGAAACACAATTACTACAAAACAGGGGCAGATGGATCAGAGAAAC	XP_004538119	NA	NA	PREDICTED: nipped-B-like protein-like	0	NA	NA	M_beryllina_05_2013_comp101905_c0_seq1
M_beryllina_05_2013_comp101905_c2_seq2	CUST_6427_PI429335447	ATAACGACGTTCCTGATGGCCGTGAACCTGTGGACCTCCTACAGCCTGGTCTGTGGCCCC	XP_004078599	ENSDART00000029492	cmtm7	cklf-like marvel transmembrane domain-containing protein 7	GO:0016021	NA	NA	M_beryllina_05_2013_comp101905_c2_seq2
M_beryllina_05_2013_comp101906_c0_seq1	CUST_25657_PI429335447	AACGGCAGGGCCCCCGCGGGCTCGGTGAAGGTGGTCCAGGGGGGCCAGGCCCAGACCTAC	XP_004565033	NA	NA	PREDICTED: desmoglein-2-like	0	NA	NA	M_beryllina_05_2013_comp101906_c0_seq1
M_beryllina_05_2013_comp101907_c0_seq1	CUST_19612_PI429335447	AAGTGCTGATGCCCGCGACCACTGAAGTTAAGACTACTAAATGGGACTTCTACTGTAACT	XP_004564122	ENSDART00000074290	MIA	melanoma-derived growth regulatory	GO:0003674,GO:0008150,GO:0005575	NA	NA	M_beryllina_05_2013_comp101907_c0_seq1
M_beryllina_05_2013_comp101912_c0_seq2	CUST_37861_PI429335447	AATTAATGCACCGATTCGCTCGACAGCCTTCGAGAGAAAAGTTCAGTTTCTCGGAAAGAA	XP_003961867	ENSDART00000099693	trappc2	trafficking protein particle complex subunit 2	GO:0006888,GO:0005783,GO:0048471,GO:0005794	NA	NA	M_beryllina_05_2013_comp101912_c0_seq2
M_beryllina_05_2013_comp101916_c0_seq2	CUST_13720_PI429335447	ATTGCAAACCCAGCAGAACTTGACGCTCTGATGGATGAAGTAGCCTATGAGAGATACATC	XP_003440437	ENSDART00000013682	gcsha	glycine cleavage system h mitochondrial precursor	GO:0005960,GO:0019464	NA	NA	M_beryllina_05_2013_comp101916_c0_seq2
M_beryllina_05_2013_comp101918_c0_seq1	CUST_2824_PI429335447	TTCTGGATTTATCAGGATTAACGCTGTCAGGCTAAGGGAACATAACCGTTTGCAGGGCTT	XP_004074802	ENSDART00000039903	ass1	argininosuccinate synthase-like	GO:0055085,GO:0006526,GO:0016021,GO:0022891,GO:0000050,GO:0005524,GO:0004055,GO:0006522,GO:0006531,GO:0006560	NA	NA	M_beryllina_05_2013_comp101918_c0_seq1
M_beryllina_05_2013_comp101926_c0_seq2	CUST_13171_PI429335447	ATGTTCGCTGTCAATGGAATCCTCTTTAACCACGAGAGCCCGAGAAGAGGTTCAAACTTT	XP_004068167	ENSDART00000046764	gmds	gdp-mannose dehydratase-like	GO:0021744,GO:0070401,GO:0021564,GO:0008446,GO:0005622,GO:0007219,GO:0010842,GO:0008417,GO:0036065,GO:0042351,GO:0006000,GO:0006012,GO:0009298	NA	NA	M_beryllina_05_2013_comp101926_c0_seq2
M_beryllina_05_2013_comp101928_c1_seq1	CUST_38653_PI429335447	AGCCAACATGGAGAACAAACTCTTTGAGAAGCCAACAACTGCTCCATCTTCCTCTGCAAA	XP_004553716	ENSDART00000086867	tapt1b	transmembrane anterior posterior transformation protein 1 homolog	0	NA	NA	M_beryllina_05_2013_comp101928_c1_seq1
M_beryllina_05_2013_comp101932_c0_seq1	CUST_31327_PI429335447	TACACAAAGAACGGCCACAGCCTAGGTATTGCCTTCACAGACCTACCACCCAACTTGTAC	BAI63636	ENSDART00000086608	ranbp9	ran binding protein 9	GO:0005634,GO:0005737	NA	NA	M_beryllina_05_2013_comp101932_c0_seq1
M_beryllina_05_2013_comp101932_c0_seq2	CUST_31342_PI429335447	ATGCTCAAGGTGAGGCAGTTCATAGAGATGGTGAACGGGACGGACAGTGAGGTCCGGTGT	ACN11032	ENSDART00000086608	ranbp9	ran-binding protein 9	GO:0005634,GO:0005737	NA	NA	M_beryllina_05_2013_comp101932_c0_seq2
M_beryllina_05_2013_comp101932_c0_seq3	CUST_31336_PI429335447	TGATACAGGAGGACCAGATGTCCATAAAGAACAGACAAAGAATACAGAAGCTGGTGCTGG	CAK05294	ENSDART00000146261	ranbp10	ran-binding protein 10-like	GO:0005634,GO:0005737	NA	NA	M_beryllina_05_2013_comp101932_c0_seq3
M_beryllina_05_2013_comp101935_c0_seq2	CUST_21271_PI429335447	CTGGATTACAAAAACCTGGTGCATATCATTACTCACGGAGAGGAAAAGGACCAGGAGTAG	XP_003441604	ENSDART00000008823	MYL2 (1 of 2)	myosin regulatory light chain ventricular cardiac muscle isoform-like	GO:0005509	NA	NA	M_beryllina_05_2013_comp101935_c0_seq2
M_beryllina_05_2013_comp101936_c0_seq1	CUST_358_PI429335447	AAAGTCCATGAAGTTCGTGGACGGCCTGATGATCCACAGCGGGGACCCCGTCAACTACTA	BAF45890	ENSDART00000067803	rps3	40s ribosomal protein s3	GO:0009790,GO:0003735,GO:0003723,GO:0015935,GO:0006412,GO:0042254	NA	NA	M_beryllina_05_2013_comp101936_c0_seq1
M_beryllina_05_2013_comp101938_c0_seq2	CUST_13876_PI429335447	AAGAAGATGCTGGATGTAGCCAACATGTTGGGACTCTCTAACACAGTGATGAGACTCATC	XP_003964832	ENSDART00000075039	gosr2	golgi snap receptor complex member 2-like	GO:0005795,GO:0006810	NA	NA	M_beryllina_05_2013_comp101938_c0_seq2
M_beryllina_05_2013_comp101944_c0_seq2	CUST_12385_PI429335447	CTCTACAAAAAAGCCAACGCACAGAAGCCCAGCAAAAAGAAATCGAAAGATAAGAAGAGC	XP_004544947	ENSDART00000053776	fkbp11	fk506-binding protein 11 precursor	GO:0006457,GO:0000413,GO:0016020,GO:0003755,GO:0042221,GO:0005528	NA	NA	M_beryllina_05_2013_comp101944_c0_seq2
M_beryllina_05_2013_comp101951_c0_seq4	CUST_26119_PI429335447	TTCCTGGTTCTGGAGCTGCTGATCTGCATCACCGCCATGCTGTTCGGGCTCAGCGTGCTG	XP_003455299	NA	NA	PREDICTED: hypothetical protein LOC100704554	0	NA	NA	M_beryllina_05_2013_comp101951_c0_seq4
M_beryllina_05_2013_comp101954_c0_seq2	CUST_9751_PI429335447	GGAAATATTGCTGAAAGAGTACACTCAGAAAGAGAAAGAGGCTCTGCAGGTGTTGTCCCT	XP_004070498	ENSDART00000053876	dnajc22	dnaj homolog subfamily c member 22-like	GO:0045454,GO:0005575	NA	NA	M_beryllina_05_2013_comp101954_c0_seq2
M_beryllina_05_2013_comp101957_c0_seq1	CUST_34810_PI429335447	ATCATGAAGCACGACGGAGGCCTCAGCGAGGAGGTGGCTAAATGCTACTTTGCGCAGATC	XP_004074078	ENSDART00000104323	snrka	snf-related serine threonine-protein kinase-like	GO:0006468,GO:0005524,GO:0060217,GO:0004674,GO:0009069	NA	NA	M_beryllina_05_2013_comp101957_c0_seq1
M_beryllina_05_2013_comp101959_c0_seq2	CUST_24976_PI429335447	TACAACAACCAAAAGGTCATCTTTTTAGAGGATGTCAAACAGGAGGACATGGAGGACGGC	XP_003443235	ENSDART00000036597	plekhf1	pleckstrin homology domain-containing family f member 1	GO:0046872,GO:0005543	NA	NA	M_beryllina_05_2013_comp101959_c0_seq2
M_beryllina_05_2013_comp101960_c0_seq1	CUST_20560_PI429335447	TCCTCAGACCAGGAAGTCTTCCTGCATCCTGACGAGAGAAGCATGAAGCTCCAGTTCCCC	XP_002665685	NA	NA	mitotic checkpoint serine threonine-protein kinase bub1	0	NA	NA	M_beryllina_05_2013_comp101960_c0_seq1
M_beryllina_05_2013_comp101962_c1_seq2	CUST_13987_PI429335447	TCTTTGCAATAAAGACCTACAAGAGGCGGGTGATGAGCCTCTTCAAGGATTACCTCTACA	XP_004081609	ENSDART00000113027	si:ch211-184m13.4	g-protein coupled receptor 183-like	GO:0045028,GO:0016021,GO:0035589,GO:0007187	NA	NA	M_beryllina_05_2013_comp101962_c1_seq2
M_beryllina_05_2013_comp101963_c0_seq1	CUST_11737_PI429335447	ACCAACTATTTCGGTCGGCAGTTCCTCAAACAGGCGCTGTCTAAAGAGGAGGAATCATAG	XP_004566010	ENSDART00000014103	zgc:112148	fam18b	GO:0016021	NA	NA	M_beryllina_05_2013_comp101963_c0_seq1
M_beryllina_05_2013_comp101966_c0_seq2	CUST_39892_PI429335447	TGTCTCAGAGAGTTTCTCCGATGCCAAGGAAAAATTCAGGAGGTATGTAGCTGGCATCAA	XP_003440461	ENSDART00000040410	th	tyrosine hydroxylase	GO:0004511,GO:0042136,GO:0005506,GO:0042416,GO:0055114,GO:0006570	NA	NA	M_beryllina_05_2013_comp101966_c0_seq2
M_beryllina_05_2013_comp101968_c0_seq2	CUST_29131_PI429335447	AGAACTGGAGCCAGAGCCCCACCTCATACATGAGATCTGAGATGAGAGGCCTCCCTAACC	XP_003442489	ENSDART00000040065	casc3	protein casc3-like	GO:0016070,GO:0010467,GO:0044424	NA	NA	M_beryllina_05_2013_comp101968_c0_seq2
M_beryllina_05_2013_comp101972_c0_seq1	CUST_32806_PI429335447	TTGCTAAAGTTGAGCTCAGGCGTCGGGCTGGAACCGGGTTAAGTTCTGTTTGGTGGACCG	XP_004086538	ENSDART00000123145	RNF4	ring finger protein 4	GO:0046872,GO:0008150,GO:0008270,GO:0005575	NA	NA	M_beryllina_05_2013_comp101972_c0_seq1
M_beryllina_05_2013_comp101972_c0_seq4	CUST_22471_PI429335447	TTCTTCACCAGAAGATGGAAAATGCCAAGAAGATGAAGGCCTACGAGAAGCAGAAGCAAG	XP_004562934	ENSDART00000055312	nosip	nitric oxide synthase-interacting protein	GO:0005634,GO:0005737	NA	NA	M_beryllina_05_2013_comp101972_c0_seq4
M_beryllina_05_2013_comp101979_c0_seq1	CUST_33061_PI429335447	CAAGTCAAAAAGCAGAACGGCATGATTCAGATTTCCAACTTCTACATCAGCAGGAAATGA	XP_003443646	ENSDART00000081234	ropn1l	ropporin-1-like protein	GO:0007286,GO:0008603,GO:0007165,GO:0045859	NA	NA	M_beryllina_05_2013_comp101979_c0_seq1
M_beryllina_05_2013_comp101983_c0_seq1	CUST_38926_PI429335447	AATTTCCATTTTGGACATTTTTGGTCCATCCTGTTGGGCATCGTGGCAGGAATACTCACC	XP_003963587	ENSDART00000062706	tmem189	transmembrane protein 189-like	GO:0016021	NA	NA	M_beryllina_05_2013_comp101983_c0_seq1
M_beryllina_05_2013_comp101985_c0_seq1	CUST_5584_PI429335447	GTTTCAGCACCAAGGGAAGACATTGAGAATGCAAATGAATTGGACAGGCTGCAGACTTAA	XP_004075852	NA	NA	cd80 86 molecule short secretory form	0	NA	NA	M_beryllina_05_2013_comp101985_c0_seq1
M_beryllina_05_2013_comp101988_c0_seq2	CUST_3259_PI429335447	ATGTTCCGGGTCGGGGACCTGAGGAAGAGCATGATCATCTCAGCCACCATTCAGCTTCAG	XP_004069827	ENSDART00000128820	kcnj11l	atp-sensitive inward rectifier potassium channel 11-like	GO:0005622,GO:0015272,GO:0034765,GO:0071805,GO:0008076	NA	NA	M_beryllina_05_2013_comp101988_c0_seq2
M_beryllina_05_2013_comp101989_c0_seq1	CUST_4426_PI429335447	ACATCTTTCGCCCTGTTTCTGGTGGTGTGGATAATCTTTTACACAGCTCTACATTTTGAC	XP_003439079	ENSDART00000109304	NA	c20orf24 homolog	0	NA	NA	M_beryllina_05_2013_comp101989_c0_seq1
M_beryllina_05_2013_comp101991_c0_seq1	CUST_32662_PI429335447	CAGCAAATCAGAAGATGAAAACACAGATATGGGCAAAGAGTCAATCGGAGACGCACATGA	XP_004080579	ENSDART00000056303	tsr3	ribosome biogenesis protein tsr3 homolog	GO:0006364	NA	NA	M_beryllina_05_2013_comp101991_c0_seq1
M_beryllina_05_2013_comp101993_c0_seq1	CUST_42268_PI429335447	TCTGGACGCCGGCGGCCATGTTTTCAAAGAGGAGGCCTCAGAGAGCTTCGGCGGAAGCTA	XP_004569286	ENSDART00000011890	ZBTB22 (2 of 2)	zinc finger and btb domain containing 22 transcript variant 1a	GO:0046872,GO:0005622	NA	NA	M_beryllina_05_2013_comp101993_c0_seq1
M_beryllina_05_2013_comp102007_c0_seq2	CUST_8152_PI429335447	AACCCCTCAGAAAACATTTGTGTGCCAGTTGTGTGGCTTGAGCACCCCTTTTACTTACTA	XP_004082950	ENSDART00000137798	CDPF1	cysteine-rich dpf motif domain-containing protein 1-like	GO:0003674,GO:0008150,GO:0005575	NA	NA	M_beryllina_05_2013_comp102007_c0_seq2
M_beryllina_05_2013_comp102016_c0_seq1	CUST_12178_PI429335447	GAAAAACTGGAAGAAAACCACTACAACACCTACCAGCCGCAGAAATACCTGGACAACAAC	XP_003446003	ENSDART00000005842	fgf1a	fibroblast growth factor 1	GO:0030097,GO:0051781,GO:0008083,GO:0045766,GO:0045542,GO:0044548,GO:0005615,GO:0005829,GO:0008201,GO:0008284,GO:0010740,GO:0030154,GO:0060681,GO:0045944,GO:0005104,GO:0008543,GO:0072163,GO:0030335,GO:0005634,GO:0005938	NA	NA	M_beryllina_05_2013_comp102016_c0_seq1
M_beryllina_05_2013_comp102017_c3_seq3	CUST_11548_PI429335447	TTATTAGAAGAGTTGCTGAACAAGTTTAAGAGCAGCATGCAGCTCCAGCTCACCTGCTTC	XP_004571816	ENSDART00000077962	exoc2	exocyst complex component 2	0	NA	NA	M_beryllina_05_2013_comp102017_c3_seq3
M_beryllina_05_2013_comp102018_c0_seq1	CUST_7405_PI429335447	TAAAGGCGAAAGACAACGAATCCGATGTCATTGGGTACATGGTGTTACTGAAACAGGAGG	XP_003450251	ENSDART00000098639	cntn5	contactin-5-like isoform x3	GO:0031225,GO:0007155,GO:0005886	NA	NA	M_beryllina_05_2013_comp102018_c0_seq1
M_beryllina_05_2013_comp102018_c1_seq4	CUST_7408_PI429335447	AATCTACAAGCCCGGAGCCCATTTTCATTAGGATGGCAAACTGTCAAAACAGATCCAGAC	XP_003450251	ENSDART00000098641	cntn5	contactin-5-like isoform x4	GO:0031225,GO:0007155,GO:0005886	NA	NA	M_beryllina_05_2013_comp102018_c1_seq4
M_beryllina_05_2013_comp102026_c0_seq2	CUST_33358_PI429335447	CAGTCAAGAGGGGTGGAGAGATGGCTTATCTTGATCTTTAATACCTTAAACAAAAGGTGA	XP_004552736	ENSDART00000133225	SPP2	secreted phosphoprotein 24	GO:0046849,GO:0005576	NA	NA	M_beryllina_05_2013_comp102026_c0_seq2
M_beryllina_05_2013_comp102031_c0_seq1	CUST_28930_PI429335447	TTTCTCCACTCTGAGAAACATACAAGGTCTTCATGCTCCGCTCAAACTGCAGATGGAGTA	XP_003459532	ENSDART00000045124	pomp	proteasome maturation protein	GO:0000502	NA	NA	M_beryllina_05_2013_comp102031_c0_seq1
M_beryllina_05_2013_comp102034_c0_seq2	CUST_42979_PI429335447	ACGAGTACCAGGGCAGCTTTCAGAGCTGCTTCCATTTCGGAGACTCGTACCGGATGGATC	XP_004555125	NA	NA	zinc finger protein glis1-like isoform x1	0	NA	NA	M_beryllina_05_2013_comp102034_c0_seq2
M_beryllina_05_2013_comp102034_c0_seq3	CUST_42982_PI429335447	ACGAGTACCAGGGCAGCTTTCAGAGCTGCTTCCATTTCGGAGACTCGTACCGGATGGATC	XP_004555127	ENSDART00000029255	glis1b	zinc finger protein glis1-like isoform x3	0	NA	NA	M_beryllina_05_2013_comp102034_c0_seq3
M_beryllina_05_2013_comp102038_c0_seq2	CUST_26068_PI429335447	TGCTACAAACTCAGAGCCCCAAAGCCAAAGAAGATGGACGTTGTTGTTTTTGTTGAGTCC	XP_003447031	NA	NA	PREDICTED: hypothetical protein LOC100702361	0	NA	NA	M_beryllina_05_2013_comp102038_c0_seq2
M_beryllina_05_2013_comp102039_c1_seq1	CUST_34681_PI429335447	CCCAGACTGAGGACCACACCAGACTACATGGAAGTACTGGACCGGTCTTACCAGTTTTAA	XP_004082544	ENSDART00000140844	slitrk3b	slit and ntrk-like protein 3-like	0	NA	NA	M_beryllina_05_2013_comp102039_c1_seq1
M_beryllina_05_2013_comp102041_c1_seq1	CUST_36475_PI429335447	ATACAAGAAGAAAAATCCTTTCCTGCAATGCTGTCCCTGCCTACCGTGCTCCAGAAACAA	XP_003449929	ENSDART00000064657	stx11a	syntaxin-11-like isoform x2	GO:0016020,GO:0005484,GO:0016192,GO:0006886,GO:0005622	NA	NA	M_beryllina_05_2013_comp102041_c1_seq1
M_beryllina_05_2013_comp102043_c0_seq2	CUST_25018_PI429335447	TGTACTTCACCGTGGTCATGGCCACGGGCAAGGAGATCGACTTTCGCTGTCCGCAGGACG	XP_003448247	ENSDART00000055087	phlda3	pleckstrin homology-like domain family a member 3-like	GO:0010314,GO:0005547,GO:0006917,GO:0042771,GO:0005622,GO:0032266,GO:0005546,GO:0051898,GO:0080025,GO:0005886,GO:0043325	NA	NA	M_beryllina_05_2013_comp102043_c0_seq2
M_beryllina_05_2013_comp102044_c0_seq1	CUST_37375_PI429335447	TCTGGAGATCCCAGAGATCAACGCCATGGCAACCAGCCAACGGGACAACAGCCTGTTCTT	XP_003442603	ENSDART00000055338	thoc6	tho complex subunit 6 homolog	GO:0008380,GO:0003723,GO:0051028,GO:0006397	NA	NA	M_beryllina_05_2013_comp102044_c0_seq1
M_beryllina_05_2013_comp102048_c0_seq1	CUST_7855_PI429335447	ACATCATCTTTGACTACGAGAATGACACCAGCTCCGGTTCCGGTTCTGGGGAGGAGGGAG	XP_003457473	ENSDART00000080350	cxcr4a	c-x-c chemokine receptor type 4-like	GO:0004950,GO:0002042,GO:0001570,GO:0000902,GO:0030239,GO:0042221,GO:0005515,GO:0042074,GO:0016020,GO:0007187	NA	NA	M_beryllina_05_2013_comp102048_c0_seq1
M_beryllina_05_2013_comp102049_c0_seq2	CUST_41581_PI429335447	TTGTTCCAGTTCATCGCCAAGAGCACCAAGGAAAGACACAGTCCATATAACTGACAAAGG	XP_004555936	ENSDART00000057469	vstm4a	v-set and transmembrane domain-containing protein 4-like	GO:0003674,GO:0008150,GO:0005575	NA	NA	M_beryllina_05_2013_comp102049_c0_seq2
M_beryllina_05_2013_comp102052_c0_seq1	CUST_17548_PI429335447	AATTTGGCCTCAAGTCCGATTGGATAACTCCACACACGGCCTTTTCCATGACATGTTCAA	XP_003448574	ENSDART00000004483	zgc:162969	la-related protein 6-like	GO:0003723,GO:0006396,GO:0030529,GO:0005634,GO:0000166,GO:0001756,GO:0003676	NA	NA	M_beryllina_05_2013_comp102052_c0_seq1
M_beryllina_05_2013_comp102056_c0_seq1	CUST_18037_PI429335447	TCGACCAGGGAATCAACCTGAGAGGAGAGGGTCTGTGCTTCAAGCTGTTCTACGTGAGGC	ABV66068	ENSDART00000032547	lect2l	leukocyte cell-derived chemotaxin 2 precursor	0	NA	NA	M_beryllina_05_2013_comp102056_c0_seq1
M_beryllina_05_2013_comp102058_c0_seq2	CUST_10882_PI429335447	TTCGCTCATGCCTCAGGTGGTGTTTGTGGATGGGAACGGGCTCTTCCACCACAGAGAGTT	XP_004538839	NA	NA	---NA---	0	NA	NA	M_beryllina_05_2013_comp102058_c0_seq2
M_beryllina_05_2013_comp102060_c0_seq1	CUST_7741_PI429335447	ATCTCACAGGGAGGGAGAGAAGACCAACCGACAAAGAAAGGAAGACGGAAAATGCCCCCC	XP_004545979	ENSDART00000074900	BX323876.2	c-type natriuretic peptide 3 precursor	GO:0005576,GO:0005179,GO:0050880,GO:0007165	NA	NA	M_beryllina_05_2013_comp102060_c0_seq1
M_beryllina_05_2013_comp102063_c0_seq2	CUST_7060_PI429335447	ATCAGCAGCTTCTACTCCTGCGTGGACAGAGCTCAGGCCGCCATGAAGAACAAGTCTGAG	ACQ58781	ENSDART00000100941	chchd1	coiled-coil-helix-coiled-coil-helix domain-containing protein 1	GO:0003674,GO:0008150,GO:0005575	NA	NA	M_beryllina_05_2013_comp102063_c0_seq2
M_beryllina_05_2013_comp102070_c0_seq1	CUST_39235_PI429335447	TTCAATCCTGAGAAAACTTTCTGTAAAGAAGGTGAAGGGATCAAGCTGCCGTACTCCCAA	XP_003457284	NA	NA	tributyltin binding protein type 1	0	NA	NA	M_beryllina_05_2013_comp102070_c0_seq1
M_beryllina_05_2013_comp102076_c0_seq1	CUST_14701_PI429335447	AGTCGTAGCTTTCATCACTTTCCTTTCCATTGCTATCAGCAGAAAGGAGTCACTGACGGA	CBN80911	ENSDART00000029930	slc48a1b	heme transporter hrg1-a-like	GO:0015886,GO:0005765,GO:0015232,GO:0016021,GO:0048821,GO:0010008	NA	NA	M_beryllina_05_2013_comp102076_c0_seq1
M_beryllina_05_2013_comp102078_c0_seq3	CUST_7576_PI429335447	TTCTGTGACGTCTACAACCCCCAAAGCAAGACCTACTGCAAGAGGCTGCAGGTCCTGTGC	XP_003457681	ENSDART00000035602	cxxc1	---NA---	0	NA	NA	M_beryllina_05_2013_comp102078_c0_seq3
M_beryllina_05_2013_comp102079_c0_seq3	CUST_8161_PI429335447	TGTGCAATGTGTGGAAAAAAGGTTTTGGACACCAAGAATTACAAGCAGACATCTGTGTGA	XP_003441809	NA	NA	cysteine-rich pdz-binding protein	GO:0005737	NA	NA	M_beryllina_05_2013_comp102079_c0_seq3
M_beryllina_05_2013_comp102080_c0_seq2	CUST_27067_PI429335447	GAAAACCAAGAGAGGCAGGTCATCTTGGACCTGTTAAAAGAGAAGGTCTTGAAAGGGTGA	XP_004065725	ENSDART00000151710	si:dkey-45d16.4	PREDICTED: uncharacterized protein LOC101170399	0	NA	NA	M_beryllina_05_2013_comp102080_c0_seq2
M_beryllina_05_2013_comp102084_c0_seq1	CUST_11512_PI429335447	ATCAAGTGTGAAGACAAATTCACCAAATCCAAAACTGTGTACAGCATCCTGCGGCACGTG	XP_004550509	ENSDART00000073981	eif2s1b	eukaryotic translation initiation factor subunit 1 alpha	GO:0005850,GO:0003743,GO:0005840,GO:0006446	NA	NA	M_beryllina_05_2013_comp102084_c0_seq1
M_beryllina_05_2013_comp102090_c0_seq1	CUST_30415_PI429335447	TTACGTCCCGTTCCTGATGGTGGGGAGCATCTTCGTGGCCTTCGTCATCGTGGGCTCGCT	XP_004073077	ENSDART00000110191	shisa3	protein shisa-2-like	GO:0003674,GO:0008150,GO:0005575	NA	NA	M_beryllina_05_2013_comp102090_c0_seq1
M_beryllina_05_2013_comp102097_c0_seq1	CUST_3940_PI429335447	GAAGATGAAACATCTACTGCGCAATCGGTGACCGAAGTCTCTAAAATCGAGCCTGCTTAA	AAY26038	ENSDART00000011178	opn1sw2	blue sensitive visual pigment	GO:0004930,GO:0007602,GO:0018298,GO:0007186,GO:0009881,GO:0007601,GO:0016021	NA	NA	M_beryllina_05_2013_comp102097_c0_seq1
M_beryllina_05_2013_comp102098_c0_seq1	CUST_33838_PI429335447	ATGAAGAACACGGAGCGTGTTTATGCGATGAAGATCCTCAATAAGTGGGAGATGCTGAAG	XP_003459655	ENSDART00000049437	cdc42bpb	serine threonine-protein kinase mrck alpha-like	GO:0005083,GO:0006468,GO:0035556,GO:0004674,GO:0046872,GO:0031532,GO:0005543,GO:0005524,GO:0009069	NA	NA	M_beryllina_05_2013_comp102098_c0_seq1
M_beryllina_05_2013_comp102100_c0_seq1	CUST_17647_PI429335447	TTCATCTGCAAGTACCAGCCAGAGACCCTTTTGACAGAGGAGCATGGCCACACTGCTGGG	XP_003457238	ENSDART00000041335	chodl	layilin-like	GO:0007409	NA	NA	M_beryllina_05_2013_comp102100_c0_seq1
M_beryllina_05_2013_comp102105_c0_seq2	CUST_4861_PI429335447	AACGAACCAGTCAGCATACCAGGAAAGCCCTACATTGAGTCGGAGCTTGTTGATTACATT	XP_003977884	ENSDART00000009888	casq1b	calsequestrin-1-like	GO:0005509	NA	NA	M_beryllina_05_2013_comp102105_c0_seq2
M_beryllina_05_2013_comp102106_c0_seq2	CUST_36529_PI429335447	TTATGAAGTCCTTGGTTTTGCAACTATGCAGGGCAGGCTCTCAATGATGGCGTTCATCTT	XP_004545103	ENSDART00000010143	SYS1	sys1 homolog	GO:0000139	NA	NA	M_beryllina_05_2013_comp102106_c0_seq2
M_beryllina_05_2013_comp102110_c0_seq1	CUST_1630_PI429335447	GGAGGAAAGGATTCCTATTATTTCTTCACAGAGGTCAAGAGTATCACCATCAAACACTAA	XP_004083752	ENSDART00000053399	aldh8a1	aldehyde dehydrogenase family 8 member a1-like isoform 1	GO:0009653,GO:0016620,GO:0005737,GO:0055114,GO:0001889	NA	NA	M_beryllina_05_2013_comp102110_c0_seq1
M_beryllina_05_2013_comp102111_c1_seq2	CUST_25837_PI429335447	ATTCCCATACTAATCAGCAACAAGAGTGACACAAAAGAAATAGTTGTTGGTAAGTATTGC	XP_003440657	NA	NA	PREDICTED: hypothetical protein LOC100692055	0	NA	NA	M_beryllina_05_2013_comp102111_c1_seq2
M_beryllina_05_2013_comp102111_c1_seq3	CUST_38638_PI429335447	GCACAAACAAAGAGCGAGAAGTGAAAGAGAAGAGCCTGTGTACGTCAACAACCACCATAA	XP_004554920	NA	NA	transmembrane and immunoglobulin domain-containing protein 2-like	0	NA	NA	M_beryllina_05_2013_comp102111_c1_seq3
M_beryllina_05_2013_comp102134_c0_seq1	CUST_33196_PI429335447	TTTCAGAGTCGGAAGCCAAAATACTGACCACGGAGGGCACGCACCTTCCTCAAAGCGGCA	XP_004569294	ENSDART00000149048	sall3a	sal-like protein 1-like	GO:0035118,GO:0045743	NA	NA	M_beryllina_05_2013_comp102134_c0_seq1
M_beryllina_05_2013_comp102135_c0_seq2	CUST_33229_PI429335447	TCATAGAGGAAGCTTTAAAGCATCCAATGACAGAGGAGGAGAGACGCGAACAAGTCAAAA	XP_003444645	ENSDART00000126979	ubxn1	sapk substrate protein 1	GO:0032435,GO:0031397,GO:0005737,GO:0071796	NA	NA	M_beryllina_05_2013_comp102135_c0_seq2
M_beryllina_05_2013_comp102142_c0_seq2	CUST_16888_PI429335447	AAGATACAAGAATGTTAATGGCATCAAATACCACGCTAAGAACGGCCACCGGACCCAGAT	XP_004541543	ENSDART00000079343	jazf1b	juxtaposed with another zinc finger protein 1-like	GO:0042384,GO:0007368,GO:0003676,GO:0005622,GO:0008270	NA	NA	M_beryllina_05_2013_comp102142_c0_seq2
M_beryllina_05_2013_comp102143_c0_seq1	CUST_8083_PI429335447	AAATACATTGGTGGAAAGCCTTGACAACTCCGATAAGGTGTCCTCAGTGCTGAAAACGGT	CAG25610	ENSDART00000102703	cygb2	cygb1_oryla ame: full=cytoglobin-1	GO:0020037,GO:0005737,GO:0005344,GO:0015671,GO:0005506,GO:0019825	NA	NA	M_beryllina_05_2013_comp102143_c0_seq1
M_beryllina_05_2013_comp102144_c0_seq3	CUST_6769_PI429335447	AGGTCTGGGGAACACCAAATTCCTGTAAAGCTCCCACATATAGCAGAACACAACACTTAA	XP_004570905	ENSDART00000008989	ccdc113	coiled-coil domain-containing protein 113-like	GO:0003674,GO:0008150	NA	NA	M_beryllina_05_2013_comp102144_c0_seq3
M_beryllina_05_2013_comp102146_c0_seq1	CUST_24610_PI429335447	TACTGCTCCGCCATGTACTTGAAGACGATTTGCAAGCTTGAAGGCAAAGTGTACCTGATA	XP_003438766	ENSDART00000039693	pgp	phosphoglycolate phosphatase-like	GO:0016311,GO:0016791	NA	NA	M_beryllina_05_2013_comp102146_c0_seq1
M_beryllina_05_2013_comp102149_c0_seq4	CUST_29755_PI429335447	ATAGAGATGGAGAACAACTCCTACATCCATGCTCTGGATACTGGGCTCTTTACACTTGGT	XP_003449742	ENSDART00000079001	FRG1	protein frg1-like isoform 2	GO:0015030,GO:0016607,GO:0006364	NA	NA	M_beryllina_05_2013_comp102149_c0_seq4
M_beryllina_05_2013_comp102152_c0_seq2	CUST_20878_PI429335447	TGGAGCTGAACAACGACCGGCTGCAGACCCACACCGTCTACAAGAACCTCAGCCCGGAGT	XP_004572854	ENSDART00000086220	mctp1b	---NA---	0	NA	NA	M_beryllina_05_2013_comp102152_c0_seq2
M_beryllina_05_2013_comp102156_c0_seq1	CUST_30583_PI429335447	AGAAAACAACAGCATCCTCCTGGACCTGGCAGTCTACAGACACCTGGACACCTCCCTGAT	XP_004569523	ENSDART00000075347	lrrc6	protein tilb homolog	GO:0003146,GO:0060294,GO:0009953,GO:0001947,GO:0005515,GO:0042384,GO:0005737,GO:0048793,GO:0060027	NA	NA	M_beryllina_05_2013_comp102156_c0_seq1
M_beryllina_05_2013_comp102160_c0_seq1	CUST_13486_PI429335447	CAGGTGATCGACTTCACCAAACCCTTCATGTCCCTGGGCATCTCCATCATGATCAAGAAG	AAL34309	ENSDART00000129703	gria1b	glutamate receptor 1-like isoform 2	GO:0045211,GO:0030054,GO:0005886,GO:0005234,GO:0006811,GO:0004970,GO:0016021,GO:0035235,GO:0030288,GO:0007268	NA	NA	M_beryllina_05_2013_comp102160_c0_seq1
M_beryllina_05_2013_comp102160_c2_seq2	CUST_13513_PI429335447	TGTGTGGACTTGGCCTCAGAGATTGCCAAACATATCGGAATCAAGTACAAGATCTCCATC	XP_004543929	ENSDART00000016916	gria4b	glutamate receptor 4-like isoform x4	GO:0005234,GO:0030054,GO:0030288,GO:0004970,GO:0016021,GO:0030425,GO:0006811,GO:0035235,GO:0045211,GO:0043025,GO:0005886,GO:0007268	NA	NA	M_beryllina_05_2013_comp102160_c2_seq2
M_beryllina_05_2013_comp102168_c0_seq1	CUST_22756_PI429335447	AGTGATGTCACATCCACTACAGCTGTCAAAGGTGAACCGGCCAGCAGTTCTGCGTCCACC	XP_003453360	ENSDART00000138488	nasp	nuclear autoantigenic sperm	GO:0008150,GO:0005575	NA	NA	M_beryllina_05_2013_comp102168_c0_seq1
M_beryllina_05_2013_comp102170_c0_seq1	CUST_12208_PI429335447	ATCTTAGCAGACGGGTACAACACCTACTTCTCGGAGCGACACGGAGCCCTCCTCAGTTTG	XP_003456607	ENSDART00000082018	fgf19	fibroblast growth factor 19-like	GO:0030098,GO:0048665,GO:0007420,GO:0050769,GO:0048709,GO:0005102,GO:0030099,GO:0008284,GO:0060041,GO:0031290,GO:0002088,GO:0007165	NA	NA	M_beryllina_05_2013_comp102170_c0_seq1
M_beryllina_05_2013_comp102172_c0_seq1	CUST_26653_PI429335447	GCCCAAAAAGCTGCAGAGGAGAAAAAGCAATACCATATTCATTTATCATATAATGACTGT	XP_004556125	NA	NA	PREDICTED: uncharacterized protein C6orf118-like isoform X1	0	NA	NA	M_beryllina_05_2013_comp102172_c0_seq1
M_beryllina_05_2013_comp102172_c0_seq3	CUST_26650_PI429335447	CAAGGCTATAAGACGGTGTGTAGTATGTTACATGCAGTGTTTCTGTTTAATTGATTTGTG	XP_003441207	NA	NA	PREDICTED: uncharacterized protein C6orf118-like	0	NA	NA	M_beryllina_05_2013_comp102172_c0_seq3
M_beryllina_05_2013_comp102174_c0_seq2	CUST_2062_PI429335447	AAATCTATGAACTGGTTCTGAACTCAGATCATCCACCAGAAATGCACACGGCCCTTCTGT	XP_004075992	ENSDART00000152329	bmb	and ph domain-containing protein 1-like	GO:0006997	NA	NA	M_beryllina_05_2013_comp102174_c0_seq2
M_beryllina_05_2013_comp102182_c0_seq1	CUST_37642_PI429335447	GAGTGTGGAACATAAAGATTTTGAGAATCATTTTGATGAAAAGTCTCACTTACTGCCTTG	AEK49146	ENSDART00000060142	tlr21	toll-like receptor 21	GO:0007165,GO:0052033	NA	NA	M_beryllina_05_2013_comp102182_c0_seq1
M_beryllina_05_2013_comp102185_c0_seq2	CUST_34819_PI429335447	TCAAGTCGGCCTTCTTTTTCTTCGAAGGAGTTTTCTACAACGACATGCGGTTTCCTGAGT	XP_004549456	ENSDART00000124781	snapc3	snrna-activating protein complex subunit 3-like	GO:0005575	NA	NA	M_beryllina_05_2013_comp102185_c0_seq2
M_beryllina_05_2013_comp102188_c0_seq1	CUST_7279_PI429335447	AGAGTGACAAAGCCAATAATCAAGGTGGAAGACCTCAGGTTAATCAGGAGGGAAACTGGT	XP_004074560	ENSDART00000115273	c9	complement component c9	GO:0045087,GO:0006956,GO:0005579	NA	NA	M_beryllina_05_2013_comp102188_c0_seq1
M_beryllina_05_2013_comp102189_c0_seq1	CUST_1639_PI429335447	GAATACTACTCCCAACTGAAGACTGTCATCGTGGAAATGGGCGACGTAGATAATTACTTC	ABF83193	ENSDART00000100283	aldh9a1a.1	aldh9a1a protein	GO:0005737,GO:0019285,GO:0008802,GO:0055114,GO:0006544,GO:0006563,GO:0006566	NA	NA	M_beryllina_05_2013_comp102189_c0_seq1
M_beryllina_05_2013_comp102190_c0_seq4	CUST_19516_PI429335447	AAGAACCAGGAGCTGAAGCTGCTGATGGACCAGATGAGGAACCTGCTCTGGGACGTGAAC	XP_003447218	ENSDART00000098999	zgc:114119	mediator of rna polymerase ii transcription subunit 30-like	GO:0006351	NA	NA	M_beryllina_05_2013_comp102190_c0_seq4
M_beryllina_05_2013_comp102193_c0_seq1	CUST_9676_PI429335447	AGCTATGAAAGAACTGAAGAGCAGAAAGATCCCCATAATCATCCGCAGGTACCTTCCAGA	XP_004071844	ENSDART00000053201	polr2f	dna-directed rna polymerases and iii subunit rpabc2	GO:0003899,GO:0006351,GO:0030880,GO:0003677,GO:0005730,GO:0006144,GO:0006206	NA	NA	M_beryllina_05_2013_comp102193_c0_seq1
M_beryllina_05_2013_comp102195_c0_seq2	CUST_1537_PI429335447	AGCAGTGCGTGGAAGCTCACAAATACATTAATGCAGACAAACCGCCTCTCTTCGCTCTGA	XP_003963022	ENSDART00000111465	agrn	agrin- partial	0	NA	NA	M_beryllina_05_2013_comp102195_c0_seq2
M_beryllina_05_2013_comp102197_c0_seq1	CUST_29545_PI429335447	ATACTCGTCAGCCGAGCAAATTAATCAGGATCTGAACATCCAGCTGCTGAAAGATGGCTA	XP_004544404	ENSDART00000145096	fam219ab	protein fam219a-like isoform 1	GO:0003674,GO:0008150,GO:0005575	NA	NA	M_beryllina_05_2013_comp102197_c0_seq1
M_beryllina_05_2013_comp102199_c0_seq1	CUST_18262_PI429335447	TGTGGAACAGAGAAGGTCGCTGAGAATGAGATCCAGTCTGTGCTTCCATGCCCAGTTTAA	ACH53598	ENSDART00000148736	pla1a	lipoprotein lipase	GO:0052689	NA	NA	M_beryllina_05_2013_comp102199_c0_seq1
M_beryllina_05_2013_comp102201_c0_seq2	CUST_982_PI429335447	TTCCAGAAGAAACCGTGGAGGACATTAAGGTCAGAACATGTTTTGTCAGTGACCTGCAGA	XP_004542165	ENSDART00000099338	actr10	actin-related protein 10-like	GO:0008150,GO:0005524,GO:0005737,GO:0005856,GO:0000166	NA	NA	M_beryllina_05_2013_comp102201_c0_seq2
M_beryllina_05_2013_comp102204_c0_seq1	CUST_24466_PI429335447	AGTCTGGGGGAAAAAATATCAGACTTATTGTGATGAACAATATTTTACCACGATCCGTAC	XP_003974135	ENSDART00000111931	pip5k1ca	phosphatidylinositol 4-phosphate 5-kinase type-1 gamma-like	GO:0016310,GO:0046488,GO:0016307	NA	NA	M_beryllina_05_2013_comp102204_c0_seq1
M_beryllina_05_2013_comp102207_c0_seq4	CUST_9691_PI429335447	ATTTTGACAAGAGTCAAGGTTTTGGAGGTGGAGCCAGGCGAGAGGCGTATAATGATAGTT	XP_003440442	ENSDART00000029586	dnaja2	dnaj homolog subfamily a member 2-like	GO:0006457,GO:0046872,GO:0031072,GO:0005524,GO:0051082,GO:0009408	NA	NA	M_beryllina_05_2013_comp102207_c0_seq4
M_beryllina_05_2013_comp102208_c0_seq2	CUST_25228_PI429335447	AGATCATTACCAGTCACTGAAAGACATCCAGAACTCTATGGGTGAAGATGCTCTACAGGA	XP_004554661	ENSDART00000101582	pcgf6	polycomb group ring finger protein 6-like	GO:0008270,GO:0021549	NA	NA	M_beryllina_05_2013_comp102208_c0_seq2
M_beryllina_05_2013_comp102211_c0_seq5	CUST_27169_PI429335447	TAAGTGTGGATATGCCTTATCAGAGAAAGCAAGGTGGGATTGGGACTTCCAAAAGTCCTG	XP_004545097	ENSDART00000082507	zgc:113184	PREDICTED: uncharacterized protein LOC101464098	GO:0008150,GO:0008270,GO:0005622	NA	NA	M_beryllina_05_2013_comp102211_c0_seq5
M_beryllina_05_2013_comp102212_c0_seq1	CUST_7666_PI429335447	TGGATGAAGAACCTGTTCTCCTTCATCAGCCAGCATCTGAGTCCTGAGAGCTGTGGCCCC	XP_003978668	ENSDART00000102640	ctc1	cst complex subunit ctc1-like	GO:0005694,GO:0000781,GO:0003677,GO:0005634	NA	NA	M_beryllina_05_2013_comp102212_c0_seq1
M_beryllina_05_2013_comp102213_c0_seq1	CUST_1780_PI429335447	AGAAATTGTGACTCTCAACAGACCCTTCATGGTCTTCATTATGGAGCACTCGACAAAGAG	ACJ05607	ENSDART00000113927	serpina1	alpha-1-antitrypsin homolog	GO:0030162,GO:0004867,GO:0010951	NA	NA	M_beryllina_05_2013_comp102213_c0_seq1
M_beryllina_05_2013_comp102215_c0_seq4	CUST_42514_PI429335447	AGCGATCTGATTTATGGCAGCTTCTGCCAGCAGTTCACAGAGATGCTGAAGAGCCGCCGG	XP_003968897	ENSDART00000140926	zmym4	zinc finger mym-type protein 4-like	GO:0008270	NA	NA	M_beryllina_05_2013_comp102215_c0_seq4
M_beryllina_05_2013_comp102218_c0_seq1	CUST_12745_PI429335447	TCATTAGCTGTGGGAAGTTATCTCGACTGCCCAGGTGTCACAAGAAGTCATCAAAGTCTT	XP_003454404	ENSDART00000121755	CU463790.1	fxyd domain-containing ion transport regulator 5	GO:0016337,GO:0016020,GO:0006811,GO:0005216	NA	NA	M_beryllina_05_2013_comp102218_c0_seq1
M_beryllina_05_2013_comp102219_c0_seq2	CUST_40513_PI429335447	CAGTGGTCCTCTCTGAGAGACAAATACCCCAAATCGATTTTCCTTGGGAGAATAGTCTGA	ACQ58824	ENSDART00000057999	alg14	udp-n-acetylglucosamine transferase subunit alg14 homolog	GO:0016740	NA	NA	M_beryllina_05_2013_comp102219_c0_seq2
M_beryllina_05_2013_comp102221_c0_seq1	CUST_1714_PI429335447	GTCTCCGTCGACAAGTTCCTCCAGAACCTGGCTCTGGCTCTGTCCGAGAGATACCGTTAA	BAA86218	ENSDART00000110848	hbaa1	alpha hemoglobin a	GO:0015671,GO:0005344,GO:0005833,GO:0005506,GO:0020037,GO:0001666,GO:0019825	NA	NA	M_beryllina_05_2013_comp102221_c0_seq1
M_beryllina_05_2013_comp102224_c0_seq4	CUST_766_PI429335447	AGACTCTAACAGCACTAGTGTCCACTGTAAGCGGAAGATCACAGTTTATCGCAATGGTCA	XP_004542435	ENSDART00000127232	abhd8	abhydrolase domain-containing protein 8-like	GO:0003824,GO:0008152	NA	NA	M_beryllina_05_2013_comp102224_c0_seq4
M_beryllina_05_2013_comp102225_c0_seq2	CUST_27709_PI429335447	GCCGAAAGGGTTAAAACAACAGGAAGAAAGCATATTTGAATCCATTTATGAGAACTTTTG	XP_004567958	NA	NA	PREDICTED: uncharacterized protein LOC101482383	0	NA	NA	M_beryllina_05_2013_comp102225_c0_seq2
M_beryllina_05_2013_comp102225_c0_seq4	CUST_26173_PI429335447	TGGGTAAGATGTGTCCCGTTCACTGATGAAGAAACAAGATTGAACAGTTACATAAAGTGT	XP_003447964	NA	NA	PREDICTED: hypothetical protein LOC100708629	0	NA	NA	M_beryllina_05_2013_comp102225_c0_seq4
M_beryllina_05_2013_comp102235_c0_seq1	CUST_1522_PI429335447	ATCGGCTGGAGGTCATCAACAAGCGCTACGTCAAAGTGGTGTTTTCTGCCGGGAAGACGC	XP_003458166	ENSDART00000089834	afg3l2	afg3-like protein 1-like	GO:0004222,GO:0030163,GO:0005524,GO:0016021,GO:0017111,GO:0006508,GO:0008270	NA	NA	M_beryllina_05_2013_comp102235_c0_seq1
M_beryllina_05_2013_comp102238_c0_seq3	CUST_40207_PI429335447	CTAATTAGTGTCATCAACCATTTCGGCTCCACAGTAAATGATGGACACTACGTGAGTGAG	XP_003978925	ENSDART00000082300	usp37	ubiquitin carboxyl-terminal hydrolase 37-like	GO:0009987,GO:0044699,GO:0016787	NA	NA	M_beryllina_05_2013_comp102238_c0_seq3
M_beryllina_05_2013_comp102241_c0_seq3	CUST_24313_PI429335447	ACAGAGAGTCAAACAGCTCAGCAACTCCATAACGAAATGCATGGAGACCAAAAACGGCAT	XP_003458336	ENSDART00000021577	phf21ab	phd finger protein 21a	GO:0060324,GO:0003677,GO:0008270	NA	NA	M_beryllina_05_2013_comp102241_c0_seq3
M_beryllina_05_2013_comp102244_c0_seq2	CUST_15397_PI429335447	ATGAACTCCTACTTAGATTATCCTGTGTGCAACCGGGGAGCGAATCTTTTCAGTGCCAAA	ABR68660	ENSDART00000110682	hoxb1a	homeobox protein hox-b1b-like	GO:0003677,GO:0006351,GO:0007275	NA	NA	M_beryllina_05_2013_comp102244_c0_seq2
M_beryllina_05_2013_comp102247_c0_seq1	CUST_29554_PI429335447	TTTTGCGCTCATAGGTACAAGGAGCATAAGACTGAATGGGAGTTGGTTCCCACTGATAGA	XP_003448903	ENSDART00000031899	fam221a	protein fam221a-like	GO:0005575	NA	NA	M_beryllina_05_2013_comp102247_c0_seq1
M_beryllina_05_2013_comp102256_c1_seq1	CUST_42235_PI429335447	GGGGGAGTGGCAGCACGACTGCGTCCAGGAGGTGCTGCAGGACATCCGGCAGCGGCTGAC	XP_004573942	ENSDART00000109836	acd	zgc:193816 protein	GO:0044699,GO:0005488	NA	NA	M_beryllina_05_2013_comp102256_c1_seq1
M_beryllina_05_2013_comp102257_c0_seq1	CUST_25990_PI429335447	AGGTGGACGCCTACAAGAGGGAGTGCGTCCTGAGCATCGCTCAGTTCCTGCAGCAGAACC	XP_003455533	ENSDART00000144938	si:ch211-191j22.3	PREDICTED: hypothetical protein LOC100698890	0	NA	NA	M_beryllina_05_2013_comp102257_c0_seq1
M_beryllina_05_2013_comp102262_c0_seq1	CUST_28444_PI429335447	ATAAACAGAGTTTTGCTGAGTGAGCTCTTTACACCAGCGATGGGCATCGAAGCAGAGATT	XP_004555783	ENSDART00000142927	ptrh1	probable peptidyl-trna hydrolase-like	GO:0004045	NA	NA	M_beryllina_05_2013_comp102262_c0_seq1
M_beryllina_05_2013_comp102270_c0_seq1	CUST_25021_PI429335447	TAGATTTAGAGCAGTGGTACCAGGAGCTGATGGTTGGGTCCAGCCAGCTTTATGCCCCCC	XP_004537989	ENSDART00000086734	phldb1a	pleckstrin homology-like domain family b member 1-like	0	NA	NA	M_beryllina_05_2013_comp102270_c0_seq1
M_beryllina_05_2013_comp102278_c1_seq1	CUST_34456_PI429335447	ACTTCAGAAAGGTTCTGACCAACCTGGGCAACGCCTACAACCCCGAGACAGGCGTGTTCA	AEA30131	ENSDART00000128855	CT027762.3	si:rp71- protein	GO:0003674,GO:0008150,GO:0005575	NA	NA	M_beryllina_05_2013_comp102278_c1_seq1
M_beryllina_05_2013_comp102279_c0_seq2	CUST_33001_PI429335447	TCAGACGAGCTGGGCTTCGAGTTCAGCGCGTCCAACATCTGGGCGCCTTTTGTGAACGGC	XP_004542552	ENSDART00000125492	MEX3D	rna-binding protein mex3d-like	GO:0008270,GO:0003723	NA	NA	M_beryllina_05_2013_comp102279_c0_seq2
M_beryllina_05_2013_comp102280_c0_seq2	CUST_30193_PI429335447	CTCATCGACCCGGAGAGCCGCGAGCTGCTGGAGCTGTTCGGGCTCCGGGCTGCTGACTGA	XP_004065597	ENSDART00000134231	ppp1r27	protein phosphatase 1 regulatory subunit 27-like	GO:0003674,GO:0008150,GO:0005575	NA	NA	M_beryllina_05_2013_comp102280_c0_seq2
M_beryllina_05_2013_comp102281_c0_seq3	CUST_14329_PI429335447	GTTTGGTCTTCATGGACACACAACTGGAAAGGGAACGGTTTCACTGAAGGAGCTGAATTT	XP_003451998	ENSDART00000143093	sar1ab	gtp-binding protein sar1b	GO:0005525,GO:0005794,GO:0016192,GO:0006886,GO:0005783	NA	NA	M_beryllina_05_2013_comp102281_c0_seq3
M_beryllina_05_2013_comp102282_c0_seq1	CUST_19315_PI429335447	ACGTGCACAAACATATGTTCCAGGAGAGGCATCGTGCTGATCTGCGCCGTCCTGACCAAC	XP_003976621	ENSDART00000054652	MARVELD3	marvel domain-containing protein 3-like	GO:0016020	NA	NA	M_beryllina_05_2013_comp102282_c0_seq1
M_beryllina_05_2013_comp102284_c0_seq1	CUST_30100_PI429335447	CACTTCCTGCTGGTTCAGACCGGGGCCGGGAGGCTGAGGTGCGGCGGGGGGGGCGAGGCG	XP_004576570	ENSDART00000127169	CABZ01048675.1	protein nlrc3-like	GO:0005524,GO:0000166	NA	NA	M_beryllina_05_2013_comp102284_c0_seq1
M_beryllina_05_2013_comp102287_c0_seq1	CUST_33304_PI429335447	ACAGGGCGAAAACCGGCGGCAGGACGGCAAACACAGTGTCTTACAGTGCCTCGGAGCTGA	XP_004080683	ENSDART00000087208	sost	sclerostin domain-containing protein 1 precursor	GO:0005615	NA	NA	M_beryllina_05_2013_comp102287_c0_seq1
M_beryllina_05_2013_comp102290_c0_seq3	CUST_26182_PI429335447	GGTAACCTGATGTTTGATCGCTCAGTGGCTGATGATAACACCAGGCTTTATATGGAGATG	XP_003444634	NA	NA	PREDICTED: hypothetical protein LOC100708884	0	NA	NA	M_beryllina_05_2013_comp102290_c0_seq3
M_beryllina_05_2013_comp102292_c0_seq4	CUST_10960_PI429335447	CCGCCCCTTCTGTTCGACCCGGAGGAGGAGGAGGGCTGCAAAAGGGAGGACGCCGCCTGA	XP_004570791	ENSDART00000124834	ZNF337 (23 of 39)	endothelial zinc finger protein induced by tumor necrosis factor alpha-like isoform x1	GO:0003676,GO:0008270	NA	NA	M_beryllina_05_2013_comp102292_c0_seq4
M_beryllina_05_2013_comp102293_c0_seq1	CUST_12616_PI429335447	TATTTACTGCAGCCCGTGCTACGATAAGAAGTTTGCCAAACACTGCGTCAGCTGCAAAAA	XP_003446997	ENSDART00000134322	fhl1b	four and a half lim domains protein 1-like	GO:0008270	NA	NA	M_beryllina_05_2013_comp102293_c0_seq1
M_beryllina_05_2013_comp102293_c0_seq2	CUST_12613_PI429335447	TATTTACTGCAGCCCGTGCTACGATAAGAAGTTTGCCAAACACTGCGTCAGCTGCAAAAA	XP_003446997	ENSDART00000134322	fhl1b	four and a half lim domains protein 1	GO:0008270	NA	NA	M_beryllina_05_2013_comp102293_c0_seq2
M_beryllina_05_2013_comp102294_c0_seq1	CUST_6694_PI429335447	TGTGCTGCGTTACCTTCCAGAACGAGTCTTAGCAATCCAAGAGTCAAAGGCAAAGATGAT	XP_004562862	ENSDART00000044331	copb2	coatomer subunit beta -like	GO:0030117,GO:0016192,GO:0006886,GO:0030903,GO:0005198	NA	NA	M_beryllina_05_2013_comp102294_c0_seq1
M_beryllina_05_2013_comp102294_c3_seq1	CUST_6697_PI429335447	TTGGATGATCTAGATCTGGACAGTTTTGATCTTGAGGGTATAGACACCGCAGACGACAAC	XP_004562860	ENSDART00000027657	mrps22	coatomer subunit beta -like isoform x1	GO:0030117,GO:0016192,GO:0005198,GO:0006886	NA	NA	M_beryllina_05_2013_comp102294_c3_seq1
M_beryllina_05_2013_comp102296_c0_seq1	CUST_24280_PI429335447	AAAGGTCGCGAGCTGGAAGAGTTCCGGCAGCGAGACGAGTATCTGGACTTCGAGAAAACG	CAG03015	ENSDART00000112900	PSD (1 of 2)	ph and sec7 domain-containing protein 2-like	GO:0032012,GO:0005543,GO:0005086	NA	NA	M_beryllina_05_2013_comp102296_c0_seq1
M_beryllina_05_2013_comp102300_c0_seq9	CUST_18388_PI429335447	TTTATAATGGGGAGCTTTGATGTGCCAGGACTGCTATATGACACATCCACAACTGGGTAA	XP_004572840	ENSDART00000077980	pipox	loc558601 protein	GO:0008115,GO:0046653,GO:0055114,GO:0006544,GO:0006563,GO:0006566	NA	NA	M_beryllina_05_2013_comp102300_c0_seq9
M_beryllina_05_2013_comp102308_c0_seq4	CUST_28009_PI429335447	AACCACTGACAGCTCCATCTGTGGAATGTGATGTTACAATCTGTGGGACTAGTTCATCCA	XP_004079280	ENSDART00000057439	parla	presenilins-associated rhomboid-like mitochondrial-like	GO:0004252,GO:0005743,GO:0016021,GO:0006508	NA	NA	M_beryllina_05_2013_comp102308_c0_seq4
M_beryllina_05_2013_comp102309_c0_seq1	CUST_12697_PI429335447	TCCTGTCTGGTGGTCAGTCTGAAGAGGAGGCCAGCGTGAACCTCAATGCCATCAACACCT	XP_004550040	ENSDART00000026766	aldocb	fructose-bisphosphate aldolase c	GO:0006096,GO:0030388,GO:0004332,GO:0006000,GO:0006013,GO:0006020,GO:0006094,GO:0006098,GO:0015976	NA	NA	M_beryllina_05_2013_comp102309_c0_seq1
M_beryllina_05_2013_comp102310_c0_seq1	CUST_30073_PI429335447	ATTGGCTACTGGAGCGTGGAGTACGGGGGCCTGAACCAGGTCTTCCATATATGGCAGTAC	XP_004086535	ENSDART00000125058	nipsnap3	protein nap homolog 3a-like	GO:0003674,GO:0008150,GO:0005575,GO:0005739	NA	NA	M_beryllina_05_2013_comp102310_c0_seq1
M_beryllina_05_2013_comp102311_c0_seq2	CUST_38884_PI429335447	TTCTGCACCATCTCCCTGTGCACGTATGCTGCCAGCGTGACCTACGACCTCTCCCGGAAG	XP_003459826	ENSDART00000008594	tmem178	transmembrane protein 178	GO:0016021	NA	NA	M_beryllina_05_2013_comp102311_c0_seq2
M_beryllina_05_2013_comp102313_c0_seq1	CUST_31792_PI429335447	ATGTCATGCTGGATATGGCTGAGTGTGAAGGAGTAGTGGACATCTACAACTGCGTTAAGA	CAF91392	ENSDART00000137189	ptprua	receptor-type tyrosine-protein phosphatase u-like	GO:0030054,GO:0001757,GO:0006470,GO:0016021,GO:0007155,GO:0030154,GO:0005001,GO:0005886,GO:0007185,GO:0006570	NA	NA	M_beryllina_05_2013_comp102313_c0_seq1
M_beryllina_05_2013_comp102323_c0_seq5	CUST_29944_PI429335447	CTAAGATACAGTGAGAGCATCAAGATCCTGAAGGAAATGAAGGACCTTTATGATCATTAA	XP_003454459	ENSDART00000076066	lin37	protein lin-37 homolog	GO:0003674,GO:0008150,GO:0005575	NA	NA	M_beryllina_05_2013_comp102323_c0_seq5
M_beryllina_05_2013_comp102329_c0_seq1	CUST_31417_PI429335447	GGCCCAGTCGGAGCCCGCCGGCTCCCTATTGGCCGCCCTGAGCCCGTCTGCCCAGTCGAA	XP_004538844	NA	NA	ras gtpase-activating	0	NA	NA	M_beryllina_05_2013_comp102329_c0_seq1
M_beryllina_05_2013_comp102332_c0_seq3	CUST_24214_PI429335447	TTTCACCCTCTTCATGGACAGAATCAAGAAGCACGGTTTTCTGGGTTTGTACAAAGGCCT	XP_004071723	ENSDART00000128260	CABZ01087514.1	peroxisomal membrane protein pmp34-like	GO:0044765,GO:0044763,GO:0016021	NA	NA	M_beryllina_05_2013_comp102332_c0_seq3
M_beryllina_05_2013_comp102334_c1_seq1	CUST_11188_PI429335447	TCCAAAGCGTTCACCGTCATCCCCCCGAACCCCAAGAAGAGGAGAGAGATCCAGAGAAAG	XP_004572972	ENSDART00000112317	zgc:194621	---NA---	0	NA	NA	M_beryllina_05_2013_comp102334_c1_seq1
M_beryllina_05_2013_comp102336_c0_seq9	CUST_25978_PI429335447	TTTTTAAAGATGAACCTGGCTCTGGTCCACGACCGGCTGCAGGTCAAGTCCGTGTGGGAG	XP_003455532	NA	NA	PREDICTED: hypothetical protein LOC100698619	0	NA	NA	M_beryllina_05_2013_comp102336_c0_seq9
M_beryllina_05_2013_comp102342_c0_seq2	CUST_37522_PI429335447	TAACCTGTCTCTGCTGTCCAGCATCCAGGTATGTCACCCTGTTCAGCCCACAGACGCTGA	XP_003457524	NA	NA	tight junction-associated protein 1-like	0	NA	NA	M_beryllina_05_2013_comp102342_c0_seq2
M_beryllina_05_2013_comp102344_c0_seq1	CUST_35773_PI429335447	TTTCCCTGGAGGAGGACCACATCGCCCAGATCTCAGAGCTGCTGGGGAAAATCCCTCCCG	XP_004070320	ENSDART00000127029	si:ch211-220i18.4	srsf protein kinase 3-like	GO:0016301	NA	NA	M_beryllina_05_2013_comp102344_c0_seq1
M_beryllina_05_2013_comp102345_c0_seq1	CUST_4429_PI429335447	AAACAGATGATGCTGCATTACTACAGAAGACAGGAGGAGCTCAAGAAACTGGAGGATGCA	XP_003446854	ENSDART00000130093	C10H21orf59	c21orf59 homolog ( sapiens) like	0	NA	NA	M_beryllina_05_2013_comp102345_c0_seq1
M_beryllina_05_2013_comp102348_c0_seq2	CUST_26458_PI429335447	ACTCTGACGTGTGAGTCCAGAAACAGAGATCCCTCTTCTGTGTGTCCCCCCAGACCAGAG	XP_004065815	NA	NA	PREDICTED: tensin-4-like	0	NA	NA	M_beryllina_05_2013_comp102348_c0_seq2
M_beryllina_05_2013_comp102353_c0_seq1	CUST_6733_PI429335447	ATCAAAAAGAAGTTTACAGGTATAAAACACGAGTGGCAGGTGAACGGGCTGGACGACATC	AAH65947	ENSDART00000008355	cfl2	cofilin-2	GO:0030042,GO:0003779,GO:0015629	NA	NA	M_beryllina_05_2013_comp102353_c0_seq1
M_beryllina_05_2013_comp102354_c0_seq5	CUST_32527_PI429335447	CCAAAACATCCAAAACGTCCAAAGCCTGATGGATCACAGTCTTCTAAAACTGGTGCAGCT	XP_004557240	ENSDART00000063533	aqp12	zgc:92747 partial	GO:0042221	NA	NA	M_beryllina_05_2013_comp102354_c0_seq5
M_beryllina_05_2013_comp102357_c0_seq1	CUST_29932_PI429335447	TACCTTGATATTGTGTACATCTTCTCCTTCTTCCTCCAAATCTTTGGAACCAAACGAGAA	XP_004558849	ENSDART00000057622	FAIM2	protein lifeguard 2-like	GO:0016021	NA	NA	M_beryllina_05_2013_comp102357_c0_seq1
M_beryllina_05_2013_comp102361_c0_seq2	CUST_8398_PI429335447	AGAAAAACCCGTCAACTTGACCTGCTGGTCCCACAACACCCGGGACCTGAGCTGCCGGTG	XP_004082265	ENSDART00000112243	crlf1a	cytokine receptor-like factor 1-like	GO:0008150,GO:0005575	NA	NA	M_beryllina_05_2013_comp102361_c0_seq2
M_beryllina_05_2013_comp102365_c0_seq2	CUST_35845_PI429335447	AGCTGGAAATGAAAAAGAGAGACCAGGAAGCGTTCTTCAGGATGAGTGAGATTTCCGAGT	XP_003970993	ENSDART00000114050	stk10	ste20-like serine threonine-protein kinase-like	GO:0005886,GO:0007049,GO:0006468,GO:0005524,GO:0004674,GO:0009069	NA	NA	M_beryllina_05_2013_comp102365_c0_seq2
M_beryllina_05_2013_comp102366_c0_seq1	CUST_18319_PI429335447	AGTTTCAGAGGATGCAAGCTCCAGATCTGTACCTCTTCTCTACGGATTAGTGTCTCACTT	XP_004538985	ENSDART00000151294	fopnl	lish domain-containing protein fopnl-like	GO:0005815,GO:0034453	NA	NA	M_beryllina_05_2013_comp102366_c0_seq1
M_beryllina_05_2013_comp102367_c0_seq1	CUST_40816_PI429335447	TGATGAAAAAGAGAAACAAGAGAAGGAGGTGGACATTTACGCCGGCCTCTCTGATGAGAA	XP_003978698	ENSDART00000018972	C7H16orf87	upf0547 protein c16orf87 homolog	GO:0003674,GO:0008150,GO:0005575	NA	NA	M_beryllina_05_2013_comp102367_c0_seq1
M_beryllina_05_2013_comp102369_c0_seq4	CUST_16114_PI429335447	TAAAAGAGATTACGCGAGGTTGTTTGGCATCAAGTGCGCAAAGTGTAACATGGGCTTCTG	XP_003440468	ENSDART00000012862	isl2a	insulin gene enhancer protein isl-2a-like	GO:0048675,GO:0008270,GO:0048665,GO:0006355,GO:0043565,GO:0003700,GO:0005667,GO:0045449	NA	NA	M_beryllina_05_2013_comp102369_c0_seq4
M_beryllina_05_2013_comp102369_c0_seq5	CUST_16111_PI429335447	ACGGCATTAAATGCGCTAAATGCAATATCGGCTTCAGCAAGAACGACTTCGTGATGAGAG	BAD13508	ENSDART00000010896	isl1	insulin gene enhancer protein isl-1	GO:0048675,GO:0008270,GO:0048665,GO:0055011,GO:0031017,GO:0048936,GO:0006355,GO:0055012,GO:0043565,GO:0021522,GO:0003700,GO:0005667,GO:0045449	NA	NA	M_beryllina_05_2013_comp102369_c0_seq5
M_beryllina_05_2013_comp102370_c0_seq5	CUST_12619_PI429335447	CCTGTAAGAAGGTAGGATTACAACTGGGTGTTTTATATTTACTGGTCAAGGCATTAAATG	AEX15487	ENSDART00000010496	FHL5	four and a half lim domains protein 2-like	GO:0008270	NA	NA	M_beryllina_05_2013_comp102370_c0_seq5
M_beryllina_05_2013_comp102372_c0_seq1	CUST_9793_PI429335447	TACACCATTGGAGAGGTACCTATTTCATTTGTGGATCGAGTTTATGGAGAATCCAAGCTG	XP_004565535	ENSDART00000079591	dpm1	dolichol-phosphate mannosyltransferase-like	GO:0035269,GO:0006506,GO:0004582,GO:0004169,GO:0005789,GO:0000136	NA	NA	M_beryllina_05_2013_comp102372_c0_seq1
M_beryllina_05_2013_comp102377_c1_seq1	CUST_7174_PI429335447	AACATAAAAAAGAACTGGAGTGCCTCTTAGCAAGCATCGGGAGGTGTCCGGCCAAAATTA	ACQ59011	ENSDART00000066764	commd3	comm domain-containing protein 3	GO:0008270	NA	NA	M_beryllina_05_2013_comp102377_c1_seq1
M_beryllina_05_2013_comp102379_c0_seq1	CUST_3067_PI429335447	TTGAAGACCTCAATGACACCTTCCCTGAAACCAAGTTGGACAAGGTCAAGTACCCTTACT	XP_004539210	ENSDART00000030260	atp5h	atp synthase subunit mitochondrial	GO:0015078,GO:0000276,GO:0015986,GO:0016787	NA	NA	M_beryllina_05_2013_comp102379_c0_seq1
M_beryllina_05_2013_comp102381_c0_seq2	CUST_3955_PI429335447	TGAACTCAACCAACCACGCCATTGTTCAGACACTGGTGAACTCTGTGAACAACAACATTC	BAC02605	ENSDART00000075150	bmp4	bmp4	GO:0060803,GO:0035469,GO:0008083,GO:0048793,GO:0040007,GO:0042664,GO:0035844,GO:0048264,GO:0035162,GO:0005576,GO:0001947,GO:0008284,GO:0060034,GO:0035125,GO:0071910,GO:0003303,GO:0003342	NA	NA	M_beryllina_05_2013_comp102381_c0_seq2
M_beryllina_05_2013_comp102383_c0_seq2	CUST_25660_PI429335447	GAGACAGAGGAAGAAGATGAAGAGAAGATATGCCTTCTACTTCATCAACAGAAAGACTGA	XP_003977252	NA	NA	PREDICTED: dysbindin-like	GO:0005737	NA	NA	M_beryllina_05_2013_comp102383_c0_seq2
M_beryllina_05_2013_comp102383_c0_seq4	CUST_10162_PI429335447	TCTGATGGACATATCAGATCAGGAAGCCCTTGACGTTTTCCTTAACTCAGGAGCAGATGA	XP_004070605	ENSDART00000112156	DBNDD2	dysbindin-like	GO:0005737	NA	NA	M_beryllina_05_2013_comp102383_c0_seq4
M_beryllina_05_2013_comp102385_c0_seq1	CUST_20833_PI429335447	TTTAAATAACCCCGCTCCTAAAAATATCCCGCCTCTAAACGAAGCTATCAGAGATTTCAA	XP_004573365	NA	NA	mucin-5ac-like isoform x1	0	NA	NA	M_beryllina_05_2013_comp102385_c0_seq1
M_beryllina_05_2013_comp102386_c0_seq3	CUST_28336_PI429335447	GGAGACCTTCTGCATGTCCTCCATGAAGTGTTACCGTAGCAACGCCTACACCATCACCGC	XP_004564969	ENSDART00000060283	gpr19	probable g-protein coupled receptor 19-like	GO:0007186,GO:0004930	NA	NA	M_beryllina_05_2013_comp102386_c0_seq3
M_beryllina_05_2013_comp102388_c2_seq1	CUST_22873_PI429335447	AGATCTCGGATCTGACCAAAGACATCCAGAAGACGGCGGGCCAGATCAGGAACTGCGACT	XP_003444208	ENSDART00000041590	tekt1	nuclear pore complex protein nup153-like	GO:0000226,GO:0005874,GO:0003674	NA	NA	M_beryllina_05_2013_comp102388_c2_seq1
M_beryllina_05_2013_comp102389_c0_seq2	CUST_11392_PI429335447	ACAACTACAAGAAATTTGGAGCCACGCTGGAAATAGTAACAGACAAGAGCCAGGAAGGGT	XP_003444613	ENSDART00000064558	etf1	eukaryotic peptide chain release factor subunit 1-like	GO:0016149,GO:0005840,GO:0006444,GO:0006449,GO:0018444	NA	NA	M_beryllina_05_2013_comp102389_c0_seq2
M_beryllina_05_2013_comp102392_c0_seq2	CUST_3463_PI429335447	AATGCCGAGAAGAACATCAAGATTCTGGATCACCAAAAGCTCAACAACGGAAGCCAATAA	XP_003441178	ENSDART00000049684	bag2	bag family molecular chaperone regulator 2	GO:0051087	NA	NA	M_beryllina_05_2013_comp102392_c0_seq2
M_beryllina_05_2013_comp102393_c0_seq3	CUST_1183_PI429335447	TGAAGGTGAACCTGTGCAGCCACTGGTACTACAGCAAGGCCTGCTGCCACTCCTGCAGGG	XP_003444560	ENSDART00000114199	si:ch211-267e7.3	adamts-like protein 2-like	GO:0004222,GO:0005578,GO:0008270	NA	NA	M_beryllina_05_2013_comp102393_c0_seq3
M_beryllina_05_2013_comp102397_c0_seq4	CUST_24430_PI429335447	ACAATGCCAATGCATGCGCTGTTCAGTATGCTGGAACTGGAGCCTTAAAAACAGACTTCA	XP_004573707	ENSDART00000089540	SACM1L (1 of 2)	phosphatidylinositide phosphatase sac1-b-like	GO:0016791,GO:0016021,GO:0005789	NA	NA	M_beryllina_05_2013_comp102397_c0_seq4
M_beryllina_05_2013_comp102398_c0_seq2	CUST_11467_PI429335447	CAATGACCTTGATCGCTACTGGATGGAAACGCTTTTGTGTTTAGTCGGAGAATCGTTTGA	XP_003451978	ENSDART00000036718	eif4e1c	eukaryotic translation initiation factor 4e	GO:0003743,GO:0005840,GO:0006446	NA	NA	M_beryllina_05_2013_comp102398_c0_seq2
M_beryllina_05_2013_comp102399_c0_seq2	CUST_29410_PI429335447	AAGGGGTTTGAAAACATCGATGAAGCTCTCATTTGGCTCAGAAGAGAGCTGACAGACATG	XP_003455672	ENSDART00000084420	fam167ab	protein fam167a-like	GO:0003674,GO:0008150,GO:0005575	NA	NA	M_beryllina_05_2013_comp102399_c0_seq2
M_beryllina_05_2013_comp102403_c0_seq1	CUST_25912_PI429335447	GTCCCACTTCCTGCCACAGAGCTGGGTGGAACTGCCTTAGTTACAACTAAAACTGTGTAG	XP_003443164	NA	NA	PREDICTED: hypothetical protein LOC100695643	0	NA	NA	M_beryllina_05_2013_comp102403_c0_seq1
M_beryllina_05_2013_comp102405_c0_seq1	CUST_23338_PI429335447	CAAAATCTCAACATTAGTTCTAGCCAGGAACTACATTCTCCTGCTGGGTTCCTCTCTGCA	XP_003454931	ENSDART00000060011	olig1	oligodendrocyte transcription factor 2-like	GO:0001709,GO:0021548,GO:0021522,GO:0003700,GO:0048857,GO:0014003,GO:0005667,GO:0045449	NA	NA	M_beryllina_05_2013_comp102405_c0_seq1
M_beryllina_05_2013_comp102409_c0_seq1	CUST_4180_PI429335447	GAACCAATGGAGACCTCGTGCTCAGGTCCCGATGCGATTCCAGCCGTTGCTGTGAAATAA	XP_003437713	ENSDART00000143300	brd7	bromodomain-containing protein 7-like	GO:0006355,GO:0006351,GO:0016568,GO:0070577	NA	NA	M_beryllina_05_2013_comp102409_c0_seq1
M_beryllina_05_2013_comp102410_c0_seq3	CUST_40501_PI429335447	ATCTTCACCTGTAGGTTCATCTTCTGCGGGAGATTCAGGAGAAAGATAAAAGCAGAATGA	XP_004079696	ENSDART00000041615	ugt5g1	udp-glucuronosyltransferase 2b15-like	GO:0016758,GO:0008152	NA	NA	M_beryllina_05_2013_comp102410_c0_seq3
M_beryllina_05_2013_comp102416_c0_seq2	CUST_1282_PI429335447	ACTTGTATTACAAAGCAACTGAGCCAGTCATCGCCTTCTATGAAGGCCGTGGTATTGTGA	XP_003965209	ENSDART00000013404	ak1	adenylate kinase	GO:0004017,GO:0046034,GO:0005524,GO:0016310,GO:0005737,GO:0006144	NA	NA	M_beryllina_05_2013_comp102416_c0_seq2
M_beryllina_05_2013_comp102417_c0_seq1	CUST_35239_PI429335447	TACTACGCTCTAAATAAGTTTCATCCGGCCTTAGTTAGCACCGTACAGCACCTCGAAATC	XP_004546824	ENSDART00000066839	slc35g2b	solute carrier family 35 member g2-like	GO:0016020	NA	NA	M_beryllina_05_2013_comp102417_c0_seq1
M_beryllina_05_2013_comp102418_c0_seq1	CUST_29098_PI429335447	ATAATGGAGCTGAGCCCTCAGCAGCAGAGGAAGCTTTATGATGATCTAATGGTCATCATG	ADO29379	ENSDART00000081811	C18H19orf12 (2 of 4)	protein c19orf12 homolog	GO:0016021,GO:0031966	NA	NA	M_beryllina_05_2013_comp102418_c0_seq1
M_beryllina_05_2013_comp102424_c0_seq1	CUST_27781_PI429335447	CTGCAAGACAAAAAACTCCTAAAGCAAAGACAAGTGAAATTAGAGGACAAGAGAGCCGGA	XP_004542562	ENSDART00000147966	si:dkeyp-68b7.10	PREDICTED: uncharacterized protein LOC101485590	0	NA	NA	M_beryllina_05_2013_comp102424_c0_seq1
M_beryllina_05_2013_comp102431_c1_seq2	CUST_39115_PI429335447	TCTCCTTCTCTGGAGCCGTTACAAGTTCCCCCATAAAACGGAGGCTGCGGAGCAACTGCT	XP_003452839	ENSDART00000110844	TMEM71	transmembrane protein 71	GO:0016021	NA	NA	M_beryllina_05_2013_comp102431_c1_seq2
M_beryllina_05_2013_comp102433_c0_seq1	CUST_25192_PI429335447	AATAATTCTTCTTATGGTGATGGCAAGAAGTTTATCGGCTCTGCCTTTCCTTCATCTCCC	BAA88246	ENSDART00000114115	ENDOU	poly -specific endoribonuclease-like	GO:0005044,GO:0046872,GO:0004521,GO:0090305,GO:0030247,GO:0003723,GO:0005576,GO:0006955,GO:0007165,GO:0051252	NA	NA	M_beryllina_05_2013_comp102433_c0_seq1
M_beryllina_05_2013_comp102434_c0_seq2	CUST_30478_PI429335447	TCAGAGGACACATTCGCACACACACAGGTGAACGACCCTTTGCCTGTCAGCACTGCAACC	CAB54536	ENSDART00000067652	snai1b	protein snail homolog sna-like	GO:0008078,GO:0001837,GO:0008270,GO:0003676,GO:0051059,GO:0022408,GO:0005667	NA	NA	M_beryllina_05_2013_comp102434_c0_seq2
M_beryllina_05_2013_comp102438_c0_seq1	CUST_36733_PI429335447	AACGAGGAGATCACAGCTCTGAAGATCAAATACAACCCGTTTGCTAAAGCATTCCTGGAC	XP_003457827	ENSDART00000150167	tbx19	t-box transcription factor tbx19-like	GO:0036342,GO:0005515,GO:0001756,GO:0060028,GO:0010159,GO:0001947,GO:0044212,GO:0060034,GO:0003140,GO:0003700,GO:2000223,GO:0005667,GO:0045449	NA	NA	M_beryllina_05_2013_comp102438_c0_seq1
M_beryllina_05_2013_comp102440_c0_seq2	CUST_31441_PI429335447	ACTGAAGATGAGATTTATGAACTTTCATACACCAAGGAGCCCAGGAACCCCAAGATCCAG	XP_004075525	ENSDART00000088504	rasgrp4	ras guanyl-releasing protein 1-like	GO:0005085,GO:0005622,GO:0051056,GO:0005509,GO:0043087	NA	NA	M_beryllina_05_2013_comp102440_c0_seq2
M_beryllina_05_2013_comp102441_c0_seq2	CUST_20884_PI429335447	AAACATGGTGCAAGACAAAGACCACATCATGGAACATTTAGACGGCGTGATAGACAAGCC	XP_004554632	ENSDART00000058107	mcfd2	multiple coagulation factor deficiency protein 2-like	GO:0005509	NA	NA	M_beryllina_05_2013_comp102441_c0_seq2
M_beryllina_05_2013_comp102444_c0_seq2	CUST_16540_PI429335447	AACACCAAAATCAGTCCTCCGGGGCTGAAGCTGAGCGTCAGCAAACAGGGGATCGTTGTC	XP_004085067	ENSDART00000057619	crfb9	interleukin-22 receptor subunit alpha-2-like	0	NA	NA	M_beryllina_05_2013_comp102444_c0_seq2
M_beryllina_05_2013_comp102448_c0_seq3	CUST_37342_PI429335447	GGCGGGGGGGAGCGGGTGGGGGGGGCGGTGCTGCTGGAGGCGGGGGGGGCGCCCTGCCGG	XP_004572209	NA	NA	thioredoxin-interacting isoform x1	0	NA	NA	M_beryllina_05_2013_comp102448_c0_seq3
M_beryllina_05_2013_comp102449_c0_seq1	CUST_27316_PI429335447	GGACCCGACAGAGGTGAAAGAAATGAAGTCACGAATCTACATGTTTTTTCGCAAGGACAC	XP_004574905	NA	NA	PREDICTED: uncharacterized protein LOC101468485	0	NA	NA	M_beryllina_05_2013_comp102449_c0_seq1
M_beryllina_05_2013_comp102450_c0_seq1	CUST_19738_PI429335447	ATCTTGTCCAGTCTCTTAGTCGATTTGATTCTCAGGTGCGTCAGAAGGTGTCGATCATCA	XP_003458440	ENSDART00000124268	men1	menin-like isoform x1	GO:0005515,GO:0045892,GO:0005634	NA	NA	M_beryllina_05_2013_comp102450_c0_seq1
M_beryllina_05_2013_comp102454_c1_seq4	CUST_18187_PI429335447	ACTTCAAAACGGAAATATTTCCCACAAATCACAAAAAAGGTCGCGCCAAAGCTGAGCCCG	XP_004553712	ENSDART00000149571	ldb2a	lim-domain binding factor 2b	GO:0030274,GO:0003712,GO:0005667,GO:0045449	NA	NA	M_beryllina_05_2013_comp102454_c1_seq4
M_beryllina_05_2013_comp102460_c0_seq1	CUST_2698_PI429335447	CATCTTGCGTAATGGTCCAGATGAAGAAAACAGTTCAGCTGAACTTATTGCAGAGGACGG	XP_003438131	ENSDART00000032459	aqp1a.1	aquaporin 1	GO:0016021,GO:0015250,GO:0051739,GO:0035378,GO:0006833,GO:0035379	NA	NA	M_beryllina_05_2013_comp102460_c0_seq1
M_beryllina_05_2013_comp102471_c0_seq1	CUST_5854_PI429335447	ATCATGCACAGGTACAAAGTGAACCTGACATCAGCCAAGAGTCAAGAGAAACTGACAGAG	XP_004545773	ENSDART00000074438	cenpi	centromere protein i-like	GO:0003674,GO:0008150,GO:0005575	NA	NA	M_beryllina_05_2013_comp102471_c0_seq1
M_beryllina_05_2013_comp102472_c0_seq1	CUST_39505_PI429335447	AAGTACAGTCATTGGATCAAGAGTGTGATGAACAACTTCAGCCCAGCAACTACAACCCCT	AAC32753	ENSDART00000058945	zgc:92590	trypsin precursor	GO:0004252,GO:0006508	NA	NA	M_beryllina_05_2013_comp102472_c0_seq1
M_beryllina_05_2013_comp102475_c0_seq5	CUST_7879_PI429335447	AAACAGAAAGACAGGCCACCAGATCTGCAAGTTTCGCAAATGTGAGGAGCTGAAGAAGAA	XP_004564094	ENSDART00000110537	cxxc5a	cxxc-type zinc finger protein 5-like	GO:0048793,GO:0003677,GO:0008270	NA	NA	M_beryllina_05_2013_comp102475_c0_seq5
M_beryllina_05_2013_comp102479_c0_seq1	CUST_7465_PI429335447	TTGATGATCACAGATGGAGTGATATCTGACATGGTCCAGACCAAAGAGGCTGTGGTCAAT	XP_004070318	ENSDART00000143152	NA	copine-9-like	GO:0003674,GO:0008150,GO:0005575	NA	NA	M_beryllina_05_2013_comp102479_c0_seq1
M_beryllina_05_2013_comp102480_c0_seq1	CUST_9679_PI429335447	CTTCACGGTTTTGAGGTGGACTCTAGGGTCTACCTACTCATGAAAAAGCTTGCCTTCTAA	XP_003449050	ENSDART00000056188	POLR2H	dna-directed rna polymerases and iii subunit rpabc3	GO:0003899,GO:0006351,GO:0005730,GO:0006144,GO:0006206	NA	NA	M_beryllina_05_2013_comp102480_c0_seq1
M_beryllina_05_2013_comp102485_c0_seq6	CUST_40783_PI429335447	GAAGACACCTCAGCTTTCATATTTGTTCCTTCCAAAGAGGAGTTTTGTTTTAATTTCCTT	XP_003438646	ENSDART00000141414	C24H8orf33	upf0488 protein c8orf33 homolog	GO:0003674	NA	NA	M_beryllina_05_2013_comp102485_c0_seq6
M_beryllina_05_2013_comp102486_c0_seq1	CUST_1447_PI429335447	ATCAACATCCGAACCAAGAGGTCCAAAAACTCAGCCAACCAGTCAAAATGGAAAGGTTGC	XP_003442331	ENSDART00000003505	ADM	adrenomedullin 1	GO:0005576,GO:0005179,GO:0007165	NA	NA	M_beryllina_05_2013_comp102486_c0_seq1
M_beryllina_05_2013_comp102488_c0_seq2	CUST_36388_PI429335447	CAAATCCAGAAAATCCAGGTGCTCATCACAGTCTATGATTACGACAAACTGGGCAGCAAC	XP_004072047	ENSDART00000059197	syt5a	synaptotagmin-1-like isoform x1	GO:0016020,GO:0008021,GO:0006810,GO:0005215	NA	NA	M_beryllina_05_2013_comp102488_c0_seq2
M_beryllina_05_2013_comp102489_c0_seq5	CUST_26035_PI429335447	CAGAAAAAGGCTGCACACAGAGATTACCACACATCCAACAGGAGAGAGGCTTTGGTTTAA	XP_003446356	NA	NA	PREDICTED: hypothetical protein LOC100700823	0	NA	NA	M_beryllina_05_2013_comp102489_c0_seq5
M_beryllina_05_2013_comp102490_c0_seq1	CUST_20314_PI429335447	TGATGTCTGAATACTGGAGAGCTTGGTTGCTGCGTCTGGAAGACTTCACAGAGCAAAAAT	XP_004559838	ENSDART00000023379	mgme1	mitochondrial genome maintenance exonuclease 1-like	GO:0003674,GO:0008150,GO:0005575	NA	NA	M_beryllina_05_2013_comp102490_c0_seq1
M_beryllina_05_2013_comp102493_c0_seq2	CUST_40723_PI429335447	TCCACTCTGGACTTCGTGAAGGAGAAAGGCGTGGACGTCAGGGTCTTCCAGACCGCCAGG	XP_004574173	ENSDART00000036499	aamdc	upf0366 protein c11orf67-like protein	GO:0005737	NA	NA	M_beryllina_05_2013_comp102493_c0_seq2
M_beryllina_05_2013_comp102498_c0_seq1	CUST_26659_PI429335447	AGATCCTACAGCCGGGGCTCTACGAGCTGAGTCAGCACATGAAGCTGAAGCTGCAGTTCA	XP_004556946	ENSDART00000109268	C7H7orf43	PREDICTED: uncharacterized protein C7orf43 homolog isoform X1	0	NA	NA	M_beryllina_05_2013_comp102498_c0_seq1
M_beryllina_05_2013_comp102500_c0_seq1	CUST_3103_PI429335447	ATCAAGAGGAAATTGATCACCACAAAAAGGAGATTGAACGCCTCCAGCGTGAGATTGACC	XP_003962546	ENSDART00000064738	atpif1b	atpase mitochondrial precursor	GO:0006783,GO:0005739,GO:0045980,GO:0051346,GO:0030218,GO:0051117,GO:0051289,GO:0042803,GO:0009790,GO:0042030	NA	NA	M_beryllina_05_2013_comp102500_c0_seq1
M_beryllina_05_2013_comp102502_c0_seq3	CUST_5314_PI429335447	AAATTATGTGACTCCTGTGAAGAATCAGCAAAGCTGTGGTAGTTGCTGGACTTTCTCCAC	ACO82384	ENSDART00000060245	ctsh	cathepsin h precursor	GO:0008234,GO:0006508	NA	NA	M_beryllina_05_2013_comp102502_c0_seq3
M_beryllina_05_2013_comp102505_c0_seq1	CUST_23083_PI429335447	TTTCCATGTCAAGTACAGGGCACGCTTTTTCCATCTGGCTAATCTCTTCCTTAGCTCTAG	XP_003444450	ENSDART00000067001	noc4l	nucleolar complex protein 4 homolog	GO:0005730,GO:0031965,GO:0042254,GO:0016021	NA	NA	M_beryllina_05_2013_comp102505_c0_seq1
M_beryllina_05_2013_comp102511_c0_seq1	CUST_8965_PI429335447	ATTCTTCAGAGAGAGGAAGCTGAGAACAACCTGGCAGCTTTCAGAGCGGACGTGGACGCG	ACO09963	ENSDART00000065356	desmb	desm protein	GO:0045214,GO:0005882,GO:0060047,GO:0005198	NA	NA	M_beryllina_05_2013_comp102511_c0_seq1
M_beryllina_05_2013_comp102514_c0_seq1	CUST_29743_PI429335447	TTCCAGGGAAATTTCTCCCCTATTCCATTTTCGGGTATTTCCAAGCTCAATCTGGTGGCT	XP_003443382	ENSDART00000093343	fev	protein fev-like	GO:0006355,GO:0043565,GO:0007399,GO:0030154,GO:0003700,GO:0005667,GO:0045449	NA	NA	M_beryllina_05_2013_comp102514_c0_seq1
M_beryllina_05_2013_comp102515_c0_seq2	CUST_4015_PI429335447	CAACTAATTCAAGCAAGTCGTCTCATCAAATTCAATATGGAGAAGAAGATAGGATCTTAG	XP_004539507	ENSDART00000137572	mpc1	brain protein 44-like protein	0	NA	NA	M_beryllina_05_2013_comp102515_c0_seq2
M_beryllina_05_2013_comp102516_c1_seq6	CUST_4933_PI429335447	AGTTTCTCCACACGCAGGCACTCATGCATTGGCTTTGATGTGGAAAATGGATTATCAGTG	XP_004542465	ENSDART00000002096	pde4ca	---NA---	0	NA	NA	M_beryllina_05_2013_comp102516_c1_seq6
M_beryllina_05_2013_comp102517_c0_seq3	CUST_38167_PI429335447	ATCAACCTGCTCCAGCAGCAGATTCAGGTGAACATGCCCTACGTGATGATCCCGGCCTTC	XP_004559963	ENSDART00000019047	AL929022.1	transcription factor sox-13-like	GO:0006355,GO:0007275,GO:0003677	NA	NA	M_beryllina_05_2013_comp102517_c0_seq3
M_beryllina_05_2013_comp102523_c0_seq1	CUST_19561_PI429335447	TTCGATGACAGCCGCATTAATAAAGCCTTTGGGATACCTGAGGACTTTGACTATATGGAC	XP_003449751	ENSDART00000141648	mnd1	meiotic nuclear division protein 1 homolog	GO:0007126,GO:0005634,GO:0006310	NA	NA	M_beryllina_05_2013_comp102523_c0_seq1
M_beryllina_05_2013_comp102528_c0_seq1	CUST_6304_PI429335447	TGTCCACCAAGAGCTCCGAGAACAACACCCTGAACCCCGAGGTGATGAAGGAGATCCAGA	XP_004572499	ENSDART00000132328	cdyl	chromodomain y-like protein 2-like	GO:0008152,GO:0003824,GO:0005634	NA	NA	M_beryllina_05_2013_comp102528_c0_seq1
M_beryllina_05_2013_comp102530_c0_seq4	CUST_22324_PI429335447	ACAACGGACACAACTGTCTCCACTTGGCGTGCATTAATGGCTTCATCTCTTTAGTGGAAA	ABO40445	ENSDART00000130107	nfkbiaa	nf-kappa-b inhibitor alpha	GO:0009615	NA	NA	M_beryllina_05_2013_comp102530_c0_seq4
M_beryllina_05_2013_comp102533_c0_seq1	CUST_39409_PI429335447	AACCTGCAGAATAACTGTGACCCTACATTACCCAGCGTCCAATTCACTAAACCTGGATGA	XP_003458420	ENSDART00000101571	tyw5	trna wybutosine-synthesizing protein 5-like	GO:0031591,GO:0016706,GO:0000049,GO:0042803,GO:0005506	NA	NA	M_beryllina_05_2013_comp102533_c0_seq1
M_beryllina_05_2013_comp102537_c1_seq1	CUST_12895_PI429335447	TCATCATCAAAGGAGAAACCAAGGAGAACGCCGAGAGCTTCGTGGTGAACCTTCGCCCCC	XP_003446682	ENSDART00000053875	LGALS8 (1 of 2)	galectin-8-like	GO:0030246	NA	NA	M_beryllina_05_2013_comp102537_c1_seq1
M_beryllina_05_2013_comp102544_c0_seq1	CUST_13324_PI429335447	CAGGCCATGGTGGACAAGTACCGCTACCTGCTGTTTGCAGAGTCCAAAGTAAGTCCCTAA	XP_004560530	ENSDART00000098540	gltscr1	glioma tumor suppressor candidate region gene 1 isoform x3	0	NA	NA	M_beryllina_05_2013_comp102544_c0_seq1
M_beryllina_05_2013_comp102544_c0_seq3	CUST_13321_PI429335447	TTTGTGGCGAGCGTTCGGATGTTGGAGAGCGTTGTTTCCTCCCAGAGAGACTCTCCTGCT	XP_004560529	ENSDART00000098540	gltscr1	glioma tumor suppressor candidate region gene 1 isoform x2	0	NA	NA	M_beryllina_05_2013_comp102544_c0_seq3
M_beryllina_05_2013_comp102546_c0_seq3	CUST_11848_PI429335447	TGTTCTACCACCAGTACCAGCAGCTCATGGTGCAGGCCACGCCCATAACGGAGCTGCTGG	XP_003961115	ENSDART00000123533	CABZ01073954.1	fatty acid desaturase 6-like	0	NA	NA	M_beryllina_05_2013_comp102546_c0_seq3
M_beryllina_05_2013_comp102549_c1_seq1	CUST_31546_PI429335447	ATAAAGCTAAACAAAGCAGAAATAGAGCAGTCACAGCGTGTGGTGAAGGCAGACATCGTG	XP_003445231	ENSDART00000060766	rab11a	ras-related protein rab-28	GO:0006810,GO:0048856,GO:0007264,GO:0044767,GO:0016787,GO:0005525	NA	NA	M_beryllina_05_2013_comp102549_c1_seq1
M_beryllina_05_2013_comp102551_c0_seq2	CUST_15487_PI429335447	AGCATCGCGTCGCTGAGGCGCAAGGCACTGGAGCACACAGTCTCCATGAGCTTCACTTAG	XP_004547136	ENSDART00000027268	otpa	homeobox protein orthopedia b-like isoform 1	GO:0021854,GO:0006355,GO:0003700,GO:0000976,GO:0021884,GO:0005667,GO:0045449	NA	NA	M_beryllina_05_2013_comp102551_c0_seq2
M_beryllina_05_2013_comp102552_c0_seq1	CUST_7864_PI429335447	AAATAATGAAGATGCCCAGAACTTCCACTTCAGTGCCTGCTCATTCCACTTCCACTGATG	BAM99883	NA	NA	c-x-c motif chemokine 10 precursor	GO:0008009,GO:0006955,GO:0005576,GO:0006935,GO:0006954	NA	NA	M_beryllina_05_2013_comp102552_c0_seq1
M_beryllina_05_2013_comp102554_c0_seq2	CUST_12394_PI429335447	GGAGCGACGCTCATCTTTGAAGTAGAGCTGCTGAGTATCGAGAGAAGATCCGACCTTTGA	XP_003452386	ENSDART00000065397	fkbp2	fk506-binding protein 2 precursor	GO:0006457,GO:0000413,GO:0016020,GO:0003755,GO:0005528	NA	NA	M_beryllina_05_2013_comp102554_c0_seq2
M_beryllina_05_2013_comp102562_c0_seq1	CUST_12580_PI429335447	TACATCATACGCAATTTTCCCTTCTACGAGAAGAACAAAAAGGGCTGGCAAAACAGCATC	XP_003444957	ENSDART00000061828	foxl2	---NA---	0	NA	NA	M_beryllina_05_2013_comp102562_c0_seq1
M_beryllina_05_2013_comp102564_c0_seq5	CUST_15046_PI429335447	GTCACCATCATGCCCAAAGACATCCAGCTGGCTCGTAGGATAAGGGGAGAGAGGGCCTAA	CAG02570	ENSDART00000027623	h3f3a	histone	0	NA	NA	M_beryllina_05_2013_comp102564_c0_seq5
M_beryllina_05_2013_comp102568_c0_seq3	CUST_3529_PI429335447	TGCATAAAGTGTACTCCGCCAACCCAATTTTCGGAGTGGACTACGAAATGGAGGAAAAAC	XP_003447375	ENSDART00000058255	bbs5	bardet-biedl syndrome 5 protein homolog	GO:0032402,GO:0051877,GO:0001947,GO:0060170,GO:0070121,GO:0046907	NA	NA	M_beryllina_05_2013_comp102568_c0_seq3
M_beryllina_05_2013_comp102569_c0_seq1	CUST_22180_PI429335447	TCCAGCCTCCCCTTCTGTATGAATGGACTGAGGGGGGCTGCGGGGACAGAAGAGGACTGA	XP_004075706	ENSDART00000101511	npas3b	neuronal pas domain-containing protein 1-like	0	NA	NA	M_beryllina_05_2013_comp102569_c0_seq1
M_beryllina_05_2013_comp102571_c0_seq1	CUST_43132_PI429335447	TTCTGCTCCATGATGAAAGGAGGAAACATCGGCAAGCAAATTGTAAAGATATCGGAGTGA	XP_004540262	ENSDART00000103985	PTGR2	zinc-binding alcohol dehydrogenase domain-containing protein 1	GO:0016491,GO:0000166,GO:0055114,GO:0008270	NA	NA	M_beryllina_05_2013_comp102571_c0_seq1
M_beryllina_05_2013_comp102572_c0_seq1	CUST_5509_PI429335447	ATGAAGGAGCTTTTCTTCGAGGACAACATCGACGACGCGAAGTACTGCGGGCGCCTGTAC	XP_003454004	ENSDART00000018350	cnot8	ccr4-not transcription complex subunit 8-like	GO:0003676,GO:0030014,GO:0006355,GO:1900153,GO:0008285,GO:0031047,GO:0004535,GO:0008284,GO:0060213,GO:0005634,GO:0043928	NA	NA	M_beryllina_05_2013_comp102572_c0_seq1
M_beryllina_05_2013_comp102576_c0_seq1	CUST_33661_PI429335447	TGTCAACAAGAGAGGACGTGTTGTGAATTGCCCCTATGTAGATAATTCCTACAAATGGGC	XP_003440471	ENSDART00000059800	lactb	serine beta-lactamase-like protein mitochondrial-like	GO:0005575	NA	NA	M_beryllina_05_2013_comp102576_c0_seq1
M_beryllina_05_2013_comp102578_c0_seq7	CUST_6052_PI429335447	AATAACTGACATTAAGAAGCACAGGTGGTTTAGTGGATTCAACTGGGAGGGGCTGAAGGT	XP_003444513	ENSDART00000076929	prkg2	cgmp-dependent protein kinase 2-like	GO:0030553,GO:0006468,GO:0005524,GO:0004692,GO:0009069	NA	NA	M_beryllina_05_2013_comp102578_c0_seq7
M_beryllina_05_2013_comp102581_c0_seq2	CUST_16390_PI429335447	AAGCTGACTCCGAACACCTGGGAGTGGAAGCAGTGCACCAAGAGGCTGAGAGAGATTGCA	XP_004565283	ENSDART00000125902	ifit5	interferon-induced protein with tetratricopeptide repeats 5-like	GO:0008150,GO:0005575	NA	NA	M_beryllina_05_2013_comp102581_c0_seq2
M_beryllina_05_2013_comp102585_c0_seq1	CUST_14593_PI429335447	TTTAGAGAGAAGTACGGCGGTGAAATGCCCCAGCAGACAGATAACATCGTTTTCACATGT	ACQ58780	ENSDART00000125663	si:dkey-165n16.1	heat shock protein 67b2	GO:0006950,GO:0004792,GO:0016740	NA	NA	M_beryllina_05_2013_comp102585_c0_seq1
M_beryllina_05_2013_comp102588_c0_seq1	CUST_36472_PI429335447	AGATCAGGAGGGCTGTTAGGTACAAGAAAAACAACCCATGCAAGAAGCTGTTTTGCTGCT	XP_004540178	ENSDART00000064657	stx11a	syntaxin-11-like	GO:0016020,GO:0005484,GO:0016192,GO:0006886,GO:0005622	NA	NA	M_beryllina_05_2013_comp102588_c0_seq1
M_beryllina_05_2013_comp102589_c0_seq1	CUST_3124_PI429335447	TCACCTGGTGCTGAGTGGCCAGCTGAGCAGCGGCGCCCTCATCTCCTTCTTCATCTACCT	XP_004084689	ENSDART00000078649	abcb9	atp-binding cassette sub-family b member 9- partial	GO:0001916,GO:0046979,GO:0042825,GO:0035672,GO:0000166,GO:0042288,GO:0046686,GO:0046978,GO:0048002,GO:0015421,GO:0042605,GO:0006200,GO:0046980,GO:0007165,GO:0042612,GO:0019814	NA	NA	M_beryllina_05_2013_comp102589_c0_seq1
M_beryllina_05_2013_comp102591_c0_seq1	CUST_8209_PI429335447	AACACTGAAGACGGAGATGTGAGGAGGAGAAGTAATAAACTTGACAACTTGGATGACTGA	XP_003961965	ENSDART00000102876	cybrd1	cytochrome b reductase 1-like	GO:0016021,GO:0055114	NA	NA	M_beryllina_05_2013_comp102591_c0_seq1
M_beryllina_05_2013_comp102596_c0_seq1	CUST_32473_PI429335447	GAAACCTGGTGGAGAAAGATGAACTGCCTGATGGGAGAGCAGAGCCATGAAGTCAAATGA	XP_004065621	ENSDART00000046360	rhoua	rho-related gtp-binding	GO:0005525,GO:0005622,GO:0016020,GO:0007264	NA	NA	M_beryllina_05_2013_comp102596_c0_seq1
M_beryllina_05_2013_comp102599_c1_seq2	CUST_11083_PI429335447	GTATAGATGACATCAAACGCATTGGGGTCAGTTTGATTGGCCACCAGAGGAGAATCATAA	XP_004067187	ENSDART00000042984	epha6	ephrin type-a receptor 6-like	GO:0000166,GO:0051893,GO:0048013,GO:0006915,GO:0070507,GO:0010717,GO:0006468,GO:0032956,GO:0097156,GO:0005004,GO:0005769,GO:0097155,GO:0005887,GO:0016477,GO:0032319	NA	NA	M_beryllina_05_2013_comp102599_c1_seq2
M_beryllina_05_2013_comp102611_c0_seq5	CUST_38257_PI429335447	TTAAGGATGTTCAGTTACATCTAGAGCGCCAGTGGAACATGTGGATTCCTGGTTATGGCT	XP_004078314	ENSDART00000124208	taf12	transcription initiation factor tfiid subunit 12	GO:0003743,GO:0046982,GO:0006352,GO:0005669,GO:0005840,GO:0006446	NA	NA	M_beryllina_05_2013_comp102611_c0_seq5
M_beryllina_05_2013_comp102613_c0_seq5	CUST_31564_PI429335447	ACCTTCCTTGCTGTGTCTGGTTTTTGACTTAACCAATGAGCAGTCTTTTGCCAACTGCAG	XP_004574738	ENSDART00000053180	ift27	ras-related protein rab-35-like	GO:0007264,GO:0001822,GO:0042384,GO:0005525	NA	NA	M_beryllina_05_2013_comp102613_c0_seq5
M_beryllina_05_2013_comp102614_c0_seq2	CUST_11374_PI429335447	AACAAGCCCGATATGAACTACGAGACGATGGGCAGGGCCCTGAGGTACTACTACCAGCGT	XP_004086575	ENSDART00000011414	elf2b	ets-related transcription factor elf-2-like	GO:0006355,GO:0043565,GO:0005634,GO:0003677,GO:0003700	NA	NA	M_beryllina_05_2013_comp102614_c0_seq2
M_beryllina_05_2013_comp102615_c0_seq4	CUST_5242_PI429335447	TCTGCAGGACAAACTCCTGGAGAAAGGTGTGATCAGTGACGCAGAGATGAAACACATAAA	XP_004572977	ENSDART00000007074	gbp3	caspase recruitment domain-containing protein 8-like	0	NA	NA	M_beryllina_05_2013_comp102615_c0_seq4
M_beryllina_05_2013_comp102617_c0_seq1	CUST_937_PI429335447	TTCTATAAACTACACGAGAGAAAATGTGAACCCATAGTCATGACGGTGCCACGCAAGTCG	XP_003442446	ENSDART00000076830	coro1a	actin binding 1a	GO:0030027,GO:0008360,GO:0005884,GO:0045335,GO:0001891,GO:0050918,GO:0051126,GO:0032796,GO:0001845,GO:0007420,GO:0001654,GO:0051015,GO:0021952,GO:0030864,GO:0030595	NA	NA	M_beryllina_05_2013_comp102617_c0_seq1
M_beryllina_05_2013_comp102623_c1_seq4	CUST_16732_PI429335447	AAGATCTTCCAGAAGAAGAAGTCCTCGGTGACCTACAGCTTCCGGCAGTCCTTCCCGCTG	XP_003962976	ENSDART00000140410	iqsec2	iq motif and sec7 domain-containing protein 2-like	0	NA	NA	M_beryllina_05_2013_comp102623_c1_seq4
M_beryllina_05_2013_comp102626_c0_seq2	CUST_22198_PI429335447	ATTGTGCTGATCGAGTGGGGCAATAATCCAATCGAGCTGCTCATTAATGATAAGGTGGCT	XP_003438612	ENSDART00000066407	nptx2b	neuronal pentraxin-2-like	GO:0048168,GO:0042752	NA	NA	M_beryllina_05_2013_comp102626_c0_seq2
M_beryllina_05_2013_comp102627_c0_seq2	CUST_13438_PI429335447	AACAGATCCACCACTGTGAAGCTAACATGTGGGAAGGAAACTGTTGTGACATCTACCTCA	XP_004552216	ENSDART00000023814	prkcsh	glucosidase 2 subunit beta-like	GO:0016301,GO:0016310,GO:0005509,GO:0006491,GO:0048793,GO:0005783	NA	NA	M_beryllina_05_2013_comp102627_c0_seq2
M_beryllina_05_2013_comp102628_c0_seq1	CUST_35677_PI429335447	AGATTGACGAAAAACTCCTCTACGACACCTTTAGTGCGTTCGGTGTTATTCTCCAAACCC	XP_003968972	ENSDART00000004622	sf3b4	splicing factor 3b subunit 4-like	GO:0003676,GO:0000166	NA	NA	M_beryllina_05_2013_comp102628_c0_seq1
M_beryllina_05_2013_comp102632_c0_seq1	CUST_34822_PI429335447	TTACAGATGGAACCAGGTTCTGGACCCCAGCCTGAAGAAAGGCCCCTGGACCAAAGAGGA	XP_003978336	ENSDART00000141424	snapc4	snrna-activating protein complex subunit 4-like	GO:0009987,GO:0035622,GO:0031016,GO:0003677,GO:0008283,GO:0003682,GO:0000785	NA	NA	M_beryllina_05_2013_comp102632_c0_seq1
M_beryllina_05_2013_comp102644_c1_seq1	CUST_38185_PI429335447	TATAAATACCGTCCCCGCAGGAAGACCAAGACCCTGCTGAAAAAAGACAAGTACTCTTTG	ACH43024	ENSDART00000075617	sox3	transcription factor sox-3-like	GO:0007417,GO:0051091,GO:0003677,GO:0043049,GO:0007422,GO:0003700,GO:0030182,GO:0005667,GO:0045449	NA	NA	M_beryllina_05_2013_comp102644_c1_seq1
M_beryllina_05_2013_comp102647_c0_seq4	CUST_1858_PI429335447	TACAGACAGGGTGGGCAAAATGGTCTAAACAATAAGCTTTGTGCAAAGGGCATTATGTAA	XP_004564577	ENSDART00000123220	alkbh3	alpha-ketoglutarate-dependent dioxygenase alkb homolog 3-like	GO:0055114,GO:0016706	NA	NA	M_beryllina_05_2013_comp102647_c0_seq4
M_beryllina_05_2013_comp102657_c1_seq2	CUST_9907_PI429335447	AAAGAGGCATGAGCATGTGGTCTTTGTACAGGAACAAAAGGCACGAAATTCCCGTCAAAC	XP_004554805	ENSDART00000060399	drap1	dr1-associated corepressor-like	GO:0046982,GO:0043565,GO:0005634	NA	NA	M_beryllina_05_2013_comp102657_c1_seq2
M_beryllina_05_2013_comp102661_c4_seq2	CUST_18286_PI429335447	CATCAACAAGGAGATCAAGCTGATCCAAGAGGAGAAAGAGAACACGGAGTTACGGGCCGA	XP_003965062	ENSDART00000109953	PPFIA3	liprin-alpha-3-like	0	NA	NA	M_beryllina_05_2013_comp102661_c4_seq2
M_beryllina_05_2013_comp102662_c0_seq3	CUST_21052_PI429335447	TTTCTTTATCTCGTTGCCACCACCTACAACTATGCAGTCTTGCGGTTCCTTGGCAGAAAA	XP_004573421	ENSDART00000003514	plp1b	myelin proteolipid protein	GO:0016021	NA	NA	M_beryllina_05_2013_comp102662_c0_seq3
M_beryllina_05_2013_comp102664_c0_seq1	CUST_33340_PI429335447	TAAGTGGGACAAGAAGAGCAAGGAGCTCAAGTTTGCCATCAAGTACATGAAATCCCACCA	CAF98709	ENSDART00000056996	sfrp5	secreted frizzled-related protein 1 precursor	GO:0005737,GO:0009790,GO:0005886,GO:0017147,GO:0030900,GO:0001944,GO:0042813,GO:0001654,GO:0005576,GO:0008406,GO:0060070,GO:0030165,GO:0042995	NA	NA	M_beryllina_05_2013_comp102664_c0_seq1
M_beryllina_05_2013_comp102668_c0_seq2	CUST_14617_PI429335447	AATACAAGTTACCTGAGGGGGTTGATTTGCAGCACATCAGTTCATCACTGTCTGGTGATG	ACQ59038	ENSDART00000081225	BX649391.1	heat shock protein beta-1-like	GO:0005730,GO:0005737,GO:0009408,GO:0046685	NA	NA	M_beryllina_05_2013_comp102668_c0_seq2
M_beryllina_05_2013_comp102672_c0_seq1	CUST_20767_PI429335447	TGTTCAACAGTACATCCAGCAGAACATTCGGTCGGATTGCTCCAACATCGACAAAATCCT	XP_004569894	ENSDART00000078513	mob4	mps one binder kinase activator-like 3	GO:0016301,GO:0016310	NA	NA	M_beryllina_05_2013_comp102672_c0_seq1
M_beryllina_05_2013_comp102678_c0_seq1	CUST_19732_PI429335447	CATCAATTAACACCTACCAAGTTGATGAATGGAGTCCAAGGACTGATAATGGGTCTGCTG	XP_004541512	ENSDART00000126543	CR848746.2	membrane-spanning 4-domains subfamily a member 4d-like	0	NA	NA	M_beryllina_05_2013_comp102678_c0_seq1
M_beryllina_05_2013_comp102679_c0_seq1	CUST_21073_PI429335447	AAATGATGGAAAACATGGAAAGAATGTCCGGCTCGCCAAACTGTCAGACCTTTTCCTCCT	XP_004550853	ENSDART00000045210	mlf2	myeloid leukemia factor 2	GO:0003674,GO:0005575	NA	NA	M_beryllina_05_2013_comp102679_c0_seq1
M_beryllina_05_2013_comp102681_c0_seq2	CUST_9091_PI429335447	AAAGATAAAGCGAGAATTGGAACAGCTTTTGAAGGATCAAGGTTTCAGCTGTGTGTCGGA	XP_004067096	ENSDART00000073597	dhodh	dihydropyrimidine dehydrogenase	GO:0055114,GO:0004158,GO:0006222,GO:0006207,GO:0016020	NA	NA	M_beryllina_05_2013_comp102681_c0_seq2
M_beryllina_05_2013_comp102685_c1_seq3	CUST_8827_PI429335447	GTAAGAAATGTGATTCCCTCCTGGTTCCTCCGTCTCTGTACCGGCCGGTGTTCATCCTCC	XP_004565087	NA	NA	delta-like protein c-like	GO:0001757,GO:0042802,GO:0060218,GO:0007219,GO:0030165,GO:0048666,GO:0048471,GO:0005886	NA	NA	M_beryllina_05_2013_comp102685_c1_seq3
M_beryllina_05_2013_comp102685_c2_seq1	CUST_19471_PI429335447	ACGGACACAGATATCGATAAGGTGATGATCAATCTGAAGACGGAGGAGTTTGTGCTGGAT	XP_003451375	ENSDART00000059752	med16	mediator of rna polymerase ii transcription subunit 16-like	0	NA	NA	M_beryllina_05_2013_comp102685_c2_seq1
M_beryllina_05_2013_comp102689_c0_seq1	CUST_23731_PI429335447	ATACTTCATGGGCTACCTGTTCTTTCTGCTCTGCATGATTTGCTGGATGATTTACGGCTG	XP_003449838	ENSDART00000103371	zdhhc17	palmitoyltransferase zdhhc13-like	GO:0008270	NA	NA	M_beryllina_05_2013_comp102689_c0_seq1
M_beryllina_05_2013_comp102694_c0_seq3	CUST_9292_PI429335447	TATAAATATTCAGAGGCTCGAGTACAGAAAGATGGACATTACATCACCAGCCGTGGGCCA	XP_003454576	ENSDART00000041531	park7	dj-1 protein	GO:0008233,GO:0003729,GO:0006954,GO:0005739,GO:2000277,GO:0070301,GO:0050821,GO:0006508,GO:0043523,GO:0042803,GO:0060548,GO:0006914,GO:0007338,GO:0005634	NA	NA	M_beryllina_05_2013_comp102694_c0_seq3
M_beryllina_05_2013_comp102699_c0_seq2	CUST_5071_PI429335447	GGCGATATCCAGCAGCATGTTGTGAAAAATGTGTCAGAAGATTCTAAATGTATCAATTAA	XP_004570572	ENSDART00000092924	CPN2	carboxypeptidase n subunit 2-like	GO:0008150,GO:0005575	NA	NA	M_beryllina_05_2013_comp102699_c0_seq2
M_beryllina_05_2013_comp102701_c0_seq1	CUST_15985_PI429335447	TTACAGGACTTCTTCAATGGCAGAGATCTGAACAAAAGCATCAATCCAGATGAGGCGGTG	AGO01981	ENSDART00000025319	si:ch211-199o1.2	inducible heat shock protein 70	GO:0005524,GO:0006950	NA	NA	M_beryllina_05_2013_comp102701_c0_seq1
M_beryllina_05_2013_comp102703_c1_seq1	CUST_30775_PI429335447	AATTGTTCTAACGGCGACTATCATTGGCTGGTGCAGTCTCTCAGCCTCAAAGATCTTCAT	XP_004550397	ENSDART00000008593	yipf5	protein yipf5-like	GO:0000139,GO:0005789,GO:0016192,GO:0016021,GO:0015031	NA	NA	M_beryllina_05_2013_comp102703_c1_seq1
M_beryllina_05_2013_comp102704_c0_seq3	CUST_27799_PI429335447	AGAGAAATCAGCCGCAAGATGAGCACAAACTCTGAGTACGCAGTCATCTCTTATGCTTGA	XP_004543785	NA	NA	PREDICTED: uncharacterized protein LOC101486179	0	NA	NA	M_beryllina_05_2013_comp102704_c0_seq3
M_beryllina_05_2013_comp102707_c0_seq1	CUST_4342_PI429335447	GAAAAGACTGTTTAAAGAATCTCTGTCTACAGGCTCCAAACCTGAAAATGGCACTGCTTA	XP_004072403	ENSDART00000082624	C5H12orf65	c12orf65 homolog	GO:0003747,GO:0005840,GO:0006444,GO:0006449,GO:0018444	NA	NA	M_beryllina_05_2013_comp102707_c0_seq1
M_beryllina_05_2013_comp102710_c0_seq2	CUST_42997_PI429335447	ACTTCTCTCAGCTTTTCAACTTCCTGCCGCTCAACGGGCCTCCGTACAGTCAGTTGGGAG	XP_003457564	NA	NA	zinc finger protein plag1-like	GO:0008270,GO:0003676	NA	NA	M_beryllina_05_2013_comp102710_c0_seq2
M_beryllina_05_2013_comp102714_c0_seq1	CUST_8149_PI429335447	TGCCTGACAGCCTGCTGGACCGCTTTGTGTTGCTGCTGTCTTTGGGACATGCTCACATAA	XP_004073475	NA	NA	cysteine-rich and transmembrane domain-containing protein 1-like	GO:0003674,GO:0016021,GO:0016020,GO:0008150	NA	NA	M_beryllina_05_2013_comp102714_c0_seq1
M_beryllina_05_2013_comp102722_c0_seq1	CUST_22189_PI429335447	AACCACTTTTTGCAGAGAAACCTCCAGCAAGGTGGACTTGCTGAAGAAAACTTGTTCTGA	XP_004077618	ENSDART00000078154	npas4a	neuronal pas domain-containing protein 4-like	GO:0006355,GO:0006351,GO:0004871,GO:0007165,GO:0046983,GO:0005634,GO:0003677	NA	NA	M_beryllina_05_2013_comp102722_c0_seq1
M_beryllina_05_2013_comp102728_c0_seq1	CUST_14773_PI429335447	ACGCTTTGGGTGCTTGTCGCCTACCTCCTCTACAGGAAGAAGTTTTTCCTCAAAATTTAA	XP_004559683	ENSDART00000135383	si:dkey-192p21.6	heparan-alpha-glucosaminide n-acetyltransferase-like	0	NA	NA	M_beryllina_05_2013_comp102728_c0_seq1
M_beryllina_05_2013_comp102731_c0_seq1	CUST_23317_PI429335447	TATGCATGGGATAATGGACACCAAGTCACATATAACATCAAGTTGGCCTATGTAGACCCT	XP_004555081	ENSDART00000029620	olfml2ba	olfactomedin-like protein 2b-like	GO:0014032	NA	NA	M_beryllina_05_2013_comp102731_c0_seq1
M_beryllina_05_2013_comp102741_c0_seq6	CUST_15835_PI429335447	TACTGACTCTCATTCGCTCAGTTCGGACCGTCATGAGAGTGCCTTTGATCATAGTAAACT	XP_003444416	ENSDART00000057865	ier3ip1	immediate early response 3-interacting protein 1-like	GO:0016021,GO:0008152,GO:0005789,GO:0016787	NA	NA	M_beryllina_05_2013_comp102741_c0_seq6
M_beryllina_05_2013_comp102743_c0_seq4	CUST_16045_PI429335447	CAGAGTATTTGGCACAGCCATCTGAGAGGATGAAGAAAGAAAGAAAAACAAAGGCGCCTA	XP_004550917	ENSDART00000032877	ino80e	ino80 complex subunit e-like	GO:0031011,GO:0006281,GO:0007420,GO:0006260	NA	NA	M_beryllina_05_2013_comp102743_c0_seq4
M_beryllina_05_2013_comp102748_c0_seq1	CUST_22543_PI429335447	AGAAATACTGTACGTGGATACAGGTGCAATACCCAATCATCTCAGAGTGCAAGTGCTCGT	ACX71862	ENSDART00000063231	nog2	noggin 3	GO:0035844,GO:0045596,GO:0030514,GO:0051216,GO:0009953,GO:0007368,GO:0005576,GO:0048793	NA	NA	M_beryllina_05_2013_comp102748_c0_seq1
M_beryllina_05_2013_comp102750_c0_seq1	CUST_34369_PI429335447	AAGGAACCAAGCTCGATGAAGACTTCAAAGAAATGGAGAAGAAGGTGGACATCACCAGTC	XP_004573974	ENSDART00000152406	sh3gl2	sh3-domain grb2-like 2-like	GO:0005737	NA	NA	M_beryllina_05_2013_comp102750_c0_seq1
M_beryllina_05_2013_comp102750_c2_seq1	CUST_10885_PI429335447	ACAGGATAAAGGAGGTTTCCAGCAAACCCAGGAAGGAGTTCGCGCCCAAACCGCGGATGA	XP_004086788	ENSDART00000067630	SH3GL2 (2 of 2)	endophilin-a1-like	GO:0005737	NA	NA	M_beryllina_05_2013_comp102750_c2_seq1
M_beryllina_05_2013_comp102752_c0_seq1	CUST_10216_PI429335447	AAGATCGTGAAGAACAAAAACAAGAACGGGCGCATCGTCATCGTCATGAGCAAGTACATG	XP_004065687	ENSDART00000104272	cbx4	e3 sumo-protein ligase cbx4-like	GO:0005634	NA	NA	M_beryllina_05_2013_comp102752_c0_seq1
M_beryllina_05_2013_comp102755_c0_seq1	CUST_13531_PI429335447	AATCCATCTAAATCTGGCAGCCAGACAAACCTCAGTATCCAGCAACGAACACAGAGAACA	XP_004074303	ENSDART00000128837	grin2da	glutamate receptor nmda 2d-like	0	NA	NA	M_beryllina_05_2013_comp102755_c0_seq1
M_beryllina_05_2013_comp102756_c0_seq1	CUST_14608_PI429335447	TTTGTGTCCAGATGCTTCACCAGGAAATACACGCTGCCGCCCACGGCCACCATTGACAAG	BAH59273	ENSDART00000060162	hspb1	heat shock protein beta-1	GO:0005730,GO:0005737,GO:0009408,GO:0046685	NA	NA	M_beryllina_05_2013_comp102756_c0_seq1
M_beryllina_05_2013_comp102761_c0_seq3	CUST_19237_PI429335447	CAGGAAAAACTTAGATGGGGCTAACCAGATTGTGAACCACAAGTTACAGTCCTTGGTGTC	XP_003459115	ENSDART00000129407	plin2	mannose-6-phosphate receptor-binding protein 1	GO:0003674,GO:0008150,GO:0005575,GO:0046872,GO:0008270,GO:0003677	NA	NA	M_beryllina_05_2013_comp102761_c0_seq3
M_beryllina_05_2013_comp102766_c0_seq1	CUST_38845_PI429335447	TGAGAAAATCTCATGAGACAGGATTTCTGTCATGGTTCAGGAACGGCTTGTTGGCAACTG	XP_004075450	ENSDART00000101504	tmem160	transmembrane protein 160-like	GO:0016020	NA	NA	M_beryllina_05_2013_comp102766_c0_seq1
M_beryllina_05_2013_comp102772_c0_seq2	CUST_11593_PI429335447	TCTTGAAACCAGAGGTGATGGAGGAGATTGTGCTATTGACACAACAGAAGCTGTTGGAAC	ACQ58453	ENSDART00000149195	exosc2	exosome complex exonuclease rrp4	GO:0003723,GO:0000178,GO:0004527	NA	NA	M_beryllina_05_2013_comp102772_c0_seq2
M_beryllina_05_2013_comp102774_c0_seq3	CUST_23695_PI429335447	ATGAACATGGCCAACAGCATCGCCAACCTGCGGCTCAAAGCCAAGGAGTACAGCCTGAAC	XP_004068190	ENSDART00000061588	prrx1b	paired-like homeobox 2b	GO:0048484,GO:0006355,GO:0043565,GO:0010628,GO:0003700,GO:0005667,GO:0045449	NA	NA	M_beryllina_05_2013_comp102774_c0_seq3
M_beryllina_05_2013_comp102779_c0_seq1	CUST_11173_PI429335447	TGCATAATGATAGCAGCCTCCATCTACACAGCTGAGCTCCACACCGGTGAGGCAACGGGA	XP_003976955	ENSDART00000101477	emp1	epithelial membrane protein 2-like	GO:0016021	NA	NA	M_beryllina_05_2013_comp102779_c0_seq1
M_beryllina_05_2013_comp102787_c0_seq1	CUST_27763_PI429335447	GACTTTCAGGAAAAACTTATCCTCAATGTGGACAAGGCTCTGAAGAAAGTGGGTCTGCTT	XP_004540330	ENSDART00000110897	si:dkey-56i24.1	PREDICTED: uncharacterized protein LOC101484629 isoform X2	0	NA	NA	M_beryllina_05_2013_comp102787_c0_seq1
M_beryllina_05_2013_comp102802_c0_seq4	CUST_31474_PI429335447	ATCATTCTACTGGGGAACAAGCTGGATATGAACAGATACAGGCAGGTGAGTCAGTGTGAT	XP_004066883	ENSDART00000018801	rasl12	ras-like protein family member 12-like	GO:0043167,GO:0000166,GO:0007165	NA	NA	M_beryllina_05_2013_comp102802_c0_seq4
M_beryllina_05_2013_comp102809_c1_seq1	CUST_6985_PI429335447	TACTGCATATGGTGTGGGACTGCCTATAATGATGAAGAGGATTTGTGCTCCAACTGTCCA	XP_004559808	ENSDART00000034541	gpatch11	coiled-coil domain-containing protein 75-like	GO:0051897,GO:0001525,GO:0001570,GO:0003676,GO:0060841	NA	NA	M_beryllina_05_2013_comp102809_c1_seq1
M_beryllina_05_2013_comp102811_c0_seq1	CUST_35005_PI429335447	TAAAATGTTTTTTCCATATTATGGCAAGAAAGCTCACGCGGAGTATGTGCAGCCGCTGGT	XP_003460143	ENSDART00000022549	atp1b3a	sodium potassium-transporting atpase subunit beta-3-like	GO:0006813,GO:0005890,GO:0006814	NA	NA	M_beryllina_05_2013_comp102811_c0_seq1
M_beryllina_05_2013_comp102826_c0_seq3	CUST_13129_PI429335447	AAAGCATCCAGACCAGGAAACGCAAACCCAAGATGCCCAAGAACAAAAACTCCACAGTTT	XP_003457894	ENSDART00000012194	gata5	gata-binding factor 5-a-like	GO:0005515,GO:0031016,GO:0055007,GO:0060972,GO:0048618,GO:0030878,GO:0060975,GO:0070121,GO:0001947,GO:0003677,GO:0030099,GO:0048538,GO:0003700,GO:0045944,GO:0001889,GO:0001706,GO:0005667,GO:0045449	NA	NA	M_beryllina_05_2013_comp102826_c0_seq3
M_beryllina_05_2013_comp102827_c0_seq3	CUST_41041_PI429335447	TGTGAGAAGAACGAGAACTTGGCTGCCAACTTCCTTTTACAACAGAACTTTGACGATGAC	XP_003455006	ENSDART00000124615	rad23b	uv excision repair protein rad23 homolog b-like	GO:0043161,GO:0003684,GO:0006289,GO:0005634	NA	NA	M_beryllina_05_2013_comp102827_c0_seq3
M_beryllina_05_2013_comp102830_c0_seq2	CUST_19366_PI429335447	AAACTAGAAGACAGCAGCTTGAAGATCGTCAAGCTGGGTGAAATCACAAAGGACTGGCTT	XP_004539725	ENSDART00000026712	mmp2	matrix metalloproteinase 2	GO:0005581,GO:0004222,GO:0006508,GO:0008270	NA	NA	M_beryllina_05_2013_comp102830_c0_seq2
M_beryllina_05_2013_comp102831_c0_seq3	CUST_11401_PI429335447	GAAAATGTTTTGAGAAGATACATCAAGGAATATGTGACGTGTCACACTTGCCGCTCCCCA	ACI33790	ENSDART00000075009	eif2s2	eukaryotic translation initiation factor 2 subunit 2	GO:0003743,GO:0005840,GO:0006446	NA	NA	M_beryllina_05_2013_comp102831_c0_seq3
M_beryllina_05_2013_comp102841_c0_seq2	CUST_23299_PI429335447	CATGTTTGTGAAGAATGCAAGAAAAAAGCTGCACCTACGGAAGAAGTCAAGGGTGAATAG	ACQ58714	ENSDART00000074167	ociad2	ocia domain-containing protein 2	GO:0003674,GO:0008150,GO:0005768	NA	NA	M_beryllina_05_2013_comp102841_c0_seq2
M_beryllina_05_2013_comp102844_c0_seq1	CUST_15991_PI429335447	GAGAGAAACCGTCCATGGTCAGTTCGCATATTACTTCCAGCCCTCCATCAACCTCCGACA	XP_003453222	ENSDART00000057348	inha	inhibin alpha chain-like	GO:0008083,GO:0005576	NA	NA	M_beryllina_05_2013_comp102844_c0_seq1
M_beryllina_05_2013_comp102844_c0_seq2	CUST_15994_PI429335447	CATGAGGTCTGCGGAGGTGACCACCACGTCGGACGGAGGGTACTCGTTCAGGCGCGAGAT	XP_004562608	ENSDART00000057348	inha	inhibin alpha subunit	GO:0008083,GO:0005576,GO:0005179,GO:0040007	NA	NA	M_beryllina_05_2013_comp102844_c0_seq2
M_beryllina_05_2013_comp102849_c0_seq1	CUST_7564_PI429335447	ACAACAACATCATGGGCATAGAGAACATCTGCGAGCTGGCGGCGCGGATGCTTTTCAGCG	XP_004539836	ENSDART00000130163	nr2f2	coup transcription factor 2-like isoform x2	GO:0043401,GO:0008270,GO:0006355,GO:0030522,GO:0043565,GO:0003707,GO:0004879,GO:0060838,GO:0001946,GO:0005634	NA	NA	M_beryllina_05_2013_comp102849_c0_seq1
M_beryllina_05_2013_comp102849_c1_seq1	CUST_7555_PI429335447	TCTTTGTACGTCTGGTGGGGAAAACTCCCATTGAAACTCTAATAAGGGACATGCTGCTGT	CAF94879	ENSDART00000059976	nr2f2	coup transcription factor 2-like	GO:0043401,GO:0008270,GO:0006355,GO:0030522,GO:0043565,GO:0003707,GO:0004879,GO:0060838,GO:0001946,GO:0005634	NA	NA	M_beryllina_05_2013_comp102849_c1_seq1
M_beryllina_05_2013_comp102859_c0_seq2	CUST_40648_PI429335447	GAAAAAAGACGAATCCAAGCTCCTGAAGAACCTCATCACAGACCTCCGGGTGGACGGCGC	XP_004552818	ENSDART00000088542	MYO5B (1 of 3)	---NA---	0	NA	NA	M_beryllina_05_2013_comp102859_c0_seq2
M_beryllina_05_2013_comp102864_c0_seq4	CUST_12586_PI429335447	TCAGCAAAGCAAACGGCTGCTTCCCCGACTATTCTGCCAGCCAAACAGCCTGCTTGTTTC	XP_004550607	NA	NA	formin-1-like isoform x1	0	NA	NA	M_beryllina_05_2013_comp102864_c0_seq4
M_beryllina_05_2013_comp102864_c1_seq1	CUST_26149_PI429335447	TTTCTGGACCAGATCTCACAGTTTCTGAACAGAGACAAAAAGGGAGACGAGAAGGAAGAG	XP_003446376	NA	NA	PREDICTED: hypothetical protein LOC100706280	0	NA	NA	M_beryllina_05_2013_comp102864_c1_seq1
M_beryllina_05_2013_comp102866_c0_seq1	CUST_26146_PI429335447	AAATAAACAGACCCAAAACGGATCTGGGGAAGCGGCTGTTTAAGCGGCGGCGCGTTCTGG	XP_003448788	NA	NA	PREDICTED: hypothetical protein LOC100705864	0	NA	NA	M_beryllina_05_2013_comp102866_c0_seq1
M_beryllina_05_2013_comp102875_c1_seq1	CUST_40567_PI429335447	TCACAGATGAGGAGTTGTTCATCCGCTGGCTGGAGATTGTGGCCTTCCTACCAGTTATGA	XP_003440530	ENSDART00000089278	si:ch211-236l14.4	uncharacterized family 31 glucosidase kiaa1161-like	GO:0005975,GO:0004553	NA	NA	M_beryllina_05_2013_comp102875_c1_seq1
M_beryllina_05_2013_comp102879_c0_seq1	CUST_6592_PI429335447	TTGTTCAAGTGGATGAGCTCATGGAAACTTTCAGGAGATGCACACTTCCTGAGACTGTTG	XP_003442284	ENSDART00000025423	cstf3	cleavage stimulation factor subunit 3-like	GO:0006397,GO:0005634	NA	NA	M_beryllina_05_2013_comp102879_c0_seq1
M_beryllina_05_2013_comp102880_c0_seq2	CUST_19813_PI429335447	TCTGTTTTCACTCTGTCTTGTATGTTAATCTGGCCTTTGTCACACATGCTCACCTCCTGA	XP_004555069	ENSDART00000129193	si:ch211-120j21.1	metalloprotease tiki2-like	0	NA	NA	M_beryllina_05_2013_comp102880_c0_seq2
M_beryllina_05_2013_comp102881_c0_seq1	CUST_38677_PI429335447	AAGTACAGCACTCACTCAATTGGAGTCGTCCTGCGTAGCCATTCATGAAGTCTTGAAAGT	XP_004067455	ENSDART00000046689	tmed3	transmembrane emp24 domain-containing protein 3 precursor	GO:0006810,GO:0016021	NA	NA	M_beryllina_05_2013_comp102881_c0_seq1
M_beryllina_05_2013_comp102882_c0_seq1	CUST_18091_PI429335447	TACCAGAACAGAAGAATGAAATGGAAGAAAATTGTCCTACAAGGCGGAGGCCTGGAGTCA	CBN80630	ENSDART00000023889	barx1	-like homeobox 1	GO:0060037,GO:0051216,GO:0006355,GO:0002053,GO:0003700,GO:0000976,GO:0005667,GO:0045449	NA	NA	M_beryllina_05_2013_comp102882_c0_seq1
M_beryllina_05_2013_comp102887_c0_seq1	CUST_26542_PI429335447	TCTAGCACTGATGCAACTAACACTCTCAAACAAGAAACCTCAAGCACTGAAGAGGGATAA	XP_003451634	ENSDART00000139540	C9H17orf105 (2 of 2)	PREDICTED: uncharacterized protein C17orf105 homolog	0	NA	NA	M_beryllina_05_2013_comp102887_c0_seq1
M_beryllina_05_2013_comp102890_c0_seq1	CUST_32785_PI429335447	ATCCAGATGTGGCTGCAGACCAGCCGGAGCCAGTCCTGCCCCTTCTGCCCCGCCAAGTAG	XP_004555819	ENSDART00000139771	RNF214 (1 of 2)	ring finger protein 214-like	0	NA	NA	M_beryllina_05_2013_comp102890_c0_seq1
M_beryllina_05_2013_comp102891_c0_seq4	CUST_32884_PI429335447	TCATGTTCCTGTCGGCCCCGGAGAGGACGGTGCTCAGAGAGCTGTTCCACTTCCTGCTGA	ACI34156	ENSDART00000122535	RPAP3 (2 of 2)	rna polymerase ii-associated protein 3-like	0	NA	NA	M_beryllina_05_2013_comp102891_c0_seq4
M_beryllina_05_2013_comp102895_c0_seq1	CUST_2569_PI429335447	ATTTTGACATCGCCACCGACAACTGGCAGCTCCTGCCTCCCATCAACGCTTACCTGCTCG	CBN80620	ENSDART00000113185	AP5B1	ap-5 complex subunit beta-1-like	0	NA	NA	M_beryllina_05_2013_comp102895_c0_seq1
M_beryllina_05_2013_comp102897_c0_seq2	CUST_15328_PI429335447	AGATATGGTTCCAGAACCGGAGATCCAAGTTCAAGAAACTGTACAAAAACGGGGAGGTAC	XP_003438792	ENSDART00000017191	dlx3b	homeobox protein dlx3b-like	GO:0035270,GO:0043010,GO:0051216,GO:0006355,GO:0043049,GO:0003700,GO:0021559,GO:0048666,GO:0000976,GO:0005667,GO:0045449	NA	NA	M_beryllina_05_2013_comp102897_c0_seq2
M_beryllina_05_2013_comp102900_c0_seq3	CUST_14407_PI429335447	GAAAAGTTTGGACCTGCGCCACATCGTGGCCATGATCCACAACAGGAGGCACAGCGTGTA	BAB83093	ENSDART00000023588	guca1a	guanylate cyclase activating protein 1	GO:0030250,GO:0005509	NA	NA	M_beryllina_05_2013_comp102900_c0_seq3
M_beryllina_05_2013_comp102902_c0_seq1	CUST_21100_PI429335447	AGCAGGTTTTCCTCCAGCTTCAAATCCTGCAAAATCAACAACAACAGCAGCAGCAACAGA	XP_004550761	ENSDART00000122111	si:dkeyp-69b9.3	myocardin-like isoform x2	GO:0003676	NA	NA	M_beryllina_05_2013_comp102902_c0_seq1
M_beryllina_05_2013_comp102902_c0_seq7	CUST_21097_PI429335447	AGCAGGTTTTCCTCCAGCTTCAAATCCTGCAAAATCAACAACAACAGCAGCAGCAACAGA	XP_004550760	ENSDART00000122111	si:dkeyp-69b9.3	myocardin-like isoform x1	GO:0003676	NA	NA	M_beryllina_05_2013_comp102902_c0_seq7
M_beryllina_05_2013_comp102905_c0_seq3	CUST_2656_PI429335447	AAAGGGATGAAAAACCTGAGGGCTCTCCTCTCTAGCCTTGAAGAATGTTCACACATGAGT	XP_004568604	NA	NA	apoptosis-associated speck-like protein containing a card	GO:0005525,GO:0042981,GO:0003924,GO:0005622	NA	NA	M_beryllina_05_2013_comp102905_c0_seq3
M_beryllina_05_2013_comp102909_c0_seq1	CUST_18487_PI429335447	ACTGGAGAAGAAAGTGGAGTCCCTGCTGGACGAGATCGCCTTCCTCAGGAAAGTGCACGA	XP_004567340	ENSDART00000018351	INA (2 of 3)	low molecular weight neuronal intermediate filament-like	GO:0005882,GO:0005198	NA	NA	M_beryllina_05_2013_comp102909_c0_seq1
M_beryllina_05_2013_comp102910_c0_seq2	CUST_38122_PI429335447	CCACAGGAAGTGAGAGACTTTGCTCTGACTCAGCAGAAGCTTTCTTCACCTGATGCTTGA	XP_003453927	NA	NA	transcription factor iiib 50 kda subunit-like	GO:0046872,GO:0006355,GO:0006352,GO:0006351,GO:0008270,GO:0005634	NA	NA	M_beryllina_05_2013_comp102910_c0_seq2
M_beryllina_05_2013_comp102910_c0_seq3	CUST_38248_PI429335447	TTATCTAGCCTGGCAGTCATTGAACCCCAACAAGCATCGCATCAAACTGTCTCTGGATAA	XP_003453927	ENSDART00000020297	brf2	transcription initiation factor iib	GO:0005488,GO:0044238,GO:0034645,GO:0010467	NA	NA	M_beryllina_05_2013_comp102910_c0_seq3
M_beryllina_05_2013_comp102913_c0_seq2	CUST_14005_PI429335447	TCTTGGAAAACCTGTATTTCGTGGGGATCTACGGCAGCGTCTACATCATTATGTGCATAG	XP_004079399	ENSDART00000142394	gpr55a	g-protein coupled receptor 55-like	GO:0004930,GO:0007186	NA	NA	M_beryllina_05_2013_comp102913_c0_seq2
M_beryllina_05_2013_comp102914_c0_seq1	CUST_9502_PI429335447	GCTGCTGGAGCGCCTGCTCAGGGACTACAGATTCACCGTGTTCGCCACCTGCCACCCGGT	XP_003457218	ENSDART00000005804	XRCC2	dna repair protein xrcc2-like	GO:1901363,GO:0097159	NA	NA	M_beryllina_05_2013_comp102914_c0_seq1
M_beryllina_05_2013_comp102919_c0_seq2	CUST_30034_PI429335447	ACTTGTACGAAACTCAGTTTTTCGGTTTCACTCCGCAAACATGCATGCTGCGGATCTACA	XP_004539528	ENSDART00000033923	MIS12	protein mis12 homolog	GO:0000775,GO:0007067,GO:0005634	NA	NA	M_beryllina_05_2013_comp102919_c0_seq2
M_beryllina_05_2013_comp102922_c0_seq1	CUST_37528_PI429335447	TCCCCAAACTGCAGTTTGAGGACTTCATGGAGAAGGTGGAGAAGCTGGGCGGCAAGAAGG	XP_004086098	ENSDART00000052474	tipin	timeless interacting protein	GO:0000790,GO:0033261,GO:0000076,GO:0031573,GO:0008284	NA	NA	M_beryllina_05_2013_comp102922_c0_seq1
M_beryllina_05_2013_comp102935_c0_seq1	CUST_39613_PI429335447	GGTTATGTAGCTGCTTACAAAGGCACTGGGACTTATGAGGACAAAGTTAAAGATGCATGA	XP_004539250	ENSDART00000036760	TPPP2	tubulin polymerization-promoting protein family member 3-like	GO:0005509	NA	NA	M_beryllina_05_2013_comp102935_c0_seq1
M_beryllina_05_2013_comp102936_c0_seq2	CUST_41767_PI429335447	CTGATGACGGCTATATCAAAATATATGATGTGCAACAAGCCATTCTGGCCGGCACACTGA	AAH62834	ENSDART00000130809	WDR61	wd repeat-containing protein 61	GO:0055087,GO:0045944,GO:0016593,GO:0032968,GO:0035327	NA	NA	M_beryllina_05_2013_comp102936_c0_seq2
M_beryllina_05_2013_comp102937_c0_seq3	CUST_24187_PI429335447	AGAGGTTTCACCAGCTGGGGGATGTCAACGTGTTCGGGGTGCTAGACACTACCGAAAAAA	XP_004551705	ENSDART00000110157	tysnd1	peroxisomal leader peptide-processing protease-like	GO:0004252,GO:0006508	NA	NA	M_beryllina_05_2013_comp102937_c0_seq3
M_beryllina_05_2013_comp102940_c0_seq1	CUST_16885_PI429335447	TTTTTCTTTTTGTCGAGGCTTTTGGGGAATTGCCGAGACCTGTTTCATGCATGTCCACTG	XP_004070167	ENSDART00000048614	jph3	junctophilin-3-like	0	NA	NA	M_beryllina_05_2013_comp102940_c0_seq1
M_beryllina_05_2013_comp102947_c0_seq1	CUST_23053_PI429335447	CTAAAAGGGTGTTTGCTATATTCCGTCAGTGGCAGGTATCTTCTTCTCCATCTCAGCAGA	XP_004548303	ENSDART00000090837	zc3hc1	nuclear-interacting partner of alk-like	GO:0005634,GO:0008270	NA	NA	M_beryllina_05_2013_comp102947_c0_seq1
M_beryllina_05_2013_comp102948_c0_seq2	CUST_24307_PI429335447	AAATACTTTGATTTCGACCATGAAATCCTGTCCTTCGCCAACGAGAACTGGGACTCCTTG	XP_004568614	ENSDART00000080059	PHF1	phd finger protein 1-like	GO:0046872,GO:0008270,GO:0005575	NA	NA	M_beryllina_05_2013_comp102948_c0_seq2
M_beryllina_05_2013_comp102951_c0_seq1	CUST_25954_PI429335447	AACTCTCTAAAAGAAGAGCTGGGCGCACTGTCGGCAAAGTTTGAAAGAGTTGAGGGTTTT	XP_003450086	ENSDART00000147704	si:dkey-282h22.5	PREDICTED: hypothetical protein LOC100697964	0	NA	NA	M_beryllina_05_2013_comp102951_c0_seq1
M_beryllina_05_2013_comp102953_c0_seq1	CUST_5647_PI429335447	TTCATTAAGAACATGAGGCAACACGATATGCGCAATGGAAGGTATGAAGGCAAACAGCCC	XP_003437899	ENSDART00000089207	cables1	cdk5 and abl1 enzyme substrate 2-like	GO:0044763,GO:0007399,GO:0050794	NA	NA	M_beryllina_05_2013_comp102953_c0_seq1
M_beryllina_05_2013_comp102958_c0_seq2	CUST_41341_PI429335447	AATATATGGTAGATGTTGCTGAAAATGAGGCAAAGATGGCTTACATGAGGCCACCCAGTG	XP_004067679	ENSDART00000011863	hdlbp	vigilin-like isoform 1	GO:0003723,GO:0042221	NA	NA	M_beryllina_05_2013_comp102958_c0_seq2
M_beryllina_05_2013_comp102961_c0_seq1	CUST_31465_PI429335447	TGAATATGTCAAAATGATCAGACAGCAGATAGTAGAGAACAGGGAGGGCAGCAGTAGTGA	XP_004072418	ENSDART00000089968	rasl10a	ras-like protein family member 10b-like	GO:0007264,GO:0006184,GO:0003924,GO:0016020,GO:0005525	NA	NA	M_beryllina_05_2013_comp102961_c0_seq1
M_beryllina_05_2013_comp102961_c0_seq2	CUST_14320_PI429335447	TGAATATGTCAAAATGATCAGACAGCAGATAGTAGAGAACAGGGAGGGCAGCAGTAGTGA	XP_004072418	ENSDART00000089968	rasl10a	gtp-binding protein rhes-like	GO:0007264,GO:0006184,GO:0003924,GO:0016020,GO:0005525	NA	NA	M_beryllina_05_2013_comp102961_c0_seq2
M_beryllina_05_2013_comp102968_c0_seq1	CUST_7192_PI429335447	TCAATCTCCAACGAAGACTTCACCAATTTACAGCTTCTTCTGAAGGCTCCGTCGAAAGAC	XP_004069830	ENSDART00000092925	commd9	comm domain-containing protein 9	GO:0003674,GO:0008150,GO:0005575	NA	NA	M_beryllina_05_2013_comp102968_c0_seq1
M_beryllina_05_2013_comp102972_c0_seq1	CUST_19219_PI429335447	TACAAAAATGTGCGGCCTGACTATGTGAAGGCTATCTGGAATGTAGTCAACTGGGAGAAC	AFO64916	ENSDART00000062556	sod2	manganese superoxide dismutase	GO:0046686,GO:0046872,GO:0006801,GO:0004784,GO:0051597,GO:0055114	NA	NA	M_beryllina_05_2013_comp102972_c0_seq1
M_beryllina_05_2013_comp102974_c0_seq1	CUST_27289_PI429335447	ACCTTAGAGAAAACTCTGCTCAATATAGGATTTCGACTCAACAAACTCATCCAACAATGA	XP_004548191	NA	NA	PREDICTED: uncharacterized protein LOC101467981	0	NA	NA	M_beryllina_05_2013_comp102974_c0_seq1
M_beryllina_05_2013_comp102976_c0_seq1	CUST_24091_PI429335447	AGTTCTTCATCTGCACTGTTAAAACAGAATGGCTGGACGGCAGACATGTTGTGTTTGGCA	CBN81512	ENSDART00000074768	ppifb	peptidyl-prolyl cis-trans mitochondrial precursor	GO:0006457,GO:0000413,GO:0003755	NA	NA	M_beryllina_05_2013_comp102976_c0_seq1
M_beryllina_05_2013_comp102981_c0_seq2	CUST_40123_PI429335447	GATGCCTTTTTGAGAGGAAACAATGTCCTATACATCAGTACCCAGAAGAGGAAGATGTAG	ACN09928	ENSDART00000147458	lsm6	u6 snrna-associated sm-like protein lsm6	GO:0003674	NA	NA	M_beryllina_05_2013_comp102981_c0_seq2
M_beryllina_05_2013_comp102983_c0_seq1	CUST_42529_PI429335447	ACAAAGTACACTTTGATCGACGAGCAGGACATTCCGCTTGTGGAAAACTATGCCTTTGAG	AEE36641	ENSDART00000011332	zmynd19	zinc finger mynd domain-containing protein 19-like	GO:0008270	NA	NA	M_beryllina_05_2013_comp102983_c0_seq1
M_beryllina_05_2013_comp102993_c0_seq1	CUST_32638_PI429335447	TCTTTCTCAAAGAAAGATTTTATCAGCGTGCTGAGGAGAGAAGAGGGAGTCGGCAAAACC	XP_003965793	ENSDART00000018686	rrp15	---NA---	0	NA	NA	M_beryllina_05_2013_comp102993_c0_seq1
M_beryllina_05_2013_comp102998_c0_seq1	CUST_9781_PI429335447	GGCGAGGCACAGTGTGAAGACGACACAGAAAAGTCTAAAAATGACACAAATAAACAGTGA	XP_003451556	ENSDART00000099389	DNLZ	dnl-type zinc finger	GO:0008270	NA	NA	M_beryllina_05_2013_comp102998_c0_seq1
M_beryllina_05_2013_comp103000_c0_seq2	CUST_6883_PI429335447	AAGAGAACAAACCTCTCTGAAGAAATCTCAGAAATCAAGGAAGACTCTCAACCTCAGCCT	XP_003441344	ENSDART00000031153	ccdc174	coiled-coil domain-containing protein 174-like isoform x2	0	NA	NA	M_beryllina_05_2013_comp103000_c0_seq2
M_beryllina_05_2013_comp103007_c0_seq9	CUST_16765_PI429335447	CAATTATGGGATGCCATGTATGTCAATGGGCTTTCTGGTGGATGAAACTGCTCCAATAGT	XP_003451226	ENSDART00000077077	nubpl	iron-sulfur protein nubpl-like	GO:0005524	NA	NA	M_beryllina_05_2013_comp103007_c0_seq9
M_beryllina_05_2013_comp103011_c0_seq2	CUST_2641_PI429335447	AAATTTACAACCCTCCCAGTGGCAAATACAGTGCCTCCATTGGCAATTTTAACTATGAGC	XP_003455472	ENSDART00000152705	api5	apoptosis inhibitor 5	GO:0006810,GO:0008289,GO:0005215	NA	NA	M_beryllina_05_2013_comp103011_c0_seq2
M_beryllina_05_2013_comp103014_c0_seq3	CUST_18850_PI429335447	TGTGAGGAGTTCTGCGCCGAGGACTACTTCACCACCTGCTGTGAAGAAGACATGTGCTAG	XP_003441637	NA	NA	lymphocyte antigen 6d-like	0	NA	NA	M_beryllina_05_2013_comp103014_c0_seq3
M_beryllina_05_2013_comp103020_c1_seq1	CUST_22402_PI429335447	AGTACAAGGACAACATCATCGTGGTGAAGGACGCCACCAACCACCCGATGGCCATCGTCA	XP_004573564	ENSDART00000003550	nmnat2	---NA---	0	NA	NA	M_beryllina_05_2013_comp103020_c1_seq1
M_beryllina_05_2013_comp103023_c0_seq3	CUST_15142_PI429335447	ATCCAGTACGGCAAGAACACCAGCGGCTACCAGAACTACCTGCAGCAGGTCCCCAAGCCC	XP_004556973	ENSDART00000101051	zgc:158856	histone rna hairpin-binding	GO:0003729,GO:0008150,GO:0005575	NA	NA	M_beryllina_05_2013_comp103023_c0_seq3
M_beryllina_05_2013_comp103024_c0_seq1	CUST_16966_PI429335447	TCTGTGGTTTCGGTCATCAGAGGTATCAAAATCCTCCTCACAAACTGGCAGTTTGTGTTG	XP_004069648	ENSDART00000128139	kbtbd4	kelch repeat and btb domain containing 4	GO:0008150,GO:0005575	NA	NA	M_beryllina_05_2013_comp103024_c0_seq1
M_beryllina_05_2013_comp103027_c1_seq1	CUST_30289_PI429335447	AACTTCATCGCTGAGCTTTTCCCTGACAGGTGGTTCGACATCGGGTGCCTGATCCTGGAC	XP_003439664	ENSDART00000065045	prrc1	protein prrc1-like	GO:0001757,GO:0034237,GO:0034199,GO:0010669,GO:0005794	NA	NA	M_beryllina_05_2013_comp103027_c1_seq1
M_beryllina_05_2013_comp103031_c0_seq6	CUST_29917_PI429335447	ACAGACAAGACGGGCCAGATTTCCAACATGTTCGTCCAGTATTTAAATAAGAGTCTTCAT	XP_003440462	ENSDART00000076484	kti12	protein kti12 homolog	GO:0005524	NA	NA	M_beryllina_05_2013_comp103031_c0_seq6
M_beryllina_05_2013_comp103032_c0_seq1	CUST_37945_PI429335447	AGAGAGCTGAAAAGCAGAGGTGTAATCTACAAGTCCAGAGACACAGCTGTGAAGTCATAA	ACQ58567	ENSDART00000048843	supt4h1	transcription elongation factor spt4	GO:0003746,GO:0008270,GO:0032786,GO:0032044,GO:0005840,GO:0006448	NA	NA	M_beryllina_05_2013_comp103032_c0_seq1
M_beryllina_05_2013_comp103035_c0_seq4	CUST_33856_PI429335447	ATCAGAAGCAGAGGATGCATATGAAGATGATGATTTGCGAGACATCAGGGCCTCTATGGA	XP_003439822	ENSDART00000035239	nek1	serine threonine-protein kinase nek1-like	GO:0016301	NA	NA	M_beryllina_05_2013_comp103035_c0_seq4
M_beryllina_05_2013_comp103038_c0_seq5	CUST_29575_PI429335447	CCCTTCGAGAAGGTTAGTCAATCTGCTCAGTCCCGTTTTATTTGTTCTATTTGTGTGAGG	XP_004548788	ENSDART00000100867	fam3c	protein fam3c-like	GO:0007275,GO:0005576	NA	NA	M_beryllina_05_2013_comp103038_c0_seq5
M_beryllina_05_2013_comp103039_c0_seq1	CUST_41302_PI429335447	AGCTGACCATTGTAATTGTGTTGGTGTGTCTGGTTGTCCTTTACATCATCGTCTCTGCAG	ADO28467	ENSDART00000139669	sybl1	vesicle-associated membrane protein 7	GO:0043231,GO:0044444,GO:0016192,GO:0016021	NA	NA	M_beryllina_05_2013_comp103039_c0_seq1
M_beryllina_05_2013_comp103047_c0_seq4	CUST_27607_PI429335447	AGGTCCTTAGAGACAAACATCTCCCCCAGTCCTCCACAAGATGAGCCGCTTTGCGTCTCT	XP_004548510	NA	NA	PREDICTED: uncharacterized protein LOC101478573	0	NA	NA	M_beryllina_05_2013_comp103047_c0_seq4
M_beryllina_05_2013_comp103048_c0_seq1	CUST_4768_PI429335447	AGATGACGAGATGAAGAGAACTATCAACAAAGCCTGGTCAGAGTCCCAAGAGAAGAAGAT	XP_004079291	ENSDART00000098734	cacybp	calcyclin-binding protein	0	NA	NA	M_beryllina_05_2013_comp103048_c0_seq1
M_beryllina_05_2013_comp103051_c0_seq4	CUST_13210_PI429335447	TTCCAACCATCTGAAGGGAGTGAAAACGAGATGGAGACAGAAATTTTGGACTACATGTAA	XP_004538492	ENSDART00000091835	gtf3c5	general transcription factor 3c polypeptide 5-like	0	NA	NA	M_beryllina_05_2013_comp103051_c0_seq4
M_beryllina_05_2013_comp103054_c1_seq1	CUST_18526_PI429335447	ACCAGCTCCTACATGTCGGGAGAGGGCTACCAGAGCCTGCAGTCCATAATGAAGACAGAG	XP_003971565	NA	NA	unnamed protein product	0	NA	NA	M_beryllina_05_2013_comp103054_c1_seq1
M_beryllina_05_2013_comp103060_c0_seq1	CUST_28966_PI429335447	TTGTACAGTGTCTACCCACATGGCTCCTATGATAAACTACCTTTCCTCACCATGGGTTCT	XP_003439692	ENSDART00000099943	PSMB10	proteasome subunit beta type-7 precursor	GO:0005737,GO:0005839,GO:0005634,GO:0004298,GO:0051603	NA	NA	M_beryllina_05_2013_comp103060_c0_seq1
M_beryllina_05_2013_comp103066_c0_seq3	CUST_29806_PI429335447	TATGAGGAGAAACTGATCGTGACAGCCTGGTATAACAAGAGTCTGAGCTTTCAGAAGTTG	XP_003439936	ENSDART00000063052	hook1	protein hook homolog 1-like	GO:0008017,GO:0008333,GO:0045022,GO:0007032,GO:0000226,GO:0007040,GO:0070695,GO:0015031,GO:0005874,GO:0045298	NA	NA	M_beryllina_05_2013_comp103066_c0_seq3
M_beryllina_05_2013_comp103067_c0_seq1	CUST_6688_PI429335447	AATCATCGTGCACCCCAAGTACAACTGGAAGGAGAACCTGAACCGGGACATCGCCCTGCT	ACA30405	ENSDART00000052325	f2	coagulin factor ii	GO:0004252,GO:0007596,GO:0005509,GO:0005576,GO:0006508	NA	NA	M_beryllina_05_2013_comp103067_c0_seq1
M_beryllina_05_2013_comp103069_c0_seq2	CUST_12355_PI429335447	ACTATTACCCCATCATGACGGGGAAGTACGTAGTGAGCATCTGCTGGGGAGGACACGCCA	XP_003448846	ENSDART00000026492	flncb	filamin-c- partial	GO:0003779,GO:0046716	NA	NA	M_beryllina_05_2013_comp103069_c0_seq2
M_beryllina_05_2013_comp103076_c1_seq3	CUST_24319_PI429335447	CCAGGGCCCCCGGATCCACACCCAGGGCCCCCAGAGCCAGAACCAGGGCCCCAGGAACCA	XP_003448837	ENSDART00000122898	PHF21B (2 of 2)	phd finger protein 21b-like	GO:0008270	NA	NA	M_beryllina_05_2013_comp103076_c1_seq3
M_beryllina_05_2013_comp103076_c1_seq4	CUST_24322_PI429335447	AATGTCATCAGAATCAGACGTTGTGCAAAGGGCTGAATGAGATTCAAAACGGACAGCTGG	XP_004564936	ENSDART00000122898	PHF21B (2 of 2)	phd finger protein 21b-like isoform x3	GO:0008270	NA	NA	M_beryllina_05_2013_comp103076_c1_seq4
M_beryllina_05_2013_comp103094_c0_seq2	CUST_1705_PI429335447	CAGAAAAGGTAGCAAAGGCTTTTTGGATGGCCATTGGTGGCGATGAAGATGAGATAGATG	XP_003440500	ENSDART00000060344	aagab	alpha- and gamma-adaptin-binding protein p34-like	GO:0005525,GO:0007264	NA	NA	M_beryllina_05_2013_comp103094_c0_seq2
M_beryllina_05_2013_comp103098_c0_seq1	CUST_15838_PI429335447	AAACAATTTGTTTAAAACACACGCTGTTGACAGGCAGTGGCTGGACCAGAGCAATCGAAG	XP_003445593	ENSDART00000077189	ier5l	immediate early response gene 5-like	GO:0003674,GO:0008150,GO:0005575	NA	NA	M_beryllina_05_2013_comp103098_c0_seq1
M_beryllina_05_2013_comp103101_c0_seq1	CUST_35275_PI429335447	ACAAAACAGAGATCAAACTGGGGGATGGTGATCATCCGCTGAAAGACAACAAAGAAAGCC	XP_004070438	ENSDART00000147087	slc2a5	solute carrier family facilitated glucose transporter member 5-like	GO:0006810,GO:0005215	NA	NA	M_beryllina_05_2013_comp103101_c0_seq1
M_beryllina_05_2013_comp103102_c0_seq3	CUST_424_PI429335447	ATGGTGTTGAGTGCCACTCACAGATACAAAAAGAAGTACGTCACCTCTCTGCTCTACAAG	XP_004542597	ENSDART00000064866	prkab1a	5 -amp-activated protein kinase subunit beta-2-like	GO:0003674,GO:0008150,GO:0005575,GO:0016301,GO:0016310	NA	NA	M_beryllina_05_2013_comp103102_c0_seq3
M_beryllina_05_2013_comp103103_c0_seq2	CUST_8476_PI429335447	TGAGTAACAAAGATGAAATTCCTTACTTGCGGAAAGGCATGTCTGGAAGACCGACCCGTA	XP_004065994	ENSDART00000089025	lap3	cytosol aminopeptidase-like	GO:0005737,GO:0006508,GO:0030145,GO:0008235,GO:0004177	NA	NA	M_beryllina_05_2013_comp103103_c0_seq2
M_beryllina_05_2013_comp103104_c0_seq2	CUST_19510_PI429335447	TTACGTAATGAGCTGCAGAGGAAAGAATCGCTGGTTCAGAAGCATTTGGGAAAGCTGCAT	XP_004065995	ENSDART00000054442	med28	mediator of rna polymerase ii transcription subunit 28-like	GO:0005634,GO:0006355	NA	NA	M_beryllina_05_2013_comp103104_c0_seq2
M_beryllina_05_2013_comp103106_c0_seq4	CUST_32506_PI429335447	AAGACTAAAGCATGGCTGCTGAAATACCTCGACCCTGTGTTTGGTTACCCTCAGTTTGTT	XP_003447926	ENSDART00000045894	rnaseh2a	ribonuclease h2 subunit a-like	GO:0090305,GO:0003723,GO:0004523,GO:0051252	NA	NA	M_beryllina_05_2013_comp103106_c0_seq4
M_beryllina_05_2013_comp103107_c1_seq1	CUST_38461_PI429335447	GGACGAACCCCTAAAGTGGAACAACTCTCCAATATGATTGTCAAATCTTGCAAATGTAGC	XP_004541931	ENSDART00000019766	tgfb3	transforming growth factor beta-3-like	GO:0005615,GO:0060022,GO:0008083,GO:0005160,GO:0016049,GO:0030278,GO:0061035,GO:0007179,GO:0008283	NA	NA	M_beryllina_05_2013_comp103107_c1_seq1
M_beryllina_05_2013_comp103112_c0_seq4	CUST_24028_PI429335447	TCTTAAAGATGTCGTCATCCACGATTGCGGCAAAATTGAGGTGGAGAAACCCTTTGCTGT	XP_003447562	ENSDART00000074814	ppib	peptidyl-prolyl cis-trans isomerase b precursor	GO:0006457,GO:0000413,GO:0003755	NA	NA	M_beryllina_05_2013_comp103112_c0_seq4
M_beryllina_05_2013_comp103114_c0_seq1	CUST_41137_PI429335447	GTCCAGGGATCGGTTTTACTCCGGGACCCCCGAACACAAACTACAACAACATCCAGGTCC	XP_004561143	ENSDART00000067053	vta1	vacuolar protein sorting-associated protein vta1 homolog	GO:0003674,GO:0008150,GO:0005575	NA	NA	M_beryllina_05_2013_comp103114_c0_seq1
M_beryllina_05_2013_comp103116_c0_seq2	CUST_28066_PI429335447	ATATGTTCCATCTCTGAAGACCCTGGAAGAGGAAGTCATGGAGAAACTTGGTATCCAGGA	XP_003452504	ENSDART00000010862	mrpl24	probable 39s ribosomal protein mitochondrial precursor	GO:0005840,GO:0003735,GO:0006412,GO:0005739,GO:0042254	NA	NA	M_beryllina_05_2013_comp103116_c0_seq2
M_beryllina_05_2013_comp103121_c0_seq2	CUST_6793_PI429335447	CAGGAAGTCCCTCTAGGAGATGTGCTGCTGGACCAGCCATCACCTGGGACTCTTGTCTAA	XP_004568208	NA	NA	coiled-coil domain-containing protein 120-like isoform x2	0	NA	NA	M_beryllina_05_2013_comp103121_c0_seq2
M_beryllina_05_2013_comp103123_c0_seq1	CUST_23425_PI429335447	TCATACGGGCCATATCCAAGACGGTGAACTTCGATATTGTGAGGTATCTGTATGACTTCC	XP_004083135	ENSDART00000037670	orc5	origin recognition complex subunit 5-like	GO:0006260,GO:0000808,GO:0005634	NA	NA	M_beryllina_05_2013_comp103123_c0_seq1
M_beryllina_05_2013_comp103124_c0_seq4	CUST_10660_PI429335447	TTTGAAAAACCCACACGCAACTCTGGTATCATGAGTGGGAAGTTCCTGGAAAAGACTCGT	XP_003458299	ENSDART00000023058	efhc1	ef-hand domain-containing protein 1-like	GO:0005509,GO:0008150,GO:0005575	NA	NA	M_beryllina_05_2013_comp103124_c0_seq4
M_beryllina_05_2013_comp103127_c0_seq2	CUST_10141_PI429335447	ACAGTTGGATCGGTAAGAGTCTCTCTTGGTTCTTTGTTACTGAAGCAAATCAAAGCATGA	XP_004545269	ENSDART00000080431	DNAI1 (1 of 2)	dynein intermediate chain axonemal-like	GO:0003674,GO:0008150,GO:0005575	NA	NA	M_beryllina_05_2013_comp103127_c0_seq2
M_beryllina_05_2013_comp103132_c0_seq4	CUST_43006_PI429335447	CAAAACCTTCTCCAGGATGTCTCTTCTACACAAGCATGAGGAATCTGGTTGTTGTGTAGC	XP_003438150	ENSDART00000125935	snai2	zinc finger protein snai2-like	GO:0022408,GO:0003676,GO:0005622,GO:0008078,GO:0008270	NA	NA	M_beryllina_05_2013_comp103132_c0_seq4
M_beryllina_05_2013_comp103133_c0_seq4	CUST_5959_PI429335447	ATCTAGAGAAAAGGAGCTTTTGTCAGTGTCACCAGCACATGCCACGGTCTCTTGTTTCTT	XP_003444324	ENSDART00000128935	cep63	centrosomal protein of 63 kda-like	GO:0005856,GO:0006974,GO:0022402	NA	NA	M_beryllina_05_2013_comp103133_c0_seq4
M_beryllina_05_2013_comp103136_c0_seq1	CUST_6148_PI429335447	ACAGGCGTTTGGAGATACCTCCAAAATGCTTATGAGAGAGAGGAGTTCAAACAGACGTGT	AEH76630	ENSDART00000019396	clic2	chloride intracellular channel protein 2	GO:0016020,GO:0005247,GO:0006821	NA	NA	M_beryllina_05_2013_comp103136_c0_seq1
M_beryllina_05_2013_comp103137_c0_seq2	CUST_39358_PI429335447	GTTTGGTGTACACCATAACAGATGTGGAGGAAGTCCACATCTGGATGGTTAAGCACTTCA	XP_004545047	ENSDART00000109091	mettl1	trna (guanine-n -)-methyltransferase b-like	GO:0006400,GO:0036265,GO:0008176,GO:0005634,GO:0000049	NA	NA	M_beryllina_05_2013_comp103137_c0_seq2
M_beryllina_05_2013_comp103138_c0_seq1	CUST_5716_PI429335447	AGAAGTTAAAGTCAAAGATGTCACTCCTCCAAAGTCCCCGTCCATCAGAAAGGAGATGAC	XP_004084021	ENSDART00000019759	aven	cell death regulator aven-like	GO:0003674	NA	NA	M_beryllina_05_2013_comp103138_c0_seq1
M_beryllina_05_2013_comp103139_c0_seq2	CUST_12136_PI429335447	TCTCTCTAAGAGCGAGCTGAGTATTGGTGAGGAGATCGAGGAGGTTTCCATCGAGGGGCC	XP_003446747	ENSDART00000153066	fgfr1op	fgfr1 oncogene partner-like	GO:0005815,GO:0034453,GO:0005509	NA	NA	M_beryllina_05_2013_comp103139_c0_seq2
M_beryllina_05_2013_comp103140_c0_seq4	CUST_25156_PI429335447	GCCTTCGACTGCCCCAGCATCCAGATCACCTCCATCGCCCACCTGGGTCAGCCGGAGCTG	CAG11664	ENSDART00000077495	polr2a	polr2a protein	GO:0016779,GO:0006366,GO:0016740,GO:0005665,GO:0006351,GO:0003899,GO:0003677	NA	NA	M_beryllina_05_2013_comp103140_c0_seq4
M_beryllina_05_2013_comp103150_c0_seq1	CUST_38980_PI429335447	AGTAAAAGGACACAAGTTCTACTTTCTACTGGACAAAGAGGGGACAGTGAACAATGCCCG	XP_003445357	ENSDART00000101201	tmem223	transmembrane protein 223-like	GO:0016020	NA	NA	M_beryllina_05_2013_comp103150_c0_seq1
M_beryllina_05_2013_comp103153_c0_seq1	CUST_16681_PI429335447	TGCAACCTGGACTCTTTGCCTTTAGAATCAATGCCTTTGACGGCAGAATCAGAAATATGA	XP_004071694	ENSDART00000022533	kcnj2	inward rectifier potassium channel 2-like	GO:0034765,GO:0005242,GO:0006813,GO:0008076	NA	NA	M_beryllina_05_2013_comp103153_c0_seq1
M_beryllina_05_2013_comp103155_c0_seq2	CUST_9856_PI429335447	TGTGTCTGCTGTGGAGGTGTGAATCCTGCTGCTGTCCCCCGATGCCTCACCTGTGAGAGC	XP_004574099	ENSDART00000078173	dzank1	double zinc ribbon and ankyrin repeat-containing protein 1-like	GO:0008150,GO:0008270,GO:0005622	NA	NA	M_beryllina_05_2013_comp103155_c0_seq2
M_beryllina_05_2013_comp103161_c0_seq1	CUST_26488_PI429335447	TGGACACAGTAGATAAAAATGGAGATGACGAAATACTGGATTGGGAGCTGGACGAACTCC	XP_003459540	ENSDART00000043609	C24H11orf65	PREDICTED: uncharacterized protein C11orf65-like	0	NA	NA	M_beryllina_05_2013_comp103161_c0_seq1
M_beryllina_05_2013_comp103161_c0_seq3	CUST_26485_PI429335447	TATTTGCAGGAGTGGAAACATCTGGCCTGCAGTCACTCATCTGAGCTTAGCAAAGATTCT	XP_004569592	ENSDART00000043609	C24H11orf65	PREDICTED: uncharacterized protein C11orf65 homolog isoform X1	0	NA	NA	M_beryllina_05_2013_comp103161_c0_seq3
M_beryllina_05_2013_comp103167_c0_seq1	CUST_3331_PI429335447	AAGACGGAAAGAGAAAAAATCGAAAAGGCAGACAAACTCCTGGACAAGACTCAGTCCACG	XP_004078256	ENSDART00000133886	atn1	atrophin-1-like isoform x4	0	NA	NA	M_beryllina_05_2013_comp103167_c0_seq1
M_beryllina_05_2013_comp103170_c0_seq2	CUST_24034_PI429335447	CCTATGACAGCAGAAAACTTCAGATGCTTGTGCACTCATGAGAAGGGATTTGGCTACAAG	ACQ58423	ENSDART00000061958	ppiab	peptidyl-prolyl cis-trans isomerase e	GO:0006457,GO:0000413,GO:0003723,GO:0003755,GO:0000166	NA	NA	M_beryllina_05_2013_comp103170_c0_seq2
M_beryllina_05_2013_comp103171_c0_seq1	CUST_23440_PI429335447	ATTAGAGCTTTCCTGAAAAAGTGCTGGAGTGTGGACATCAGCACAAAGGAGTACGCGTAT	ADR80691	ENSDART00000128468	nr0b1	orphan nuclear receptor dax-1	GO:0043401,GO:0006355,GO:0003677,GO:0003700,GO:0003707,GO:0030104,GO:0005667,GO:0045449	NA	NA	M_beryllina_05_2013_comp103171_c0_seq1
M_beryllina_05_2013_comp103173_c0_seq1	CUST_23182_PI429335447	ACGCCCAGGAAGGACGACAGCTTCGTTTCCAAAGCGATGGAGTACATGTTCGGCTGGTGA	XP_004081649	ENSDART00000032344	nup35	nucleoporin nup53	GO:0031965,GO:0055085,GO:0033036,GO:0071702	NA	NA	M_beryllina_05_2013_comp103173_c0_seq1
M_beryllina_05_2013_comp103174_c0_seq5	CUST_25711_PI429335447	ATAACTATATTACTCGTGACTTACACCATGAAAATGAGTTCCAGCCCCGCAGCGCTGTGA	XP_001344619	ENSDART00000051297	tmem174	PREDICTED: hypothetical protein LOC100005615	0	NA	NA	M_beryllina_05_2013_comp103174_c0_seq5
M_beryllina_05_2013_comp103178_c0_seq1	CUST_15583_PI429335447	ATGAATGACTCTGTAAAGACTTCAATGCACTGGGCTGTCCGAACCAAGAAAGAGCCAATG	XP_004559707	ENSDART00000127610	dnajc12	homolog subfamily c member 12	GO:0003676,GO:0000166	NA	NA	M_beryllina_05_2013_comp103178_c0_seq1
M_beryllina_05_2013_comp103180_c0_seq1	CUST_32158_PI429335447	CATTTCATACCAGACAGGATCTGCAAGTTGAATGTAAAGACAAAGGAGACCTGGGTATGG	XP_003975314	ENSDART00000004533	rpe65a	retinoid isomerohydrolase-like	GO:0046872,GO:0005737,GO:0050896,GO:0007601,GO:0052885,GO:0005886,GO:0052884	NA	NA	M_beryllina_05_2013_comp103180_c0_seq1
M_beryllina_05_2013_comp103183_c0_seq1	CUST_7171_PI429335447	TTTGGTGAAGAGCTCAATCAGATGCTGTTGCAGCTCCACCTGCAGCACCACCCCCAGATC	XP_004565014	ENSDART00000012212	commd2	comm domain-containing protein 2	GO:0003674,GO:0008150,GO:0005575	NA	NA	M_beryllina_05_2013_comp103183_c0_seq1
M_beryllina_05_2013_comp103185_c0_seq1	CUST_16363_PI429335447	TGTGACTGACCACATAAGCACCTCAGAGGACTACCAGAGAGCCATCACACACCACCACAG	XP_004068169	ENSDART00000138492	irf4b	interferon regulatory factor 4-like	GO:0003700,GO:0000975,GO:0006355,GO:0005667,GO:0045449	NA	NA	M_beryllina_05_2013_comp103185_c0_seq1
M_beryllina_05_2013_comp103186_c0_seq1	CUST_17968_PI429335447	CACGAACCTTTGTTAGTCCGGGCAAGCTCAAAAGACAATGTACAAGAGACCCAAATCTAG	XP_003440526	ENSDART00000021605	LRRC4C	leucine-rich repeat-containing protein 4c-like	GO:0050770,GO:0005515,GO:0016021	NA	NA	M_beryllina_05_2013_comp103186_c0_seq1
M_beryllina_05_2013_comp103188_c0_seq2	CUST_10258_PI429335447	AGTCGTTTCTTCTCCTGCCTGGAGGCCGACGGAACCAAGAACTTCTTCCAGTTCAGCTCC	XP_004079877	NA	NA	e3 ubiquitin-protein ligase ccnb1ip1-like	0	NA	NA	M_beryllina_05_2013_comp103188_c0_seq2
M_beryllina_05_2013_comp103189_c1_seq4	CUST_39964_PI429335447	AGGCCCTCTTTTAAAAGACTTCGCACTGAGCTGAGCGTCATACACAACAAAATTATATGA	XP_003442380	ENSDART00000149938	fes	tyrosine-protein kinase transforming protein fps-like	GO:0018108,GO:0009611,GO:0005524,GO:0004713,GO:0090022	NA	NA	M_beryllina_05_2013_comp103189_c1_seq4
M_beryllina_05_2013_comp103190_c0_seq1	CUST_26935_PI429335447	TGGCTGAAACGTGTGACTGCCGCCTGCCAAACTTCAGCTTGTTCCTGCCAAACTCCTGCT	XP_004071193	NA	NA	PREDICTED: uncharacterized protein LOC101163171	0	NA	NA	M_beryllina_05_2013_comp103190_c0_seq1
M_beryllina_05_2013_comp103193_c0_seq1	CUST_38752_PI429335447	CCTGCCTTTGTGGAGGTTCTTCTGTTTATAGCAGTTTTCGGACTGAAGAAGAAGCCATTA	XP_003450934	ENSDART00000127072	tmem107l	transmembrane protein 107	GO:0016021,GO:0030030,GO:0007275	NA	NA	M_beryllina_05_2013_comp103193_c0_seq1
M_beryllina_05_2013_comp103194_c0_seq1	CUST_14128_PI429335447	AGAATAACTATTCCCGTCATATTGGCTGGGGTCCTCTGCATCACTGCAGACACCAAAAAA	XP_004551534	ENSDART00000024960	grem2	gremlin-2 precursor	GO:0005576,GO:0003674,GO:0008150	NA	NA	M_beryllina_05_2013_comp103194_c0_seq1
M_beryllina_05_2013_comp103195_c0_seq2	CUST_28792_PI429335447	TCGTCACTAAGAACCTTTTCCTGAAGGACAAGAAGAAGAAAACGCACTTCCTGCTGACAG	XP_003459204	NA	NA	prolyl-trna synthetase associated domain-containing protein 1-like	GO:0002161,GO:0006450	NA	NA	M_beryllina_05_2013_comp103195_c0_seq2
M_beryllina_05_2013_comp103196_c0_seq1	CUST_31372_PI429335447	TGACACACCCCATCTTCCTGACGGCCGACAGGCTCCAGCAGGTCCTGCTGCAGCAATTCA	CAF90477	ENSDART00000114723	RAPGEFL1	rap guanine nucleotide exchange factor-like 1-like	0	NA	NA	M_beryllina_05_2013_comp103196_c0_seq1
M_beryllina_05_2013_comp103204_c0_seq2	CUST_23602_PI429335447	TGAACATGTGCATCCATCCCATCCTCTACATGGCTGTTCTTGACAGTATACAGGTACCAT	XP_004071658	ENSDART00000008240	P2RY11	p2y purinoceptor 11	GO:0004930,GO:0007186,GO:0016020	NA	NA	M_beryllina_05_2013_comp103204_c0_seq2
M_beryllina_05_2013_comp103208_c0_seq6	CUST_24688_PI429335447	TGCTGAGTCGGAGTGTGGGCTGGACCACGGCGTGCAGTTCGATTGGACGATCACCAACCA	XP_004086743	ENSDART00000104258	pmvk	phosphomevalonate kinase-like	GO:0005737,GO:0004631,GO:0006695	NA	NA	M_beryllina_05_2013_comp103208_c0_seq6
M_beryllina_05_2013_comp103210_c0_seq4	CUST_38827_PI429335447	TACATCCAGATGAGCTTTGACTCTAACATCAGTTTGGTGCATTATATTGCCATGGCGGCC	XP_003965979	ENSDART00000058383	tmem147	transmembrane protein 147	GO:0016021	NA	NA	M_beryllina_05_2013_comp103210_c0_seq4
M_beryllina_05_2013_comp103214_c0_seq2	CUST_32500_PI429335447	TGTACTACCCCATGATGAGGCCGCTGATCGAGAAATTTTCTGCCAATGTGCCGCGCTCGC	CAF93935	ENSDART00000109826	dicer1	---NA---	0	NA	NA	M_beryllina_05_2013_comp103214_c0_seq2
M_beryllina_05_2013_comp103219_c0_seq1	CUST_37927_PI429335447	AGAATTCAGGTTAAGGACAGCAAAATGTCAGTCAACCAGCTGGTGTCGAAATACAAAAAA	XP_004555362	ENSDART00000091497	tceanc2	transcription elongation factor a n-terminal and central domain-containing protein 2-like	GO:0006351,GO:0003677,GO:0005634	NA	NA	M_beryllina_05_2013_comp103219_c0_seq1
M_beryllina_05_2013_comp103220_c0_seq6	CUST_33241_PI429335447	TAAAAAGAGAGGCAACTGTTCAACTTGTGGTGAAAAGATGCTCAATCATGCCACTGAGGC	XP_004071067	ENSDART00000113179	sas	sarcoma amplified sequence	GO:0016021	NA	NA	M_beryllina_05_2013_comp103220_c0_seq6
M_beryllina_05_2013_comp103223_c0_seq1	CUST_4801_PI429335447	GATGATTCTGGTGAAATAGAGCTGAACTTTTTGGAGTGGATAAATCTGGCGATGCTGTAG	CAG09505	ENSDART00000083351	capn2l	calpain (m ii) large like	GO:0005622,GO:0006508,GO:0004198,GO:0005509	NA	NA	M_beryllina_05_2013_comp103223_c0_seq1
M_beryllina_05_2013_comp103225_c0_seq1	CUST_7432_PI429335447	TGGGTTGATGTCTCAAGTCATCAAGGACAAACTCTTCAATCAAATAAACACATCTGCCAA	XP_004081080	ENSDART00000080332	cops5	cop9 signalosome complex subunit 5	GO:0046872,GO:0006508,GO:0008180,GO:0008237,GO:0048471	NA	NA	M_beryllina_05_2013_comp103225_c0_seq1
M_beryllina_05_2013_comp103227_c0_seq6	CUST_6727_PI429335447	TCTTCGTGCCCTGGTGTAAGAAGTCTGACGTGGTGTTCAGGCGCTCCGGATTCTGCAAAG	XP_003456321	ENSDART00000078576	coq10b	coenzyme q-binding protein coq10 homolog mitochondrial-like	GO:0005743	NA	NA	M_beryllina_05_2013_comp103227_c0_seq6
M_beryllina_05_2013_comp103228_c1_seq12	CUST_39580_PI429335447	TCTGTGCCTGAGCTGACCCAGCAGATGTTTGATGCCAAGAACATGATGGCAGCCTGCGAC	XP_003450025	ENSDART00000131187	TUBB8P7 (3 of 3)	tubulin beta-1 chain-like	GO:0005874,GO:0051258,GO:0006184,GO:0007017,GO:0003924,GO:0005200,GO:0005737,GO:0005525	NA	NA	M_beryllina_05_2013_comp103228_c1_seq12
M_beryllina_05_2013_comp103228_c1_seq7	CUST_39574_PI429335447	AGAACACAGACGAGACCTACTGCATCGACAACGAGGCGCTCTACGACATCTGCTTCCGCA	ACN49165	ENSDART00000131187	TUBB8P7 (3 of 3)	tubulin beta chain-like	GO:0005874,GO:0051258,GO:0006184,GO:0007017,GO:0003924,GO:0005200,GO:0005737,GO:0005525	NA	NA	M_beryllina_05_2013_comp103228_c1_seq7
M_beryllina_05_2013_comp103231_c0_seq2	CUST_8449_PI429335447	TTTACAAAGAAGGTCCAGATCGACCCCTATTTGGAGGACTCGATGTGTCAAGTTTGCCTT	XP_004558078	ENSDART00000127007	cpeb1b	cytoplasmic polyadenylation element-binding protein 1-like	GO:0005737,GO:0003723,GO:0006397,GO:0006417,GO:0000166	NA	NA	M_beryllina_05_2013_comp103231_c0_seq2
M_beryllina_05_2013_comp103233_c0_seq6	CUST_14110_PI429335447	TTCAGAAAGGAGACGTTATCAAGGTGACAGAAATGGAGGAGGATTCTTGCTGGTTCACAG	XP_003456002	ENSDART00000055171	grapa	grb2-related adapter	GO:0005575	NA	NA	M_beryllina_05_2013_comp103233_c0_seq6
M_beryllina_05_2013_comp103237_c0_seq1	CUST_26647_PI429335447	TGCATCAGGGCCGAGTTCTACATGAAGAACGGCATCATCTGGAGCGTGGAGGAGGGATAC	XP_003443825	ENSDART00000109913	C19H5orf49	PREDICTED: uncharacterized protein C5orf49 homolog	0	NA	NA	M_beryllina_05_2013_comp103237_c0_seq1
M_beryllina_05_2013_comp103238_c0_seq2	CUST_14227_PI429335447	AAGGATGATAGATGATGCGAAATTATATGGGATCCAGGGCTTCTGCAAGGACCTGTTGGA	XP_004567118	ENSDART00000016803	grpel1	grpe protein homolog mitochondrial-like	GO:0006457,GO:0051087,GO:0005759,GO:0000774,GO:0042803	NA	NA	M_beryllina_05_2013_comp103238_c0_seq2
M_beryllina_05_2013_comp103242_c0_seq8	CUST_13615_PI429335447	TTAGCTCAGATAACTGGTGCCAGAACAGTGCCAAGAGTTTTCATCAATGGGAACTGCATC	XP_004567434	ENSDART00000062537	glrx2	glutaredoxin- mitochondrial-like	GO:0007417,GO:0009055,GO:0045454,GO:0005829,GO:0015035,GO:0055114,GO:0006118	NA	NA	M_beryllina_05_2013_comp103242_c0_seq8
M_beryllina_05_2013_comp103246_c0_seq4	CUST_1702_PI429335447	TCCACAATGAAGATCAAGATCATTGCTCCACCAGAGCGTAAATACTCTGTCTGGATCGGA	BAA90689	ENSDART00000114549	NA	alpha actin	GO:0005856,GO:0005737,GO:0005524	NA	NA	M_beryllina_05_2013_comp103246_c0_seq4
M_beryllina_05_2013_comp103246_c0_seq9	CUST_25765_PI429335447	AGCTCATTGTAGAAGGTGTGATGCCAGATCTTCTCCATGTCATCCCAGTTGGTCACAATA	XP_002660394	ENSDART00000141737	actb2	PREDICTED: hypothetical protein LOC100334172	0	NA	NA	M_beryllina_05_2013_comp103246_c0_seq9
M_beryllina_05_2013_comp103249_c0_seq1	CUST_40111_PI429335447	AGTCAAAATGCAAGTGTTGAAGGACCGAGGCCTTTCCATACCCAAAGCTGACAACTTAGA	XP_003445576	ENSDART00000063392	lsm1	u6 snrna-associated sm-like protein lsm1	GO:0003674	NA	NA	M_beryllina_05_2013_comp103249_c0_seq1
M_beryllina_05_2013_comp103255_c0_seq2	CUST_18847_PI429335447	TTATACTTCAGTAAAAGAAATTCATCAGGTTTTTGTCCAAGAACAGGTTCCCCCGCCCAG	XP_003447654	NA	NA	lymphocyte antigen 108 isoform s	0	NA	NA	M_beryllina_05_2013_comp103255_c0_seq2
M_beryllina_05_2013_comp103256_c0_seq4	CUST_32677_PI429335447	GAAAAACAGATTCAACAGATGTCAGACAACATCGCAGCAGACATCGACAAACAGCTTGCA	XP_003444381	ENSDART00000039536	mrrf	ribosome-recycling mitochondrial-like	GO:0006412,GO:0005739	NA	NA	M_beryllina_05_2013_comp103256_c0_seq4
M_beryllina_05_2013_comp103260_c0_seq1	CUST_22711_PI429335447	AGGCGCCGCCGCAACGCGCTGCCCAACATCATGATCCACGCCGGGGGGACGCGCTCGTGA	XP_003454928	ENSDART00000113475	si:dkey-91i10.2	novel protein with domain	0	NA	NA	M_beryllina_05_2013_comp103260_c0_seq1
M_beryllina_05_2013_comp103264_c1_seq1	CUST_2653_PI429335447	AACTTGCTTTTTAACGGTGCCAAAGCTGTAATGGGCAAAATATGGACCGGAGAGGAGAAG	XP_004540844	ENSDART00000129086	siva1	apoptosis regulatory protein siva	0	NA	NA	M_beryllina_05_2013_comp103264_c1_seq1
M_beryllina_05_2013_comp103275_c0_seq2	CUST_4246_PI429335447	ACAAAATTTCCAGAATCCCGAATTGGTCGTCTCTTTGATGGCACAGAGCCTATAGTCCTG	XP_003437943	ENSDART00000111063	kctd1	btb poz domain-containing protein kctd1-like	GO:0090090,GO:0044335,GO:0051260,GO:0060037	NA	NA	M_beryllina_05_2013_comp103275_c0_seq2
M_beryllina_05_2013_comp103276_c0_seq1	CUST_313_PI429335447	TATGGCAAAGAGTCTCAGGCCAAGGATGTGATTGAGGAATACTTCAAAGCCAAGAAATGA	ACN09848	ENSDART00000053542	rps12	40s ribosomal protein s12	GO:0005840,GO:0003735,GO:0006412,GO:0042254	NA	NA	M_beryllina_05_2013_comp103276_c0_seq1
M_beryllina_05_2013_comp103277_c0_seq2	CUST_28642_PI429335447	TTCAAAGACGGAAAGGCAATAAACGTCTTCATCAGTGCAAACCGACTCATCCACCAAACC	XP_003442960	ENSDART00000019063	pdcd10b	programmed cell death protein 10	GO:0009790,GO:0000139,GO:0001525,GO:0005886,GO:0003007,GO:0006915	NA	NA	M_beryllina_05_2013_comp103277_c0_seq2
M_beryllina_05_2013_comp103279_c0_seq1	CUST_17104_PI429335447	AGTGTCACTGTGGCTAACGATGGGAGATTTTTGATGTTTGGATGCAACAACACAGTGGTG	XP_004067312	ENSDART00000127022	CU462878.1	keratinocyte-associated protein 3-like	GO:0003674,GO:0008150,GO:0005575	NA	NA	M_beryllina_05_2013_comp103279_c0_seq1
M_beryllina_05_2013_comp103281_c1_seq1	CUST_17926_PI429335447	AACGAGCCAGGTCCCCAGTCGAGAGCTGACAGGAGTTTAAAAGGCACGATCACTGTTTAA	XP_003976144	ENSDART00000123693	LRRC52 (1 of 2)	leucine-rich repeat-containing protein 38-like	0	NA	NA	M_beryllina_05_2013_comp103281_c1_seq1
M_beryllina_05_2013_comp103289_c0_seq3	CUST_4960_PI429335447	AGTGGTTATGGCCAAAACCAATTCAGCACATCTCGGGACTATTCCAACAATAGCTACCAG	XP_003442433	ENSDART00000101018	caprin1a	caprin-1-like	GO:0003674,GO:0008150,GO:0005575	NA	NA	M_beryllina_05_2013_comp103289_c0_seq3
M_beryllina_05_2013_comp103300_c1_seq5	CUST_33193_PI429335447	TGAGCTACAGCCACTCCACCAACAAGTACGAGGTGGACGACATCGACGAGGAGGGAAAAG	ADO29122	ENSDART00000007726	ccdc101	saga-associated factor 29 homolog	0	NA	NA	M_beryllina_05_2013_comp103300_c1_seq5
M_beryllina_05_2013_comp103307_c0_seq1	CUST_41569_PI429335447	TTCCTGATCTACAAGTTTAAGAGGAAAATCCCCTGGATCAACATCTACGCGGAGGTGAAC	XP_004539362	ENSDART00000110573	CABZ01076351.1	vps10 domain-containing receptor 3-like	0	NA	NA	M_beryllina_05_2013_comp103307_c0_seq1
M_beryllina_05_2013_comp103308_c0_seq13	CUST_43048_PI429335447	TCATACATTGTTGATGGACAACGAGTCATTCCACTGAAACACAGTGTTTTGTCAAACTGA	XP_003200998	ENSDART00000077596	BX511172.1	zinc finger protein zxdc	GO:0003676,GO:0008270,GO:0005622	NA	NA	M_beryllina_05_2013_comp103308_c0_seq13
M_beryllina_05_2013_comp103309_c0_seq1	CUST_36856_PI429335447	TCGACGACATCGTCTCTGGCCACAAGAAGAAGGACAAAGATCAGCAGATGGGAGGTCAGG	XP_003459703	ENSDART00000003752	cct3	t-complex protein 1 subunit gamma	GO:0046671,GO:0006457,GO:0048048,GO:0005524,GO:0051082,GO:0005737	NA	NA	M_beryllina_05_2013_comp103309_c0_seq1
M_beryllina_05_2013_comp103311_c0_seq2	CUST_27532_PI429335447	AGTGAACTAAATAAACCTGCAGAAAAAGGTAGGACAGCTTTTATGCTTGGTGGAACCGAT	XP_004555464	NA	NA	PREDICTED: uncharacterized protein LOC101475273 isoform X1	0	NA	NA	M_beryllina_05_2013_comp103311_c0_seq2
M_beryllina_05_2013_comp103314_c0_seq1	CUST_685_PI429335447	ATTTACGTGTTGGATTTCTTCTGGAATGAGGCGTGGTACCTGAAGACCATCGATATCTGC	XP_004067532	ENSDART00000008033	dhcr7	7-dehydrocholesterol reductase-like	GO:0005789,GO:0006695,GO:0047598,GO:0016021,GO:0055114	NA	NA	M_beryllina_05_2013_comp103314_c0_seq1
M_beryllina_05_2013_comp103317_c0_seq5	CUST_13411_PI429335447	AATGGTCCAAAACCTCATGGTGCTAAGGTTTGGTAATCGCATTTTTGGACCTACGTGGAA	XP_003448206	ENSDART00000104834	g6pd	glucose-6-phosphate 1-dehydrogenase	GO:0050661,GO:0004345,GO:0006098,GO:0006749	NA	NA	M_beryllina_05_2013_comp103317_c0_seq5
M_beryllina_05_2013_comp103324_c0_seq4	CUST_36544_PI429335447	TGTTTATGTGATAAGTGGAGTGAAGTCAGTAAGCCATGACCTGGAGCAGCTCAACAGACT	XP_004574368	ENSDART00000113120	taf6l	taf6-like rna polymerase ii p300 cbp-associated factor-associated factor 65 kda subunit 6l-like	GO:0006352,GO:0051090,GO:0005634,GO:0046982	NA	NA	M_beryllina_05_2013_comp103324_c0_seq4
M_beryllina_05_2013_comp103326_c0_seq1	CUST_17281_PI429335447	TTCACAGTCATTAGTGAAAGAGACCAGTGGCAGATTAGCTGAAGAGGCAGGATTCCAAGA	XP_004559636	ENSDART00000125136	DSN1	kinetochore-associated protein dsn1 homolog	0	NA	NA	M_beryllina_05_2013_comp103326_c0_seq1
M_beryllina_05_2013_comp103329_c0_seq1	CUST_12874_PI429335447	TGTTTATTTTGCTGACGATGATAACACGTACAGCCTGCAGCTCTTTGAAGAGATGCGGAG	XP_004554387	ENSDART00000149966	b3gat3	galactosylgalactosylxylosylprotein 3-beta-glucuronosyltransferase 3-like	GO:0015018,GO:0015012,GO:0016020,GO:0030198,GO:0051216,GO:0030206	NA	NA	M_beryllina_05_2013_comp103329_c0_seq1
M_beryllina_05_2013_comp103337_c0_seq17	CUST_13381_PI429335447	AGATTGTTGCAACTGCCACACTGATCACCGAACACAAATTCATCCACTCCTGTGCAAAGA	XP_003437545	ENSDART00000138831	gnpnat1	glucosamine 6-phosphate n-acetyltransferase	GO:0004343,GO:0006040,GO:0042967	NA	NA	M_beryllina_05_2013_comp103337_c0_seq17
M_beryllina_05_2013_comp103341_c0_seq2	CUST_1672_PI429335447	ATGGGTTTGAATTTCGCTACGACAACAACAATGTGGATAAGGACAAGCCTCTAGCAGCTG	XP_003441689	ENSDART00000084715	alkbh8	alkylated dna repair protein alkb homolog 8-like	GO:0003676,GO:0016706,GO:0032259,GO:0055114,GO:0000166,GO:0008168	NA	NA	M_beryllina_05_2013_comp103341_c0_seq2
M_beryllina_05_2013_comp103342_c0_seq2	CUST_22006_PI429335447	TCTATTCAAAACAGAGCTTGTCTGGGCCAATGTTTCAGTTACAGCGTCCCCAACACATTC	XP_003441479	ENSDART00000045844	NBL1	neuroblastoma suppressor of tumorigenicity 1-like	GO:0005576,GO:0060876	NA	NA	M_beryllina_05_2013_comp103342_c0_seq2
M_beryllina_05_2013_comp103343_c0_seq2	CUST_17335_PI429335447	ACCATCAATCATCATGATACCAAAGGAGTACGAGTGTAACAACCCCTCGGTAATAGTCCG	XP_003978132	ENSDART00000014916	klf3	krueppel-like factor 3-like	GO:0008270,GO:0003676,GO:0005622	NA	NA	M_beryllina_05_2013_comp103343_c0_seq2
M_beryllina_05_2013_comp103344_c0_seq6	CUST_1399_PI429335447	TAATCTATGTGATTGACAGCTCAGACAGGAAAAGGTTTGAGGAGACAAGCTTGGAGCTCG	XP_004074809	ENSDART00000105545	arl3	adp-ribosylation factor-like protein 3-like	GO:0060271,GO:0008017,GO:0000910,GO:0007264,GO:0030496,GO:0000139,GO:0005876,GO:0005813,GO:0019003,GO:0005881,GO:0032391,GO:0003924,GO:0015031,GO:0005634,GO:0005525,GO:0045298	NA	NA	M_beryllina_05_2013_comp103344_c0_seq6
M_beryllina_05_2013_comp103345_c1_seq2	CUST_37414_PI429335447	GTCTTCTCGCAAGAGTTGGTTTTCTTCTCCGATCTCAAGTATGAGTGCAGAGATAACTGA	XP_004556065	ENSDART00000142392	thbs2a	thrombospondin-2-like isoform x2	GO:0005576,GO:0007155,GO:0005509	NA	NA	M_beryllina_05_2013_comp103345_c1_seq2
M_beryllina_05_2013_comp103346_c0_seq2	CUST_12673_PI429335447	ACATGTTCGTTTCGGTGGGATACATCGTCCGGCTGATAGCCGGACACGAGAAAGTGGCGT	CBN81757	ENSDART00000066835	fzd8a	frizzled homolog 8a	GO:0016021,GO:0021529,GO:0004930,GO:0021879,GO:0017147,GO:0060070,GO:0030165,GO:0042995,GO:0033077,GO:0060898,GO:0042813,GO:0001944,GO:0007409,GO:0007186,GO:0021531,GO:0008406,GO:0005737,GO:0005886	NA	NA	M_beryllina_05_2013_comp103346_c0_seq2
M_beryllina_05_2013_comp103347_c0_seq2	CUST_29896_PI429335447	GAGTTCGAGGGTTTTGAATACATCAACCCCCTGCTGCTGTCCAATGAGGAGTCAGTATGA	XP_004545999	ENSDART00000063592	prkcz	protein kinase c iota type-like	GO:0007097,GO:0045199,GO:0001841,GO:0008270,GO:0021744,GO:0031226,GO:0034334,GO:0042476,GO:0000132,GO:0007405,GO:0005543,GO:0035050,GO:0005915,GO:0005829,GO:0045217,GO:0007502,GO:0006468,GO:0016332,GO:0060042,GO:0048546,GO:0008078,GO:0001738,GO:0005634,GO:0005524,GO:0004697,GO:0035556,GO:0009069	NA	NA	M_beryllina_05_2013_comp103347_c0_seq2
M_beryllina_05_2013_comp103348_c0_seq1	CUST_10222_PI429335447	ATCCAAGTTGTTCTTAGAATCTGTTACACGGACTCCATCGGTGTTCAGGAGGACCAGTAT	XP_003451357	ENSDART00000105520	pias4a	e3 sumo-protein ligase pias1-like	GO:0008270,GO:0003676,GO:0032480,GO:0060339,GO:0019789,GO:0005634	NA	NA	M_beryllina_05_2013_comp103348_c0_seq1
M_beryllina_05_2013_comp103350_c0_seq2	CUST_38242_PI429335447	ACAAAATTCACCGCAGCAAGAATCGCTGGAAGTTTCATCTGAAAGATGGGGTGATGTGCT	XP_004556089	ENSDART00000093222	STON1	transcription initiation factor iia subunit 1-like	GO:0006367,GO:0005672,GO:0030131,GO:0006897,GO:0006886	NA	NA	M_beryllina_05_2013_comp103350_c0_seq2
M_beryllina_05_2013_comp103354_c1_seq2	CUST_30370_PI429335447	TTACTACCTACATTTCAGACTTCATTTCAGCACCTACAGACCATGTTGTCAGAGGCAGAT	XP_003443978	ENSDART00000006579	saal1	protein saal1-like	GO:0005576,GO:0006953	NA	NA	M_beryllina_05_2013_comp103354_c1_seq2
M_beryllina_05_2013_comp103358_c0_seq1	CUST_31723_PI429335447	AAATGGTCATCTTGCCGTATGCACATTTTTGCTTGATAAGGGAGCGTGTGCATCACCTCA	XP_003445692	ENSDART00000060610	ankrd39	receptor-interacting serine-threonine kinase partial	0	NA	NA	M_beryllina_05_2013_comp103358_c0_seq1
M_beryllina_05_2013_comp103362_c0_seq1	CUST_29737_PI429335447	ATCACCAACAAGTTCAGCAACACCTGCCTGATGATCGCCGCCTACAAGGGCCACGCCGCC	XP_003439419	ENSDART00000090803	fem1b	protein fem-1 homolog b-like	GO:0005737,GO:0051438,GO:0004842	NA	NA	M_beryllina_05_2013_comp103362_c0_seq1
M_beryllina_05_2013_comp103364_c0_seq1	CUST_11020_PI429335447	ATGGACGTGGCTGCTTCCGAGTTCTTCCGGAGTGGAAAGTACGACCTGGACTTCAAGTCC	XP_003451163	ENSDART00000145905	eno3	enolase 3-2	GO:0000015,GO:0004634,GO:0000287,GO:0006096,GO:0000162,GO:0006094,GO:0006571,GO:0009094	NA	NA	M_beryllina_05_2013_comp103364_c0_seq1
M_beryllina_05_2013_comp103366_c0_seq2	CUST_33100_PI429335447	TGAGATCAAAGAATGTCTGGTCAAGAAGAGGAAATGTCCAGGAGCACAGAGAAACCCTGA	XP_003966018	ENSDART00000058578	rspo3	r-spondin-3 precursor	GO:0005576,GO:0009055,GO:0008201,GO:0051536,GO:0016055,GO:0006118	NA	NA	M_beryllina_05_2013_comp103366_c0_seq2
M_beryllina_05_2013_comp103368_c0_seq2	CUST_32530_PI429335447	ACGGCAACCTGTGGGACGAGCCCCGGGGGAACAGGCCCCAGGCCAAGAGGAAGAGAGGGG	XP_003451267	ENSDART00000102662	rpp25l	ribonuclease p protein subunit p25-like	GO:0003676	NA	NA	M_beryllina_05_2013_comp103368_c0_seq2
M_beryllina_05_2013_comp103369_c0_seq1	CUST_7738_PI429335447	ACCTTCTGACTCTGGACGATCTGGAGAACCTGTTGAACAGCCAGTCGGAGGAGCAGTCCA	BAC55026	ENSDART00000128163	wu:fj39g12	c-type natriuretic peptide 1 precursor	GO:0005576,GO:0005179,GO:0050880,GO:0007165	NA	NA	M_beryllina_05_2013_comp103369_c0_seq1
M_beryllina_05_2013_comp103370_c0_seq2	CUST_14989_PI429335447	ATGATGCGTAAGGACGTGAACAAGCCGAAGGGGAAGACGTCGGCCTACGCCTTCTTCGTT	XP_004575508	ENSDART00000058364	hmgb2b	---NA---	0	NA	NA	M_beryllina_05_2013_comp103370_c0_seq2
M_beryllina_05_2013_comp103373_c0_seq1	CUST_11596_PI429335447	TGTGATGGCTGCAGTCTACGGACCTGCTGAGGTCAAAGTCAGCAAGGAGATCTACGACCG	XP_003459176	ENSDART00000125931	exosc5	exosome complex exonuclease rrp41	GO:0005575,GO:0004527	NA	NA	M_beryllina_05_2013_comp103373_c0_seq1
M_beryllina_05_2013_comp103375_c0_seq2	CUST_33376_PI429335447	TTTCAATATCCATCTTTTGGATTCCCTCAGCTTCACAGGCAGCAGCAGAGGAATACTGGA	XP_004549573	NA	NA	secretory calcium-binding phosphoprotein 2 precursor	0	NA	NA	M_beryllina_05_2013_comp103375_c0_seq2
M_beryllina_05_2013_comp103386_c0_seq1	CUST_32446_PI429335447	AGAAGAGGATGCCATTCAGGTTGCTGAAGAGCGCCTGTGGTGACCTGTTCATTCCGGCCT	XP_004567972	ENSDART00000131268	rhbdd2	rhomboid domain-containing protein 3-like	0	NA	NA	M_beryllina_05_2013_comp103386_c0_seq1
M_beryllina_05_2013_comp103391_c0_seq2	CUST_2356_PI429335447	CTTCTCTACAAAGTAGCTTGTGGCAAAGGTTACCTGCAGATGTGTAGGAGAATCCTCTAA	XP_003449254	ENSDART00000005145	asz1	ankyrin sam and basic leucine zipper domain-containing protein 1-like	0	NA	NA	M_beryllina_05_2013_comp103391_c0_seq2
M_beryllina_05_2013_comp103392_c0_seq1	CUST_42475_PI429335447	TTTTAAGCAGCGATTCAGGAAGAACTTCACCGCCCTGCTGGAGGAGGAGAACCTGGCGGA	XP_003975998	ENSDART00000076800	znhit1	zinc finger hit domain-containing protein 1-like	GO:0003674,GO:0008150,GO:0005575	NA	NA	M_beryllina_05_2013_comp103392_c0_seq1
M_beryllina_05_2013_comp103393_c0_seq1	CUST_27481_PI429335447	AAGGAGAGGACACTGAGAAGAAACTAAAAGATTCTTTAAAACAGGATGTTCATTCTGACT	XP_004554359	NA	NA	PREDICTED: uncharacterized protein LOC101473037	0	NA	NA	M_beryllina_05_2013_comp103393_c0_seq1
M_beryllina_05_2013_comp103395_c0_seq1	CUST_4057_PI429335447	ATGAACAAGATGAACGATGCGCTGCAGGCAGAGCTCCAGGCGGCGTGTTCGGAGGTGGAG	XP_003453644	NA	NA	brca1-a complex subunit abraxas-like	GO:0006281	NA	NA	M_beryllina_05_2013_comp103395_c0_seq1
M_beryllina_05_2013_comp103396_c0_seq2	CUST_14476_PI429335447	TCAGGATGGAAACCAGGCCAAATATCAGACCAAAGACCAGGCCAGAGACCAGGACGGAAA	XP_004568606	ENSDART00000017849	her7	hairy and enhancer of split related-7	GO:0001757,GO:0006355,GO:0046983,GO:0003677,GO:0005634	NA	NA	M_beryllina_05_2013_comp103396_c0_seq2
M_beryllina_05_2013_comp103405_c0_seq2	CUST_8776_PI429335447	AATCAGCCTTATTCTTACACCAACTTTGGAAGTGTCGTGGTTCCACAGATGCCGATCAAC	ABB76649	ENSDART00000137590	dazl	deleted in azoospermia-like	GO:0003730,GO:0045495,GO:0008494,GO:0060965,GO:0007283,GO:0043565,GO:0070935,GO:0030154,GO:0010628,GO:0000166,GO:0007275,GO:0048477,GO:0005840,GO:0045948	NA	NA	M_beryllina_05_2013_comp103405_c0_seq2
M_beryllina_05_2013_comp103408_c0_seq2	CUST_7441_PI429335447	TTTGGTTCCAAATGAGCAGCAGCTGGCCAGACTTACTGACTATGTTGCATTCCTTGAGAA	XP_003962191	ENSDART00000034686	cops8	cop9 signalosome complex subunit 8	GO:0005737,GO:0008180	NA	NA	M_beryllina_05_2013_comp103408_c0_seq2
M_beryllina_05_2013_comp103411_c0_seq2	CUST_10081_PI429335447	TTGAAGTTGGTTGTGTCTCTCAAGCGTTGAGAATTGGAGACGATAACGTTATCGAGTCCA	XP_003450382	NA	NA	dynactin subunit 6	GO:0016740	NA	NA	M_beryllina_05_2013_comp103411_c0_seq2
M_beryllina_05_2013_comp103413_c0_seq3	CUST_38593_PI429335447	TGTCTCTGTGGACAACACCGTTTAAAGACAGTGGCAGTGATTACCTGACAGACCAATCAT	XP_003971288	ENSDART00000137631	si:ch211-137i24.10	transmembrane 4 l6 family member 1-like	GO:0016021	NA	NA	M_beryllina_05_2013_comp103413_c0_seq3
M_beryllina_05_2013_comp103416_c0_seq8	CUST_15013_PI429335447	ATTGTCCTCATTAGTTATGACCGCTTCCTGTCAGTCACGAGGGCAGTAAGTATAGGATGT	XP_004067808	ENSDART00000085196	CABZ01078515.1	histamine h3 receptor-like	GO:0030814,GO:0004969,GO:0016021,GO:0007204,GO:0001505,GO:0007187	NA	NA	M_beryllina_05_2013_comp103416_c0_seq8
M_beryllina_05_2013_comp103418_c0_seq1	CUST_40933_PI429335447	TATGTGGAAAAGCGCCATGTGCTCAGTGGCTACAAGAGAGAAAGGAAGAGATTTGTTGGA	XP_003440678	ENSDART00000064419	C20H6orf58 (1 of 2)	upf0762 protein c6orf58 homolog	GO:0005615,GO:0055123,GO:0001889	NA	NA	M_beryllina_05_2013_comp103418_c0_seq1
M_beryllina_05_2013_comp103420_c0_seq1	CUST_6757_PI429335447	AGAGTTAAGGACCCTGATGGGGTTTTGATCCGATATAAGAAGATCCTGACCACATACCAG	XP_003969145	ENSDART00000104554	ccdc106	coiled-coil domain-containing protein 106-like	GO:0003674,GO:0008150,GO:0005575	NA	NA	M_beryllina_05_2013_comp103420_c0_seq1
M_beryllina_05_2013_comp103423_c0_seq1	CUST_19795_PI429335447	TGGAGATGGTCCGGACCAGCGTCAACGACCCCTACAGTGAGTTTGTGAAGGAGGAGTTCA	XP_003453044	ENSDART00000111766	CABZ01071058.1	metal transporter cnnm3-like	GO:0003674,GO:0008150,GO:0005575	NA	NA	M_beryllina_05_2013_comp103423_c0_seq1
M_beryllina_05_2013_comp103424_c0_seq5	CUST_36205_PI429335447	ATCATAATTACCGCTTCCAAATGACTAACCTACAGCATGCTCAGTGTGGACTGGACCTGA	XP_003453014	ENSDART00000026551	srpx	sushi repeat-containing protein srpx2-like	GO:0003674,GO:0008150	NA	NA	M_beryllina_05_2013_comp103424_c0_seq5
M_beryllina_05_2013_comp103425_c2_seq2	CUST_16630_PI429335447	TTCCAGAACTTAGATGGAGAGATTGACTTGAAGCTCCTCACCAAGGTTTTAGCACCAGAG	XP_004540752	ENSDART00000124303	IFT43	intraflagellar transport protein 43 homolog a-like	GO:0035721,GO:0060271	NA	NA	M_beryllina_05_2013_comp103425_c2_seq2
M_beryllina_05_2013_comp103427_c0_seq2	CUST_42094_PI429335447	ATCCTGGTTCTGAGGCAAAAACTCTCCGAGGCCCAACTGTCCCTGCAGAGGATGAAGCTC	XP_003447306	ENSDART00000046527	tekt2	zgc:111885 protein	GO:0000226,GO:0005874	NA	NA	M_beryllina_05_2013_comp103427_c0_seq2
M_beryllina_05_2013_comp103432_c0_seq2	CUST_613_PI429335447	AGGAGAACTCAGCGCAGAAGACAGGATGCCTGGAAGACTGTGGAGCAAGGCCATCTTTGC	XP_003457856	ENSDART00000121770	rpl35a	60s ribosomal protein l35a	GO:0009790,GO:0005840,GO:0003735,GO:0006412,GO:0000049,GO:0042254	NA	NA	M_beryllina_05_2013_comp103432_c0_seq2
M_beryllina_05_2013_comp103436_c0_seq1	CUST_39088_PI429335447	AATTTCTTGGGGACTGTTTACAAAAATTCCTCCCGGGAAACGCTGATGCAGGTGCTGAAA	XP_003447176	ENSDART00000092648	tmem5	transmembrane protein 5-like	GO:0016021	NA	NA	M_beryllina_05_2013_comp103436_c0_seq1
M_beryllina_05_2013_comp103438_c0_seq1	CUST_160_PI429335447	CTCATCAAGCGGTACTGTACCAACTCGGTGTTGGTCATTATAGATGTGAAGCCTAAAGAC	XP_004069744	ENSDART00000098229	psmd7	26s proteasome non-atpase regulatory subunit 7	GO:0021551,GO:0000502	NA	NA	M_beryllina_05_2013_comp103438_c0_seq1
M_beryllina_05_2013_comp103440_c0_seq3	CUST_5422_PI429335447	GATATGATCACAGCATCAGTGTACTCACAAAATACCAGCATGGATGAGAGGAGCACTGGA	XP_004078074	ENSDART00000124693	CABZ01093075.1	c-c chemokine receptor type 5-like	GO:0006935,GO:0004950,GO:0070098,GO:0016021,GO:0007187	NA	NA	M_beryllina_05_2013_comp103440_c0_seq3
M_beryllina_05_2013_comp103446_c0_seq1	CUST_27847_PI429335447	TGACGCCACCCTGCCAGGAACTTGCAAGATTTTCACCATGGAGACCAATGGGCCTTCAGG	XP_004542755	NA	NA	PREDICTED: uncharacterized protein LOC101487892 isoform X1	0	NA	NA	M_beryllina_05_2013_comp103446_c0_seq1
M_beryllina_05_2013_comp103447_c0_seq6	CUST_35362_PI429335447	GAAAAACTCTGGAGAAGAGGGAGAATCACATAAATTTGCTTATGAAGACACTCAGATGGA	XP_003438090	ENSDART00000067734	snx16	sorting nexin-16-like	GO:0005488,GO:0009987,GO:0016740	NA	NA	M_beryllina_05_2013_comp103447_c0_seq6
M_beryllina_05_2013_comp103450_c0_seq1	CUST_30241_PI429335447	TCAAAGTTCTGACTCTGAACGAGGACCATGACTTCATGGTCATTGCCTGTGATGGCATAT	XP_003454526	ENSDART00000109665	ppm1g	protein phosphatase 1g-like	GO:0006470,GO:0046872,GO:0004722,GO:0008287	NA	NA	M_beryllina_05_2013_comp103450_c0_seq1
M_beryllina_05_2013_comp103451_c0_seq7	CUST_7144_PI429335447	AATTTGTTTACAAAAGAATCAAGCAACGAGAGCAGGTGGGGAGACCTACAGCTGTGGACA	XP_003453555	ENSDART00000114795	dpys	collapsin response mediator protein 2	GO:0005829,GO:0031103,GO:0016812,GO:0006208	NA	NA	M_beryllina_05_2013_comp103451_c0_seq7
M_beryllina_05_2013_comp103454_c0_seq3	CUST_8260_PI429335447	AACAATCAGCTCATGGCCAAAGAGCCTCTCGAGAAACTGGGATTTAAAGACTTGATGGAG	CBN81186	ENSDART00000093583	COX19	cytochrome c oxidase assembly protein cox19	GO:0003674,GO:0008150	NA	NA	M_beryllina_05_2013_comp103454_c0_seq3
M_beryllina_05_2013_comp103456_c1_seq1	CUST_41605_PI429335447	GAGTATTATCCCTATGTCTACTACAAGATCGACTGCAACCTTTTGGATTTCAAAGCTTAA	XP_004077677	ENSDART00000032275	atp6v1c1a	v-type proton atpase subunit c 1-a-like	GO:0015991,GO:0033180,GO:0015078	NA	NA	M_beryllina_05_2013_comp103456_c1_seq1
M_beryllina_05_2013_comp103460_c2_seq1	CUST_32728_PI429335447	AAGTGCGTGGACCCCTGGCTGACCAAGACCAAGAAGACGTGCCCGGTGTGCAAGCAGAAG	XP_004067940	ENSDART00000009893	ZNRF4	ring finger protein 13	GO:0008270	NA	NA	M_beryllina_05_2013_comp103460_c2_seq1
M_beryllina_05_2013_comp103466_c0_seq1	CUST_38119_PI429335447	AGCCCTGCAGTGGACACACATGAACTCACAAATGCCCTGACTACACCTTTTACAATGTAA	XP_004574485	ENSDART00000049331	gtf3aa	transcription factor iiia-like	GO:0003676	NA	NA	M_beryllina_05_2013_comp103466_c0_seq1
M_beryllina_05_2013_comp103468_c0_seq1	CUST_29851_PI429335447	TACAGCACAAAGAGCGACCTGGCCATGAACATCCGGACCCTCAGAGGTCACCATCATGAC	XP_003446759	ENSDART00000112848	CEP170B (2 of 3)	protein kiaa0284 homolog	0	NA	NA	M_beryllina_05_2013_comp103468_c0_seq1
M_beryllina_05_2013_comp103469_c0_seq1	CUST_6289_PI429335447	ATTTCCTTCTACGAGGAAAGACTGACATGGCATTCCTGTCCAGAAGACGAAGCTCAGTAA	XP_004547915	ENSDART00000130423	cbx3a	chromobox protein homolog 3	GO:0005634	NA	NA	M_beryllina_05_2013_comp103469_c0_seq1
M_beryllina_05_2013_comp103472_c0_seq1	CUST_41515_PI429335447	ACATGCTAAGTCCCTCCTACGTTCCAGATAGTTCAGTTGTGAAGAGACCATCATCTTTCC	XP_004568414	NA	NA	voltage-dependent t-type calcium channel subunit alpha-1h-like isoform x2	0	NA	NA	M_beryllina_05_2013_comp103472_c0_seq1
M_beryllina_05_2013_comp103476_c0_seq2	CUST_29248_PI429335447	CAGGAGACAGATGAGTCCAAAGAGGTTCCTTCCAATGAAACATCCAAAGATGAGCTGTAA	XP_004066011	ENSDART00000005895	pdia2	protein disulfide-isomerase-like	GO:0009055,GO:0045454,GO:0006662,GO:0016853,GO:0015035,GO:0005783,GO:0006118	NA	NA	M_beryllina_05_2013_comp103476_c0_seq2
M_beryllina_05_2013_comp103477_c0_seq6	CUST_29215_PI429335447	AAGTCTGACCACAAACAGCACAGAGGATTTTCACACAAGGATGAGCAGAGAAAGAGACTG	XP_003441202	NA	NA	protein depp-like	0	NA	NA	M_beryllina_05_2013_comp103477_c0_seq6
M_beryllina_05_2013_comp103483_c1_seq1	CUST_22537_PI429335447	TACAAAACAGATGCCAGGCTCATTTCCCAGTTCAAAGAAGAGATCAGAAACCTGTCCGGT	XP_004555346	ENSDART00000105753	olfm3a	noelin-3-like	GO:0003674,GO:0008150,GO:0005575	NA	NA	M_beryllina_05_2013_comp103483_c1_seq1
M_beryllina_05_2013_comp103484_c0_seq6	CUST_5251_PI429335447	AAGAAGCAGATCCCTTCCATCGTGTCGATGCTGACCAAAGACTTTTACTTTCCCAAGTAG	XP_004563669	ENSDART00000077348	casp3b	caspase-3 precursor	GO:0005737,GO:0004197,GO:0006508,GO:0006915	NA	NA	M_beryllina_05_2013_comp103484_c0_seq6
M_beryllina_05_2013_comp103490_c0_seq1	CUST_38776_PI429335447	TAAGGAGGCGCTGTACCCTTGGCTTAGCTTGGTCACCATCAACATCTTGACCCTGGCCCT	XP_004545682	ENSDART00000149714	TMEM121 (3 of 3)	transmembrane protein 121-like	0	NA	NA	M_beryllina_05_2013_comp103490_c0_seq1
M_beryllina_05_2013_comp103492_c0_seq1	CUST_20488_PI429335447	TCCTTCTAAGCAGCAATTGAAACAGGCTGCTGTTGAGCAGAAAACAACGGAAGGCATCAT	AAP20185	ENSDART00000079669	lamtor3	mitogen-activated protein kinase kinase 1-interacting protein 1	GO:0032947,GO:0071986,GO:0005085,GO:0032008,GO:0034613,GO:0016310,GO:0016301,GO:0071230,GO:0043087	NA	NA	M_beryllina_05_2013_comp103492_c0_seq1
M_beryllina_05_2013_comp103497_c0_seq3	CUST_2461_PI429335447	ATCACCCTTTTGAAAAGCAACATGCAGAAGGCTAAGAAGCTCCTGAAGTCAGAGCTGTGA	XP_004561006	ENSDART00000103475	agr2	anterior gradient protein 2 homolog precursor	GO:0005576,GO:0060575	NA	NA	M_beryllina_05_2013_comp103497_c0_seq3
M_beryllina_05_2013_comp103499_c0_seq7	CUST_18202_PI429335447	GAACACGTGATCGAAATGTCTGAGGAGCCGGATTATGTGAATGAAAATGGAGAATGCTGA	AEA39737	NA	NA	linker for activation of t-cells family member 2	0	NA	NA	M_beryllina_05_2013_comp103499_c0_seq7
M_beryllina_05_2013_comp103514_c0_seq1	CUST_11404_PI429335447	AACCTCCGGGGCCAGATGGAGGTCTGGGACGTGAAGAAGTACAAACAGGTGTCTAAGCTC	XP_004572634	ENSDART00000074168	eif2a	eukaryotic translation initiation factor 2a	GO:0003743,GO:0006417,GO:0005840,GO:0006446	NA	NA	M_beryllina_05_2013_comp103514_c0_seq1
M_beryllina_05_2013_comp103516_c0_seq1	CUST_27970_PI429335447	ATTTTAAACGGAATGAAGCACGCAAACTGAACCACCAGGAGGTTGTGGAGGAGGATAAGA	AEM37717	ENSDART00000099950	syf2	pre-mrna-splicing factor syf2	GO:0006397,GO:0005634,GO:0008380	NA	NA	M_beryllina_05_2013_comp103516_c0_seq1
M_beryllina_05_2013_comp103523_c0_seq1	CUST_35821_PI429335447	AGCATGGCAGAGTTCTACAGCAACCTGACCAAGTCTGCTAAATCCCTAAAGGATTTTTGA	ACN10594	ENSDART00000113904	STARD5	star-related lipid transfer protein 5-like	GO:0030301,GO:0006694,GO:0017127,GO:0015485	NA	NA	M_beryllina_05_2013_comp103523_c0_seq1
M_beryllina_05_2013_comp103526_c0_seq1	CUST_28126_PI429335447	AAACGCAAGAAGTCAACTCAGAAAATCGGGTCAAATTTGTCTGGAGCGATATTAAAAAAG	XP_004550033	ENSDART00000101479	ddx43	probable atp-dependent rna helicase ddx52-like	GO:0003676,GO:0005524,GO:0008026	NA	NA	M_beryllina_05_2013_comp103526_c0_seq1
M_beryllina_05_2013_comp103529_c4_seq1	CUST_24625_PI429335447	AAAGAGTACGACAGACTGTACGAAGAATACACCAAGACTTCGCAGGAGATCCAGATGAAG	XP_004569417	ENSDART00000040334	pik3r3b	phosphoinositide-3- regulatory polypeptide 3 ( gamma)	GO:0016301,GO:0005942,GO:0043551,GO:0007165,GO:0035014	NA	NA	M_beryllina_05_2013_comp103529_c4_seq1
M_beryllina_05_2013_comp103530_c0_seq1	CUST_17248_PI429335447	ATCATTCTAAGAAGTTAATGGACACGGTTCTGGCTTTACAGTCTGCTGTGGATCAGGAGC	XP_003437970	ENSDART00000109849	kif2c	kinesin-like protein kif2c-like	GO:0007018,GO:0005875,GO:0005524,GO:0003777,GO:0005874	NA	NA	M_beryllina_05_2013_comp103530_c0_seq1
M_beryllina_05_2013_comp103536_c0_seq1	CUST_26815_PI429335447	CCACAACTTCATCCTTAAGGCTCTTCATGAAGGACTTTGGATTCTTCAATAAATTCATTT	XP_004084355	NA	NA	PREDICTED: uncharacterized protein LOC101155079	0	NA	NA	M_beryllina_05_2013_comp103536_c0_seq1
M_beryllina_05_2013_comp103538_c0_seq4	CUST_20017_PI429335447	TCCTTCGACCCAAGAAAAAGAAGAAACTCATGAAGAAGAAAACCAAAAGAAAAGCCTTCA	XP_003459533	ENSDART00000066721	ngdn	mgc174007 protein	GO:0005737,GO:0006417,GO:0005634	NA	NA	M_beryllina_05_2013_comp103538_c0_seq4
M_beryllina_05_2013_comp103539_c0_seq3	CUST_17230_PI429335447	ATGACAGAAAAGAGATTTTCCTCTTTTCTGAAGGCAAACATCCTGAGTGCAATGGGGAAA	CBN81383	ENSDART00000114522	kif22	kinesin-like protein kif22-like	GO:0003777,GO:0005875,GO:0006281,GO:0001966,GO:0005874,GO:0007420,GO:0048592,GO:0003677,GO:0005524,GO:0007018,GO:0005515,GO:0021952,GO:0001756,GO:0005737,GO:0005634	NA	NA	M_beryllina_05_2013_comp103539_c0_seq3
M_beryllina_05_2013_comp103540_c0_seq6	CUST_14401_PI429335447	TCAAAGGACCAGCGGATCAGCCTGTGGTCCATATACAGCGAAGGAGCTGACACAGGCTGA	XP_003448659	ENSDART00000052712	gnb1l	guanine nucleotide-binding protein subunit beta-like protein 1-like	GO:0044763	NA	NA	M_beryllina_05_2013_comp103540_c0_seq6
M_beryllina_05_2013_comp103541_c0_seq2	CUST_28831_PI429335447	AAAGTCTGCTTCAGAGACAGGCGGGATGGGTACCAGCAGGACCCAGCAGAGACCAGGACG	XP_003457684	NA	NA	proprotein convertase subtilisin kexin type 1 like precursor	GO:0004867	NA	NA	M_beryllina_05_2013_comp103541_c0_seq2
M_beryllina_05_2013_comp103543_c0_seq2	CUST_19204_PI429335447	CTCGCCGCCATCTTGGACGCCGCCGTGCGGCCGGACGCGTCCCGACGGCTGTGGGGGGGG	XP_004085962	ENSDART00000114969	mfhas1	malignant fibrous histiocytoma-amplified sequence 1 homolog	GO:0005525,GO:0007264,GO:0000166	NA	NA	M_beryllina_05_2013_comp103543_c0_seq2
M_beryllina_05_2013_comp103545_c0_seq1	CUST_913_PI429335447	TACGAGAACCTGGCCGATAAGACCACCTACTTCCAGTGCTTCCAGGGAGTGACGTACCTG	XP_004068966	ENSDART00000067817	chia.3	acidic mammalian chitinase-like	GO:0005975,GO:0004568,GO:0005576,GO:0008061,GO:0006032,GO:0016998	NA	NA	M_beryllina_05_2013_comp103545_c0_seq1
M_beryllina_05_2013_comp103546_c0_seq11	CUST_5182_PI429335447	AACATTGAGTTGGATCCACGGTTCAATGACATTCTGGGAAGACATTCCCGCAAAAGATGG	XP_003454411	ENSDART00000020344	zgc:86598	casein kinase ii subunit alpha-like	GO:0006468,GO:0005524,GO:0004674,GO:0009069	NA	NA	M_beryllina_05_2013_comp103546_c0_seq11
M_beryllina_05_2013_comp103547_c0_seq2	CUST_35182_PI429335447	AACACAATAAAGATCGTTCCCTACTTCGGCCTTCTGTTCACCTGCTTTGAGATGTGCAAG	XP_003445277	ENSDART00000122534	slc25a43	solute carrier family 25 member 43-like	GO:0005743,GO:0055085,GO:0016021	NA	NA	M_beryllina_05_2013_comp103547_c0_seq2
M_beryllina_05_2013_comp103548_c0_seq4	CUST_23485_PI429335447	TTCACCACATACATCAACAGGAAGAGGAAAAACAACTGCCATGGCAACCACATCGAGATG	XP_003963065	ENSDART00000144986	otud5a	otu domain-containing protein 5-a-like	GO:0004843,GO:0071108,GO:0070536,GO:0006508,GO:0032496	NA	NA	M_beryllina_05_2013_comp103548_c0_seq4
M_beryllina_05_2013_comp103551_c1_seq2	CUST_11104_PI429335447	TATGGAAGATGTCCAGGACCTGGGCGTGAACCTGCTGGGACACCAGAGGAAGATTGTCAG	XP_003450673	ENSDART00000080477	EPHB6	ephrin type-b receptor 5-like	GO:0006468,GO:0005524,GO:0048013,GO:0005003,GO:0005887	NA	NA	M_beryllina_05_2013_comp103551_c1_seq2
M_beryllina_05_2013_comp103552_c1_seq2	CUST_35419_PI429335447	TGCCCGTGCGCGTCAACACGTCCAGCAAAAACAAGCCGCACGTGAAGAGGCCGATGAACG	XP_004563112	ENSDART00000112979	sox10	sox10 protein	GO:0071600,GO:0048840,GO:0048484,GO:0030318,GO:0050768,GO:0048752,GO:0048709,GO:0010628,GO:0001755,GO:0014044	NA	NA	M_beryllina_05_2013_comp103552_c1_seq2
M_beryllina_05_2013_comp103555_c0_seq1	CUST_37204_PI429335447	ATTTTGAAGATGCCAAAGTGAGCCTTCAACAGACACTTCTGGACCAGCAGCAGAAGATAA	XP_004568795	ENSDART00000100605	ttc32	tetratricopeptide repeat protein 32	0	NA	NA	M_beryllina_05_2013_comp103555_c0_seq1
M_beryllina_05_2013_comp103559_c0_seq8	CUST_38806_PI429335447	TGTGCTGTGCGGGGCAGAAGAGGTTTCAAACTGTTCTACCTACCTTACTTTGAAAAGTGA	ACQ58040	ENSDART00000035739	tmem134	transmembrane protein 134-like	GO:0003674,GO:0008150,GO:0005575	NA	NA	M_beryllina_05_2013_comp103559_c0_seq8
M_beryllina_05_2013_comp103560_c0_seq2	CUST_151_PI429335447	AAGGTTAAAAAACAAGCTGTTTCACGCTTTGAAATCAATTCCCCCTCTCCGAAATACTAA	XP_004541370	ENSDART00000104063	psmd4a	26s proteasome non-atpase regulatory subunit 4-like	GO:0006511,GO:0008540	NA	NA	M_beryllina_05_2013_comp103560_c0_seq2
M_beryllina_05_2013_comp103566_c0_seq3	CUST_39490_PI429335447	TTTGGATTTGGCATCTGTCGCTAACATGCTGCTTTTTGGAGGAAAACCCAGCTGTGACTT	ADG29132	ENSDART00000036275	tnni2a.4	troponin fast skeletal muscle-like	GO:0005861	NA	NA	M_beryllina_05_2013_comp103566_c0_seq3
M_beryllina_05_2013_comp103571_c0_seq1	CUST_12949_PI429335447	TTTGAGACCAGAGGAGGCACTGTTCTTTTTTGTCAACAACTCTCTTCCTCCATCCAGCTT	XP_004078009	ENSDART00000060037	GABARAPL3	gamma-aminobutyric acid receptor-associated 1	GO:0003674,GO:0008150	NA	NA	M_beryllina_05_2013_comp103571_c0_seq1
M_beryllina_05_2013_comp103572_c1_seq1	CUST_20278_PI429335447	TGTTTCTTAGGATTTGAGCTGGCGATGAAGTTTCTGAATTGGTTGGCTCCGAACCTGTGA	XP_004544805	ENSDART00000059140	slc25a20	mitochondrial carnitine acylcarnitine carrier	GO:0006810,GO:0016021	NA	NA	M_beryllina_05_2013_comp103572_c1_seq1
M_beryllina_05_2013_comp103576_c0_seq3	CUST_29185_PI429335447	TCTGTAGTGACGGTTTGTGGGGAGCTAACTGTACGTGCATGCCGGGTTTCACAGGCAGCA	XP_004075112	ENSDART00000084378	crb2a	protein crumbs homolog 1-like	GO:0045176,GO:0003094,GO:0045197,GO:0043234,GO:0007420,GO:0042462,GO:0060059,GO:0032835,GO:0045746,GO:0042384,GO:0048793	NA	NA	M_beryllina_05_2013_comp103576_c0_seq3
M_beryllina_05_2013_comp103579_c0_seq3	CUST_17272_PI429335447	AAGATCAAGTGGGAATATGACACTCAGCCCAACATTTTAAAAGGAGTGCACTACGGAGCC	XP_004563025	ENSDART00000059308	spc24	kinetochore protein spc24	GO:0031262,GO:0007049	NA	NA	M_beryllina_05_2013_comp103579_c0_seq3
M_beryllina_05_2013_comp103581_c0_seq2	CUST_32050_PI429335447	TACTGTGTCACTTATGGAGGGATTTGATAAACAGAAAGCCATCGACCTCCTCTACTGGAG	XP_003453088	ENSDART00000076574	rtn1a	reticulon-1-a-like isoform 2	GO:0005783	NA	NA	M_beryllina_05_2013_comp103581_c0_seq2
M_beryllina_05_2013_comp103582_c0_seq1	CUST_469_PI429335447	AGCGCAACACACAGATACAAGAAGAAGTACGTGACCACTCTTCTGTACAAGCCCATTTGA	XP_004072599	ENSDART00000064866	prkab1a	5-amp-activated protein kinase subunit beta-1	GO:0016301,GO:0016310	NA	NA	M_beryllina_05_2013_comp103582_c0_seq1
M_beryllina_05_2013_comp103587_c0_seq2	CUST_14827_PI429335447	GCACCAATGTTATAGTGACCAGCAACATGCCAACACCTATCCATAATGGTCAAATCTCCA	XP_004560336	ENSDART00000028236	hnf4a	hepatocyte nuclear factor 4-alpha-like	GO:0043401,GO:0008270,GO:0006355,GO:0030522,GO:0043565,GO:0003707,GO:0004879,GO:0005634	NA	NA	M_beryllina_05_2013_comp103587_c0_seq2
M_beryllina_05_2013_comp103590_c0_seq1	CUST_27583_PI429335447	TCTCTAAAGACAGGTGTAGCTGAGTGCATCGTGATGGACCAGGTGAGCCCTCAGAACCCG	XP_004552992	NA	NA	PREDICTED: uncharacterized protein LOC101477748 isoform X1	0	NA	NA	M_beryllina_05_2013_comp103590_c0_seq1
M_beryllina_05_2013_comp103593_c0_seq1	CUST_2164_PI429335447	TTTTGGAATTTCTGAAAGGGGGCGTGGACATCAGCACCTGCAATCAGAATGGTCTTAATG	XP_004086811	ENSDART00000043984	ank2b	ankyrin neuronal	GO:0007165,GO:0006508,GO:0004190	NA	NA	M_beryllina_05_2013_comp103593_c0_seq1
M_beryllina_05_2013_comp103595_c0_seq4	CUST_13657_PI429335447	CTTAAAGACTTCATGGACCGTTTTGAGGGTCTGGAGAAGATTTCTGCCTACATGAAATCA	XP_004070446	ENSDART00000049793	gstm	glutathione s-transferase mu 3	GO:0004364,GO:0006749,GO:0006803	NA	NA	M_beryllina_05_2013_comp103595_c0_seq4
M_beryllina_05_2013_comp103596_c0_seq1	CUST_17551_PI429335447	AAGAAACCTTGTGTAAAATATCACCAGTGGCCTACATTGACATCCTAGAAGGAGATGCCG	XP_004554448	ENSDART00000008554	larp7	lupus la protein homolog	GO:0003676,GO:0044424	NA	NA	M_beryllina_05_2013_comp103596_c0_seq1
M_beryllina_05_2013_comp103598_c0_seq2	CUST_1069_PI429335447	GAGGAGTTCCAGCAGTTCCAGAAAGAATACTTTGGCAGAACTGTTGAGGAGGAGAAATGA	XP_003459399	ENSDART00000123769	CABZ01084579.1	active regulator of sirt1-like	0	NA	NA	M_beryllina_05_2013_comp103598_c0_seq2
M_beryllina_05_2013_comp103600_c0_seq7	CUST_39697_PI429335447	TAGACTCTTTCCTGAAGATTTGGAAAAGAGTAGAAGAACCTCAGGGCTCAGCTCCTCAGA	XP_003458637	ENSDART00000047843	TNFRSF11B	tumor necrosis factor receptor superfamily member 11b-like	0	NA	NA	M_beryllina_05_2013_comp103600_c0_seq7
M_beryllina_05_2013_comp103601_c1_seq1	CUST_21106_PI429335447	ACAAGTACGGCTACAACAGCATGGTGGACTACAACCTGGCCCAGAGGAGGCTCTTCTCCT	XP_003439783	ENSDART00000039345	myoc	myocilin-like	GO:0014032	NA	NA	M_beryllina_05_2013_comp103601_c1_seq1
M_beryllina_05_2013_comp103603_c0_seq1	CUST_28117_PI429335447	ACGTTCATCAATAAAGGCTGTGATGAGTCTGTGCTGATGGATCTTAAAGCCCTGCTAGTC	XP_003445915	ENSDART00000061987	ddx41	probable atp-dependent rna helicase ddx41-like	GO:0008026,GO:0003676,GO:0005524,GO:0008270	NA	NA	M_beryllina_05_2013_comp103603_c0_seq1
M_beryllina_05_2013_comp103605_c3_seq1	CUST_42616_PI429335447	AGGTCAATCAGAACACACTCATACAGTGGCACCAAAAAAGGCAGAAGAAGCAGAAGCTCT	XP_002661651	ENSDART00000150266	si:ch211-145h19.3	zinc finger protein 271-like	0	NA	NA	M_beryllina_05_2013_comp103605_c3_seq1
M_beryllina_05_2013_comp103606_c0_seq2	CUST_38128_PI429335447	AAAGCAGAATATGAATTTGAACTTGACAGAGCCCTATCGCAGCCTGAAATCCCAGCTGAG	XP_004071881	ENSDART00000122628	junba	transcription factor jun-b-like	GO:0006355,GO:0031101,GO:0043565,GO:0003700,GO:0060047,GO:0005667,GO:0045449	NA	NA	M_beryllina_05_2013_comp103606_c0_seq2
M_beryllina_05_2013_comp103610_c0_seq1	CUST_13963_PI429335447	CCGTACAGACGAGGAAGGTATTAACATAGTGCTGCAGCATATTGACTTCTCCATACAGTA	XP_004074897	ENSDART00000065755	gpn3	gpn-loop gtpase 3	GO:0005524,GO:0005525	NA	NA	M_beryllina_05_2013_comp103610_c0_seq1
M_beryllina_05_2013_comp103612_c0_seq3	CUST_18865_PI429335447	ATGGTCCTGTACCAGGACAAGGTCTACAACATCCAGATCCGCCAGCAGGACCAGCTCTTC	XP_003457053	ENSDART00000059420	lcp2a	lymphocyte cytosolic protein 2-like	GO:0005575	NA	NA	M_beryllina_05_2013_comp103612_c0_seq3
M_beryllina_05_2013_comp103613_c0_seq1	CUST_39868_PI429335447	ATGATTTCCCGTCTTCAGAATGAGATTGACTCAATCAAGGCACAGAGAGGCAACCTTGAG	AAT44423	ENSDART00000065351	krt4	type ii keratin e3	GO:0031101,GO:0045095,GO:0005198	NA	NA	M_beryllina_05_2013_comp103613_c0_seq1
M_beryllina_05_2013_comp103613_c0_seq3	CUST_16579_PI429335447	TATGATTAGCCGGATCCAGAATGAGATTGAATCAGTCAAAGGACAGCGCAACAACCTGGA	XP_004565490	ENSDART00000065351	krt4	intermediate filament protein on3-like	GO:0031101,GO:0045095,GO:0005198	NA	NA	M_beryllina_05_2013_comp103613_c0_seq3
M_beryllina_05_2013_comp103613_c0_seq4	CUST_17098_PI429335447	ATCAAGATGATCGAGACCAAGGATGGCCGAGTGGTGTCCGAGTCCTCCGAGGTCATTGAG	XP_004565491	ENSDART00000081215	krt8	keratin 8	GO:0005882,GO:0005634	NA	NA	M_beryllina_05_2013_comp103613_c0_seq4
M_beryllina_05_2013_comp103614_c0_seq1	CUST_37915_PI429335447	GGAAGTCAAAGAAAATACGTAAAACTATAAAAATGGAGGATGGGAGACCCGGTCCAGACG	XP_004073161	NA	NA	transcription cofactor vestigial-like protein 1	GO:0044699,GO:0050794	NA	NA	M_beryllina_05_2013_comp103614_c0_seq1
M_beryllina_05_2013_comp103614_c0_seq2	CUST_27031_PI429335447	TTAAAATAATAGCAATCAGTTCATCCTCTCCATGCTTCCCCACTGCAGAGGATGGGAGAC	XP_004073161	NA	NA	PREDICTED: uncharacterized protein LOC101167627	GO:0044699	NA	NA	M_beryllina_05_2013_comp103614_c0_seq2
M_beryllina_05_2013_comp103621_c0_seq3	CUST_38125_PI429335447	AATCAGCGGCTACAAGGACGAGATCGAGACGGAGCTGGAGAAGAGCCGACCGCGTCTGAG	XP_004084058	ENSDART00000035827	brf1b	transcription factor iiib 90 kda subunit-like	GO:0003743,GO:0017025,GO:0008270,GO:0006352,GO:0045893,GO:0005634,GO:0005840,GO:0006446	NA	NA	M_beryllina_05_2013_comp103621_c0_seq3
M_beryllina_05_2013_comp103622_c0_seq1	CUST_28228_PI429335447	GATGAAGACACTGATGATGAGGATTTTCCCTTTTATCTAACTGAGGAGTTGGGTGTCTGA	ADP89907	ENSDART00000104346	mkrn4	probable e3 ubiquitin-protein ligase makorin-2-like	GO:0003676,GO:0008270,GO:0046872,GO:0016874,GO:0016567	NA	NA	M_beryllina_05_2013_comp103622_c0_seq1
M_beryllina_05_2013_comp103626_c0_seq3	CUST_1174_PI429335447	TTTTCACGAATGAGAGAAACATTTCCAAGCTGGAGATTCATGGTTTCTCCACGCGCCACT	XP_004574077	ENSDART00000084425	acyp1	acylphosphatase-2 precursor	GO:0003998,GO:0006094,GO:0006096,GO:0018874	NA	NA	M_beryllina_05_2013_comp103626_c0_seq3
M_beryllina_05_2013_comp103629_c0_seq2	CUST_9409_PI429335447	TCATTCAAGGTCTACTACCCATCCAACAGAACTGTTGAGGACAGCAAACTTCAAGGACTC	XP_003459591	ENSDART00000130765	pole2	dna polymerase epsilon subunit 2-like	GO:0006261,GO:0003887,GO:0003677,GO:0005634,GO:0042575	NA	NA	M_beryllina_05_2013_comp103629_c0_seq2
M_beryllina_05_2013_comp103632_c1_seq3	CUST_30829_PI429335447	ATCATGGCTTTGCCGCTGCCTGAGTCATTGAAAGCATATTTGCTGTATTACAGAGAGAAA	XP_004542858	ENSDART00000075142	pcmtd1	protein-l-isoaspartate o-methyltransferase domain-containing protein 1-like	GO:0006464,GO:0004719,GO:0006479,GO:0046500	NA	NA	M_beryllina_05_2013_comp103632_c1_seq3
M_beryllina_05_2013_comp103636_c1_seq1	CUST_33403_PI429335447	GATGCCTTTTTTCAAACCCTAGACGAGCTGACCATCGAACTGCCTTCAGAATCTTCCTAA	ACQ58837	ENSDART00000130867	SOWAHD	ankyrin repeat domain-containing protein sowahc-like	GO:0003674,GO:0008150,GO:0005575	NA	NA	M_beryllina_05_2013_comp103636_c1_seq1
M_beryllina_05_2013_comp103637_c0_seq1	CUST_21568_PI429335447	CTATGAAAAGATGATGGCTGCCATCCAGATAGAGAAGGAAAAGGCTGACATGAGACTGAC	XP_003439860	ENSDART00000112809	ndufb5	nadh dehydrogenase 1 beta subcomplex subunit mitochondrial precursor	GO:0008137,GO:0006120,GO:0006744,GO:0006814,GO:0015992	NA	NA	M_beryllina_05_2013_comp103637_c0_seq1
M_beryllina_05_2013_comp103639_c0_seq2	CUST_9001_PI429335447	AATCTGGCAGGTCATCATTAGCCAACGTGCTAAGGTTCAAGACCAGCAAGATGAATGCAA	ACQ58372	ENSDART00000051183	diabloa	diablo mitochondrial precursor	GO:0006917,GO:0006919,GO:0005739	NA	NA	M_beryllina_05_2013_comp103639_c0_seq2
M_beryllina_05_2013_comp103641_c0_seq4	CUST_28528_PI429335447	TGACCCTCTACACGTCCTACAAAGAGAGGAACATCTTCCTGGTGGCCCTGCAGAAGGACC	XP_004572652	ENSDART00000142995	spcs2	probable signal peptidase complex subunit 2	GO:0008233,GO:0006465,GO:0016021,GO:0006508,GO:0005787	NA	NA	M_beryllina_05_2013_comp103641_c0_seq4
M_beryllina_05_2013_comp103642_c0_seq2	CUST_26641_PI429335447	AATGAACCAATAAATGAGGACTCCATAGCAGAAGCTCTTCAGAGAACCTCCAGGGCCATT	XP_003445660	ENSDART00000142762	C5H5orf34	PREDICTED: uncharacterized protein C5orf34 homolog	GO:0003674,GO:0008150,GO:0005575	NA	NA	M_beryllina_05_2013_comp103642_c0_seq2
M_beryllina_05_2013_comp103645_c0_seq1	CUST_4780_PI429335447	TTTCAAAGAGGCGAACGTCAAGTCGAACGGAATCATCAACTATGAGGAGTTCACCCACAT	ACQ57878	ENSDART00000109635	calml4a	calmodulin-like protein 4	GO:0005509	NA	NA	M_beryllina_05_2013_comp103645_c0_seq1
M_beryllina_05_2013_comp103646_c0_seq2	CUST_21349_PI429335447	CACCAATCCTTTGTATGTGAACTACTCGAACCATGTGCTGTTCCCTGTTGTTAGCTTACG	XP_004573424	ENSDART00000020004	mtmr2	myotubularin-related protein 2	GO:0004725,GO:0016020,GO:0005737,GO:0035335,GO:0006570	NA	NA	M_beryllina_05_2013_comp103646_c0_seq2
M_beryllina_05_2013_comp103648_c0_seq1	CUST_28438_PI429335447	TCCTTTCAGGGGCTAATTCCAAGAGACCTCCAAACCCAAAGCATAATGTCACGTGACATT	XP_004074954	ENSDART00000063671	zdhhc8a	probable palmitoyltransferase zdhhc8-like	GO:0008270	NA	NA	M_beryllina_05_2013_comp103648_c0_seq1
M_beryllina_05_2013_comp103649_c0_seq2	CUST_36865_PI429335447	TCCTCTAATTCTTATGACCTGCTGATCACCAATGTCTCTCCTTCTGATGAAGGCATTTAC	XP_004564412	NA	NA	tcr-alpha v segment ii-35	0	NA	NA	M_beryllina_05_2013_comp103649_c0_seq2
M_beryllina_05_2013_comp103655_c0_seq2	CUST_11800_PI429335447	TATCTGATGTCTGAGCGCATGGAACGGTACTCAAAATCCAAAATGCATAACATTAACTCA	XP_004541145	ENSDART00000029797	faf2	fas-associated factor 2-like	GO:0003674,GO:0008150,GO:0005575,GO:0060037,GO:0051216	NA	NA	M_beryllina_05_2013_comp103655_c0_seq2
M_beryllina_05_2013_comp103661_c0_seq2	CUST_35200_PI429335447	TCATGCATCACATGGGGAATCACCACTGCTATTTATGACAGGCAGGAGAAGAAACAAACC	XP_003445992	ENSDART00000078610	zgc:73228	solute carrier family 25 member 53-like	GO:0006810,GO:0016021	NA	NA	M_beryllina_05_2013_comp103661_c0_seq2
M_beryllina_05_2013_comp103663_c0_seq3	CUST_32575_PI429335447	GTCACCTCAATAGCGGACAGGCTAAATGTGGACTTTGCTCTCATTCACAAAGAGAGGAAA	XP_003445943	ENSDART00000054619	prps1b	ribose-phosphate pyrophosphokinase 1	GO:0009165,GO:0016301,GO:0016310,GO:0009156,GO:0004749,GO:0000287,GO:0009116,GO:0006098,GO:0006144	NA	NA	M_beryllina_05_2013_comp103663_c0_seq3
M_beryllina_05_2013_comp103664_c0_seq2	CUST_4231_PI429335447	ACAATATGGACAAGCTACACCGAATACGTATTCTGCCGAGAGTAACCAGCAGTGTTCAAG	XP_004081504	ENSDART00000101977	kctd12.1	btb poz domain-containing protein kctd12-like	GO:0048814,GO:0051260,GO:0021986	NA	NA	M_beryllina_05_2013_comp103664_c0_seq2
M_beryllina_05_2013_comp103674_c1_seq1	CUST_3061_PI429335447	ACGAGTGAGGAGATAGCAGAGCTTTGGATGAAATACTACTCTAGCAAAGACACGATCAGC	XP_004572389	ENSDART00000130810	atpaf1	atp synthase mitochondrial f1 complex assembly factor 1-like isoform 1	GO:0005739,GO:0006461	NA	NA	M_beryllina_05_2013_comp103674_c1_seq1
M_beryllina_05_2013_comp103675_c0_seq2	CUST_94_PI429335447	TGCCATGGAGCCAGAAGCAAGAGAAACTGTGCAGGTGATGGAGGTCTCCCCAGAAAAGCC	XP_004552361	NA	NA	2 -cyclic-nucleotide 3 -phosphodiesterase-like	GO:0016070,GO:0016020,GO:0003824,GO:0004113,GO:0009214,GO:0005622	NA	NA	M_beryllina_05_2013_comp103675_c0_seq2
M_beryllina_05_2013_comp103676_c0_seq1	CUST_538_PI429335447	GGAGAAGAAAGAAGAGTCTGAGGAGTCCGATGACGACATGGGATTCGGCCTCTTCGACTA	ACH70992	ENSDART00000013690	rplp2l	60s acidic ribosomal protein p2	GO:0009790,GO:0005840,GO:0003735,GO:0006414,GO:0042254	NA	NA	M_beryllina_05_2013_comp103676_c0_seq1
M_beryllina_05_2013_comp103679_c0_seq1	CUST_27040_PI429335447	GCCTTGTGTCTGGATGGAGACGGAGAAGATGACATGGACACCATCATCACAAAAGAATAA	XP_004077831	NA	NA	PREDICTED: uncharacterized protein LOC101168235 isoform 1	0	NA	NA	M_beryllina_05_2013_comp103679_c0_seq1
M_beryllina_05_2013_comp103682_c0_seq3	CUST_18328_PI429335447	TATCAGCAGCAAACCGTCTGGAGCTTTCTGCCAAAACAACTTTGAATGTTCCACAGGACT	AFC90192	NA	NA	liver-expressed antimicrobial peptide 2	GO:0042742	NA	NA	M_beryllina_05_2013_comp103682_c0_seq3
M_beryllina_05_2013_comp103683_c0_seq1	CUST_19537_PI429335447	TCAGGACACTTCCTATGATGTCTATGAATATTGCTCAGGTATGGCCATTGCTCCAGGAGT	XP_004558473	ENSDART00000127325	wu:fc75a09	megalocytivirus-induced protein 1	0	NA	NA	M_beryllina_05_2013_comp103683_c0_seq1
M_beryllina_05_2013_comp103687_c0_seq3	CUST_41227_PI429335447	TGCCCGTAAAATGCTTGAGGTAAAAACACAGACTCCAACTACGTTTCCATTTATTACTTT	XP_004573156	ENSDART00000127150	arhgef39	vav-like protein c9orf100 homolog	GO:0005543,GO:0005089,GO:0035023,GO:0005622	NA	NA	M_beryllina_05_2013_comp103687_c0_seq3
M_beryllina_05_2013_comp103689_c1_seq1	CUST_37264_PI429335447	TATATGGCTCCAGAGGTCCTGGACGACTCCATAAACATGAAACACTTTGAGTCGTTCAAG	XP_003457563	ENSDART00000061973	tgfbr1b	tgf-beta receptor type-1-like	GO:0006468,GO:0009953,GO:0031101,GO:0007493,GO:0023014,GO:0005524,GO:0005024,GO:0007178,GO:0001707,GO:0016020,GO:0004702,GO:0009069	NA	NA	M_beryllina_05_2013_comp103689_c1_seq1
M_beryllina_05_2013_comp103691_c0_seq8	CUST_24955_PI429335447	ATCATCCTAGGGATCAGCAGCCTAGGGACCAGCAACCTAGGGATCAGCTTCGGGATCATC	XP_004069059	ENSDART00000032844	PLEKHA6	pleckstrin homology domain-containing family a member 6-like	GO:0005915,GO:0008016,GO:0090136,GO:0055007,GO:0045218,GO:0005813,GO:0070097	NA	NA	M_beryllina_05_2013_comp103691_c0_seq8
M_beryllina_05_2013_comp103692_c0_seq2	CUST_15793_PI429335447	GAGGAGAACTGTGAAGTCACTCTAGTTACAGAAACTGAAATCTGCAAACTGAACCGTTGA	XP_004080131	NA	NA	il-13 receptor-alpha-1-a precursor	0	NA	NA	M_beryllina_05_2013_comp103692_c0_seq2
M_beryllina_05_2013_comp103692_c0_seq4	CUST_16492_PI429335447	CACTGGTGATTGCATGTCTGGCAGCTATGACATTTAAGTTTTATCTTAAGTATGAAAAGT	XP_004080131	NA	NA	interleukin-13 receptor alpha-2 chain precursor	0	NA	NA	M_beryllina_05_2013_comp103692_c0_seq4
M_beryllina_05_2013_comp103701_c0_seq1	CUST_2113_PI429335447	TATTACTCAGTCGGCCACAACATCAGAAAGCTCAACGGCATCAAATGGCACCACTTCAAA	XP_003451928	ENSDART00000109852	ANGPT4	angiopoietin-1-like	GO:0007169,GO:0001568	NA	NA	M_beryllina_05_2013_comp103701_c0_seq1
M_beryllina_05_2013_comp103703_c1_seq1	CUST_22051_PI429335447	AGATTTAGAGAGTGAGCTGAGAGGCACTAAACAGGAAATGGCTCGCTACCTGAAAGAGTA	XP_003444472	ENSDART00000136196	nefla	neurofilament light polypeptide-like	GO:0005882,GO:0005198	NA	NA	M_beryllina_05_2013_comp103703_c1_seq1
M_beryllina_05_2013_comp103704_c1_seq1	CUST_1696_PI429335447	TCAACTCGGCCATCGCAGCCATCAAAACCAAACGCACCATCCAGTTTGTGGACTGGTGCC	AAI55066	ENSDART00000016360	si:ch73-199e17.1	alpha 8 like 3	GO:0007017,GO:0005525,GO:0006184,GO:0005737,GO:0005874,GO:0051258,GO:0042552,GO:0003924,GO:0005200,GO:0021782	NA	NA	M_beryllina_05_2013_comp103704_c1_seq1
M_beryllina_05_2013_comp103704_c1_seq3	CUST_39568_PI429335447	TTGATATTGAACGCCCATCCTATACCAATCTCAACCGTCTAATCAGCCAGATCGTGTCGT	XP_004563346	ENSDART00000129426	tuba8l4	tubulin alpha-1a chain	GO:0007017,GO:0005525,GO:0006184,GO:0005737,GO:0005874,GO:0051258,GO:0042552,GO:0003924,GO:0005200,GO:0021782	NA	NA	M_beryllina_05_2013_comp103704_c1_seq3
M_beryllina_05_2013_comp103704_c1_seq4	CUST_39571_PI429335447	AAATAACTATGCCCGAGGACACTACACCATCGGCAAAGAGATAATTGACTCGGTTCTGGA	AAH59428	ENSDART00000040204	tuba8l2	tubulin alpha-1c chain-like	GO:0005874,GO:0051258,GO:0006184,GO:0007017,GO:0003924,GO:0005200,GO:0005737,GO:0005525	NA	NA	M_beryllina_05_2013_comp103704_c1_seq4
M_beryllina_05_2013_comp103708_c0_seq4	CUST_32776_PI429335447	AATGCAGCAAATGAAGAGGAAGCTAAATGAGCAGGGTTCCTACATTGCGCAGCTGGAAAA	XP_004553652	ENSDART00000129838	BX005356.3	ring finger protein 212-like	0	NA	NA	M_beryllina_05_2013_comp103708_c0_seq4
M_beryllina_05_2013_comp103714_c0_seq4	CUST_10945_PI429335447	TTATTCTGCGAGTTCTACAAGGATGAGGACGACTACGGAGACGAATATGGGATCTGCAAA	XP_003451538	ENSDART00000084545	esm1	endothelial cell-specific molecule 1-like	GO:0005520,GO:0001558,GO:0016942	NA	NA	M_beryllina_05_2013_comp103714_c0_seq4
M_beryllina_05_2013_comp103715_c0_seq1	CUST_35230_PI429335447	TATACATGTGAAATCCATTTCAACACGGTGCGCCTCATCGCTGTGTTCATCATCTGTCTG	XP_004556056	ENSDART00000083657	slc35f3b	solute carrier family 35 member f4-like	0	NA	NA	M_beryllina_05_2013_comp103715_c0_seq1
M_beryllina_05_2013_comp103716_c0_seq1	CUST_23764_PI429335447	AAATAACAGCAAAGCTGAAACCCAAACCTCTCAGACGCAAAAATGCGACAGACAGCTTCA	XP_004069913	ENSDART00000110262	panx2	pannexin partial	GO:0005921,GO:0031410	NA	NA	M_beryllina_05_2013_comp103716_c0_seq1
M_beryllina_05_2013_comp103731_c0_seq15	CUST_9133_PI429335447	TTAGTAGGTTTCTTTTGCATTGTTTTGTGTTTCCTCCTTATCTGCAGCTTCATTAAGGGT	XP_003442298	ENSDART00000110966	MVD	diphosphomevalonate decarboxylase-like	GO:0004163,GO:0008299,GO:0005524,GO:0006695,GO:0016310	NA	NA	M_beryllina_05_2013_comp103731_c0_seq15
M_beryllina_05_2013_comp103731_c0_seq5	CUST_9136_PI429335447	ATGGAATAAACTACATTATTAGTACCAAGGCTGGACCAGGCCCTTGTGTTGTGGAGGACT	XP_003442298	ENSDART00000110966	MVD	diphosphomevalonate decarboxylase-like	GO:0004163,GO:0008299,GO:0005524,GO:0006695,GO:0016310	NA	NA	M_beryllina_05_2013_comp103731_c0_seq5
M_beryllina_05_2013_comp103732_c0_seq6	CUST_29752_PI429335447	AAAGGTGGCAATACGAACCAGTCTCTTACACACACTCAAACACACAAGTACTTTACATAA	XP_003441908	ENSDART00000002644	fra10ac1	protein fra10ac1 homolog	GO:0003674,GO:0008150,GO:0005575	NA	NA	M_beryllina_05_2013_comp103732_c0_seq6
M_beryllina_05_2013_comp103734_c0_seq6	CUST_18682_PI429335447	CAGATCCTGGAAAACCACCTGAAGATGAACCAGGCGGATCACATGACCACCTCCGCCTAG	XP_003458718	ENSDART00000143486	selt2	low quality protein: selenoprotein t2-like	GO:0045454,GO:0008430	NA	NA	M_beryllina_05_2013_comp103734_c0_seq6
M_beryllina_05_2013_comp103735_c0_seq5	CUST_15769_PI429335447	AATCTTCAACGACCTGGACAAAGACAAGAACAACAGTGTGGATTTCGGGGAGTTTGTCAG	XP_003452493	ENSDART00000004679	icn	ictacalcin	GO:0005509	NA	NA	M_beryllina_05_2013_comp103735_c0_seq5
M_beryllina_05_2013_comp103736_c1_seq1	CUST_25996_PI429335447	TATGAAAAAGACAAAGCACAGACAAGAGAAGGGCTGTCCTTCCATGAGTGGGACTCTGAT	XP_003450662	ENSDART00000103882	grin2db	PREDICTED: hypothetical protein LOC100699220	0	NA	NA	M_beryllina_05_2013_comp103736_c1_seq1
M_beryllina_05_2013_comp103738_c0_seq1	CUST_22063_PI429335447	CACTTACACCATGATAGGGCGCCACCATACGAGGATCTCAACGCTTTTTTCCACAATTGA	XP_003441883	ENSDART00000002078	neurod2	neurogenic differentiation factor 2-like	GO:0006355,GO:0003677,GO:0007399,GO:0030154,GO:0046983,GO:0005634	NA	NA	M_beryllina_05_2013_comp103738_c0_seq1
M_beryllina_05_2013_comp103739_c0_seq1	CUST_36766_PI429335447	CAACACAGCAATACAGTCGATTGGAGCCAGTACCCACTTTTCTCCTATTCCAATTGGTGA	XP_003444442	ENSDART00000007090	tbx16	t-box-containing protein tbx6l-like	GO:0001525,GO:0048389,GO:0060218,GO:0001947,GO:0044212,GO:0060809,GO:0030218,GO:0007525,GO:0039023,GO:2000223,GO:0001570	NA	NA	M_beryllina_05_2013_comp103739_c0_seq1
M_beryllina_05_2013_comp103741_c1_seq2	CUST_21667_PI429335447	TCTTTTTCTTCTATCCGCTGGACTTTACCTTTGTGTGTCCCACGGAGATCATCGCTTTCA	AEH76567	ENSDART00000134921	prdx1	natural killer cell enhancement factor	GO:0055114,GO:0016209,GO:0051920	NA	NA	M_beryllina_05_2013_comp103741_c1_seq2
M_beryllina_05_2013_comp103743_c2_seq2	CUST_41401_PI429335447	TCTACACCAAGGTGTCCAACTACCAGCAGTGGATCCGGCAGGTGCAGGACGAGTGGGACC	XP_004078808	ENSDART00000100954	proc	vitamin k-dependent protein c-like	GO:0004252,GO:0007596,GO:0005509,GO:0005576,GO:0006508	NA	NA	M_beryllina_05_2013_comp103743_c2_seq2
M_beryllina_05_2013_comp103750_c0_seq1	CUST_34435_PI429335447	TTTCTCCTGTTCCGGAGCTTTTATACTGTTCCGTGAAAGCTGTTACCCGCAAACTCAACT	XP_004553599	ENSDART00000131467	si:ch1073-126c3.2	si:ch1073- precursor	0	NA	NA	M_beryllina_05_2013_comp103750_c0_seq1
M_beryllina_05_2013_comp103751_c0_seq2	CUST_41794_PI429335447	TTTCACGAAAGAGGTCAACAGCTGCACACATTTAAGGATGATGAGAACCTCAGCACAGTG	XP_004539641	ENSDART00000075588	wdr76	wd repeat-containing protein 76-like	GO:0003674,GO:0008150,GO:0005575	NA	NA	M_beryllina_05_2013_comp103751_c0_seq2
M_beryllina_05_2013_comp103752_c0_seq4	CUST_41065_PI429335447	AACGAGGAAGTTAAGAGACTTTGTGCGACGCAGTTCAACAACATATTTTTCTTGGACTGA	XP_003438776	ENSDART00000079065	ccz1	vacuolar fusion protein ccz1 homolog	GO:0005765	NA	NA	M_beryllina_05_2013_comp103752_c0_seq4
M_beryllina_05_2013_comp103753_c0_seq3	CUST_2710_PI429335447	AAATTCAAACAGCAAGACACCACATGGGAAAAAGAGGACAAGTTAAAGACTGCACATTTA	XP_004078186	ENSDART00000124718	aqp10a	aquaporin-10-like	GO:0006833,GO:0071918,GO:0005372,GO:0015168,GO:0015105,GO:0015204,GO:0016021,GO:0015793,GO:0015700	NA	NA	M_beryllina_05_2013_comp103753_c0_seq3
M_beryllina_05_2013_comp103755_c0_seq7	CUST_25825_PI429335447	AGACGAGAATTCAGTTTACGCCCGAGTCAGCAAGAAGCTGAGAGGAGCACCCGTCCACAC	XP_003437798	NA	NA	PREDICTED: hypothetical protein LOC100691497	0	NA	NA	M_beryllina_05_2013_comp103755_c0_seq7
M_beryllina_05_2013_comp103755_c0_seq9	CUST_26980_PI429335447	AGACGAGAATTCAGTTTACGCCCGAGTCAGCAAGAAGCTGAGAGGAGCACCCGTCCACAC	XP_004086127	NA	NA	PREDICTED: uncharacterized protein LOC101165622	0	NA	NA	M_beryllina_05_2013_comp103755_c0_seq9
M_beryllina_05_2013_comp103756_c0_seq2	CUST_1489_PI429335447	ACTACCACGAGGTCCAGAACCTGTGGGTGAAAATCGACCTGACCCTACTTAGCAGGGTGC	XP_004563331	ENSDART00000074070	aff2	af4 fmr2 family member 2-like	0	NA	NA	M_beryllina_05_2013_comp103756_c0_seq2
M_beryllina_05_2013_comp103759_c1_seq9	CUST_6784_PI429335447	CCTGCAGAAACGAGCAGAGCTGCAGAAGGAGAGTGAGGAGCTCAGCAGAGCCACCAGGGA	XP_003457972	ENSDART00000101771	ccdc11	coiled-coil domain-containing protein 11-like	0	NA	NA	M_beryllina_05_2013_comp103759_c1_seq9
M_beryllina_05_2013_comp103763_c0_seq1	CUST_29689_PI429335447	TACAACAAGATGAAGTCCAAGCAGGTTTACAGCCGCTTCGAGCTGAAGAGCTCCGACTAG	XP_003456285	ENSDART00000112146	CR388068.1	protein fam83c-like	0	NA	NA	M_beryllina_05_2013_comp103763_c0_seq1
M_beryllina_05_2013_comp103765_c0_seq1	CUST_21205_PI429335447	ACAGAGAAAAGTCCTTATATCTGACCCAGATCCGACACCTGGACGAGCAGCTGGAGAGGT	XP_004555824	NA	NA	myosin heavy chain like protein	0	NA	NA	M_beryllina_05_2013_comp103765_c0_seq1
M_beryllina_05_2013_comp103779_c0_seq2	CUST_22918_PI429335447	GCTGGTGCAACTGACGTTGAGGCAAAGAAAATGAAGCGTGCTGAAAGATTTGGAAAGGTA	XP_004560329	ENSDART00000082458	sarnp	nuclear protein hcc-1	GO:0003676	NA	NA	M_beryllina_05_2013_comp103779_c0_seq2
M_beryllina_05_2013_comp103780_c1_seq2	CUST_27811_PI429335447	CAGCAACTTGCTGAGACCATTATCTCCTCTTCTCTCGATAAAGCCAAAATGCTCGACTAG	XP_004573810	NA	NA	PREDICTED: uncharacterized protein LOC101486873	0	NA	NA	M_beryllina_05_2013_comp103780_c1_seq2
M_beryllina_05_2013_comp103784_c0_seq7	CUST_41143_PI429335447	CCAGAGGATTTGTTAAATGCTTGCAAAATGTTTGAGCAACTGAAGCTCCCAGTAAGGTGA	XP_004550087	ENSDART00000079597	vps36	vacuolar protein-sorting-associated protein 36-like	GO:0015031,GO:0043130,GO:0005768,GO:0032266	NA	NA	M_beryllina_05_2013_comp103784_c0_seq7
M_beryllina_05_2013_comp103786_c0_seq2	CUST_15253_PI429335447	AAGAACTCTATTCCTACCACGGAGGAAATAGAGGCTGAAGAGCGAAGACTGAAAATGGAG	XP_003441731	ENSDART00000138806	BARX2	homeobox 2-like	GO:0060037,GO:0051216,GO:0006355,GO:0002053,GO:0003700,GO:0000976,GO:0005667,GO:0045449	NA	NA	M_beryllina_05_2013_comp103786_c0_seq2
M_beryllina_05_2013_comp103787_c0_seq1	CUST_2479_PI429335447	GCCCTCGTAAAAGGTGAAACTAACACTTTGTGTGTTCGTCTAAAACTCTGCAAGAAAATG	AAN77873	NA	NA	antimicrobial peptide nk-lysin-like	GO:0006629	NA	NA	M_beryllina_05_2013_comp103787_c0_seq1
M_beryllina_05_2013_comp103792_c0_seq2	CUST_36010_PI429335447	TTCTTAAGGAGGGATGTGACAAAATGGACAGCATCTACGGGACTATGGAGGACATGAAGA	XP_003443735	ENSDART00000015559	sdha	succinate dehydrogenase	GO:0050660,GO:0005743,GO:0006105,GO:0006810,GO:0006099,GO:0008177,GO:0022904,GO:0006119,GO:0045281	NA	NA	M_beryllina_05_2013_comp103792_c0_seq2
M_beryllina_05_2013_comp103797_c0_seq8	CUST_14059_PI429335447	ATCGCAGCTTCATGATGATTTTCCGCCTGTGGCAGAACGCCCTGTTGGACAAGGCCCTGT	XP_003977170	ENSDART00000142648	gramd1a	gram domain-containing protein 1b-like	0	NA	NA	M_beryllina_05_2013_comp103797_c0_seq8
M_beryllina_05_2013_comp103799_c0_seq1	CUST_11941_PI429335447	TAAACAGATTCTAGAGCCTCTGGCCAAAACTAAAGCTCTAATCGCTGGAGGACTGGTAGA	XP_004067325	ENSDART00000075538	fbxo22	f-box only protein 22-like	0	NA	NA	M_beryllina_05_2013_comp103799_c0_seq1
M_beryllina_05_2013_comp103803_c0_seq9	CUST_27937_PI429335447	TAAGATACACTCAGCCCCCAACAGATTTATTAGAGTGGTATGACGGTTTCCTGGATGATG	XP_004542600	ENSDART00000075080	prpf38b	pre-mrna-splicing factor 38b-like	GO:0005681,GO:0003674,GO:0008380,GO:0006397,GO:0005634	NA	NA	M_beryllina_05_2013_comp103803_c0_seq9
M_beryllina_05_2013_comp103805_c0_seq2	CUST_30145_PI429335447	AGAACAAGTTCGGTGTGACGCTGCTGTATCTGATCCTGAGCGAAGGCGAGCGGATGCAGA	XP_004538740	ENSDART00000100937	patl1	protein pat1 homolog 2-like	GO:0003723,GO:0000290,GO:0030014,GO:0000932,GO:0016607,GO:0033962,GO:0016605	NA	NA	M_beryllina_05_2013_comp103805_c0_seq2
M_beryllina_05_2013_comp103808_c1_seq3	CUST_24760_PI429335447	AATCAGAGAATATATTGACAACATGGGTGGCGTAGGCCTTTGTGACCGAATGCTGAGCTT	XP_004576623	ENSDART00000110925	si:ch211-173p18.3	piggybac transposable element-derived protein 3-like	0	NA	NA	M_beryllina_05_2013_comp103808_c1_seq3
M_beryllina_05_2013_comp103814_c0_seq4	CUST_32971_PI429335447	TAAGTTTACTGGGGAAAGTAAAGGACTGGGCTATGTCAGATACTACAAACCCTCCCAAGC	XP_003438298	ENSDART00000093415	rbm45	rna-binding protein 45-like	GO:0003676,GO:0000166	NA	NA	M_beryllina_05_2013_comp103814_c0_seq4
M_beryllina_05_2013_comp103818_c0_seq2	CUST_5578_PI429335447	CCTTCTCCTGCTGTTACTTGTCATCATGACCTTATACTGCAACCATATGAGAACACGGAG	CAH60272	NA	NA	cd8 alpha chain	0	NA	NA	M_beryllina_05_2013_comp103818_c0_seq2
M_beryllina_05_2013_comp103819_c3_seq1	CUST_11494_PI429335447	GAGACTGTGAAACCTGACACACCCGAGAAAGAAGAGGATGACATTGACATTGATGCTATC	XP_003447831	ENSDART00000019476	eif5	eukaryotic translation initiation factor 5	GO:0003743,GO:0016070,GO:0005840,GO:0006446	NA	NA	M_beryllina_05_2013_comp103819_c3_seq1
M_beryllina_05_2013_comp103821_c0_seq1	CUST_31246_PI429335447	AAGAAGATCGAGCGCTGGCATGTTCTAGTAAATGACAACACCGTCCAGTTCGAGGATTAA	XP_003455159	ENSDART00000092684	RPH3A (1 of 2)	rabphilin-3a-like isoform x1	GO:0016020,GO:0008021,GO:0006810,GO:0005215	NA	NA	M_beryllina_05_2013_comp103821_c0_seq1
M_beryllina_05_2013_comp103826_c0_seq1	CUST_13570_PI429335447	ACTCCATCGAGAAGCTGGGGAAGAGGCACCGCTATCATATCCGTGCCTACGATCCCAAAG	XP_004079309	ENSDART00000100170	glula	glutamine synthetase	GO:0004356,GO:0005524,GO:0006542,GO:0009252	NA	NA	M_beryllina_05_2013_comp103826_c0_seq1
M_beryllina_05_2013_comp103830_c0_seq1	CUST_20926_PI429335447	CTTTAAAATGATACTTTTGTGCCGCTGGGACCAGAAGAAAAGAAGGAAGCAGCAGTTCCA	XP_004551533	ENSDART00000104893	chrm3a	muscarinic acetylcholine receptor m3-like	GO:0016907,GO:0045987,GO:0007213,GO:1900274,GO:0043269,GO:0005887,GO:0007187,GO:0007268	NA	NA	M_beryllina_05_2013_comp103830_c0_seq1
M_beryllina_05_2013_comp103833_c0_seq1	CUST_36691_PI429335447	AGGACGACATCCTGAAGATCCACGACAGCCTGGAGATCTACCAGTACCTCCGCTTCTTCC	CAF90403	ENSDART00000105344	TBC1D2	tbc1 domain family member 2b-like	GO:0032313,GO:0005096	NA	NA	M_beryllina_05_2013_comp103833_c0_seq1
M_beryllina_05_2013_comp103833_c1_seq2	CUST_36688_PI429335447	TTCAGGACCCAGAACCAGTTCCTGAACTCTGAGATCTTCCAGCTGACGGAGCTGTGGAGG	XP_003447698	ENSDART00000105344	TBC1D2	tbc1 domain family member 2a-like	GO:0032313	NA	NA	M_beryllina_05_2013_comp103833_c1_seq2
M_beryllina_05_2013_comp103834_c0_seq1	CUST_27436_PI429335447	TCTTAAAAACCAGCTCCAGAATCAAAATGCTGAATCCAAACCTCCAGCAGAGTGTGTGTC	XP_004554446	NA	NA	PREDICTED: uncharacterized protein LOC101471574 isoform X1	0	NA	NA	M_beryllina_05_2013_comp103834_c0_seq1
M_beryllina_05_2013_comp103835_c0_seq1	CUST_13885_PI429335447	AATACAACTTCAATCATCCTGGATTCTCTTCAGGCACCGGCCATTTCACAGCAATGGTGT	XP_003450930	ENSDART00000005625	glipr2l	golgi-associated plant pathogenesis-related protein 1	GO:0042221,GO:0005576	NA	NA	M_beryllina_05_2013_comp103835_c0_seq1
M_beryllina_05_2013_comp103838_c0_seq1	CUST_5899_PI429335447	CTCAAAGAAAGCCAGAAGTTCAGAAAAAGCCTACAACAAAACGACTTGTTCTGGGAAACA	XP_003449919	ENSDART00000048537	cep57l1	centrosomal protein cep57l1-like	GO:0034453,GO:0043015,GO:0042802,GO:0008017,GO:0045298	NA	NA	M_beryllina_05_2013_comp103838_c0_seq1
M_beryllina_05_2013_comp103842_c0_seq2	CUST_36610_PI429335447	TCAGTTCATAGAAAACGAGGACAACTCAACTGAAGGAGCCCAGGAAGAGGAGCAGCAGGA	XP_003449494	ENSDART00000016211	tbp	tata box binding protein	GO:0007369,GO:0003677,GO:0006402,GO:0006366	NA	NA	M_beryllina_05_2013_comp103842_c0_seq2
M_beryllina_05_2013_comp103842_c0_seq3	CUST_36613_PI429335447	GTCTTTAGGTCCCTGGTTCTCTGGGTCTTTAGGTCCTCTGGGTCTGTGGTTCCTGGGTCT	DAA06036	ENSDART00000051527	tbpl2	tata box-binding protein 2	GO:0007369,GO:0009880,GO:0044212,GO:0030097,GO:0006402,GO:0006352,GO:0006366	NA	NA	M_beryllina_05_2013_comp103842_c0_seq3
M_beryllina_05_2013_comp103849_c0_seq1	CUST_10372_PI429335447	ATCTTTGGTCCAGAATCTTCTTCAAACGTAAATGACTCAGAGAGGACCGCTGGCCAAAAG	XP_003441329	ENSDART00000129972	rad18	e3 ubiquitin-protein ligase rad18-like	GO:0003677,GO:0008270,GO:0006281	NA	NA	M_beryllina_05_2013_comp103849_c0_seq1
M_beryllina_05_2013_comp103852_c0_seq5	CUST_24097_PI429335447	CTCAGACAGAAGAAAATCCAGTCAGTCGTCAAAAGCAGCAGACGAGTGGATTTTGACTGA	XP_003438709	ENSDART00000114732	ICT1	peptidyl-trna hydrolase mitochondrial-like	GO:0070126,GO:0005762,GO:0004045,GO:0016150,GO:0006444,GO:0006449,GO:0018444	NA	NA	M_beryllina_05_2013_comp103852_c0_seq5
M_beryllina_05_2013_comp103854_c0_seq6	CUST_31354_PI429335447	TGAACTCTTTCGTAAAATCGAGCTTCCAGAGGTGCTGATGTGGTCCAAAGAGCAGAATGA	XP_003455579	ENSDART00000139947	rapgef1a	rap guanine nucleotide exchange factor 1-like	0	NA	NA	M_beryllina_05_2013_comp103854_c0_seq6
M_beryllina_05_2013_comp103855_c0_seq9	CUST_42973_PI429335447	TTTTTATTTCCATCACTTTGGCTTTGGGTAGCTGTGGGGATAGATCGTTACATATGTCCT	XP_004539316	ENSDART00000065139	gfi1ab	zinc finger protein gfi-1-like	GO:0007422	NA	NA	M_beryllina_05_2013_comp103855_c0_seq9
M_beryllina_05_2013_comp103858_c1_seq2	CUST_22039_PI429335447	GCATCTGCAAATGAAACATCTCAGGATACAGAGGGTGAGAAAGCCAAAAAGGAGGACTAA	XP_004560078	NA	NA	neurofilament heavy polypeptide-like isoform x1	0	NA	NA	M_beryllina_05_2013_comp103858_c1_seq2
M_beryllina_05_2013_comp103865_c1_seq3	CUST_17125_PI429335447	GAATATGATGATGAGAGTTATGAAGCCCATGAAGATAATTACAGCAGTCAGTCAAAGAGG	XP_003441180	ENSDART00000101134	khdrbs2	kh domain- rna- signal transduction-associated protein 2-like	GO:0003723,GO:0005634,GO:0006355	NA	NA	M_beryllina_05_2013_comp103865_c1_seq3
M_beryllina_05_2013_comp103866_c2_seq5	CUST_27901_PI429335447	GCCGCCGACGGAGGCCGACCCCAGAGGGACAGGGGTCGGGGGGGCTGGGGGCCTGGAGGA	XP_004572452	ENSDART00000025131	wdr33	pre-mrna 3 end processing protein wdr33-like	0	NA	NA	M_beryllina_05_2013_comp103866_c2_seq5
M_beryllina_05_2013_comp103868_c0_seq6	CUST_20200_PI429335447	ACACATTCTACTGAAGAAGACATTAACAAGCAGATAAACGATAAGGAGCGAGTGGCCGCC	XP_003967251	ENSDART00000073734	fam96b	mip18 family protein fam96a-like	GO:0003674,GO:0008150,GO:0005575	NA	NA	M_beryllina_05_2013_comp103868_c0_seq6
M_beryllina_05_2013_comp103869_c0_seq1	CUST_40846_PI429335447	AAGAGCACCCAAACTGTACTGCCCTATATTCCAACCAAACAGAAAACAAAGGACCACTGA	XP_004539677	ENSDART00000014582	C18H15orf59	upf0583 protein c15orf59 homolog	GO:0003674,GO:0008150,GO:0005575	NA	NA	M_beryllina_05_2013_comp103869_c0_seq1
M_beryllina_05_2013_comp103870_c0_seq1	CUST_34936_PI429335447	TTGAGGATTTCAGAGTTCGAAGATCCTCATCCACAAGGAAACGGCTCACCAAAGTTTTAA	XP_004563301	NA	NA	sodium hydrogen exchanger 2-like	0	NA	NA	M_beryllina_05_2013_comp103870_c0_seq1
M_beryllina_05_2013_comp103871_c0_seq2	CUST_27313_PI429335447	AATTACACAAGCACCAGTGCCTACACCAATTTGGACCCCAGCAATATGACGGGAGAAAAT	XP_004540457	NA	NA	PREDICTED: uncharacterized protein LOC101468436	0	NA	NA	M_beryllina_05_2013_comp103871_c0_seq2
M_beryllina_05_2013_comp103872_c0_seq1	CUST_34426_PI429335447	AGCAGATTCTTCCTCGACATCCTGTTTGTTTCTGCTCTTATTGCCGTGGCTCTATCGTTT	XP_004539763	ENSDART00000101758	sdr42e1	short-chain dehydrogenase reductase family 42e member 2-like	GO:0006694,GO:0016021,GO:0000166,GO:0055114,GO:0003854,GO:0008207,GO:0008209,GO:0008210	NA	NA	M_beryllina_05_2013_comp103872_c0_seq1
M_beryllina_05_2013_comp103881_c0_seq1	CUST_5797_PI429335447	AGAGGAGGTGTTGGCTCTTTTCAACAAGAAGGTCAACAAAAATCCAAAATTTAGAGTTTT	CBN81099	ENSDART00000031661	LYAR	cell growth-regulating nucleolar protein	GO:0005575	NA	NA	M_beryllina_05_2013_comp103881_c0_seq1
M_beryllina_05_2013_comp103882_c0_seq7	CUST_39766_PI429335447	ATTATGTGGAACGGTCTCTACACTGCAGAAAAGGTCATCATCCAGTGGACTCTGCTTAGT	XP_004567775	ENSDART00000014726	tp53i11b	tumor protein p53-inducible protein 11-like	GO:0003674,GO:0008150,GO:0005575	NA	NA	M_beryllina_05_2013_comp103882_c0_seq7
M_beryllina_05_2013_comp103885_c0_seq1	CUST_23755_PI429335447	ACTATCTTCAGAAAATGGAATGGAGAGAAGCTGTCTTTCACCAAGAACTGGGGAGAAGGA	XP_003975447	ENSDART00000003035	amy2a	pancreatic alpha-amylase	0	NA	NA	M_beryllina_05_2013_comp103885_c0_seq1
M_beryllina_05_2013_comp103885_c0_seq8	CUST_23758_PI429335447	CTTCTTGCCTGATGGAAATGCTGTGGTCTTTATTGATAACCATGACAACCAGAGGGGTCA	CAC87127	ENSDART00000003035	amy2a	pancreatic alpha-amylase-like isoform 1	GO:0016798,GO:0005975,GO:0043169	NA	NA	M_beryllina_05_2013_comp103885_c0_seq8
M_beryllina_05_2013_comp103887_c0_seq1	CUST_35479_PI429335447	GTCAAAAAGATGAATGAAAAGTACCAGACCGTCCTAAAGCAGGCCATGATGCTGGCTTTG	XP_004546627	ENSDART00000115055	SPAG16	sperm-associated antigen 16	0	NA	NA	M_beryllina_05_2013_comp103887_c0_seq1
M_beryllina_05_2013_comp103889_c0_seq1	CUST_11437_PI429335447	AAGGTCATTTCGGTCCAATCAATTGTGTGGCTTTCCATCCTGACGGAAAGAGTTACAGCA	XP_003443814	ENSDART00000005119	eif3i	eukaryotic translation initiation factor 3 subunit i	GO:0005852,GO:0016282,GO:0033290,GO:0006446,GO:0001731,GO:0003743,GO:0005840	NA	NA	M_beryllina_05_2013_comp103889_c0_seq1
M_beryllina_05_2013_comp103890_c0_seq2	CUST_18769_PI429335447	ACTACTTCTGAGCCTCATGGTTCCATGGGAGAATACCTGTTTGATAAACACACCCTGTAA	CBN81347	ENSDART00000009687	zgc:56095	lower subunit	GO:0006879,GO:0016491,GO:0008199,GO:0006826,GO:0055114	NA	NA	M_beryllina_05_2013_comp103890_c0_seq2
M_beryllina_05_2013_comp103891_c0_seq2	CUST_30712_PI429335447	AAGTTCCTGTCAGCCATTTTTGTCAACTCCCAGAACAAGAACAATGGGGTTTTCAACCCC	XP_004070500	ENSDART00000059974	wnt10b	protein wnt-10b-like	GO:0060070,GO:0048641,GO:0048741,GO:0030917,GO:0008585,GO:0005615,GO:0030858,GO:0051885,GO:0030501,GO:0043586,GO:0008284,GO:0005578,GO:0014835,GO:0060346,GO:0007224,GO:0009798,GO:0050680,GO:0001664,GO:0045669,GO:0005886,GO:0045599,GO:0071425,GO:0042487	NA	NA	M_beryllina_05_2013_comp103891_c0_seq2
M_beryllina_05_2013_comp103892_c0_seq2	CUST_10915_PI429335447	GTCATATGCAGAATTCTCGATACAGCTGATGAACATGGACTTCTTTCAATTTCCAGTTAG	XP_004077255	ENSDART00000100134	erlec1	endoplasmic reticulum lectin 1-like	0	NA	NA	M_beryllina_05_2013_comp103892_c0_seq2
M_beryllina_05_2013_comp103896_c0_seq2	CUST_40063_PI429335447	TTTCAAAAAGTAAAGCTCAAGGAACGCCAGGAGGCAGAGAAGATGTTCAAAGGCAAACGA	XP_004568757	ENSDART00000128530	snrpa1	u2 small nuclear ribonucleoprotein a	GO:0003676,GO:0030529	NA	NA	M_beryllina_05_2013_comp103896_c0_seq2
M_beryllina_05_2013_comp103899_c0_seq3	CUST_3745_PI429335447	TTTGACATTACAGATGCCATGGTCCCCCACGGGGAAAATGTGACATTCTTCTGCAAACAT	XP_004550756	ENSDART00000127905	ntd5	beta-2-glycoprotein 1-like	GO:0030414,GO:0005576	NA	NA	M_beryllina_05_2013_comp103899_c0_seq3
M_beryllina_05_2013_comp103901_c0_seq1	CUST_25810_PI429335447	AAAGACTTTGTCCCTTACACCACCAGGATTTACAACCTCTTTCAGTCCTTCGGTGGGAAT	XP_003454676	NA	NA	PREDICTED: hypothetical protein LOC100690948	0	NA	NA	M_beryllina_05_2013_comp103901_c0_seq1
M_beryllina_05_2013_comp103904_c0_seq1	CUST_21811_PI429335447	TCTGAACCTTGACACTGTTTATTACTTCAGGATTCAGGCCAAGAATGCCAAAGGAGTCGG	XP_004562006	ENSDART00000126752	NA	netrin receptor dcc-like	GO:0016358,GO:0001841,GO:0038006,GO:0007155,GO:0001756,GO:0016021,GO:0033564,GO:0048665	NA	NA	M_beryllina_05_2013_comp103904_c0_seq1
M_beryllina_05_2013_comp103913_c0_seq1	CUST_16969_PI429335447	AGAAAGAGTGTGTGCCCAGTGAAATCATTGACATTTGGCAGTATGAGGAGGACACCAAAC	XP_004557750	ENSDART00000099787	klhl41a	kelch repeat and btb domain-containing protein 10-like	0	NA	NA	M_beryllina_05_2013_comp103913_c0_seq1
M_beryllina_05_2013_comp103916_c1_seq1	CUST_40408_PI429335447	GAACAGCTTATAAAGGATTATGAACGCTCACTTCGACAGCTCAGCCTCGATGACATTGAG	ACO08301	ENSDART00000013870	UBL4A	ubiquitin-like protein 4a	GO:0071818,GO:0006810,GO:0016020,GO:0071816	NA	NA	M_beryllina_05_2013_comp103916_c1_seq1
M_beryllina_05_2013_comp103925_c0_seq1	CUST_3790_PI429335447	GTCAAGTACCAGTTCTTCAGTGTCAGCGGTGATGCAAAGATTGTGGGAATCAAGATCAAG	ACQ58895	ENSDART00000149414	lgals2b	beta-galactoside-binding lectin	GO:0016936,GO:0002040	NA	NA	M_beryllina_05_2013_comp103925_c0_seq1
M_beryllina_05_2013_comp103927_c0_seq1	CUST_41935_PI429335447	ACGTATTTCTACAACACAGAAACAGGAGAGTCCAGCTGGGAGAAACCGGCAGATTTTCTT	XP_004571287	ENSDART00000046076	CU929230.1	ww domain-binding protein 4-like	GO:0046872	NA	NA	M_beryllina_05_2013_comp103927_c0_seq1
M_beryllina_05_2013_comp103928_c0_seq1	CUST_40120_PI429335447	ACTGGATGAACATCAACCTGAGAGAAGTCATCTGCACCTCAAGGGATGGAGATAAGTTCT	CAC33027	ENSDART00000037824	lsm4	u6 snrna-associated sm-like protein lsm4-like	GO:0003674,GO:0003676,GO:0030529	NA	NA	M_beryllina_05_2013_comp103928_c0_seq1
M_beryllina_05_2013_comp103933_c0_seq1	CUST_22267_PI429335447	GCGGGGCACAACAGCAAGTCCCGGAGGCCGTACATTTTAAAACGGAGCCCGATTTACTGA	XP_004564506	ENSDART00000080638	nts	neurotensin neuromedin n-like	GO:0005576,GO:0005184,GO:0007218	NA	NA	M_beryllina_05_2013_comp103933_c0_seq1
M_beryllina_05_2013_comp103934_c1_seq1	CUST_5641_PI429335447	TTCAGACCATCAGTGCGGTGGATAAAGACGAACCTCTGAACGGACATCGTTTTTATTTCG	XP_003439195	ENSDART00000128466	cdh7	cdh7 protein	GO:0007156,GO:0005886,GO:0005509,GO:0048840,GO:0016021,GO:0060034	NA	NA	M_beryllina_05_2013_comp103934_c1_seq1
M_beryllina_05_2013_comp103936_c0_seq3	CUST_2692_PI429335447	AAAGAGCTTCAAACTATACCTGCTCTGAAGGAGCACCTGAAGTCTCACTTTTCCAAATAA	XP_004549568	ENSDART00000029252	aptx	aprataxin-like isoform 1	GO:0005730,GO:0005654,GO:0003677,GO:0016787,GO:0008270,GO:0006281	NA	NA	M_beryllina_05_2013_comp103936_c0_seq3
M_beryllina_05_2013_comp103937_c1_seq4	CUST_8713_PI429335447	CTGAATTTTTACAAGTCTGAAATTAACAAAGAGGAGATGTACATCCGCTACATCCACAAA	XP_004559071	ENSDART00000092090	dock3	dedicator of cytokinesis protein 3-like	GO:0005085,GO:0007264,GO:0043087	NA	NA	M_beryllina_05_2013_comp103937_c1_seq4
M_beryllina_05_2013_comp103940_c0_seq1	CUST_39040_PI429335447	TGTCTTCATGCTCTTCAGTGGTCAGGGAAGCCTGTTGCTGCCCTTTATTTATTACCGATT	XP_003443399	ENSDART00000060577	tmem33	transmembrane protein 33	GO:0016021	NA	NA	M_beryllina_05_2013_comp103940_c0_seq1
M_beryllina_05_2013_comp103944_c0_seq1	CUST_32338_PI429335447	ATTTTTAATATCGGAGTTCGAATTCAAGACCAACGCCGGAGGCACAAGCACTCCAGCAAA	XP_004555236	ENSDART00000110038	CU915267.1	rho gtpase-activating protein 31-like	GO:0035091,GO:0007154,GO:0007165,GO:0005622	NA	NA	M_beryllina_05_2013_comp103944_c0_seq1
M_beryllina_05_2013_comp103945_c0_seq1	CUST_17113_PI429335447	CCATTATTTCTTCGGGCCTGGAACACCTTCACCTGGACCACAACAAGATCAAAAGTGTAA	XP_004083109	ENSDART00000079521	kera	keratocan-like isoform x1	GO:0005201,GO:0005578	NA	NA	M_beryllina_05_2013_comp103945_c0_seq1
M_beryllina_05_2013_comp103950_c0_seq4	CUST_1876_PI429335447	AAAGGAGAAGTCAGATGAGAATGATTCCTTGAAGTATGTCCCTGGAAAGGCCAGATCCCA	XP_004085042	NA	NA	alpha-n-acetylgalactosaminide alpha- -sialyltransferase 1-like	0	NA	NA	M_beryllina_05_2013_comp103950_c0_seq4
M_beryllina_05_2013_comp103953_c0_seq2	CUST_33904_PI429335447	CAAGCCCTGGCCTATCTCCATTCACAGGGAGTCATTCACAGAGACATAAAGAGTGACTCC	XP_004540867	ENSDART00000103775	PAK6 (1 of 2)	serine threonine-protein kinase pak 6-like	GO:0006468,GO:0005524,GO:0004674,GO:0009069	NA	NA	M_beryllina_05_2013_comp103953_c0_seq2
M_beryllina_05_2013_comp103954_c0_seq4	CUST_35341_PI429335447	TTAAATTACTGCATTCCTATGGGAGTCCAGAGTGGAGACAGGTATTGGTTGTTTGGTGTG	XP_003455471	ENSDART00000104420	samm50	sorting and assembly machinery component 50 homolog a-like	GO:0016021,GO:0005741	NA	NA	M_beryllina_05_2013_comp103954_c0_seq4
M_beryllina_05_2013_comp103957_c0_seq2	CUST_19141_PI429335447	TGGACAGCCACCTTAACTGGAGCTCTGAGAGAGCACCAGCTCAAAGAACAGCCCAAATGA	XP_004072741	ENSDART00000144995	MFSD3	major facilitator superfamily domain-containing protein 3-like	GO:0055085,GO:0016021	NA	NA	M_beryllina_05_2013_comp103957_c0_seq2
M_beryllina_05_2013_comp103965_c1_seq1	CUST_27466_PI429335447	AAAGAAATTCCCCAAGCTTGGTCTTCAGTCCTTTCCAGAGAAAACGTTTGGACCCTCTCA	XP_004538287	ENSDART00000136182	CCDC74B	PREDICTED: uncharacterized protein LOC101472477	0	NA	NA	M_beryllina_05_2013_comp103965_c1_seq1
M_beryllina_05_2013_comp103968_c0_seq2	CUST_39157_PI429335447	TAAGGTTACCATCATAATCTACCTCTCCATTTTGGGCCTCCTGCTGCTCTACATGGTCTA	XP_003442337	ENSDART00000028887	tmem9b	transmembrane protein 9b precursor	GO:0016021	NA	NA	M_beryllina_05_2013_comp103968_c0_seq2
M_beryllina_05_2013_comp103970_c0_seq1	CUST_12985_PI429335447	AACACCGACGGAAAGAAAGAATTCATCTCCACTATGGAAGCCTACAGATACCCGTTCTAC	XP_003447738	ENSDART00000106142	zgc:171566	gamma-glutamyl hydrolase-like	GO:0006541,GO:0034722,GO:0006760	NA	NA	M_beryllina_05_2013_comp103970_c0_seq1
M_beryllina_05_2013_comp103971_c1_seq1	CUST_4897_PI429335447	GATTTCTTCATTATTACAGAGGGAATAGCCTCTGTTCTGCAGCGCAGGTCTGATAACGAG	XP_004071482	ENSDART00000091513	prkar1b	camp-dependent protein kinase type i-alpha regulatory subunit-like	GO:0045859,GO:0016301,GO:0007165,GO:0008603,GO:0005952	NA	NA	M_beryllina_05_2013_comp103971_c1_seq1
M_beryllina_05_2013_comp103973_c2_seq8	CUST_5338_PI429335447	TTTGCCAACGGGATCTTCCAGCTGTGGTTCCACTTTAAGAGGTATCGCTACAGAAGGTGA	XP_004542534	ENSDART00000083710	cactin	catin_danre ame: full=cactin short=zcactin	GO:0003407	NA	NA	M_beryllina_05_2013_comp103973_c2_seq8
M_beryllina_05_2013_comp103975_c1_seq1	CUST_22195_PI429335447	ACTGGAAAAAATGCTTAATCAGCTGCATCTTGCAGGATCTAGCAGGAAGAAAGCCATGGG	XP_004078217	ENSDART00000091661	si:dkey-14o18.2	neuronal pentraxin-1-like	GO:0048168,GO:0042752	NA	NA	M_beryllina_05_2013_comp103975_c1_seq1
M_beryllina_05_2013_comp103977_c0_seq2	CUST_22822_PI429335447	AAACCTGGGGATTCTCCACGTGACGAAGAAGAACGTGGCGAAGACTCTGGAGGAGCGGAT	XP_004084593	ENSDART00000078289	nfkb2	nuclear factor nf-kappa-b p100 subunit	GO:0003700,GO:0007165,GO:0006355,GO:0005667,GO:0045449	NA	NA	M_beryllina_05_2013_comp103977_c0_seq2
M_beryllina_05_2013_comp103979_c1_seq5	CUST_40321_PI429335447	ATGAAAGTTTCAGATTCCAACACCACTTCGCTGTCTTCACAGTTCAGCCGTGAGTTTGGA	XP_003442822	ENSDART00000092073	ubap2	ubiquitin-associated protein 2-like	GO:0003674,GO:0008150,GO:0005575	NA	NA	M_beryllina_05_2013_comp103979_c1_seq5
M_beryllina_05_2013_comp103987_c0_seq4	CUST_29707_PI429335447	TCCACGAGGCCATTCAGGAATGCAAGGGCGAGGCCTCCTTCACTGCTGATAACGGATACT	XP_001921419	ENSDART00000112053	fam89a	protein fam89a-like	0	NA	NA	M_beryllina_05_2013_comp103987_c0_seq4
M_beryllina_05_2013_comp103989_c1_seq8	CUST_36490_PI429335447	GATAACCTGGAAGAGGTGTGTATGGCTGGATTATTCACAATGCAGCATTTTTTAACCTAA	XP_004078161	ENSDART00000132329	stx17	syntaxin-17-like isoform x1	GO:0005484,GO:0031201,GO:0006887,GO:0006886,GO:0000149	NA	NA	M_beryllina_05_2013_comp103989_c1_seq8
M_beryllina_05_2013_comp103998_c0_seq1	CUST_7831_PI429335447	AGTCAGAGAAAACTGAAACGAATCCTCAGGCTTCTGTCTCAACTAGGACTGAGAGCGAAA	XP_004075847	ENSDART00000128885	cwf19l2	cwf19-like protein 2-like	GO:0003824	NA	NA	M_beryllina_05_2013_comp103998_c0_seq1
M_beryllina_05_2013_comp104000_c0_seq2	CUST_13807_PI429335447	ATCAAACTGAGTGAGATGGGGCTCCAGTTCCAGCTGTCAGTGCTGGGGGAGAGTTTCAGC	XP_004574481	ENSDART00000024572	gtdc1	glycosyltransferase-like domain-containing protein 1-like	GO:0016757,GO:0009058	NA	NA	M_beryllina_05_2013_comp104000_c0_seq2
M_beryllina_05_2013_comp104002_c1_seq1	CUST_19105_PI429335447	CAAGATCTGAAATGTCTCGTCTTCAGTCTGATTGGCCTTCACTTCAAGATCAAGCCTATC	ACQ58599	ENSDART00000056405	magoh	mago nashi homolog	GO:0003723,GO:0006417,GO:0016607,GO:0008380,GO:0006397,GO:0005737,GO:0000184,GO:0051028	NA	NA	M_beryllina_05_2013_comp104002_c1_seq1
M_beryllina_05_2013_comp104005_c0_seq3	CUST_37087_PI429335447	TGGTATGATGAGGTATGCCGCAGTCTCAAAAAGTACATCTGTGAATATGTCATTCCTTGA	XP_004543193	ENSDART00000084118	CLEC3A	tetranectin-like	GO:0030246	NA	NA	M_beryllina_05_2013_comp104005_c0_seq3
M_beryllina_05_2013_comp104007_c0_seq1	CUST_40735_PI429335447	GGCAAGGAGTGGAGGGCCACGCCCGTCTCAGACACGCCCCTATTGGCCACGCCCCTATGA	XP_004078928	ENSDART00000079790	C2H7orf25	upf0415 protein c7orf25 homolog	GO:0003674,GO:0008150,GO:0005575	NA	NA	M_beryllina_05_2013_comp104007_c0_seq1
M_beryllina_05_2013_comp104008_c1_seq1	CUST_13366_PI429335447	AAACGGGCCAAAGAGCTGAAGAGCAAGTCTCAGCACCTGAACAACGTCCTGATGACTCTG	XP_003454320	ENSDART00000131235	GMEB2 (2 of 2)	glucocorticoid modulatory element-binding protein 2-like	GO:0003713,GO:0003677,GO:0005667,GO:0045941	NA	NA	M_beryllina_05_2013_comp104008_c1_seq1
M_beryllina_05_2013_comp104015_c1_seq9	CUST_9667_PI429335447	TCTGAAACGGTTCCCCAAAGAGCTGAGGGTCCACGTCAGGAGAACCCCCAGAGAGGGGGT	XP_004572212	ENSDART00000014956	polr3glb	dna-directed rna polymerase iii subunit rpc7-like	GO:0003674,GO:0008150,GO:0005575,GO:0003899,GO:0032774	NA	NA	M_beryllina_05_2013_comp104015_c1_seq9
M_beryllina_05_2013_comp104018_c0_seq4	CUST_7624_PI429335447	ACTCTGTCCTCCTTCTCTCCTCAGGACTGCTGGCGTCCCTACAGAGCGCGCTCAGTAACC	XP_003457642	ENSDART00000115123	CRTC2	creb-regulated transcription coactivator 2-like	GO:0032793,GO:0051289,GO:0005737,GO:0008140,GO:0005667,GO:0045941	NA	NA	M_beryllina_05_2013_comp104018_c0_seq4
M_beryllina_05_2013_comp104019_c0_seq2	CUST_2674_PI429335447	GAAGGCCCAAAAAACATGTGCAACCAAAGCAGACAGCTGTCCATAAACTGCCCAGAAAAT	ACQ58260	ENSDART00000026239	eif2b4	translation initiation factor eif-2b subunit alpha	GO:0019509,GO:0003743,GO:0005851,GO:0005085,GO:0045947,GO:0046523,GO:0005840,GO:0043087	NA	NA	M_beryllina_05_2013_comp104019_c0_seq2
M_beryllina_05_2013_comp104028_c0_seq6	CUST_5320_PI429335447	ATCGCCAGAAACAGGAAAAATATTTGTGGCATTGCAACTTTTGCAGTTTACCCTACACTG	XP_003444155	ENSDART00000053638	ctssa	cathepsin k-like	GO:0008234,GO:0006508	NA	NA	M_beryllina_05_2013_comp104028_c0_seq6
M_beryllina_05_2013_comp104030_c0_seq1	CUST_40852_PI429335447	ATTACGCCTTATAATGCGGCTGACAACGAAACCTTCAAGACAATGGTGCAGTTTGAGTGC	XP_003453411	ENSDART00000092479	C2H1orf123	upf0587 protein c1orf123 homolog	0	NA	NA	M_beryllina_05_2013_comp104030_c0_seq1
M_beryllina_05_2013_comp104032_c0_seq2	CUST_5344_PI429335447	TTCAAGTACAAAAGGAGTGAGGTCGGTTACATTCAAGGCTACAAGAGACGTTTCTGGCAC	XP_004542132	ENSDART00000103330	chac1	cation transport regulator-like protein 1	GO:0005829,GO:0006915,GO:0022008,GO:0010955,GO:0005112,GO:0005802,GO:0045746,GO:0006986,GO:0005794	NA	NA	M_beryllina_05_2013_comp104032_c0_seq2
M_beryllina_05_2013_comp104034_c0_seq1	CUST_10_PI429335447	TTCTACTACGAGATCCTCAACTCTCCCGATAAAGCCTGCGAGTTGGCTAAAAAGGCATTT	XP_004082313	ENSDART00000018423	ywhaqb	14-3-3 protein beta alpha	GO:0004497,GO:0005737,GO:0019904	NA	NA	M_beryllina_05_2013_comp104034_c0_seq1
M_beryllina_05_2013_comp104035_c0_seq1	CUST_9706_PI429335447	TTCTACCTGTGCTCGTGTTAATCCTCATATCAGTGTTCACTCAGATGATGGCCACTAACC	XP_004564090	ENSDART00000101054	dnajc18	dnaj homolog subfamily b member 14-like	GO:0005575	NA	NA	M_beryllina_05_2013_comp104035_c0_seq1
M_beryllina_05_2013_comp104037_c1_seq1	CUST_7612_PI429335447	AGTACAGAGTATGATCGACTGCTGTTTGTGATCAACGCCATCAAGGAGGAGATCATGATG	XP_003447067	ENSDART00000127910	crebrf	creb3 regulatory factor-like	0	NA	NA	M_beryllina_05_2013_comp104037_c1_seq1
M_beryllina_05_2013_comp104039_c0_seq2	CUST_39268_PI429335447	TCTTCAACCACTCTATCCCCTTTAGACAAGGTGGTCACAGTATCTTTAGCAGTTCAGGAG	XP_004557613	ENSDART00000114402	tnrc6b	trinucleotide repeat-containing gene 6b	0	NA	NA	M_beryllina_05_2013_comp104039_c0_seq2
M_beryllina_05_2013_comp104046_c0_seq2	CUST_20782_PI429335447	AAGAACTACATCTTTCTGAGGAACGCTGCCGAAGAGCTGAAACCTCGGAACAAGAAATGA	CBN81041	ENSDART00000020333	rae1	mrna export factor	GO:0005634,GO:0005737	NA	NA	M_beryllina_05_2013_comp104046_c0_seq2
M_beryllina_05_2013_comp104049_c0_seq7	CUST_38911_PI429335447	ACTACATCCTAACCCCTGTGGTGATGGGAATGACACTGACCCAGTTCAAAATCAACGTAA	XP_003441420	ENSDART00000065996	tmem183a	transmembrane protein 183-like	GO:0003674,GO:0008150,GO:0005575	NA	NA	M_beryllina_05_2013_comp104049_c0_seq7
M_beryllina_05_2013_comp104050_c0_seq2	CUST_10948_PI429335447	TTGCTGACTATGAGTGTGGAAGGGCAATACCCAACAATCAGGTGATGGGCAAAATTGAGA	XP_003965216	ENSDART00000015940	edf1	endothelial differentiation-related factor 1 homolog	GO:0043565	NA	NA	M_beryllina_05_2013_comp104050_c0_seq2
M_beryllina_05_2013_comp104053_c0_seq1	CUST_31726_PI429335447	ATGTCAACAGCCCCCATGAGCCCAATCATTGTGAGGGCTGTAAGTTAGGAATCTGTAAAA	XP_004067938	NA	NA	receptor-transporting protein 3	0	NA	NA	M_beryllina_05_2013_comp104053_c0_seq1
M_beryllina_05_2013_comp104057_c0_seq1	CUST_32233_PI429335447	AATGATGAGGCAGAAGGGGGTGATGAGGAGGAAGAAGGACAGGGAGTAGAAGCTACTGAT	XP_004571463	NA	NA	retrotransposon-like protein 1-like isoform x2	0	NA	NA	M_beryllina_05_2013_comp104057_c0_seq1
M_beryllina_05_2013_comp104058_c0_seq2	CUST_9463_PI429335447	AATGCCAAACTGCTGCATGACTTTCTCCATAATGTTACTGATGTGCCTGCTCCTGTACAG	ACO52467	ENSDART00000015780	ercc4	dna repair endonuclease xpf	GO:0000712,GO:0000014,GO:0000724,GO:0003697,GO:0006296,GO:0000110,GO:0000710,GO:0006308	NA	NA	M_beryllina_05_2013_comp104058_c0_seq2
M_beryllina_05_2013_comp104060_c0_seq3	CUST_4906_PI429335447	TTTGACTCCGGTGACTACAACATGGCTAAAGCGAAGATAAAGAACAAACAACTGCCGACC	XP_004539666	ENSDART00000041597	arpp19a	---NA---	0	NA	NA	M_beryllina_05_2013_comp104060_c0_seq3
M_beryllina_05_2013_comp104064_c0_seq2	CUST_22915_PI429335447	TTCTTTCGAAGAAGCCCACTACGACCAATATGACTATTACAACCTGAACGAGTACTCGGG	XP_004557497	ENSDART00000141714	nupr1	nuclear protein 1	GO:0050896	NA	NA	M_beryllina_05_2013_comp104064_c0_seq2
M_beryllina_05_2013_comp104065_c0_seq1	CUST_994_PI429335447	AAAGTGCTCAAAGGCGTACATTCACACACGTATGAGAGCTAAGACGTCGGACTTCCTAAA	XP_003458127	ENSDART00000099803	arpc2	actin-related protein 2 3 complex subunit 2-like	GO:0005856,GO:0030833	NA	NA	M_beryllina_05_2013_comp104065_c0_seq1
M_beryllina_05_2013_comp104068_c1_seq2	CUST_38446_PI429335447	TGCTGCATTTGTGATTGGTGTCAGTATGATGGGGGCGTTGTGGTGCATCTATAATTACAC	XP_004562990	ENSDART00000125008	TGFBR3L	transforming growth factor beta receptor type 3-like	0	NA	NA	M_beryllina_05_2013_comp104068_c1_seq2
M_beryllina_05_2013_comp104069_c0_seq2	CUST_14092_PI429335447	CGTCTACACTGATATTTCTAAATACTTACCCTGGATCAAAAGAATTGTCAAGCAAAAGCA	XP_004559103	ENSDART00000105486	BX936298.1	granzyme b( )-like	GO:0008236	NA	NA	M_beryllina_05_2013_comp104069_c0_seq2
M_beryllina_05_2013_comp104070_c0_seq2	CUST_1918_PI429335447	TGATATTACTGGAGGTCTTCTTACTCTGAGTGAACTGCATGCCTTTACACTGCGAGTGGA	BAC20295	ENSDART00000115324	hbae1	alpha-type globin	GO:0015671,GO:0005344,GO:0005833,GO:0005506,GO:0020037,GO:0019825	NA	NA	M_beryllina_05_2013_comp104070_c0_seq2
M_beryllina_05_2013_comp104070_c0_seq5	CUST_22609_PI429335447	TGCCACCATGTTTCCTCAAGACTTCACCCCCGAGGTCCATGTGGCCATGGACAAGTTCCT	CAD60790	ENSDART00000115324	hbae1	novel alpha-globin	GO:0015671,GO:0005344,GO:0005833,GO:0005506,GO:0020037,GO:0019825	NA	NA	M_beryllina_05_2013_comp104070_c0_seq5
M_beryllina_05_2013_comp104076_c0_seq1	CUST_34282_PI429335447	ACAAAAGGCAAATACCAAGCAGGTTTTTTCAAGGGCCCGTCTACATGGAGATGAACAGCA	XP_004567290	NA	NA	sh2 domain-containing protein 1b	GO:0090024,GO:0044464,GO:0040037,GO:0030509	NA	NA	M_beryllina_05_2013_comp104076_c0_seq1
M_beryllina_05_2013_comp104076_c0_seq3	CUST_34279_PI429335447	ACAAAAGGCAAATACCAAGCAGGTTTTTTCAAGGGCCCGTCTACATGGAGATGAACAGCA	XP_004567290	NA	NA	sh2 domain-containing protein 1a-like isoform x2	0	NA	NA	M_beryllina_05_2013_comp104076_c0_seq3
M_beryllina_05_2013_comp104077_c0_seq1	CUST_18793_PI429335447	TTCCTGGACATGGTGGAGAACTACCCCACCAGCCTGCGGGTTCTGGTTCTGGCGGAGAAC	XP_003963975	ENSDART00000092646	LRRC73	lrr and pyd domains-containing protein 3-like	0	NA	NA	M_beryllina_05_2013_comp104077_c0_seq1
M_beryllina_05_2013_comp104079_c0_seq1	CUST_37036_PI429335447	TCAAAAAGGTCCTCTCAGCATACGCACTGAGCTCTGAAAGCTACCACTCACTTTGTAACA	XP_004557942	ENSDART00000101097	acp6	testicular acid phosphatase homolog	GO:0003993,GO:0006771,GO:0019497	NA	NA	M_beryllina_05_2013_comp104079_c0_seq1
M_beryllina_05_2013_comp104079_c0_seq6	CUST_18949_PI429335447	GGCCACCGTCCCCTGTAGAGGAAAGCTATCGAAGGAACATTCTGACTGGAGGCACGTTTC	XP_004557942	ENSDART00000101097	acp6	lysophosphatidic acid phosphatase type 6-like	GO:0003993,GO:0006771,GO:0019497	NA	NA	M_beryllina_05_2013_comp104079_c0_seq6
M_beryllina_05_2013_comp104079_c0_seq8	CUST_18946_PI429335447	TCAAAAAGGTCCTCTCAGCATACGCACTGAGCTCTGAAAGCTACCACTCACTTTGTAACA	ACI32958	ENSDART00000101097	acp6	lysophosphatidic acid phosphatase type 6	GO:0003993,GO:0006771,GO:0019497	NA	NA	M_beryllina_05_2013_comp104079_c0_seq8
M_beryllina_05_2013_comp104080_c0_seq4	CUST_5410_PI429335447	AAGGAAAGCAAAAGCAAATCCAACCATTCCGTTTGGAGTCAAACCCTCTTCAGTCTCCCT	BAM34025	ENSDART00000041770	si:dkey-25o1.9	cc chemokine 1	GO:0008009,GO:0006955,GO:0005576	NA	NA	M_beryllina_05_2013_comp104080_c0_seq4
M_beryllina_05_2013_comp104086_c0_seq1	CUST_40048_PI429335447	CGGGATGCACTACAAGGCTTCAAGATCACACAAACAAATGCTATGAAGATATCATTTGCT	XP_004543674	ENSDART00000012018	snrpa	u1 small nuclear ribonucleoprotein a	GO:0017069,GO:0000398,GO:0030529,GO:0000166	NA	NA	M_beryllina_05_2013_comp104086_c0_seq1
M_beryllina_05_2013_comp104087_c0_seq1	CUST_33634_PI429335447	AGAAAAAGGTCTCCGTCCTACAGCCCGTCCCCTGTCCGGAAGAAGAGAAAGAAGAAGAAG	XP_004566735	NA	NA	serine arginine repetitive matrix protein 4-like isoform x2	GO:0043484,GO:0003723,GO:0007409,GO:0006397	NA	NA	M_beryllina_05_2013_comp104087_c0_seq1
M_beryllina_05_2013_comp104088_c0_seq1	CUST_26272_PI429335447	TGATCTAGTGGTGTTGCAATGTGAGCCCCAGCTGTGTGATGGAATGGCGCCCCTCTGTCT	XP_694345	NA	NA	PREDICTED: hypothetical protein LOC565988	0	NA	NA	M_beryllina_05_2013_comp104088_c0_seq1
M_beryllina_05_2013_comp104089_c0_seq1	CUST_43135_PI429335447	AACCTTGGCAAAGTTGTAGTGGAAGTGAACCCACCATCTGTTAGCGGCAGCAAGCTGTGA	XP_004566863	ENSDART00000078982	vat1	zinc-binding alcohol dehydrogenase domain-containing protein 2-like	GO:0016491,GO:0055114,GO:0008270	NA	NA	M_beryllina_05_2013_comp104089_c0_seq1
M_beryllina_05_2013_comp104093_c0_seq1	CUST_17311_PI429335447	AAACTCAGTGGACACATGACTCCAAATGATAAAGCTGTTACAGATAAATATGCATATGGC	XP_003452511	ENSDART00000102211	krit1	krev interaction trapped protein 1	GO:0030054,GO:0001525,GO:0001570,GO:0001886,GO:0005856,GO:0003007,GO:0007033,GO:0005737,GO:0045602,GO:0072554,GO:0005886	NA	NA	M_beryllina_05_2013_comp104093_c0_seq1
M_beryllina_05_2013_comp104094_c1_seq2	CUST_2866_PI429335447	AAGCGCTCCTACCTGAGGGGCATCATCGGCGACGATGACGACGAGGAAGGAAACGTGTCG	BAA82259	ENSDART00000025788	saga	arrestin	GO:0007165	NA	NA	M_beryllina_05_2013_comp104094_c1_seq2
M_beryllina_05_2013_comp104094_c1_seq4	CUST_33256_PI429335447	TGGCTCCACTGATATGGTGTTTGAGGAGTTCAAGCGGGCGTACCTGAAGGGCGTGGTCTA	XP_004572615	ENSDART00000025788	saga	s-arrestin-like isoform x2	GO:0007165	NA	NA	M_beryllina_05_2013_comp104094_c1_seq4
M_beryllina_05_2013_comp104094_c1_seq5	CUST_2869_PI429335447	ACGCCAAAGTCAAAAAGAGGAGCACGGTGAAGCTGATGCTCAGGAAGGTCCAGTACGCCC	XP_003452818	ENSDART00000149079	sagb	arrestin 2	GO:0007165	NA	NA	M_beryllina_05_2013_comp104094_c1_seq5
M_beryllina_05_2013_comp104094_c1_seq6	CUST_33253_PI429335447	TTTACTCCAACGACAAATACGTCAAATCTGTGGCTATAGAGGAGACAGAGGACTCGGTTC	BAA21718	ENSDART00000149079	sagb	s-arrestin-like isoform x1	GO:0005515,GO:0035162,GO:0048368,GO:0007165	NA	NA	M_beryllina_05_2013_comp104094_c1_seq6
M_beryllina_05_2013_comp104095_c0_seq2	CUST_39004_PI429335447	TCTTCGGAAAACTACTTTGTGAGTGACAGTGTGACCAAGCAGGAGATGGACTTGATGTTG	XP_004575463	ENSDART00000129910	tmem240	transmembrane protein 240-like	0	NA	NA	M_beryllina_05_2013_comp104095_c0_seq2
M_beryllina_05_2013_comp104096_c0_seq7	CUST_10276_PI429335447	ATCATCAATAATGTCATGATTTCAAGTTCCAGTCGGACACTCATCATCATCTACACTGCA	XP_004076988	ENSDART00000020946	fancl	e3 ubiquitin-protein ligase fancl-like	GO:0043240,GO:0006281,GO:0008270,GO:0048599,GO:0004842,GO:0016567	NA	NA	M_beryllina_05_2013_comp104096_c0_seq7
M_beryllina_05_2013_comp104099_c0_seq3	CUST_27916_PI429335447	ATGGAGAAGAAAAAAGAGATGCTTTCTTCCCGAAAGTCTGCTCTGGACCGTTTCAAAAAA	XP_003438892	ENSDART00000084063	wdr46	pre-mrna-processing factor 19-like	GO:0043518,GO:0000151,GO:0016567,GO:0004842	NA	NA	M_beryllina_05_2013_comp104099_c0_seq3
M_beryllina_05_2013_comp104103_c0_seq12	CUST_10645_PI429335447	GAAACATTCAAAACAGAAGCGATGCAGGGTCTTCAAAGATATTCGGCAACATACGCACAG	XP_003455470	ENSDART00000133733	EFCAB10	ef-hand calcium-binding domain-containing protein 10-like	0	NA	NA	M_beryllina_05_2013_comp104103_c0_seq12
M_beryllina_05_2013_comp104104_c0_seq2	CUST_7270_PI429335447	AGAACCAACAGTTCATCCTTGATTCAGGACGTTGTTAGTCTAGTGAAGGGGGGAATCATG	XP_004079021	ENSDART00000147283	c8a	complement component c8 alpha chain-like	GO:0006955	NA	NA	M_beryllina_05_2013_comp104104_c0_seq2
M_beryllina_05_2013_comp104108_c0_seq1	CUST_26398_PI429335447	GCGCCTGCTCTCCTCCCTCCTGAAGCGCCGCTCGCAGTGCGACGGCGAGGACGGCGAGCG	XP_003458574	NA	NA	PREDICTED: protein 4.1	GO:0044424,GO:0008092	NA	NA	M_beryllina_05_2013_comp104108_c0_seq1
M_beryllina_05_2013_comp104108_c1_seq1	CUST_3490_PI429335447	ACCACACCTTCTTCAGGCTGACCTCCACCGAGATGGCCACCACTCCCAGGAAGTTCCTGG	XP_004573720	ENSDART00000085281	EPB41L2	band -like protein 2	GO:0005856,GO:0005737,GO:0030866,GO:0003779,GO:0005198,GO:0019898	NA	NA	M_beryllina_05_2013_comp104108_c1_seq1
M_beryllina_05_2013_comp104108_c2_seq2	CUST_3493_PI429335447	TTCTTCATCAAGATCCGACCGTCTGAGGTGGAACAGTATGAAAGTGCCATTGGCTTCAAA	XP_004074388	ENSDART00000110627	EPB41L1	band -like protein 2- partial	GO:0005856,GO:0005737,GO:0030866,GO:0003779,GO:0005198,GO:0019898	NA	NA	M_beryllina_05_2013_comp104108_c2_seq2
M_beryllina_05_2013_comp104109_c0_seq2	CUST_7138_PI429335447	TCTGCAGGAGACTACACCAGTACTTACAACTACTACAGTTTGCATCATGGATATATTTAA	AFJ38184	ENSDART00000067447	mmp30	collagenase 3 precursor	GO:0046872,GO:0008233	NA	NA	M_beryllina_05_2013_comp104109_c0_seq2
M_beryllina_05_2013_comp104115_c0_seq2	CUST_10837_PI429335447	TTATTCAGATGATCCAGTTCCATGTCACCATTGGTCATGCTGGCTACTCTCTGTACACTG	XP_004083776	ENSDART00000056328	elovl4b	elongation of very long chain fatty acids protein 4-like	GO:0016021,GO:0042761	NA	NA	M_beryllina_05_2013_comp104115_c0_seq2
M_beryllina_05_2013_comp104116_c0_seq6	CUST_38563_PI429335447	AAGAAAACGGCGTTCTCAAAGCTGAGAATGGAGTCTCACCCCGGACAAAGAAACTCAAAT	XP_003458282	ENSDART00000043938	tram2	translocating chain-associated membrane protein 2-like	GO:0016021	NA	NA	M_beryllina_05_2013_comp104116_c0_seq6
M_beryllina_05_2013_comp104122_c0_seq1	CUST_12412_PI429335447	ATGGCAGTAAGGTCGTGTCCAGGGGAGCCGGCCTGTCCAAGGCCTTCATCGGCCAGAAGA	AAH90688	ENSDART00000026492	flncb	flncb protein	GO:0042384,GO:0003779,GO:0046716	NA	NA	M_beryllina_05_2013_comp104122_c0_seq1
M_beryllina_05_2013_comp104122_c2_seq1	CUST_12343_PI429335447	ATTACGAGGTGTCCATAAAGTTCAACGACGAGCACGTCCCTGACTCCCCGTTCCTGGTGC	XP_003448846	ENSDART00000026492	flncb	filamin- partial	GO:0003779,GO:0046716	NA	NA	M_beryllina_05_2013_comp104122_c2_seq1
M_beryllina_05_2013_comp104126_c1_seq4	CUST_42223_PI429335447	ATCCCTATGCTATTCTGCCTCTTTCTGGAGCCCTTTGTTATTCAGACTCTACTGGTGGTT	XP_004541221	ENSDART00000113764	zgc:174888	zgc:174888 protein	0	NA	NA	M_beryllina_05_2013_comp104126_c1_seq4
M_beryllina_05_2013_comp104127_c0_seq6	CUST_9454_PI429335447	AGAATCACTGACAGTGGTGGAGAAGTACTTTCCACAATATGCACTAGAGGACCAGGACAT	XP_004070855	ENSDART00000104647	prim1	dna primase small subunit-like	GO:0030894,GO:0003896,GO:0006269,GO:0005730,GO:0006351	NA	NA	M_beryllina_05_2013_comp104127_c0_seq6
M_beryllina_05_2013_comp104128_c1_seq1	CUST_32941_PI429335447	CCAGAGGAGGAAGAGGCCAAAGAAGAAGACAATAGGAAGGAAGCAAGTTCTTATTTACCA	XP_003447045	ENSDART00000148928	rbm27	rna-binding protein 27-like	GO:0003723,GO:0006397,GO:0000166,GO:0008270	NA	NA	M_beryllina_05_2013_comp104128_c1_seq1
M_beryllina_05_2013_comp104130_c0_seq1	CUST_39784_PI429335447	GTTTTTCTTCAGTTTCCTGCTTTCCATCTTCAGGTCCAAGTACCATGGATATCCCTACAG	XP_004539249	ENSDART00000080864	magt1	tumor suppressor candidate 3-like	GO:0005789,GO:0015693,GO:0005886,GO:0045454,GO:0016021	NA	NA	M_beryllina_05_2013_comp104130_c0_seq1
M_beryllina_05_2013_comp104133_c1_seq6	CUST_28735_PI429335447	AGATGAAGAAAGCACATAAGGGGCACAAGCATGGGCATCATAAACATGGCAAGTCTTCCA	XP_004068723	NA	NA	proline-rich protein 13	0	NA	NA	M_beryllina_05_2013_comp104133_c1_seq6
M_beryllina_05_2013_comp104136_c1_seq1	CUST_17056_PI429335447	TTCACCTGCCCAAACCTACAGACTCTACAAGTACCCCATCACAGAATAGGTGCCGTCTAA	XP_003453531	ENSDART00000017562	klhl32	kelch-like protein 32	GO:0008150,GO:0005575	NA	NA	M_beryllina_05_2013_comp104136_c1_seq1
M_beryllina_05_2013_comp104137_c0_seq2	CUST_39748_PI429335447	TCAAGTCGATCGAGGAGAAAGTAGAGACCCTGAAGACCAAGATCACCCCCACACCCTCCC	XP_004074283	ENSDART00000088340	tpd52	tumor protein d52	0	NA	NA	M_beryllina_05_2013_comp104137_c0_seq2
M_beryllina_05_2013_comp104140_c1_seq1	CUST_17833_PI429335447	CTTCTGCTCCTTGTGATACTGTCTGTGATTCTTTGGAAATATCAGCTGTGTCAAAAGTAA	ACQ58350	ENSDART00000127161	FP245511.1	leucine-rich repeat neuronal protein 4-like	0	NA	NA	M_beryllina_05_2013_comp104140_c1_seq1
M_beryllina_05_2013_comp104143_c0_seq1	CUST_29089_PI429335447	TATAAAGGAGGGCTATGCAGACAAGAACCTGATTGCTAAGTGGAAGAAGCAGGGCTATGA	ACQ57927	ENSDART00000009411	bud31	protein bud31 homolog	GO:0005634	NA	NA	M_beryllina_05_2013_comp104143_c0_seq1
M_beryllina_05_2013_comp104146_c0_seq1	CUST_27988_PI429335447	TGGAACAACCAAAAACGTTTCAGCGAATTCCTGAAGCAATATCTGGGTATGAGCAGTCGG	XP_004067505	ENSDART00000030919	pnoca	prepronociceptin b precursor	GO:0007154,GO:0044700	NA	NA	M_beryllina_05_2013_comp104146_c0_seq1
M_beryllina_05_2013_comp104150_c1_seq2	CUST_32173_PI429335447	ATTGAGGATGGCAAGCTCCATCTGGTAAAGTCAGCAGCATATATCTCAGAATCAAATCAT	CAG07542	ENSDART00000138021	rbp7a	retinoid-binding protein 7-like	GO:0008289,GO:0006810,GO:0005215,GO:0005575	NA	NA	M_beryllina_05_2013_comp104150_c1_seq2
M_beryllina_05_2013_comp104154_c0_seq1	CUST_24100_PI429335447	AAACCGTACCCCAGAGAGGCCGTGCAGCCGCTGCTGCGCAAGTTCAAGCTCTTCAAATGA	XP_003456744	ENSDART00000015190	ptrhd1	peptidyl-trna hydrolase ptrhd1-like	GO:0004725,GO:0004045,GO:0035335,GO:0006570	NA	NA	M_beryllina_05_2013_comp104154_c0_seq1
M_beryllina_05_2013_comp104155_c2_seq2	CUST_9112_PI429335447	TTTATCAACCATTTAATCAGCGAGAAGGCCAATTACACCCTACAGATCTATCCGGATGAG	XP_003437953	ENSDART00000037848	dpp6b	dipeptidyl aminopeptidase-like protein 6-like	GO:0008236,GO:0016020,GO:0006508	NA	NA	M_beryllina_05_2013_comp104155_c2_seq2
M_beryllina_05_2013_comp104156_c0_seq1	CUST_17494_PI429335447	ACCATCGAGAGAATCAGCAGTGACGACGACGTCATCTGCACCACCGAGTACTCCCGCATA	XP_003446085	ENSDART00000045126	lama5	laminin subunit alpha-5-like	GO:0007411,GO:0030155,GO:0016337,GO:0035138,GO:0045995,GO:0005606,GO:0030334,GO:0005102,GO:0048513,GO:0035141,GO:0001568,GO:0008104,GO:0007165	NA	NA	M_beryllina_05_2013_comp104156_c0_seq1
M_beryllina_05_2013_comp104157_c1_seq9	CUST_7339_PI429335447	TGATGTTGATGGATCAATGACACTAAAACAGGAGGGACCCACATCCCTCTGCGATACTTA	XP_004563308	ENSDART00000111146	si:ch211-26b3.4	connector enhancer of kinase suppressor of ras 2-like	GO:0009966,GO:0005737,GO:0016020,GO:0005543	NA	NA	M_beryllina_05_2013_comp104157_c1_seq9
M_beryllina_05_2013_comp104160_c0_seq2	CUST_28570_PI429335447	AACACTATTCTACAAGACATTTTACCAGCGCTACAAGAATGCCTAAGACCTATGACCTAA	ACQ58852	ENSDART00000128507	ntpcr	probable upf0334 kinase-like protein c1orf57	GO:0019204,GO:0016301,GO:0016310,GO:0005524,GO:0017111	NA	NA	M_beryllina_05_2013_comp104160_c0_seq2
M_beryllina_05_2013_comp104163_c0_seq1	CUST_7588_PI429335447	AAGACCTTCCTGGTGTGGGTGAATGAGGAGGACCACCTGCGTGTGATCAGCATGCAGAAG	CAF92971	ENSDART00000027603	ckbb	creatine kinase b-type-like	GO:0005524,GO:0016310,GO:0004111,GO:0006525,GO:0006560	NA	NA	M_beryllina_05_2013_comp104163_c0_seq1
M_beryllina_05_2013_comp104163_c0_seq3	CUST_7600_PI429335447	ACCTGGACTCCTCCAAGATCACCAACGGGATGTTCGATGAGAAGTACGTGCTGTCCTCGC	XP_003965401	ENSDART00000058403	ckmt2	creatine mitochondrial 2	GO:0005524,GO:0016310,GO:0004111,GO:0006525,GO:0006560	NA	NA	M_beryllina_05_2013_comp104163_c0_seq3
M_beryllina_05_2013_comp104163_c1_seq1	CUST_7594_PI429335447	AAGCTGGAGCGGGGTCAGGACATCAAGGTCCCGGCGCCCATCTCCCAGTTCAAGAAGTGA	AAH47826	ENSDART00000101449	CKMT2 (2 of 2)	creatine kinase s- mitochondrial-like	GO:0016301,GO:0005524,GO:0016310	NA	NA	M_beryllina_05_2013_comp104163_c1_seq1
M_beryllina_05_2013_comp104163_c4_seq1	CUST_7606_PI429335447	ATGGAGAAGCGCCTGGAGGCCGGCGAGGCCATCGACGACCTGATGCCCGAGCAGAAGTGA	XP_004084819	ENSDART00000152577	ckbb	creatine testis isozyme-like	GO:0005524,GO:0016310,GO:0004111,GO:0006525,GO:0006560	NA	NA	M_beryllina_05_2013_comp104163_c4_seq1
M_beryllina_05_2013_comp104164_c0_seq11	CUST_10741_PI429335447	CTGCAGTTGATTTCCATACGACACATGTTGGCACTGAATCTGTGTGTTTCTTCAGTTCAG	XP_003440003	ENSDART00000146123	elavl1	elav-like protein 1-like isoform 2	GO:0030529,GO:0000166,GO:0003723	NA	NA	M_beryllina_05_2013_comp104164_c0_seq11
M_beryllina_05_2013_comp104164_c0_seq7	CUST_10735_PI429335447	ATTAACATCAAATTTCGGGTCGATAAAGGTTACGCAGTTCAAACTGTGCTGCCCGTGCGT	XP_003977525	ENSDART00000146123	elavl1	elav-like protein 1	GO:0003676,GO:0000166	NA	NA	M_beryllina_05_2013_comp104164_c0_seq7
M_beryllina_05_2013_comp104165_c1_seq2	CUST_13759_PI429335447	AGTCAGTGCTCTGTATAAGAATCCCAAAGAGTGGACCCAAATGGTGATCCGTAACATTGC	XP_003459758	ENSDART00000127467	pygmb	glycogen muscle form-like	GO:0030170,GO:0005975,GO:0008184	NA	NA	M_beryllina_05_2013_comp104165_c1_seq2
M_beryllina_05_2013_comp104167_c0_seq2	CUST_19522_PI429335447	TCATCTGAAGAAATCATTAAGTATGCTCACAGGATCAGCGCCAGTAACGCTGTGTGTGCT	XP_003449548	ENSDART00000128197	med4	mediator of rna polymerase ii transcription subunit 4	GO:0006357,GO:0001104,GO:0016592	NA	NA	M_beryllina_05_2013_comp104167_c0_seq2
M_beryllina_05_2013_comp104170_c0_seq1	CUST_12649_PI429335447	TTCGGCTTCGGAACTCAGGTTCTGTGGCTGTTTTCCAACAACATCACGTGGGTGGAGGCG	XP_003448038	ENSDART00000073736	rtn4rl2a	f-reticulon 4	0	NA	NA	M_beryllina_05_2013_comp104170_c0_seq1
M_beryllina_05_2013_comp104173_c0_seq2	CUST_8281_PI429335447	CCCACTCTATCAGAACTTGGGATCTCAACACCAGAAGAGCTTGGAATTGATCAATTGTAG	XP_003969483	ENSDART00000125720	cox5aa	cytochrome c oxidase subunit mitochondrial-like	GO:0005743,GO:0048568,GO:0021522,GO:0004129,GO:0006123,GO:0015992,GO:0045277	NA	NA	M_beryllina_05_2013_comp104173_c0_seq2
M_beryllina_05_2013_comp104175_c0_seq1	CUST_22306_PI429335447	ACACAGATCTCCAAGTTTGCTTCACAGGATCTTGTCCAAGTGCCGGAAAAAGAGTGAATG	XP_004546706	NA	NA	neutrophil cytosolic factor 2	GO:0007368,GO:0044458	NA	NA	M_beryllina_05_2013_comp104175_c0_seq1
M_beryllina_05_2013_comp104179_c0_seq3	CUST_26179_PI429335447	TTGCTGCTTGGAATGGGAGCAGTGGCCAACAAAAGCAGGAAGAAGATTGCGAAGTATAAA	XP_003460181	NA	NA	PREDICTED: hypothetical protein LOC100708679	0	NA	NA	M_beryllina_05_2013_comp104179_c0_seq3
M_beryllina_05_2013_comp104184_c0_seq1	CUST_9514_PI429335447	AGATCAACACCATTCGGACATTCCTTTTGGATTCTCTCAACTGCATGTACAAGCTGCGCT	ACI33704	ENSDART00000033746	gins2	dna replication complex gins protein psf2	GO:0005634,GO:0006260	NA	NA	M_beryllina_05_2013_comp104184_c0_seq1
M_beryllina_05_2013_comp104192_c0_seq2	CUST_21550_PI429335447	ATACGGTCTGGGGAAGGAGAGGAGTGTGTCGGTGGAGAACATGTCAGCGGAGCAGGTGGC	XP_004076703	ENSDART00000028960	ndufa2	nadh dehydrogenase 1 alpha subcomplex subunit 2	GO:0005743,GO:0016491,GO:0070469,GO:0022900	NA	NA	M_beryllina_05_2013_comp104192_c0_seq2
M_beryllina_05_2013_comp104195_c4_seq1	CUST_7798_PI429335447	AACGTTCCAATGAAGACGGAGCAGAAACAGGAACAAGAAACAACACACAAGAACATCGAG	AAH66480	ENSDART00000013076	cul1a	cullin 1a	GO:0009790,GO:0031625,GO:0031461,GO:0006511,GO:0001944	NA	NA	M_beryllina_05_2013_comp104195_c4_seq1
M_beryllina_05_2013_comp104196_c0_seq7	CUST_28285_PI429335447	ACTTCTGTTGGCACGACTAGAGCACTTAAGGAAGAGGATTGATGGTTCAAACTCCACCTT	CAG11730	ENSDART00000128379	GPR112 (1 of 2)	probable g-protein coupled receptor 112-like	0	NA	NA	M_beryllina_05_2013_comp104196_c0_seq7
M_beryllina_05_2013_comp104197_c0_seq5	CUST_7234_PI429335447	ACTTCCAATACAATTACATTCTCAGGAGTCCTGCTTGTACGTGAGGGCGTTTCCATGTTG	XP_003199670	NA	NA	complement c1q-like protein 4 precursor	GO:0003674,GO:0008150,GO:0005575	NA	NA	M_beryllina_05_2013_comp104197_c0_seq5
M_beryllina_05_2013_comp104202_c0_seq1	CUST_6955_PI429335447	TGATATACAGCCTGGATAAAATCAAGAAGCTCCGTCTCAACAGAGAGGGCAAACAGAAGG	XP_003442455	ENSDART00000051542	ccdc47	coiled-coil domain-containing protein 47-like	GO:0016021	NA	NA	M_beryllina_05_2013_comp104202_c0_seq1
M_beryllina_05_2013_comp104204_c0_seq1	CUST_33736_PI429335447	AAGGCGATAGAAGATGGACAGAACAACAATGTTGAGCCGGCTGCTTATTTATCAGGGTAG	XP_004561782	ENSDART00000112987	stk32a	serine threonine-protein kinase 32a-like	GO:0006468,GO:0005524,GO:0004674,GO:0009069	NA	NA	M_beryllina_05_2013_comp104204_c0_seq1
M_beryllina_05_2013_comp104206_c0_seq1	CUST_21742_PI429335447	TTTACAGACCTGCTCAACTTTGATGACCCTCTGAATATCGATGCTGCAGAACACCATCTC	XP_004566057	ENSDART00000103701	ube2f	nedd8-conjugating enzyme ube2f-like	GO:0019788,GO:0045116,GO:0005524	NA	NA	M_beryllina_05_2013_comp104206_c0_seq1
M_beryllina_05_2013_comp104207_c0_seq4	CUST_16942_PI429335447	TTACTACAAACTCTTTAAGGAGTATGCCAAACTCCAGGTGACAGAGCCGAAGGTTCGGAA	XP_004566099	ENSDART00000042297	kdelc1	kdel motif-containing protein 1-like	GO:0005788	NA	NA	M_beryllina_05_2013_comp104207_c0_seq4
M_beryllina_05_2013_comp104208_c0_seq8	CUST_38890_PI429335447	AGGTGGCCCAGACACCGAGTTCAGCCAATCACACAGAGACACACACCCAGACACACAAAA	XP_004554401	ENSDART00000128424	TMEM179B (1 of 2)	transmembrane protein 179b	GO:0016021	NA	NA	M_beryllina_05_2013_comp104208_c0_seq8
M_beryllina_05_2013_comp104212_c0_seq1	CUST_5524_PI429335447	GTGGATCAGCAGGGATCTCAGTTCTACAACTCCAAAAGAATAGACTTTGAGCTCTACACA	XP_004071229	ENSDART00000035759	cd2bp2	cd2 antigen cytoplasmic tail-binding protein 2	GO:0008150	NA	NA	M_beryllina_05_2013_comp104212_c0_seq1
M_beryllina_05_2013_comp104213_c0_seq1	CUST_7681_PI429335447	ATGTGTTGAAGAGGCCCCATGTAGATGAATTCCTTCAGAAGATGGGGGAGCTGTTTGAAT	XP_004546802	ENSDART00000089428	ctdspla	ctd small phosphatase-like	GO:0016311,GO:0016791	NA	NA	M_beryllina_05_2013_comp104213_c0_seq1
M_beryllina_05_2013_comp104214_c0_seq2	CUST_36532_PI429335447	AAACGTATATGCAAGAAGAAGACCCACGTGAAGAAGTGCTCTCCCAACCCCGTCTTTAAT	XP_004575595	ENSDART00000045479	syt4	syt11 protein	GO:0016020,GO:0008021,GO:0006810,GO:0005215	NA	NA	M_beryllina_05_2013_comp104214_c0_seq2
M_beryllina_05_2013_comp104215_c0_seq3	CUST_13150_PI429335447	AATGCTTGAGGCTGTCTTCAGCATCAATCTTTGGTTGCCTGTCCTTCATGTCCTTAACAC	XP_004545862	ENSDART00000108987	BX247898.1	gdnf family receptor alpha-4-like	GO:0004872,GO:0048484,GO:0007165	NA	NA	M_beryllina_05_2013_comp104215_c0_seq3
M_beryllina_05_2013_comp104220_c1_seq1	CUST_7708_PI429335447	ACAATGGACGGTTCTGGAACGACGAGGTGTGCTCGGACAAGAACCCCTACATCTGCTCCA	ACO82046	ENSDART00000110749	si:dkeyp-75b4.10	c-type lectin 3	GO:0030246,GO:0005576	NA	NA	M_beryllina_05_2013_comp104220_c1_seq1
M_beryllina_05_2013_comp104220_c1_seq3	CUST_21661_PI429335447	ATCTTCCACCGCGCAGAAAAGTCCTTCCCCGACGCAGAGAACCACTGCCTGTCTCTGGGG	ACO82037	ENSDART00000110749	si:dkeyp-75b4.10	nattectin precursor	GO:0030246,GO:0005576	NA	NA	M_beryllina_05_2013_comp104220_c1_seq3
M_beryllina_05_2013_comp104223_c0_seq2	CUST_23074_PI429335447	AAGATGGAGGAAGAGCAAGAAAAGGTTGGAAAACAGAAAGAGCCTGCTCCTCATTTCCCT	XP_004554388	NA	NA	nucleolar complex protein 2 homolog isoform x1	0	NA	NA	M_beryllina_05_2013_comp104223_c0_seq2
M_beryllina_05_2013_comp104224_c0_seq1	CUST_13159_PI429335447	TTCTGTGGAGAGACTGAGAAAGAATGCGAGCAGCCCACACATTGGAAAATAGTCTACTAA	XP_003445344	ENSDART00000066424	pofut2	gdp-fucose protein o-fucosyltransferase 2	GO:0016757	NA	NA	M_beryllina_05_2013_comp104224_c0_seq1
M_beryllina_05_2013_comp104225_c0_seq2	CUST_17404_PI429335447	TGTTTCGCTGACACACTTGACCTTCGGCAAGGAATTCACAGAAGCCGTTGAAATGAAACA	XP_003442064	ENSDART00000108487	phb	l 37cc	GO:0016020	NA	NA	M_beryllina_05_2013_comp104225_c0_seq2
M_beryllina_05_2013_comp104232_c0_seq1	CUST_13276_PI429335447	ACTTCTGATGAAGAGAGTTGTCTGACGCAGGATGAAATCCAGGCATTCTTAGAAAGGAAC	XP_003456179	ENSDART00000112134	ggnbp2	ggnbp2 protein	GO:0003674,GO:0008150,GO:0005575	NA	NA	M_beryllina_05_2013_comp104232_c0_seq1
M_beryllina_05_2013_comp104240_c0_seq4	CUST_38305_PI429335447	ATGAGCTCCCTGCTGTCCACCCTGGCAGAGGAGAGCAAGTTCCTGGCCATCATGCAGTAG	XP_003439191	ENSDART00000024555	gli2a	transcriptional activator gli3-like	GO:0007411,GO:0021983,GO:0005622,GO:0009790,GO:0050789,GO:0009887,GO:0061061,GO:0048646,GO:0005488	NA	NA	M_beryllina_05_2013_comp104240_c0_seq4
M_beryllina_05_2013_comp104244_c0_seq2	CUST_26797_PI429335447	ATGACTCACTCTGAGTTCAGCTACCAGGCTTTGGATGATGCCCGGTGTTTCTCCGCTGGG	XP_003966675	NA	NA	PREDICTED: uncharacterized protein LOC101075153	0	NA	NA	M_beryllina_05_2013_comp104244_c0_seq2
M_beryllina_05_2013_comp104245_c0_seq2	CUST_16369_PI429335447	CTCCTTCTTTTAGCTCCAGTCAGGTTTGTATTCCAGTCTGGTTAAAAGTCCCTGTCCTCT	ADD14594	ENSDART00000150412	irf7	interferon regulatory factor 7	GO:0003700,GO:0000975,GO:0006355,GO:0005667,GO:0045449	NA	NA	M_beryllina_05_2013_comp104245_c0_seq2
M_beryllina_05_2013_comp104252_c0_seq3	CUST_1414_PI429335447	TACGCCGCCATGGCCAAGCGGGAGATCAACAAGCTGCTCAAGCACAAGGAGAAGAAGAAC	XP_004071164	ENSDART00000058955	arl6ip1	adp-ribosylation factor-like protein 6-interacting protein 1-like	GO:0005783	NA	NA	M_beryllina_05_2013_comp104252_c0_seq3
M_beryllina_05_2013_comp104254_c0_seq2	CUST_11386_PI429335447	TTCGTCACTGAGGAGGACAAGAGGATTCTTCGGGACATCGAGACATTTTACAATACTACC	XP_003437851	ENSDART00000130781	eif4a2	eukaryotic initiation factor 4a-ii-like	GO:0008026,GO:0005524,GO:0003743,GO:0005840,GO:0006446	NA	NA	M_beryllina_05_2013_comp104254_c0_seq2
M_beryllina_05_2013_comp104257_c0_seq2	CUST_32992_PI429335447	AGAGTTTGGAGAAATCAAGAATCTTCATCTGAACCTCGATCGCAGAACGGGCTACCTGAA	XP_004568630	ENSDART00000018253	rbm8a	rna-binding protein 8a	GO:0003723,GO:0006417,GO:0016607,GO:0008380,GO:0000166,GO:0006397,GO:0005737,GO:0000184,GO:0051028	NA	NA	M_beryllina_05_2013_comp104257_c0_seq2
M_beryllina_05_2013_comp104258_c0_seq1	CUST_10147_PI429335447	GACAGAAACGTGTTGCTGAGCTCTCTTTTTCTGCCAGAGAAATTGAAGATACTGTCACTG	XP_004556475	ENSDART00000125251	dnal1	dynein light chain axonemal-like	GO:0008150	NA	NA	M_beryllina_05_2013_comp104258_c0_seq1
M_beryllina_05_2013_comp104263_c0_seq1	CUST_7036_PI429335447	ACCGTCACAGTCGACCTCTCCAAGCCTGTGGGGGACAAGAGAGTCGTGAATGACTGGAAA	XP_004569687	ENSDART00000130826	ccdc9	coiled-coil domain-containing protein 9-like isoform x1	GO:0003674,GO:0008150,GO:0005575	NA	NA	M_beryllina_05_2013_comp104263_c0_seq1
M_beryllina_05_2013_comp104263_c0_seq2	CUST_7039_PI429335447	ACCGTCACAGTCGACCTCTCCAAGCCTGTGGGGGACAAGAGAGTCGTGAATGACTGGAAA	XP_004569688	ENSDART00000130826	ccdc9	coiled-coil domain-containing protein 9-like isoform x2	GO:0003674,GO:0008150,GO:0005575	NA	NA	M_beryllina_05_2013_comp104263_c0_seq2
M_beryllina_05_2013_comp104268_c0_seq4	CUST_33031_PI429335447	TTTGAAGATGAAGGCACCACCGACATGATAGAGAACCACATATCTGACATTGACAACTGA	XP_003448596	ENSDART00000130903	CABZ01071757.1	rna-binding raly-like	GO:0003676,GO:0000166,GO:0005575	NA	NA	M_beryllina_05_2013_comp104268_c0_seq4
M_beryllina_05_2013_comp104270_c0_seq2	CUST_13297_PI429335447	ATGTACAAAGATTCTAACGACAGCACTGTGCCATCTGGATGCGAGGACAACGAAATGATG	XP_004066294	NA	NA	girdin-like isoform x4	0	NA	NA	M_beryllina_05_2013_comp104270_c0_seq2
M_beryllina_05_2013_comp104270_c0_seq3	CUST_13288_PI429335447	AACTCTGTGTTCTCAAACACAATTTTCAGCGATTCAGTTATCGCCACGACAACTAGCCCG	XP_004539001	NA	NA	girdin-like isoform x1	0	NA	NA	M_beryllina_05_2013_comp104270_c0_seq3
M_beryllina_05_2013_comp104274_c0_seq1	CUST_41140_PI429335447	AATGGCATGGTCAACTCGGTTTTTACACTCTATGAGCTGTCCAATGGCGATGACACAGAT	AAH67612	ENSDART00000152433	vps25	vacuolar protein-sorting-associated protein 25-like	GO:0015031,GO:0005737	NA	NA	M_beryllina_05_2013_comp104274_c0_seq1
M_beryllina_05_2013_comp104275_c0_seq2	CUST_34189_PI429335447	AGGAAGTTCGTAGACGTTGACGAGGAGCCCTTCAGCTTCAGAACCTACTGCCAGACGGTG	XP_004574806	ENSDART00000124445	SERTAD4	serta domain-containing protein 4-like	0	NA	NA	M_beryllina_05_2013_comp104275_c0_seq2
M_beryllina_05_2013_comp104276_c0_seq3	CUST_39424_PI429335447	GAAAACTTTCTACAAACAGGAAAATCCAAACGCTCCCAATCCCAAAAAGAGGAAGGACTG	XP_003446695	ENSDART00000152885	adat2	trna-specific adenosine deaminase 2-like	GO:0016787,GO:0008270,GO:0008033	NA	NA	M_beryllina_05_2013_comp104276_c0_seq3
M_beryllina_05_2013_comp104279_c0_seq1	CUST_3076_PI429335447	GAGGCATCAGATGCTAAGTTGAAGCAGGTTGTTCTGAACTTCCTCTCCAGTTTTGAGTAG	XP_004072254	ENSDART00000024199	atp5a1	atp synthase subunit mitochondrial-like isoform 1	GO:0046961,GO:0046933,GO:0015991,GO:0045261,GO:0015986,GO:0005524,GO:0006119	NA	NA	M_beryllina_05_2013_comp104279_c0_seq1
M_beryllina_05_2013_comp104283_c0_seq6	CUST_7849_PI429335447	TCTGGAAAAAGCCATGATAGTAACTTCTACCTTGGGTTACCTTCACAGCAGCCTCAATCC	XP_004078280	ENSDART00000145754	cxcr3.1	c-x-c chemokine receptor type 3-like	GO:0071704,GO:0080090,GO:0042221,GO:0016020,GO:0043549,GO:0040011,GO:0002376,GO:0019956,GO:0004950,GO:0007187	NA	NA	M_beryllina_05_2013_comp104283_c0_seq6
M_beryllina_05_2013_comp104290_c0_seq3	CUST_36589_PI429335447	ATTTAAAATCACCTATCTCAGTAACCATGACTACAAGCCGCTCTACTTTGAGTCCGACGC	XP_003965091	ENSDART00000124022	mapkap1	target of rapamycin complex 2 subunit mapkap1-like	GO:0016301,GO:0016310	NA	NA	M_beryllina_05_2013_comp104290_c0_seq3
M_beryllina_05_2013_comp104293_c0_seq3	CUST_628_PI429335447	GTATAAAAAAGCACACGCTGCCATCAGGGCGAACCCCGTACATGAAAAGAAGCCAAAAAA	XP_004078696	ENSDART00000020299	rpl5b	60s ribosomal protein l5-like	GO:0009790,GO:0005840,GO:0008097,GO:0003735,GO:0006412,GO:0042254	NA	NA	M_beryllina_05_2013_comp104293_c0_seq3
M_beryllina_05_2013_comp104297_c0_seq1	CUST_37423_PI429335447	ATCAGCGTGGTAAAAGACTATACCCTGTACAGAAAGTACAACGTGCAGGAGGTGGTGAAA	XP_003457805	ENSDART00000067096	THUMPD1	thump domain-containing protein 1-like	GO:0003723	NA	NA	M_beryllina_05_2013_comp104297_c0_seq1
M_beryllina_05_2013_comp104298_c0_seq2	CUST_41908_PI429335447	ATAAGAAGTTCGAGTACTTCTCCTCCATCAACTCCATGGCCAAAAAGATCATGCAGGAGC	XP_004550702	ENSDART00000064365	C20H1orf198	wu:fa18f11 protein	0	NA	NA	M_beryllina_05_2013_comp104298_c0_seq2
M_beryllina_05_2013_comp104299_c0_seq1	CUST_5065_PI429335447	TAAAAACAGCTCCAAAACAAAGTCTGAAAGGGAAGCCACACAACAGCAAGAAGAACCTCT	CBN81456	ENSDART00000152996	cpn1	carboxypeptidase n catalytic chain precursor	GO:0005615,GO:0006508,GO:0004181,GO:0008270,GO:0042221	NA	NA	M_beryllina_05_2013_comp104299_c0_seq1
M_beryllina_05_2013_comp104300_c0_seq2	CUST_24919_PI429335447	ATGCAAGTACGACTTCGTGGAAATAGAGGATCCAAATGAAAAGACACTCCTGGGTCGTTG	XP_004553686	ENSDART00000074710	PDGFC	platelet-derived growth factor c-like	GO:0016020,GO:0008083,GO:0051781,GO:0007165,GO:0008283,GO:0040007	NA	NA	M_beryllina_05_2013_comp104300_c0_seq2
M_beryllina_05_2013_comp104303_c0_seq1	CUST_42430_PI429335447	TGAATATAAGTGCCCTAAATGCAAGAGAAAGTGGATGAGTGGGAACTCCTGGGCCAACAT	XP_004561319	ENSDART00000109307	zcchc24	zinc finger cchc domain-containing protein 24-like	GO:0008270,GO:0003676	NA	NA	M_beryllina_05_2013_comp104303_c0_seq1
M_beryllina_05_2013_comp104304_c0_seq2	CUST_5698_PI429335447	TTGACTCCTTTCAAATTGGAATGGACTCAGACATAACCTTCTGCCTGAAGGAGTTGAGGG	XP_004567382	ENSDART00000133519	rad9b	cell cycle checkpoint control protein rad9b-like	GO:0000075,GO:0006974	NA	NA	M_beryllina_05_2013_comp104304_c0_seq2
M_beryllina_05_2013_comp104305_c0_seq4	CUST_36019_PI429335447	TGAACCCAGGAAAAGCAATCGCTGAGATCAAGAAGATGATGGCCACATACAAGGAGAAGA	XP_003441476	ENSDART00000062264	sdhb	succinate dehydrogenase iron-sulfur mitochondrial precursor	GO:0016491,GO:0006099,GO:0009055,GO:0051537,GO:0006118	NA	NA	M_beryllina_05_2013_comp104305_c0_seq4
M_beryllina_05_2013_comp104307_c0_seq1	CUST_5878_PI429335447	AAATTGGGGGAAATTCTGCAGAATCCAGAAAGCACCCAGGATGACCAGTTACTGCTTGTA	XP_004543590	ENSDART00000088071	CENPQ	centromere protein q-like	0	NA	NA	M_beryllina_05_2013_comp104307_c0_seq1
M_beryllina_05_2013_comp104311_c0_seq2	CUST_6796_PI429335447	TGAAGAAGGAGTGTGATGGTCATGCCCACTTAAGAAAAGACATACAGATCCAGTCTAGGC	XP_003446663	NA	NA	coiled-coil domain-containing protein 122-like	0	NA	NA	M_beryllina_05_2013_comp104311_c0_seq2
M_beryllina_05_2013_comp104313_c1_seq1	CUST_39829_PI429335447	AAAGATCCCGAGGTCAGGACCAGAAAGATTGTTAAAGTCGTCACTCAGACCGTGATCAAT	XP_004566812	ENSDART00000139066	krt1-c5	type i cytoskeletal 18-like	GO:0005882,GO:0005198	NA	NA	M_beryllina_05_2013_comp104313_c1_seq1
M_beryllina_05_2013_comp104314_c0_seq1	CUST_19636_PI429335447	AAAGATGGTGTTCAATGTGCATTTGAGGAACTAGTCGAAAAGATCATCCAGACTCCCGGC	XP_003450287	ENSDART00000042737	rab18b	member ras oncogene family	GO:0009790,GO:0005525,GO:0007420,GO:0001654,GO:0007264,GO:0015031	NA	NA	M_beryllina_05_2013_comp104314_c0_seq1
M_beryllina_05_2013_comp104315_c0_seq1	CUST_12760_PI429335447	AAACCATTATCCCAAAAAGTGAAAACGACTACATAATGGTGGTACTGGGGGAGCACAGGG	XP_004546431	ENSDART00000047912	gpkow	g patch domain and kow motifs-containing	GO:0005634,GO:0003676	NA	NA	M_beryllina_05_2013_comp104315_c0_seq1
M_beryllina_05_2013_comp104320_c0_seq1	CUST_42754_PI429335447	AGTAAAACCACAATACTCATACAGGGTTCCTTCAAATGTGTGCTTTGGTCACAGCTCAGT	XP_004555955	ENSDART00000000831	znf511	zinc finger protein 511	GO:0046872,GO:0003676	NA	NA	M_beryllina_05_2013_comp104320_c0_seq1
M_beryllina_05_2013_comp104324_c0_seq6	CUST_33298_PI429335447	TCTGAATGAGGAGCTTGTACAGTTGCTGCTGATTCGTGATGAACTACACATGGAGCAAGA	XP_004543626	ENSDART00000050956	schip1	schwannomin-interacting protein 1-like	GO:0003674,GO:0008150,GO:0005575	NA	NA	M_beryllina_05_2013_comp104324_c0_seq6
M_beryllina_05_2013_comp104325_c0_seq1	CUST_29302_PI429335447	TTCTTCTGCTACATCATGTACAAAAGTCAACAAGAAGCAGCCGCAAAGAAGTTCTTTTGA	XP_004549717	ENSDART00000102304	lman1	protein ergic-53-like	GO:0016020,GO:0042221	NA	NA	M_beryllina_05_2013_comp104325_c0_seq1
M_beryllina_05_2013_comp104327_c0_seq2	CUST_6622_PI429335447	GGTCAGTAATGTTTCCTTCTTGTCTTCTGTTCCTCTTTTGATGTGCTGTAACCAATACAT	XP_003449060	ENSDART00000111623	cluap1	clusterin-associated protein 1 homolog	GO:0042384,GO:0001822,GO:0005634	NA	NA	M_beryllina_05_2013_comp104327_c0_seq2
M_beryllina_05_2013_comp104328_c0_seq1	CUST_4351_PI429335447	AATTACAACAAAGAATGGTACCGGCGTAACTTCACCATCACCTTACTCATGGCCCGAGTA	XP_003447839	ENSDART00000146234	apopt1	c14orf153 precursor	0	NA	NA	M_beryllina_05_2013_comp104328_c0_seq1
M_beryllina_05_2013_comp104337_c0_seq1	CUST_19153_PI429335447	GCCCAGGCCAAGGAGGACCAGGACCAGGACCAGGTCCTGTTTGTTGAAGCGGCTCCTTAA	XP_004571196	ENSDART00000122293	CABZ01118266.1	major facilitator superfamily domain-containing protein 7-like	GO:0055085,GO:0016021	NA	NA	M_beryllina_05_2013_comp104337_c0_seq1
M_beryllina_05_2013_comp104342_c0_seq5	CUST_22894_PI429335447	TTCTTACAGGATTACTGTGCCAGAGGGACCTTCTCTGATCTGGATCTGATTGACAACTTG	XP_004071533	ENSDART00000067720	nup85	nuclear pore complex protein nup85-like	GO:0031080,GO:0031965,GO:0051028,GO:0015031	NA	NA	M_beryllina_05_2013_comp104342_c0_seq5
M_beryllina_05_2013_comp104345_c1_seq1	CUST_26911_PI429335447	TATTACATGTGTGTCTGGAGAGGAGGCAGGATTCACTATCAGCCTCAGAAGACTTATACT	XP_004074811	NA	NA	PREDICTED: uncharacterized protein LOC101161254	0	NA	NA	M_beryllina_05_2013_comp104345_c1_seq1
M_beryllina_05_2013_comp104351_c0_seq1	CUST_38812_PI429335447	CAAAAGCTCAAAGAAAACAACTCAGAAAAACCGGTTGGACATTCAGACAAGAGGGAGTGA	XP_004551231	ENSDART00000129519	TMEM136 (3 of 3)	transmembrane protein 136-like	GO:0016021	NA	NA	M_beryllina_05_2013_comp104351_c0_seq1
M_beryllina_05_2013_comp104352_c0_seq4	CUST_20764_PI429335447	TATAAAACAAGGTCAAAGTTCAATACATTTTGTGGGAAGCGATCTCAGGGATTGGATTAA	XP_004067986	ENSDART00000009081	mob3a	mps one binder kinase activator-like 2a	GO:0016301,GO:0016310	NA	NA	M_beryllina_05_2013_comp104352_c0_seq4
M_beryllina_05_2013_comp104354_c0_seq2	CUST_27856_PI429335447	GACCTAGATCAACTAATGAAGAACAAGATGAAGGTGAAATTATCTACGCGGATGTTAGAG	XP_004561793	NA	NA	PREDICTED: uncharacterized protein LOC101487966	0	NA	NA	M_beryllina_05_2013_comp104354_c0_seq2
M_beryllina_05_2013_comp104355_c0_seq12	CUST_41722_PI429335447	TCTGCTGTCAACGATTTCCTCTCCTGTATCCTTTCCTTGTTAAAGTCTCTGCTGCAGAGA	XP_004556066	ENSDART00000075414	wdr27	wd repeat-containing protein 27-like	GO:0003674,GO:0008150,GO:0005575	NA	NA	M_beryllina_05_2013_comp104355_c0_seq12
M_beryllina_05_2013_comp104359_c0_seq1	CUST_33022_PI429335447	ATATGCAACTTAATTTTAGGAAGTCCACCTTCAAAGGTCTACGGCAACATCAGAGTGGTG	XP_003963910	ENSDART00000010261	pno1	rna-binding protein pno1	GO:0005730,GO:0003723	NA	NA	M_beryllina_05_2013_comp104359_c0_seq1
M_beryllina_05_2013_comp104365_c0_seq1	CUST_26878_PI429335447	ACATTTGGAGGAAACAGTGGAGGAATGTTCCAGAGTCATAAAGGATCTCAGGCTGACCAA	XP_004073217	NA	NA	PREDICTED: uncharacterized protein LOC101159755 isoform 2	0	NA	NA	M_beryllina_05_2013_comp104365_c0_seq1
M_beryllina_05_2013_comp104365_c0_seq4	CUST_26875_PI429335447	AAGCTCAGGGATGAACTTCGAAGCCTTGAGAATGAAATGGAGGATGTTAATTTAATGCTG	XP_004073216	NA	NA	PREDICTED: uncharacterized protein LOC101159755 isoform 1	0	NA	NA	M_beryllina_05_2013_comp104365_c0_seq4
M_beryllina_05_2013_comp104368_c0_seq2	CUST_42478_PI429335447	TAAATTGGCCATTGAGTTGTGGAGCGAGCACGGTAGAAGAGAAATTGTGAGGAGCAGTAT	XP_003438485	ENSDART00000050585	znhit2	zinc finger hit domain-containing protein 2-like	GO:0003674,GO:0008150,GO:0005575	NA	NA	M_beryllina_05_2013_comp104368_c0_seq2
M_beryllina_05_2013_comp104370_c0_seq1	CUST_41641_PI429335447	ATAAGACCAAGACGAACCCCGGCAGTACATCCGGAAACGTCGGTGCCTCTCAAAGCTCGT	XP_004547922	ENSDART00000052649	WIPF3	was wasl-interacting protein family member 3-like isoform x3	0	NA	NA	M_beryllina_05_2013_comp104370_c0_seq1
M_beryllina_05_2013_comp104371_c0_seq9	CUST_5530_PI429335447	GCTGGAATGATGAAATGTGCTCCATGAATCACTACTGGATTTGTGAAAAATTACTTGTCA	XP_003459864	ENSDART00000037303	si:ch211-214k5.3	cd209 antigen-like	GO:0030246	NA	NA	M_beryllina_05_2013_comp104371_c0_seq9
M_beryllina_05_2013_comp104373_c0_seq5	CUST_14722_PI429335447	GGAGATCGTGTCAACAGTCTGTACCAGTTCCCAGAGGAAAGCGTGCTTACTTTTAAGTAT	XP_004541593	NA	NA	hemicentin-2-like isoform x2	0	NA	NA	M_beryllina_05_2013_comp104373_c0_seq5
M_beryllina_05_2013_comp104374_c0_seq5	CUST_24481_PI429335447	CGTCATAGTGATAACATCATGGTTCGCAGCACTGGACAGCTTTTTCACATAGATTTCGGT	XP_003459564	ENSDART00000114560	pik3cb	phosphatidylinositol- -bisphosphate 3-kinase catalytic subunit alpha isoform-like	GO:0016773,GO:0048015,GO:0005524,GO:0035004,GO:0046854,GO:0044464	NA	NA	M_beryllina_05_2013_comp104374_c0_seq5
M_beryllina_05_2013_comp104380_c0_seq1	CUST_12211_PI429335447	TCATCAGTCTTGCTGTGGGTCTGGTCAGCATCAGAGGGGTGGACAGTGGCCTTTACCTTG	XP_003450002	ENSDART00000013024	fgf20a	fibroblast growth factor 20a	GO:0031101,GO:0060249,GO:0008083,GO:0048703,GO:0007165,GO:0008283	NA	NA	M_beryllina_05_2013_comp104380_c0_seq1
M_beryllina_05_2013_comp104383_c0_seq2	CUST_23620_PI429335447	TCAATGAAAATGGAGAATAAAGAGAGTCTCTACAGTGGACATTTAACTTTCGAAGGTTAG	XP_004081607	ENSDART00000077937	p2ry8	p2y purinoceptor 8-like	GO:0045028,GO:0016021,GO:0035589,GO:0007187	NA	NA	M_beryllina_05_2013_comp104383_c0_seq2
M_beryllina_05_2013_comp104386_c0_seq3	CUST_21424_PI429335447	ATAGTTATGGATTACGGAGCCAACGCTCAAGTCTTCTATCAACACACCTTCAGCAGTAGC	XP_004079747	ENSDART00000082934	NAGK	n-acetyl-d-glucosamine kinase	GO:0016301,GO:0016310	NA	NA	M_beryllina_05_2013_comp104386_c0_seq3
M_beryllina_05_2013_comp104386_c0_seq4	CUST_21421_PI429335447	CACAAAATTCCAGAAGTCTCACTTTGCGGGTTTCTGCAAAAAACTGTCTGAAGGTGCAGA	XP_004079747	ENSDART00000082934	NAGK	n-acetyl-d-glucosamine kinase	GO:0016301,GO:0016310	NA	NA	M_beryllina_05_2013_comp104386_c0_seq4
M_beryllina_05_2013_comp104390_c0_seq1	CUST_18928_PI429335447	AGAATTGCTTTGGCAGAGCTGCTTTTTGAAAAGGGGATTATCCACACTGCAGAACTCTTG	XP_004550525	ENSDART00000097729	zgc:162967	lysine-specific demethylase no66-like	GO:0055114,GO:0051864,GO:0034720,GO:0032453,GO:0005730,GO:0045668,GO:0016702,GO:0070544,GO:0005654,GO:0045892,GO:0005506	NA	NA	M_beryllina_05_2013_comp104390_c0_seq1
M_beryllina_05_2013_comp104391_c0_seq1	CUST_10981_PI429335447	TCTTCCAGAACATGCTGAACTTCTACAACTTCTCAGCTCGGGTGATGGCCGACCAGCTGA	XP_004086656	ENSDART00000125867	ECE2	endothelin-converting enzyme 2-like	GO:0004222,GO:0006508	NA	NA	M_beryllina_05_2013_comp104391_c0_seq1
M_beryllina_05_2013_comp104393_c0_seq2	CUST_32713_PI429335447	AGAGGTAGTGGAACAATGAGGCCTATTTGGTTTAAGAAAAGTTTCATCCATGGCAAATAA	XP_003445620	ENSDART00000108518	rnf10	ring finger protein 10	GO:0008270	NA	NA	M_beryllina_05_2013_comp104393_c0_seq2
M_beryllina_05_2013_comp104394_c0_seq1	CUST_4330_PI429335447	AAGTGGTACGAGAACTTCCAGAGGAGGATGACGCAGAACCCGAACTTTTGGAAAAACTGA	XP_004554703	ENSDART00000059341	C1H11orf73	c11orf73 homolog	GO:0006606,GO:0034605,GO:0008565,GO:0030544,GO:0005634,GO:0005829	NA	NA	M_beryllina_05_2013_comp104394_c0_seq1
M_beryllina_05_2013_comp104395_c0_seq1	CUST_6973_PI429335447	GATGGATGATGAAAGGTACTTCAATGAGATGTCTGCACAAGGTTTGCGTGCCAGAACAGT	XP_004077115	ENSDART00000063613	ccdc6a	coiled-coil domain-containing protein 6	GO:0003674,GO:0008150,GO:0005575	NA	NA	M_beryllina_05_2013_comp104395_c0_seq1
M_beryllina_05_2013_comp104396_c0_seq4	CUST_30679_PI429335447	CTATCAGTTATTATCTCTACATAACCTTCTTAGGATACAACGCTCTGCCCTTCCTGACAA	XP_003455933	ENSDART00000059212	unc50	protein unc-50 homolog	GO:0000139,GO:0003723,GO:0016021,GO:0005637,GO:0015031	NA	NA	M_beryllina_05_2013_comp104396_c0_seq4
M_beryllina_05_2013_comp104399_c0_seq1	CUST_5041_PI429335447	TGGTAACATCAAGGCGTTTATTTCCATCCACGCATACTCTCAGATGCTCCTGTACCCTTT	BAC53788	ENSDART00000034377	cpa5	carboxypeptidase a1 precursor	GO:0006508,GO:0004181,GO:0008270	NA	NA	M_beryllina_05_2013_comp104399_c0_seq1
M_beryllina_05_2013_comp104400_c1_seq1	CUST_41248_PI429335447	TATCATCTACGTCTTCATGAACAAACAGTTCAGGAAGTGTCTGATCCAGCACTTCACCGG	BAG68691	ENSDART00000076334	valopb	vertebrate ancient long opsin	GO:0004930,GO:0007602,GO:0018298,GO:0007186,GO:0009881,GO:0007601,GO:0016021	NA	NA	M_beryllina_05_2013_comp104400_c1_seq1
M_beryllina_05_2013_comp104401_c3_seq7	CUST_17314_PI429335447	AGAAGATTTATGAGAGAGACAAGTCTGACATTAGCCTGGATGTGTACTACCGTGGTGTGA	XP_003452510	ENSDART00000131072	rpz2	krev interaction trapped protein 1-like	GO:0033333	NA	NA	M_beryllina_05_2013_comp104401_c3_seq7
M_beryllina_05_2013_comp104405_c0_seq1	CUST_24142_PI429335447	AAACACAGAGATCGAAACAGAGGGGTACTTGTTGGAGAAAGGGGTGAAAGAAACCATCAT	XP_004557355	ENSDART00000011295	rom1a	peripherin-2-like	GO:0007601,GO:0016021	NA	NA	M_beryllina_05_2013_comp104405_c0_seq1
M_beryllina_05_2013_comp104407_c0_seq1	CUST_15982_PI429335447	ACAATGGTATGATAAACAAACTGTCACTGGACAGAAAAGGGGACGACATGAGGTTCGTCA	XP_003450317	ENSDART00000124232	mcl1b	induced myeloid leukemia cell differentiation protein mcl-1 homolog	GO:0043009,GO:0043154,GO:0001894,GO:0043066	NA	NA	M_beryllina_05_2013_comp104407_c0_seq1
M_beryllina_05_2013_comp104408_c0_seq4	CUST_24298_PI429335447	GTTACCACAACCAAGAAGAAAGGAGGGGTCAAAACGCCTAAGAAGTCCAAGTCAAAGTGA	XP_004539535	ENSDART00000102563	phf10	---NA---	0	NA	NA	M_beryllina_05_2013_comp104408_c0_seq4
M_beryllina_05_2013_comp104408_c0_seq5	CUST_24295_PI429335447	ATGAAAAGAAAACAAGAACTCATCTGACAGTTCATCAGGCAACACATCAGACGTGGAGAG	XP_004539534	ENSDART00000121598	phf10	phd finger protein 10	GO:0008270,GO:0006355,GO:0007399,GO:0005634	NA	NA	M_beryllina_05_2013_comp104408_c0_seq5
M_beryllina_05_2013_comp104409_c0_seq4	CUST_31078_PI429335447	TTCTCTGAGTGGGATTGACATTTTGGAAAACAAAACCAAGTTCCTGCTCTACACGTGCCC	XP_003449148	ENSDART00000129162	CABZ01074081.2	ptb domain-containing engulfment adapter protein 1-like	GO:0006915,GO:0005737,GO:0006909,GO:0006810	NA	NA	M_beryllina_05_2013_comp104409_c0_seq4
M_beryllina_05_2013_comp104411_c0_seq1	CUST_33607_PI429335447	ATAATGTGAGGAGCATGAGGAAATTGTTCCGAAGCAGTCATACCACTGGTGAGGTGAAAC	XP_004067290	NA	NA	serglycin precursor	0	NA	NA	M_beryllina_05_2013_comp104411_c0_seq1
M_beryllina_05_2013_comp104413_c0_seq9	CUST_29494_PI429335447	TCAAAAGACCATCAGTCCATGGAAGGTCAAGTCCCAGCAAAGCTTCATTTCACAGATGGA	XP_003455525	NA	NA	protein fam194a-like isoform x2	0	NA	NA	M_beryllina_05_2013_comp104413_c0_seq9
M_beryllina_05_2013_comp104415_c1_seq1	CUST_15070_PI429335447	GAGAAGAGTTATCAGGTTGTTGTGGAAGACTACAGGAAAATCATTGAGCGGCTAGCGACA	XP_003447363	ENSDART00000044128	hat1	histone acetyltransferase type b catalytic subunit-like	GO:0006348,GO:0016573,GO:0004402,GO:0000123,GO:0042967	NA	NA	M_beryllina_05_2013_comp104415_c1_seq1
M_beryllina_05_2013_comp104417_c0_seq1	CUST_42886_PI429335447	AAAGTTTATCAGTGCCAGTATTGTGAGTACAACAGTACGGACGCTTCTGGCTTCAAACGC	XP_004541038	ENSDART00000106654	znf711	zinc finger protein 711-like	GO:0008270,GO:0043565,GO:0045893,GO:0005737,GO:0060388,GO:0005634	NA	NA	M_beryllina_05_2013_comp104417_c0_seq1
M_beryllina_05_2013_comp104419_c0_seq2	CUST_27352_PI429335447	AAATACATTTTGAGAAAGTCTCAGAAAGGTGTGAGGAAGAAGCCGGACGATTCGGCCAAG	XP_004546420	NA	NA	PREDICTED: uncharacterized protein LOC101469161	0	NA	NA	M_beryllina_05_2013_comp104419_c0_seq2
M_beryllina_05_2013_comp104420_c2_seq3	CUST_20074_PI429335447	ATAAAGACGTCCACCTACGACAGAAGTTTCACTTGCTTTTGTTCTCCGCCGTGGTTTCAT	ABD48779	ENSDART00000056457	mitfa	micropthalmia-related transcription factor mitfa	GO:0046983,GO:0006355	NA	NA	M_beryllina_05_2013_comp104420_c2_seq3
M_beryllina_05_2013_comp104420_c2_seq6	CUST_20221_PI429335447	TGAAGTTCGGGCCCTCGCTAAAGAAAGACAGAAGAAAGACAACCACAACTTAATCGAACG	BAD69634	ENSDART00000056457	mitfa	mitf-a	GO:0046983,GO:0006355	NA	NA	M_beryllina_05_2013_comp104420_c2_seq6
M_beryllina_05_2013_comp104425_c0_seq2	CUST_34915_PI429335447	TCCGAAACTTAGCGCAGAGGAGGAGGAAGAATTAAAAAAGCAGCTCACAGATACCACAGA	XP_004074867	ENSDART00000080449	slc5a1	sodium glucose cotransporter 1-like	GO:0055085,GO:0016021,GO:0005215	NA	NA	M_beryllina_05_2013_comp104425_c0_seq2
M_beryllina_05_2013_comp104429_c0_seq18	CUST_6946_PI429335447	GAGCTTGAGAAAAAACAACAACAGGTAGTATATTTCCTGCTCCTGTTTACTTCACTTTAC	XP_004540658	ENSDART00000051530	ccdc42b	coiled-coil domain-containing protein 42 homolog	0	NA	NA	M_beryllina_05_2013_comp104429_c0_seq18
M_beryllina_05_2013_comp104432_c2_seq4	CUST_10330_PI429335447	AACTATTCTCAACCATCACTGTGGCTACACTATTTTGCACATCCTGAGTCAGCTAAGACC	XP_003441538	ENSDART00000078240	41707	e3 ubiquitin-protein ligase march9-like	GO:0005794,GO:0008270	NA	NA	M_beryllina_05_2013_comp104432_c2_seq4
M_beryllina_05_2013_comp104435_c0_seq14	CUST_2101_PI429335447	TTGGCTAAAATGAAGATTTCCTCTTACTGGAAAACTCTCTCCTTCAGAGGAGTTCAAATA	CBN81145	ENSDART00000084380	aggf1	rna-binding protein 5	GO:0051897,GO:0001525,GO:0001570,GO:0003676,GO:0060841	NA	NA	M_beryllina_05_2013_comp104435_c0_seq14
M_beryllina_05_2013_comp104441_c0_seq1	CUST_12118_PI429335447	TCTGAGTCAGCAGGAGGTCCGGAAAGTCCACCGGAACATCGAACGCAGCGCCGAGGAACT	XP_003452421	ENSDART00000066855	fars2	ferredoxin-fold anticodon-binding domain-containing protein 1-like	GO:0006432,GO:0008033,GO:0005524,GO:0004826,GO:0000287,GO:0000049,GO:0000162,GO:0006571,GO:0009094,GO:0009328	NA	NA	M_beryllina_05_2013_comp104441_c0_seq1
M_beryllina_05_2013_comp104443_c0_seq12	CUST_41164_PI429335447	TTTCACGGTCTACAGCTATGCCTCTTCTGTTTTCTCATGCGCTGGGCTTTCACAAGTTTT	XP_004571814	ENSDART00000129538	BPHL	valacyclovir hydrolase-like	0	NA	NA	M_beryllina_05_2013_comp104443_c0_seq12
M_beryllina_05_2013_comp104445_c2_seq2	CUST_25471_PI429335447	TACTTGTTTTATTTCCTTTCAGCAAGAACCCAGGCTTCCCTCAATTGTGGAGACCAAGGG	CBN81475	ENSDART00000089042	kcnh4	potassium voltage-gated channel subfamily h member 4-like	0	NA	NA	M_beryllina_05_2013_comp104445_c2_seq2
M_beryllina_05_2013_comp104446_c0_seq3	CUST_9715_PI429335447	TCCCAAGAAAAGGGAAATTTATGATCAGTATGGAGAGGAAGGTCTCAAAGGGGGAAATGG	XP_003448498	ENSDART00000056896	dnajb4	dnaj homolog subfamily b member 4-like	GO:0006457,GO:0051082	NA	NA	M_beryllina_05_2013_comp104446_c0_seq3
M_beryllina_05_2013_comp104449_c0_seq4	CUST_10303_PI429335447	AGATCCTTTGGTTCTGGCAGGTTTGCCCTTTTTTATGTTTCTTCCTCCCAATAGTTGTCT	CBN80791	ENSDART00000111497	ITCH (1 of 2)	e3 ubiquitin-protein ligase itchy-like	GO:0004842,GO:0005622,GO:0016567	NA	NA	M_beryllina_05_2013_comp104449_c0_seq4
M_beryllina_05_2013_comp104452_c0_seq5	CUST_3568_PI429335447	CCTTACCAAGATGTGGGCAACATGATGGAAGAAAAGGAAGAAATCCAGCTGGAGAAACCA	XP_004078286	ENSDART00000054550	cd79a	b-cell antigen receptor complex-associated protein alpha chain-like	0	NA	NA	M_beryllina_05_2013_comp104452_c0_seq5
M_beryllina_05_2013_comp104456_c0_seq2	CUST_42544_PI429335447	TCACAGACACTCTGGAGTACATGAAGGCGGACCACCACGTGGACCTGCAGTGCTACTACA	XP_004556557	ENSDART00000082133	si:dkeyp-113d7.1	zinc finger protein 112-like	GO:0005488	NA	NA	M_beryllina_05_2013_comp104456_c0_seq2
M_beryllina_05_2013_comp104459_c0_seq4	CUST_6274_PI429335447	TACAGACCACAACCTGGTCAGTCTCTGTCCCAGTCGAGTCTGCTAGAGTCCCAGTCCCAA	XP_004568215	NA	NA	chromatin modification-related protein eaf-1-like isoform x2	GO:0005634,GO:0003677	NA	NA	M_beryllina_05_2013_comp104459_c0_seq4
M_beryllina_05_2013_comp104461_c0_seq8	CUST_19768_PI429335447	ATTCAAATTCTAATGGCAAGTCTGTGTCATGGTCTGAATCAGGTCCAAGACACCCTCCGA	XP_004083645	ENSDART00000048546	GRM1 (2 of 2)	metabotropic glutamate receptor 1-like	GO:0016020,GO:0004871,GO:0007165	NA	NA	M_beryllina_05_2013_comp104461_c0_seq8
M_beryllina_05_2013_comp104462_c2_seq2	CUST_34648_PI429335447	ATGATTCCATACGCAAACATGATAAGAAAAGAAAAGATCACTTCCCATCTCGGCAAATAG	XP_004075056	ENSDART00000124640	SKOR2	ski family transcriptional corepressor 1 homolog-b-like	GO:0050794,GO:0006351	NA	NA	M_beryllina_05_2013_comp104462_c2_seq2
M_beryllina_05_2013_comp104464_c0_seq1	CUST_16318_PI429335447	CTGACGGCGGCCTCTCGTAACTGCTTACACTTCAGGAAGATCTACTTCCATGGATGTTAA	XP_004065588	NA	NA	integumentary mucin -like	0	NA	NA	M_beryllina_05_2013_comp104464_c0_seq1
M_beryllina_05_2013_comp104465_c0_seq1	CUST_26137_PI429335447	ATTTCTCGGAGCATCCGTCCTGCTCGCCCTCATCGTCATCACACTCAGGAAGTTCATGGC	XP_003438183	ENSDART00000139944	si:dkeyp-12a9.5	PREDICTED: hypothetical protein LOC100705379	0	NA	NA	M_beryllina_05_2013_comp104465_c0_seq1
M_beryllina_05_2013_comp104469_c0_seq3	CUST_17440_PI429335447	AGCAAGTACTTTGTGCCTTTGGAGATGTACCAGTGGTACGCCTACCCGGACTACACGGCC	XP_004570549	ENSDART00000024948	b3gnt5a	lactosylceramide -n-acetyl-beta-d-glucosaminyltransferase a-like	GO:0005794,GO:0008375,GO:0016020	NA	NA	M_beryllina_05_2013_comp104469_c0_seq3
M_beryllina_05_2013_comp104471_c0_seq1	CUST_20164_PI429335447	ATCAACAAACTGACGGAGAAAAACGTGAAGCTGGATGAGAGCCTTAAAAAGGTCCAGCAG	XP_003455862	ENSDART00000122727	mtus1a	microtubule-associated tumor suppressor 1 homolog a-like	GO:0007049,GO:0005794,GO:0005739,GO:0005634,GO:0005886	NA	NA	M_beryllina_05_2013_comp104471_c0_seq1
M_beryllina_05_2013_comp104477_c0_seq1	CUST_31681_PI429335447	TTCCTGGAGGTCCACTCCACCTTCTTCAGCAACTGCTCCCGGGGAGAGGAGGACCCGTTT	XP_003961117	ENSDART00000125267	NA	receptor activity-modifying protein 3-like	GO:0008277,GO:0016021,GO:0006886,GO:0008565	NA	NA	M_beryllina_05_2013_comp104477_c0_seq1
M_beryllina_05_2013_comp104478_c0_seq1	CUST_26461_PI429335447	TTCCTCCTACTGTTTCTGCGCAGACAGCCGAGGACGAGAGCTGCAGGGCACAGGTGTGGA	XP_003965808	ENSDART00000016386	tg	PREDICTED: thyroglobulin-like	0	NA	NA	M_beryllina_05_2013_comp104478_c0_seq1
M_beryllina_05_2013_comp104479_c0_seq1	CUST_23341_PI429335447	ATTGCTTTCAGAAAATGAGCTTCAGTCGATCCGCCTAAAGATCAACAGCCGCGAGAGAAA	XP_003454955	ENSDART00000060006	olig2	oligodendrocyte transcription factor 3-like	GO:0001764,GO:0007403,GO:0021742,GO:0050769,GO:0046983,GO:0007400,GO:0021754,GO:0071542,GO:0021520,GO:0014003,GO:0021514	NA	NA	M_beryllina_05_2013_comp104479_c0_seq1
M_beryllina_05_2013_comp104483_c1_seq1	CUST_39118_PI429335447	CAAAGGGAAGGTGCAGAAAGACCAAAGCTCCTCTTCATCTTCATCCTCGTCCTCCTCTGA	XP_004569551	NA	NA	transmembrane protein 71-like	0	NA	NA	M_beryllina_05_2013_comp104483_c1_seq1
M_beryllina_05_2013_comp104485_c0_seq12	CUST_29497_PI429335447	CAGACAAAAGCCCTGCTACATCACACAGGTGAGAGTAGTGACACAGATGATTTACTTTCC	XP_004077386	ENSDART00000114207	FAM196A (1 of 3)	protein fam196a-like	0	NA	NA	M_beryllina_05_2013_comp104485_c0_seq12
M_beryllina_05_2013_comp104485_c0_seq7	CUST_4357_PI429335447	GGACTCCATTCAGCAAAATACCAGTATGCTATAGATCAGTATAATCGTGAACACAAAGTA	XP_003440764	NA	NA	c14orf24 homolog	GO:0003674,GO:0008150,GO:0005575	NA	NA	M_beryllina_05_2013_comp104485_c0_seq7
M_beryllina_05_2013_comp104491_c0_seq2	CUST_22549_PI429335447	AGACAATGACTCTGAAGAAGAACCGGTGAAAACCAAGGCTAAACCTGCAGCTGTTAAAGC	XP_003964263	ENSDART00000102651	nolc1	nolc1l protein	GO:0048701	NA	NA	M_beryllina_05_2013_comp104491_c0_seq2
M_beryllina_05_2013_comp104492_c0_seq1	CUST_41611_PI429335447	ACCTTCAAGAGCTTCCTGGCGCGCAGCGACATCGGCATCATCCTGATCAACCAGTTCATC	XP_003978974	ENSDART00000066963	atp6v1f	v-type proton atpase subunit f-like	GO:0015991,GO:0046961,GO:0033180,GO:0060041,GO:0006119	NA	NA	M_beryllina_05_2013_comp104492_c0_seq1
M_beryllina_05_2013_comp104494_c0_seq2	CUST_20332_PI429335447	ATTCTGCTGACCAGATACACAGCACAGCAGTTTCAGAATCCTATTCCTTTTGCAGACGAC	XP_003438977	ENSDART00000084417	timm17b	mitochondrial import inner membrane translocase subunit tim17-a	GO:0015450,GO:0005744,GO:0006886,GO:0016021,GO:0009941	NA	NA	M_beryllina_05_2013_comp104494_c0_seq2
M_beryllina_05_2013_comp104494_c1_seq1	CUST_25267_PI429335447	AGAAACGAGGCAGAAAAGATGAAGAAATGGACCCCATGGATCCAAGTGCCTATTCTGATG	ACM08546	ENSDART00000075783	pqbp1	polyglutamine-binding protein 1	0	NA	NA	M_beryllina_05_2013_comp104494_c1_seq1
M_beryllina_05_2013_comp104497_c0_seq1	CUST_14089_PI429335447	ACAACAAAATCAATCGAATGTCCGACGTCCTGATGTCCGTGAATGTGACCGTAATCGACA	BAD91570	ENSDART00000058489	gzma	granzyme a-like	GO:0008236	NA	NA	M_beryllina_05_2013_comp104497_c0_seq1
M_beryllina_05_2013_comp104498_c0_seq1	CUST_15682_PI429335447	AGTATTTCCAGTACAAGCAGCTTTGGGACATGTTCAAACTTCCAGGAGAAGCAGACAGGA	XP_003454141	NA	NA	hydrolethalus syndrome protein 1 homolog	0	NA	NA	M_beryllina_05_2013_comp104498_c0_seq1
M_beryllina_05_2013_comp104499_c0_seq4	CUST_4108_PI429335447	TATCCACTCTGGAGGAGCCTTTTCAGACTCTGTGTCAGGACAGGTCCATCCACTGGACCC	XP_003438604	ENSDART00000012743	mlst8	target of rapamycin complex subunit lst8-like	GO:0005737	NA	NA	M_beryllina_05_2013_comp104499_c0_seq4
M_beryllina_05_2013_comp104499_c0_seq7	CUST_36592_PI429335447	AACTGACCACAATGAGCAGCTCATTCCGGAATTAGAGGTCTCTGTCAACTCTGTTCACAT	XP_004080193	ENSDART00000012743	mlst8	target of rapamycin complex subunit lst8-like	GO:0005737	NA	NA	M_beryllina_05_2013_comp104499_c0_seq7
M_beryllina_05_2013_comp104501_c0_seq1	CUST_1108_PI429335447	GATGCAATGTCAACATACGTCAAGCATGCTAAGGAAATGATTGGCAAATATGGGATGTAG	XP_004077928	ENSDART00000046209	acbd7	acyl- -binding protein homolog	GO:0000062	NA	NA	M_beryllina_05_2013_comp104501_c0_seq1
M_beryllina_05_2013_comp104502_c1_seq1	CUST_3340_PI429335447	GAAACTTATAAACGGATTACGAAGGTGGACCTGAACTTCCCAAAAGTTGTCTCTGATGGC	XP_004545891	ENSDART00000054823	aurkb	aurora kinase b-like	GO:0002903,GO:0034501,GO:0000122,GO:0007275,GO:0036089,GO:0046872,GO:0006468,GO:0005694,GO:0004674,GO:0007059,GO:0034644,GO:0005634,GO:0005524,GO:0051256,GO:0009069	NA	NA	M_beryllina_05_2013_comp104502_c1_seq1
M_beryllina_05_2013_comp104504_c0_seq1	CUST_4123_PI429335447	AAGAAGAAGAAAAATATCTCCCACGACATATTCGGCACCAAGTTCGGTCAGGTGCACATG	XP_003453067	ENSDART00000064542	rpf2	brix domain-containing protein 1	GO:0003674,GO:0008150,GO:0005575	NA	NA	M_beryllina_05_2013_comp104504_c0_seq1
M_beryllina_05_2013_comp104505_c0_seq1	CUST_17539_PI429335447	TAAGGCCAGGATAAAGGCAAAAGCCATCGCTATCAACACTTTCATGCCAAAGAACGGGTA	XP_004574638	ENSDART00000089506	larp4b	la-related protein 4b-like	GO:0003676	NA	NA	M_beryllina_05_2013_comp104505_c0_seq1
M_beryllina_05_2013_comp104507_c0_seq2	CUST_8218_PI429335447	TAACAGACAGCTCCAACGGACAGACGGTAACGGTGAGTCCCGGCTCTTTGTGAGGATGCA	XP_004571634	ENSDART00000078421	cyb5d1	cytochrome b5 domain-containing protein 1-like	GO:0020037,GO:0046872	NA	NA	M_beryllina_05_2013_comp104507_c0_seq2
M_beryllina_05_2013_comp104512_c0_seq5	CUST_41905_PI429335447	TCAGAAAGACATCGAAATGTTTGATTCTGCCATCCTGCTGATTCGAAATCCCTACCGCTC	XP_003449880	ENSDART00000113112	WSCD1 (2 of 3)	wsc domain-containing protein 1-like	GO:0008146,GO:0001525	NA	NA	M_beryllina_05_2013_comp104512_c0_seq5
M_beryllina_05_2013_comp104513_c0_seq1	CUST_26539_PI429335447	GTGGGCATGCATAATGAAGATTGTTTGACAGAACAATGGAAAATGCCAAGTCCTGCAATG	XP_004552329	NA	NA	PREDICTED: uncharacterized protein C17orf104 homolog	0	NA	NA	M_beryllina_05_2013_comp104513_c0_seq1
M_beryllina_05_2013_comp104518_c0_seq1	CUST_11347_PI429335447	ATTTATCATCAGTGCGAATGAGGCAAAGACACCAACAAAGCTGTACCACTTCCAGCTACG	XP_003459023	ENSDART00000075943	ei24	etoposide-induced protein homolog	GO:0003674,GO:0005575	NA	NA	M_beryllina_05_2013_comp104518_c0_seq1
M_beryllina_05_2013_comp104521_c0_seq3	CUST_32509_PI429335447	TCAGGCATGAAGACAATGTCGTCCTTTTTCAGCCCTAAGGTCAAAGCGGAAAAGAAATAA	XP_004551301	ENSDART00000015377	rnaseh2b	ribonuclease h2 subunit b-like	GO:0005634	NA	NA	M_beryllina_05_2013_comp104521_c0_seq3
M_beryllina_05_2013_comp104525_c0_seq1	CUST_22840_PI429335447	ATCTCTGTAAGGGAACAGCATGGAGTTCCTCTCTCATCAAGCCTCTGGAGTTTTCCTTAA	XP_003451913	ENSDART00000082154	trim35-39	nuclear factor ovary-like	GO:0046872,GO:0008270,GO:0005622	NA	NA	M_beryllina_05_2013_comp104525_c0_seq1
M_beryllina_05_2013_comp104526_c0_seq1	CUST_27844_PI429335447	TTTGACCTGATGGACGCTACGCTCTGCGACACCATTGGCTCGCAGATCGTCAGCAGCAAA	XP_004560856	ENSDART00000152304	si:ch1073-357b18.4	PREDICTED: uncharacterized protein LOC101487867	0	NA	NA	M_beryllina_05_2013_comp104526_c0_seq1
M_beryllina_05_2013_comp104527_c0_seq4	CUST_40753_PI429335447	AAACAAAGATCCCGACGACTACCAGAGAGTGCTCTATGAAACTGCCAACAAGTACCACTT	XP_004571076	ENSDART00000056790	tmem256	upf0451 protein c17orf61 homolog	GO:0016020	NA	NA	M_beryllina_05_2013_comp104527_c0_seq4
M_beryllina_05_2013_comp104528_c0_seq2	CUST_7852_PI429335447	GATCAAGTCAGAAAGTGACTCTTATGAGCAAAAAGCGAGGGCCAATTTCATCCGTGTCAA	XP_003962124	ENSDART00000061499	cxcr4b	c-x-c chemokine receptor type 4	GO:0001764,GO:0032496,GO:0008354,GO:0090024,GO:0042119,GO:0007204,GO:0042074,GO:0048920,GO:0019958,GO:0016494,GO:0016021,GO:0030900,GO:0030239,GO:0031101,GO:0043130,GO:0050930,GO:0009887,GO:0007281,GO:0031290,GO:0005886,GO:0030516,GO:0002042,GO:0001570,GO:0070098,GO:0007187	NA	NA	M_beryllina_05_2013_comp104528_c0_seq2
M_beryllina_05_2013_comp104530_c0_seq1	CUST_23488_PI429335447	AACCAGAACCTGCCAGAGGCTGTGACTCTAGTACCAGCTCTCAACACCCTCAGTATATAG	XP_003449175	ENSDART00000034690	otud3	otu domain-containing protein 6b	GO:0003674,GO:0008150,GO:0005575	NA	NA	M_beryllina_05_2013_comp104530_c0_seq1
M_beryllina_05_2013_comp104531_c2_seq4	CUST_11344_PI429335447	TTTCTTTACAGGGACGTGTTCACTTTTATGATCATAGCCTGCTCCTTCACGGTGACCCTA	XP_003971558	ENSDART00000085263	EPT1	ethanolaminephosphotransferase 1-like	GO:0008654,GO:0016780,GO:0016020	NA	NA	M_beryllina_05_2013_comp104531_c2_seq4
M_beryllina_05_2013_comp104533_c0_seq3	CUST_37207_PI429335447	AAGTCTCAGGTGTTGACTATTCTGCATGAAGTGTTTCCAGCTGTAAAGGCAGCAGAGATG	XP_004549876	ENSDART00000051312	ttc33	tetratricopeptide repeat protein 33-like	GO:0008150,GO:0005575	NA	NA	M_beryllina_05_2013_comp104533_c0_seq3
M_beryllina_05_2013_comp104536_c1_seq1	CUST_3307_PI429335447	AATAAATGGAGTTGTCTACACAGGTGTCCTGTTTGCTCAGCAGTCCACCATCTCGATGAT	XP_004558711	ENSDART00000097546	ARID3C	at-rich interactive domain-containing protein 3a-like	GO:0005634,GO:0003677	NA	NA	M_beryllina_05_2013_comp104536_c1_seq1
M_beryllina_05_2013_comp104537_c0_seq5	CUST_21382_PI429335447	ATTACAAGGGTCAGTACATCCTGACACTCTCAGAGGAAATTGTGGATGGTCACGAGAAAG	XP_003971191	ENSDART00000032909	htatip	myst histone acetyltransferase 1	GO:0016747,GO:0005634,GO:0006355	NA	NA	M_beryllina_05_2013_comp104537_c0_seq5
M_beryllina_05_2013_comp104540_c0_seq1	CUST_36712_PI429335447	AGAGCTGTGTAAGACCCTGTACACCCTGTTCAGTGAGGAGCCTCAGGAGCAGCAGCTGTA	XP_003458714	ENSDART00000143909	tbc1d9	tbc1 domain family member 9b-like	GO:0046872,GO:0032313,GO:0005096	NA	NA	M_beryllina_05_2013_comp104540_c0_seq1
M_beryllina_05_2013_comp104544_c2_seq1	CUST_14596_PI429335447	AAATGGTATCATGAATGTGTCTGCAGTGGACAAGAGCACCGGGAAAGAGAAGAAGATCAC	AFX73250	ENSDART00000099994	hspa8	heat shock protein 70	GO:0005524,GO:0006950	NA	NA	M_beryllina_05_2013_comp104544_c2_seq1
M_beryllina_05_2013_comp104552_c0_seq2	CUST_35203_PI429335447	ATGTACATTCAACAACAGAAGGAAAAACCTCCAGACAACACTACAACAGTTTGGGTGTGA	XP_003963220	ENSDART00000111570	slc26a10	solute carrier family 26 member 6-like	GO:0008272,GO:0055081,GO:0055085,GO:0016021,GO:0008271,GO:0009651,GO:0006821	NA	NA	M_beryllina_05_2013_comp104552_c0_seq2
M_beryllina_05_2013_comp104555_c0_seq2	CUST_24166_PI429335447	AAGAGATATTCCATGCTGGTGGAAGATGGAGTTGTGAAGAAGATCAACGTGGAGCCTGAT	ADI78068	ENSDART00000129035	prdx5	peroxiredoxin- mitochondrial precursor	GO:0016491,GO:0031101,GO:0055114	NA	NA	M_beryllina_05_2013_comp104555_c0_seq2
M_beryllina_05_2013_comp104557_c0_seq2	CUST_20551_PI429335447	GGAAGGATCTTTGTCTTTAAAGCTGCCAGTGGGGAAAGCAGTTGTCCAGTCACTATCTTT	XP_003454127	ENSDART00000060978	wdr83	mitogen-activated protein kinase organizer 1	GO:0016301,GO:0005737,GO:0016310	NA	NA	M_beryllina_05_2013_comp104557_c0_seq2
M_beryllina_05_2013_comp104571_c0_seq1	CUST_1789_PI429335447	AATGTATGTTGAATGACGAAACCTGGTACATCCTCTACTCCAGCATCGGGTCGTTTTTCG	CAG03287	ENSDART00000101562	adra2c	alpha-2 adrenergic receptor-like	GO:0007194,GO:0004938,GO:0016021,GO:0071875,GO:0005886,GO:0007187	NA	NA	M_beryllina_05_2013_comp104571_c0_seq1
M_beryllina_05_2013_comp104573_c0_seq1	CUST_39484_PI429335447	AAAGCTCAAGAGGCAGAAGTACGACATCCACGTGCTCCGCAACCGGGTCAGTGACCATCA	XP_003452065	ENSDART00000044154	tnnt2c	transposable element tcb1 transposase	GO:0004803,GO:0015074,GO:0006313,GO:0003677,GO:0006396,GO:0005622	NA	NA	M_beryllina_05_2013_comp104573_c0_seq1
M_beryllina_05_2013_comp104575_c0_seq3	CUST_40402_PI429335447	ACTTAAAGAGAGACTGGACCTACCGATGACAGAGATAGTGACCAAGGTGTCCAAAAAGAA	XP_004070535	ENSDART00000054691	uba1	ubiquitin-like modifier-activating enzyme 1-like	GO:0016874,GO:0008641,GO:0006464,GO:0005524	NA	NA	M_beryllina_05_2013_comp104575_c0_seq3
M_beryllina_05_2013_comp104576_c0_seq7	CUST_6589_PI429335447	TTGAGTCTTGTGTCTCCTGTTCTTCTCACTTTAATGCTGGCTCAGGAAACCTCCAGCATT	XP_004545783	ENSDART00000140625	cstf2	cleavage stimulation factor subunit 2-like	GO:0003676,GO:0000166,GO:0005575	NA	NA	M_beryllina_05_2013_comp104576_c0_seq7
M_beryllina_05_2013_comp104578_c0_seq1	CUST_10957_PI429335447	AAACTGTCTGAACAAAAACCACCTCAACTTGTGTCTGAAGAGTCAGTCGGTCAGTGGTCA	XP_003441929	ENSDART00000080382	epas1b	endothelial pas domain-containing protein 1-like	GO:0051402	NA	NA	M_beryllina_05_2013_comp104578_c0_seq1
M_beryllina_05_2013_comp104579_c0_seq2	CUST_6532_PI429335447	CAAGGAAAGCATATCTACAAAGGAGCTGTGTCACATTCTCATATCTCCGCCTACACAAGA	ACQ58812	ENSDART00000021137	CLDN10 (1 of 5)	claudin-10-like isoform 1	GO:0016021,GO:0005198,GO:0005923,GO:0005886	NA	NA	M_beryllina_05_2013_comp104579_c0_seq2
M_beryllina_05_2013_comp104579_c0_seq3	CUST_6535_PI429335447	CAAGGAAAGCATATCTACAAAGGAGCTGTGTCACATTCTCATATCTCCGCCTACACAAGA	ACQ58812	ENSDART00000021137	CLDN10 (1 of 5)	claudin-10-like isoform 2	GO:0016020,GO:0030054	NA	NA	M_beryllina_05_2013_comp104579_c0_seq3
M_beryllina_05_2013_comp104582_c1_seq1	CUST_41497_PI429335447	TAATTTTGAAAATGGCACCCCTCCGACCAATTTCGATACCTTCCCTGCAGCAATAATGAC	XP_004558539	ENSDART00000138765	cacna1aa	voltage-dependent p q-type calcium channel subunit alpha-1a	GO:0005245,GO:0034765,GO:0070588,GO:0005891	NA	NA	M_beryllina_05_2013_comp104582_c1_seq1
M_beryllina_05_2013_comp104586_c0_seq2	CUST_35155_PI429335447	ATGTTTGTCGGAGGTTTCTTCGGCTTCATATTGGACAACACCATTCCAGGAACTAAGCAG	XP_004069901	ENSDART00000074361	zgc:110789	solute carrier family 23 member 2-like	GO:0055085,GO:0016020,GO:0005215	NA	NA	M_beryllina_05_2013_comp104586_c0_seq2
M_beryllina_05_2013_comp104593_c0_seq3	CUST_40858_PI429335447	CCTCTGCAAGGCCAAGGCTGGAACACAGAAAATGCCAAGGAAATCCTTAGTATTTTACAG	XP_004547242	ENSDART00000061832	C8H5orf51	upf0600 protein c5orf51 homolog	0	NA	NA	M_beryllina_05_2013_comp104593_c0_seq3
M_beryllina_05_2013_comp104594_c0_seq2	CUST_31666_PI429335447	AGAGGAGATCCTTGAGAACTGGAACATGTTTGTCGGAAGTCAGGCCACTAATTATGGAGA	XP_004539490	ENSDART00000102363	rcn1	rcn1_takru ame: full=reticulocalbin-1 flags: precursor	GO:0042470,GO:0005509,GO:0033018,GO:0005576	NA	NA	M_beryllina_05_2013_comp104594_c0_seq2
M_beryllina_05_2013_comp104595_c0_seq2	CUST_35737_PI429335447	AAGGACGAAAAATGGCGGCGTCGTCTAAGAAAGTGTTTGAGGTCTTCGTGTCTAAAGTAC	XP_004569993	NA	NA	sra stem-loop-interacting rna-binding mitochondrial precursor	GO:0003676,GO:0000166	NA	NA	M_beryllina_05_2013_comp104595_c0_seq2
M_beryllina_05_2013_comp104597_c0_seq2	CUST_6280_PI429335447	TACTGCGGTAAGCATTCGAGCCACCATGCAACAGCAGCATTTGGCTAGTGCCCGAAACCG	XP_004561037	ENSDART00000079842	chtopa	chromatin target of prmt1	GO:0003674,GO:0008150,GO:0005575	NA	NA	M_beryllina_05_2013_comp104597_c0_seq2
M_beryllina_05_2013_comp104599_c0_seq1	CUST_29770_PI429335447	CTGCTGGAGCTGGAGAAAGGGGCTCTTATTGAGGAGATTGAGGAGCTGCATGCCTGCTGA	XP_003450763	NA	NA	protein g7d-like	0	NA	NA	M_beryllina_05_2013_comp104599_c0_seq1
M_beryllina_05_2013_comp104602_c0_seq2	CUST_1921_PI429335447	AAGATAAAATCTGTACTGTTGAGGCAAATGTGCTGACCTCGAAACACACCCAGGAGGAGA	XP_004564082	ENSDART00000115165	amer2	apc membrane recruitment protein 2-like	GO:0008289,GO:0007398,GO:0005546,GO:0016020,GO:0016055,GO:0090090,GO:0005886	NA	NA	M_beryllina_05_2013_comp104602_c0_seq2
M_beryllina_05_2013_comp104604_c0_seq3	CUST_34180_PI429335447	ATAATTTATGATACTCTCACAGGGCTCGTGGTGCTCATCGGGAGAATTATTGATCCTACA	XP_003971529	ENSDART00000010293	serpina10a	serpina1 partial	GO:0010951,GO:0030162,GO:0004867	NA	NA	M_beryllina_05_2013_comp104604_c0_seq3
M_beryllina_05_2013_comp104611_c0_seq1	CUST_16402_PI429335447	TCTTTTTGCTGCTCTTCGACACGGACAGACAATCCAAAAACAAACACGCACTGTTTGCGT	XP_003453550	ENSDART00000124433	si:ch211-198c19.1	interferon-inducible protein gig1	0	NA	NA	M_beryllina_05_2013_comp104611_c0_seq1
M_beryllina_05_2013_comp104615_c0_seq2	CUST_9943_PI429335447	GCTTGTCAGCAGATGAACAAGAGGGATCAGGCCCGTTTCATCCATCACTATGAAAACTTT	XP_004567720	ENSDART00000090727	duox	dual oxidase 1-like	GO:0006979,GO:0009617,GO:0002523,GO:0020037,GO:0005509,GO:0004601,GO:0050665,GO:0016021,GO:0055114,GO:0006804	NA	NA	M_beryllina_05_2013_comp104615_c0_seq2
M_beryllina_05_2013_comp104618_c0_seq3	CUST_1675_PI429335447	TAAAGATAAAGGAGTTCAGTTTCCACCATTATCTACTTGCAGGGTCACGCAGACGTATGA	XP_003447343	ENSDART00000062850	agps	alkyldihydroxyacetonephosphate peroxisomal-like	GO:0050660,GO:0008609,GO:0008762,GO:0008610,GO:0055114,GO:0046486,GO:0006040	NA	NA	M_beryllina_05_2013_comp104618_c0_seq3
M_beryllina_05_2013_comp104619_c0_seq1	CUST_30217_PI429335447	TTTAGGACCGACTGGGACTCAGGACCCACCAGGACTCTGGACTTATCGGGACTCAGACAT	XP_004572933	NA	NA	protein phosphatase 1 regulatory subunit 3d-like	GO:0003674,GO:0008150,GO:0005575	NA	NA	M_beryllina_05_2013_comp104619_c0_seq1
M_beryllina_05_2013_comp104621_c2_seq1	CUST_16873_PI429335447	TCCTACACACTCAGCGCCGAAACAGGAACTCTGAAATTCATCGCAGTCAGAAAAGAAGAT	XP_004567493	ENSDART00000088546	jam3b	junctional adhesion molecule c-like	GO:0007520,GO:0005515	NA	NA	M_beryllina_05_2013_comp104621_c2_seq1
M_beryllina_05_2013_comp104622_c0_seq4	CUST_27967_PI429335447	TGATGATGAAAATGACGATGACCAAGGACCTGAGGAGGTTCAGCTTGAACAGAAGAGTGT	XP_003442140	ENSDART00000011780	xab2	pre-mrna-splicing factor syf1	GO:0005622,GO:0006396	NA	NA	M_beryllina_05_2013_comp104622_c0_seq4
M_beryllina_05_2013_comp104625_c0_seq1	CUST_29317_PI429335447	TTCAAGAAACAAATATTCCATATGGCCATCATCATCAAATGATGTGCACCCCCGCCAACA	XP_003438758	ENSDART00000008011	ubald1a	protein fam100a-like	GO:0003674,GO:0008150,GO:0005575	NA	NA	M_beryllina_05_2013_comp104625_c0_seq1
M_beryllina_05_2013_comp104628_c0_seq2	CUST_17860_PI429335447	TTCTGATGGAGTTAGAGGAGGAACCCAAAGCACAGCACTCTGTCCACTGCAGCCCCTCAC	XP_004566544	ENSDART00000085419	LGR4	leucine-rich repeat-containing g-protein coupled receptor 5- partial	GO:0016021,GO:0007186,GO:0004930	NA	NA	M_beryllina_05_2013_comp104628_c0_seq2
M_beryllina_05_2013_comp104628_c0_seq3	CUST_17863_PI429335447	ACCACAACCAGATAGAGGAACTCCAGGAGAACACCTTCGTGGGCCTGATGTCACTGCGCT	XP_003448186	ENSDART00000085419	LGR4	leucine-rich repeat-containing g-protein coupled receptor 5-like	GO:0016021,GO:0007186,GO:0004930	NA	NA	M_beryllina_05_2013_comp104628_c0_seq3
M_beryllina_05_2013_comp104629_c0_seq1	CUST_17002_PI429335447	GCTGCCGCTCATCGACAACTACTGCATCTTCCAGATGGCCGTGGCCTCCACTAATTTCTA	XP_004071333	ENSDART00000066368	klhl11	kelch-like protein 11	GO:0008150,GO:0005575	NA	NA	M_beryllina_05_2013_comp104629_c0_seq1
M_beryllina_05_2013_comp104630_c1_seq1	CUST_22024_PI429335447	CTAGAGGAGGAGCTGGATGAAGCTGTAGAGAGAAGTCTGAAGAGTTTACTGAGTAAAAAT	XP_004077146	ENSDART00000129866	pcsk2	neuroendocrine convertase 2 precursor	GO:0033334,GO:0004252,GO:0060536,GO:0006508,GO:0048703	NA	NA	M_beryllina_05_2013_comp104630_c1_seq1
M_beryllina_05_2013_comp104631_c0_seq1	CUST_37108_PI429335447	GATAATCAGCTGGCTGTACATCACTCGTGTTGAAGATGCCATCAGTGAGTATGGTCACTA	XP_003969528	ENSDART00000057641	tspan15	tetraspanin-15-like	GO:0016021	NA	NA	M_beryllina_05_2013_comp104631_c0_seq1
M_beryllina_05_2013_comp104633_c0_seq6	CUST_3802_PI429335447	ATCGATTGTGTGGCAGGATGTTTTCGACTACAATGAACGACGCAGTTCTTTGTCAGTGGT	XP_004070040	ENSDART00000051291	hexa	beta-hexosaminidase subunit beta-like	GO:0005975,GO:0004563,GO:0001575,GO:0006027,GO:0006040	NA	NA	M_beryllina_05_2013_comp104633_c0_seq6
M_beryllina_05_2013_comp104633_c0_seq7	CUST_3799_PI429335447	TATTTTTCCTGACTACGCTCCTGGAAATTATAAACTTCGGGTCCGTGAGGACAAGCCATT	XP_004553155	ENSDART00000051291	hexa	beta-hexosaminidase subunit alpha-like	GO:0005975,GO:0004563,GO:0001575,GO:0006027,GO:0006040	NA	NA	M_beryllina_05_2013_comp104633_c0_seq7
M_beryllina_05_2013_comp104634_c0_seq2	CUST_42349_PI429335447	TGAACGACTACTTGGTCGAGCTGTCCCTGAACAGGAAGGAGAACGAGGCTCTCAAGCTGC	XP_004545508	ENSDART00000124192	CR855307.2	---NA---	0	NA	NA	M_beryllina_05_2013_comp104634_c0_seq2
M_beryllina_05_2013_comp104634_c0_seq3	CUST_42865_PI429335447	AGAGCTGGGAGATGGCGTCCTCGGAACCAGCAGATGGCGGTATGACCATGGATGAGCTGC	XP_004545508	ENSDART00000124192	CR855307.2	zinc finger protein 665-like	GO:0003676,GO:0008150,GO:0008270,GO:0005622	NA	NA	M_beryllina_05_2013_comp104634_c0_seq3
M_beryllina_05_2013_comp104635_c0_seq1	CUST_2842_PI429335447	TTCCTGGGATCCAGCAACAAGAGAGCCAAGACCCTGGTCCTGCAGGTCCAGGGTCTGGAG	CAD27772	ENSDART00000136910	armc1l	armadillo repeat-containing protein 1-like	GO:0046872,GO:0030001,GO:0005575	NA	NA	M_beryllina_05_2013_comp104635_c0_seq1
M_beryllina_05_2013_comp104636_c0_seq2	CUST_38788_PI429335447	ATTGCTGCATCATGCAGCTTTAACATTGCACTTTGGCCAGTGTGGTCATTCTTCACTCCT	ACI67045	ENSDART00000082184	TMEM128	transmembrane protein 128	GO:0016021	NA	NA	M_beryllina_05_2013_comp104636_c0_seq2
M_beryllina_05_2013_comp104637_c0_seq3	CUST_24355_PI429335447	AAGATGACCATGCAGGAGTACAACATGCTCCAGGAGCAGGAGGACGACGAGGACTTCCTG	XP_003451512	ENSDART00000024096	pdcl	phosducin-like isoform 1	GO:0005575	NA	NA	M_beryllina_05_2013_comp104637_c0_seq3
M_beryllina_05_2013_comp104638_c1_seq1	CUST_4900_PI429335447	ATCATGAAGAGAAACATTGCTAACTATGAGGAGCAGCTGGTGACCCTGTTTGGAAGTAGC	XP_004567800	ENSDART00000046626	PRKAR2B	camp-dependent protein kinase type ii-alpha regulatory subunit-like	GO:0045859,GO:0016301,GO:0005515,GO:0007165,GO:0008603,GO:0005952	NA	NA	M_beryllina_05_2013_comp104638_c1_seq1
M_beryllina_05_2013_comp104640_c0_seq1	CUST_26860_PI429335447	GAGATGTCCAAGTTTGTTAATGATATGTCAATGACAGACCGGGAGTTCAGCCTATTCTGA	XP_004070861	NA	NA	PREDICTED: uncharacterized protein LOC101158608	0	NA	NA	M_beryllina_05_2013_comp104640_c0_seq1
M_beryllina_05_2013_comp104642_c0_seq7	CUST_26362_PI429335447	AAGGAGGTTTCTGATTGGCTGTCGGACCTGATCCTGGTGGACCAGCATCCTGATCTGGAG	XP_003456278	ENSDART00000101580	nicn1	PREDICTED: nicolin-1-like	GO:0003674,GO:0008150,GO:0005575	NA	NA	M_beryllina_05_2013_comp104642_c0_seq7
M_beryllina_05_2013_comp104643_c0_seq3	CUST_33817_PI429335447	TAAAATCAAAACATCCAAAAGCAAGACCTCCCTAAAACAGCTGACACCCTCAAATGAAGA	XP_003448557	ENSDART00000082362	mak	serine threonine-protein kinase mak	GO:0005524,GO:0004672,GO:0000166,GO:0006468,GO:0016772,GO:0004674,GO:0016310,GO:0016301,GO:0005575	NA	NA	M_beryllina_05_2013_comp104643_c0_seq3
M_beryllina_05_2013_comp104645_c1_seq1	CUST_40792_PI429335447	AACTATTCGTTTTCAAACGATGAGGTCTGGCGTATAGATCGAGAGAATCAGCGTCTTCTC	XP_004549540	ENSDART00000078874	zgc:85910	upf0501 protein kiaa1430 homolog isoform x2	GO:0003674,GO:0008150,GO:0005575	NA	NA	M_beryllina_05_2013_comp104645_c1_seq1
M_beryllina_05_2013_comp104645_c1_seq3	CUST_40789_PI429335447	TAGTAGCAGGAAATCCTCAGCATCTGTAGATTCCAGGTCCATTGGCTCGAAAGCAGTTTT	XP_004549539	ENSDART00000078874	zgc:85910	upf0501 protein kiaa1430 homolog isoform x1	GO:0003674,GO:0008150,GO:0005575	NA	NA	M_beryllina_05_2013_comp104645_c1_seq3
M_beryllina_05_2013_comp104646_c0_seq3	CUST_32101_PI429335447	ATGTATGATATAATTCGGGAAAACAAGCGGAACGAGAAGGAAACCAGGATCCAGCAGCTC	XP_004073854	ENSDART00000134466	rp9	retinitis pigmentosa 9 protein homolog	GO:0008270,GO:0003676	NA	NA	M_beryllina_05_2013_comp104646_c0_seq3
M_beryllina_05_2013_comp104649_c1_seq1	CUST_6550_PI429335447	AGGTAAAGTGATGATCATCTCCGGGATTTTCTTCATCCTGTCCGGCATTTTGGTCCTCAT	XP_004076221	ENSDART00000101211	cldnh	claudin-3-like	GO:0005923,GO:0005198,GO:0005886,GO:0016021	NA	NA	M_beryllina_05_2013_comp104649_c1_seq1
M_beryllina_05_2013_comp104650_c0_seq1	CUST_7177_PI429335447	AGCTCCAGTGAGTTGATGGAGGTGAATGAACCTTTGATACAGCTCAAACTGCAGACACAA	ACQ58712	ENSDART00000130715	commd4	comm domain-containing protein 4	GO:0003674,GO:0008150,GO:0005575,GO:0046872,GO:0008270	NA	NA	M_beryllina_05_2013_comp104650_c0_seq1
M_beryllina_05_2013_comp104652_c0_seq1	CUST_35122_PI429335447	TTCTGTACAGAGCCTGCATCACACAGATTCCCTCAGGTTACTACATACAGACGATGAACT	XP_003967433	ENSDART00000126552	SLC15A5	solute carrier family 15 member 5-like	GO:0016020,GO:0006810,GO:0005215	NA	NA	M_beryllina_05_2013_comp104652_c0_seq1
M_beryllina_05_2013_comp104653_c0_seq2	CUST_32419_PI429335447	TTAATGTGTACAGACAGCCACTGCCCAACGCTTTGATAAATCTGGAAGAGATCCCAGATG	XP_004558921	ENSDART00000127445	arhgef3l	rho guanine nucleotide exchange factor 3-like	GO:0005089,GO:0005543,GO:0005622,GO:0035023,GO:0043087	NA	NA	M_beryllina_05_2013_comp104653_c0_seq2
M_beryllina_05_2013_comp104656_c0_seq1	CUST_30979_PI429335447	TGACTTCTCTCAAACACCTCCTAGCAGCACCCTTGTACATTTGGACATTGACATAGAGGA	XP_004560639	ENSDART00000102424	DCHS1 (1 of 2)	protocadherin-16-like	GO:0005509,GO:0007156,GO:0016021,GO:0007155,GO:0016020,GO:0005886	NA	NA	M_beryllina_05_2013_comp104656_c0_seq1
M_beryllina_05_2013_comp104659_c1_seq2	CUST_34534_PI429335447	AAATCCAAATACTTCTTCTTCGACGACGGGAACGGACTCAGGGCCAATAAGAACATCACT	XP_003456599	ENSDART00000129714	spcs3	signal peptidase complex subunit 3	GO:0008233,GO:0006465,GO:0016021,GO:0005787	NA	NA	M_beryllina_05_2013_comp104659_c1_seq2
M_beryllina_05_2013_comp104661_c0_seq7	CUST_16927_PI429335447	GAACTTTCAAGAAACGAGAAGAGACTGCAGGACAGTCGTTCAGACGACAGGAATGTTGAT	XP_004550602	ENSDART00000123432	katnbl1	katnb1-like protein 1-like	GO:0051013,GO:0008017,GO:0008352	NA	NA	M_beryllina_05_2013_comp104661_c0_seq7
M_beryllina_05_2013_comp104662_c0_seq10	CUST_30763_PI429335447	GTGGCTACTGCAGTCTTTCAGCCAATTATTATTTACTGGTTAACCTCTCACTTGGTCAGG	XP_003444660	ENSDART00000137782	yif1a	protein yif1a-like	GO:0000139,GO:0005789,GO:0016192,GO:0016021,GO:0015031	NA	NA	M_beryllina_05_2013_comp104662_c0_seq10
M_beryllina_05_2013_comp104676_c1_seq1	CUST_37687_PI429335447	TAAACGGAGAGAAACTCAGCTCCAAAAAGAAAGAAAGACAGAACAGAGTTCCAGAAGCCC	CAG09677	ENSDART00000083193	zgc:158343	tor4a_danre ame: full=torsin-4a ame: full=torsin family 4 member a	GO:0003674,GO:0043066,GO:0005575,GO:0005524,GO:0016021,GO:0000166,GO:0016020,GO:0017111,GO:0051085	NA	NA	M_beryllina_05_2013_comp104676_c1_seq1
M_beryllina_05_2013_comp104676_c1_seq2	CUST_37690_PI429335447	TAAACGGAGAGAAACTCAGCTCCAAAAAGAAAGAAAGACAGAACAGAGTTCCAGAAGCCC	CAG09677	ENSDART00000083193	zgc:158343	torsin family protein c9orf167 homolog	GO:0003674,GO:0043066,GO:0005575,GO:0005524,GO:0016021,GO:0000166,GO:0016020,GO:0017111,GO:0051085	NA	NA	M_beryllina_05_2013_comp104676_c1_seq2
M_beryllina_05_2013_comp104677_c0_seq8	CUST_8155_PI429335447	CTGGAAACTCAGCAAAAGAAAATGTGAGAGCAGCAATATGATGGAATATGTGATTCTTAT	XP_003445276	ENSDART00000075157	chic1	cysteine-rich hydrophobic domain 2	GO:0003674,GO:0008150,GO:0005575	NA	NA	M_beryllina_05_2013_comp104677_c0_seq8
M_beryllina_05_2013_comp104679_c4_seq1	CUST_39343_PI429335447	GGGCTGGCTAACTCCATCTCCTCAGCTCTCATTAAACCCGTCCAGAGGATCACCAAGTAC	XP_004565670	ENSDART00000087055	TRIO (2 of 2)	triple functional domain isoform x1	GO:0005089,GO:0006468,GO:0004674,GO:0005543,GO:0005524,GO:0035023,GO:0005737,GO:0043087,GO:0009069	NA	NA	M_beryllina_05_2013_comp104679_c4_seq1
M_beryllina_05_2013_comp104679_c5_seq4	CUST_16894_PI429335447	TGGACTCTGAAGAAACGCAGACTGGACCAGTGCCAGCAGTTCCTGATGTTCCAGAGCCAC	XP_004565670	ENSDART00000087055	TRIO (2 of 2)	kalirin-like isoform x2	GO:0004672,GO:0005622,GO:0005085,GO:0000166,GO:0016310,GO:0043087	NA	NA	M_beryllina_05_2013_comp104679_c5_seq4
M_beryllina_05_2013_comp104680_c0_seq2	CUST_700_PI429335447	TGCAACCATAAGTTCTACGGACAGCAGTGCTGCAAGTCCTGCTCCAGCAGGAAGCCCTAG	XP_004539857	ENSDART00000004120	adamts18	a disintegrin and metalloproteinase with thrombospondin motifs 16-like	GO:0004222,GO:0005578,GO:0006508,GO:0008270	NA	NA	M_beryllina_05_2013_comp104680_c0_seq2
M_beryllina_05_2013_comp104685_c0_seq1	CUST_26995_PI429335447	TGATTAGGTCAGAGGGCAGCTCCGTGTCAGAGTCTACAGGACACCACAATGGTGAAGCGG	XP_004086441	NA	NA	PREDICTED: uncharacterized protein LOC101166455	0	NA	NA	M_beryllina_05_2013_comp104685_c0_seq1
[truncated: 12,961 more rows]
